# Supplementary material for: Reduction of Fmr1 mRNA Levels Rescues Pathological Features in Cortical Neurons in a Model of FXTAS
Source: PubMed Central journal article supplement — Mol Ther Nucleic Acids. 2019 Sep 26;18:546–53. doi: 10.1016/j.omtn.2019.09.018 (PMC6838541; doi:10.1016/j.omtn.2019.09.018), 2019-09-26
Supplement: mmc1.pdf [file mmc1.pdf]

## **Supplemental Information**

### **Reduction of *Fmr1* mRNA Levels Rescues**

### **Pathological Features in Cortical**

### **Neurons in a Model of FXTAS**

**Malgorzata Drozd, Sébastien Delhayé, Thomas Maurin, Sara Castagnola, Mauro Grossi, Frédéric Brau, Marielle Jarjat, Rob Willemsen, Maria Capovilla, Renate K. Hukema, Enzo Lalli, and Barbara Bardoni**

## Supplementary Figure legends

**Supp. Figure 1. Dendritic arborization of WT and KI mouse cortical neurons.** (A) Representative images of cultured cortical WT and KI-CGG neurons. Scale bars: 20 $\mu$ m (B) Sholl analysis of cultured WT and KI-CGG mouse cortical neurons. A reduced arborization is observed for CGG-KI. Repeated measures ANOVA with two factors:  $f(1,72)=9.943$   $p=0.0024$ .

**Supp. Figure 2. Axons of 2 DIV cultures of KI-CGG cortical neurons are shorter than WT.** (A) Representative pictures of 2 days *in vitro* cultured WT and KI-CGG primary cortical neurons. Scale bars: 10  $\mu$ m. (B) Histogram of axon length of WT and KI-CGG. Results show the mean axon length  $\pm$  SEM of 150 randomly selected cells for each condition from three independent cultures. Mann-Whitney test \*\*\* $p<0.001$ .

Fig. S1

A



B



Fig. S2

A



WT

KI

B



Table S1. Proteins identified in the various samples by nanoLC MS/MS.

| LEGEND:             |                                                 | ratio     |                                      | ratio                                                                                               |  | STATISTICS:                                                                |  |
|---------------------|-------------------------------------------------|-----------|--------------------------------------|-----------------------------------------------------------------------------------------------------|--|----------------------------------------------------------------------------|--|
| # ratio             | KI-93 only, and ratio(KIscr/WT)>2               | # ratio   | KI-93 only, and ratio(KI93/WT)>2     | Columns EN, EP and ER                                                                               |  | Student t-test between 2 conditions, with 3 replicates for each condition. |  |
| # Spectra           | =1 spectrum in KI-scr samples                   | # Spectra | =1 spectrum in KI-93 samples         | p-values returned by the t-test are listed before the corresponding ratios (columns EO, EQ and ES). |  | Data have been normalized before statistics.                               |  |
| # Spectra           | =2-5 spectra in KI-scr samples                  | # Spectra | =2-5 spectra in KI-93 samples        | p-value <0.05                                                                                       |  |                                                                            |  |
| # Spectra           | =6-10 spectra in KI-scr samples                 | # Spectra | =6-10 spectra in KI-93 samples       | p-value 0.05-0.10                                                                                   |  |                                                                            |  |
| # Spectra           | =11-30 spectra in KI-scr samples                | # Spectra | =11-30 spectra in KI-93 samples      |                                                                                                     |  |                                                                            |  |
| # Spectra           | =31 spectra minimum in KI-scr samples           | # Spectra | =31 spectra minimum in KI-93 samples |                                                                                                     |  |                                                                            |  |
| # ratio             | WT only, and ratio(KIscr/WT)<0.5                | # ratio   | KI-82 only, and ratio(KI82/WT)>2     |                                                                                                     |  |                                                                            |  |
| # Spectra           | =1 spectrum in WT samples                       | # Spectra | =1 spectrum in KI-82 samples         |                                                                                                     |  |                                                                            |  |
| # Spectra           | =2-5 spectra in WT samples                      | # Spectra | =2-5 spectra in KI-82 samples        |                                                                                                     |  |                                                                            |  |
| # Spectra           | =6-10 spectra in WT samples                     | # Spectra | =6-10 spectra in KI-82 samples       |                                                                                                     |  |                                                                            |  |
| # Spectra           | =11-30 spectra in WT samples                    | # Spectra | =11-30 spectra in KI-82 samples      |                                                                                                     |  |                                                                            |  |
| # Spectra           | =31 spectra minimum in WT samples               | # Spectra | =31 spectra minimum in KI-82 samples |                                                                                                     |  |                                                                            |  |
| UniProt annotations | It contains "trans", "dendrit", "axon", "synap" |           |                                      |                                                                                                     |  |                                                                            |  |

NO FILTER

**Total number of proteins:**

| accession                                                                                        | description | protein_set_score | BASIC Spectral Count (Protein) |      |      |        |      |      |       |      |      |       |      |      |
|--------------------------------------------------------------------------------------------------|-------------|-------------------|--------------------------------|------|------|--------|------|------|-------|------|------|-------|------|------|
|                                                                                                  |             |                   | WT                             |      |      | KI-scr |      |      | KI-93 |      |      | KI-82 |      |      |
| Total Number of Proteins identified in a dedicated samples in the M.musculus taxonomy from UniPr |             |                   | 2047                           | 1979 | 1803 | 2053   | 2224 | 2069 | 2182  | 1854 | 1893 | 2039  | 1817 | 1718 |
| Concentration (µg/L) obtained after a Bradford assay (performed by the proteomics facility)      |             |                   | 2.08                           | 1.31 | 2.28 | 1.79   | 2.26 | 2.52 | 1.31  | 2.33 | 2.15 | 1.61  | 2.08 | 2.22 |

**Proteins only identified in all 3 KI samples (scr + 93 + 82):**

| accession             | description                                        | protein_set_score | Exp. from 01/02/2017           |   |   |        |   |   |       |   |   |       |   |   | Exp. 01/02/2017 |                 |                |                |
|-----------------------|----------------------------------------------------|-------------------|--------------------------------|---|---|--------|---|---|-------|---|---|-------|---|---|-----------------|-----------------|----------------|----------------|
|                       |                                                    |                   | BASIC Spectral Count (Protein) |   |   |        |   |   |       |   |   |       |   |   | Exp. 01/02/2017 |                 |                |                |
|                       |                                                    |                   | WT                             |   |   | KI-scr |   |   | KI-93 |   |   | KI-82 |   |   | # Repl.         | KI-scr / WT-scr | KI-93 / WT-scr | KI-82 / WT-scr |
| sp Q6Z058 LARP1_MOUSE | La-related protein 1 OS=Mus musculus (M            | 209.47            | 3                              | 2 | 1 | 2      | 1 | 1 | 1     | 1 | 1 | 1     | 1 | 1 | 0               | 3               | 1              | 1              |
| sp A2B40 ARI1_MOUSE   | AT-rich interactive domain-containing protein      | 144.43            | 3                              | 2 | 1 | 2      | 1 | 1 | 1     | 1 | 1 | 1     | 1 | 1 | 0               | 2               | 1              | 1              |
| sp P0DN34 NDU1_MOUSE  | NADH dehydrogenase [ubiquinone] 1 beta             | 35.77             | 2                              | 2 | 1 | 2      | 1 | 1 | 1     | 1 | 1 | 1     | 1 | 1 | 0               | 2               | 1              | 1              |
| sp Q0C0W1 YKT6_MOUSE  | Synaptobrevin homolog YKT6 OS=Mus musculus         | 442.81            | 2                              | 1 | 2 | 2      | 1 | 1 | 1     | 1 | 1 | 1     | 1 | 1 | 0               | 3               | 1              | 3              |
| sp Q0PCX7 IRGMA_MOUSE | Repulsive guidance molecule A OS=Mus musculus      | 102.65            | 2                              | 1 | 1 | 1      | 1 | 1 | 2     | 1 | 1 | 1     | 1 | 1 | 0               | 3               | 3              | 3              |
| sp Q0B25 EIF3K_MOUSE  | Eukaryotic translation initiation factor 3 subunit | 153.19            | 2                              | 1 | 1 | 1      | 1 | 3 | 2     | 1 | 1 | 1     | 1 | 1 | 0               | 3               | 2              | 1              |
| sp Q8VFK0 CC50A_MOUSE | Cell cycle control protein 50A OS=Mus musculus     | 247.64            | 3                              | 1 | 1 | 1      | 1 | 1 | 1     | 1 | 1 | 1     | 1 | 1 | 0               | 2               | 1              | 1              |
| sp P24638 PPAL_MOUSE  | Lysosomal acid phosphatase OS=Mus musculus         | 102.66            | 2                              | 1 | 1 | 1      | 1 | 1 | 2     | 1 | 1 | 1     | 1 | 1 | 0               | 2               | 2              | 1              |
| sp Q0R118 HTRA1_MOUSE | Serine protease HTRA1 OS=Mus musculus              | 498.96            | 2                              | 1 | 1 | 1      | 1 | 1 | 2     | 1 | 1 | 1     | 1 | 1 | 0               | 2               | 1              | 1              |
| sp A2A699 F1712_MOUSE | Protein FAM171A2 OS=Mus musculus (Mo               | 485.37            | 4                              | 1 | 2 | 2      | 2 | 2 | 2     | 2 | 2 | 2     | 2 | 2 | 0               | 3               | 1              | 3              |
| sp Q8V6W6 UL1_MOUSE   | NEDD8-activating enzyme E1 regulatory subunit      | 213.87            | 1                              | 3 | 2 | 1      | 1 | 1 | 2     | 2 | 1 | 1     | 1 | 1 | 0               | 3               | 2              | 1              |
| sp Q8V6W6 UL1_MOUSE   | NEDD8-activating enzyme E1 regulatory subunit      | 213.87            | 1                              | 3 | 2 | 1      | 1 | 1 | 2     | 2 | 1 | 1     | 1 | 1 | 0               | 3               | 2              | 1              |
| sp Q8V6W6 UL1_MOUSE   | NEDD8-activating enzyme E1 regulatory subunit      | 213.87            | 1                              | 3 | 2 | 1      | 1 | 1 | 2     | 2 | 1 | 1     | 1 | 1 | 0               | 3               | 2              | 1              |
| sp Q8V6W6 UL1_MOUSE   | NEDD8-activating enzyme E1 regulatory subunit      | 213.87            | 1                              | 3 | 2 | 1      | 1 | 1 | 2     | 2 | 1 | 1     | 1 | 1 | 0               | 3               | 2              | 1              |
| sp Q8V6W6 UL1_MOUSE   | NEDD8-activating enzyme E1 regulatory subunit      | 213.87            | 1                              | 3 | 2 | 1      | 1 | 1 | 2     | 2 | 1 | 1     | 1 | 1 | 0               | 3               | 2              | 1              |
| sp Q8V6W6 UL1_MOUSE   | NEDD8-activating enzyme E1 regulatory subunit      | 213.87            | 1                              | 3 | 2 | 1      | 1 | 1 | 2     | 2 | 1 | 1     | 1 | 1 | 0               | 3               | 2              | 1              |
| sp Q8V6W6 UL1_MOUSE   | NEDD8-activating enzyme E1 regulatory subunit      | 213.87            | 1                              | 3 | 2 | 1      | 1 | 1 | 2     | 2 | 1 | 1     | 1 | 1 | 0               | 3               | 2              | 1              |
| sp Q8V6W6 UL1_MOUSE   | NEDD8-activating enzyme E1 regulatory subunit      | 213.87            | 1                              | 3 | 2 | 1      | 1 | 1 | 2     | 2 | 1 | 1     | 1 | 1 | 0               | 3               | 2              | 1              |
| sp Q8V6W6 UL1_MOUSE   | NEDD8-activating enzyme E1 regulatory subunit      | 213.87            | 1                              | 3 | 2 | 1      | 1 | 1 | 2     | 2 | 1 | 1     | 1 | 1 | 0               | 3               | 2              | 1              |
| sp Q8V6W6 UL1_MOUSE   | NEDD8-activating enzyme E1 regulatory subunit      | 213.87            | 1                              | 3 | 2 | 1      | 1 | 1 | 2     | 2 | 1 | 1     | 1 | 1 | 0               | 3               | 2              | 1              |
| sp Q8V6W6 UL1_MOUSE   | NEDD8-activating enzyme E1 regulatory subunit      | 213.87            | 1                              | 3 | 2 | 1      | 1 | 1 | 2     | 2 | 1 | 1     | 1 | 1 | 0               | 3               | 2              | 1              |
| sp Q8V6W6 UL1_MOUSE   | NEDD8-activating enzyme E1 regulatory subunit      | 213.87            | 1                              | 3 | 2 | 1      | 1 | 1 | 2     | 2 | 1 | 1     | 1 | 1 | 0               | 3               | 2              | 1              |
| sp Q8V6W6 UL1_MOUSE   | NEDD8-activating enzyme E1 regulatory subunit      | 213.87            | 1                              | 3 | 2 | 1      | 1 | 1 | 2     | 2 | 1 | 1     | 1 | 1 | 0               | 3               | 2              | 1              |
| sp Q8V6W6 UL1_MOUSE   | NEDD8-activating enzyme E1 regulatory subunit      | 213.87            | 1                              | 3 | 2 | 1      | 1 | 1 | 2     | 2 | 1 | 1     | 1 | 1 | 0               | 3               | 2              | 1              |
| sp Q8V6W6 UL1_MOUSE   | NEDD8-activating enzyme E1 regulatory subunit      | 213.87            | 1                              | 3 | 2 | 1      | 1 | 1 | 2     | 2 | 1 | 1     | 1 | 1 | 0               | 3               | 2              | 1              |
| sp Q8V6W6 UL1_MOUSE   | NEDD8-activating enzyme E1 regulatory subunit      | 213.87            | 1                              | 3 | 2 | 1      | 1 | 1 | 2     | 2 | 1 | 1     | 1 | 1 | 0               | 3               | 2              | 1              |
| sp Q8V6W6 UL1_MOUSE   | NEDD8-activating enzyme E1 regulatory subunit      | 213.87            | 1                              | 3 | 2 | 1      | 1 | 1 | 2     | 2 | 1 | 1     | 1 | 1 | 0               | 3               | 2              | 1              |
| sp Q8V6W6 UL1_MOUSE   | NEDD8-activating enzyme E1 regulatory subunit      | 213.87            | 1                              | 3 | 2 | 1      | 1 | 1 | 2     | 2 | 1 | 1     | 1 | 1 | 0               | 3               | 2              | 1              |
| sp Q8V6W6 UL1_MOUSE   | NEDD8-activating enzyme E1 regulatory subunit      | 213.87            | 1                              | 3 | 2 | 1      | 1 | 1 | 2     | 2 | 1 | 1     | 1 | 1 | 0               | 3               | 2              | 1              |
| sp Q8V6W6 UL1_MOUSE   | NEDD8-activating enzyme E1 regulatory subunit      | 213.87            | 1                              | 3 | 2 | 1      | 1 | 1 | 2     | 2 | 1 | 1     | 1 | 1 | 0               | 3               | 2              | 1              |
| sp Q8V6W6 UL1_MOUSE   | NEDD8-activating enzyme E1 regulatory subunit      | 213.87            | 1                              | 3 | 2 | 1      | 1 | 1 | 2     | 2 | 1 | 1     | 1 | 1 | 0               | 3               | 2              | 1              |
| sp Q8V6W6 UL1_MOUSE   | NEDD8-activating enzyme E1 regulatory subunit      | 213.87            | 1                              | 3 | 2 | 1      | 1 | 1 | 2     | 2 | 1 | 1     | 1 | 1 | 0               | 3               | 2              | 1              |
| sp Q8V6W6 UL1_MOUSE   | NEDD8-activating enzyme E1 regulatory subunit      | 213.87            | 1                              | 3 | 2 | 1      | 1 | 1 | 2     | 2 | 1 | 1     | 1 | 1 | 0               | 3               | 2              | 1              |
| sp Q8V6W6 UL1_MOUSE   | NEDD8-activating enzyme E1 regulatory subunit      | 213.87            | 1                              | 3 | 2 | 1      | 1 | 1 | 2     | 2 | 1 | 1     | 1 | 1 | 0               | 3               | 2              | 1              |
| sp Q8V6W6 UL1_MOUSE   | NEDD8-activating enzyme E1 regulatory subunit      | 213.87            | 1                              | 3 | 2 | 1      | 1 | 1 | 2     | 2 | 1 | 1     | 1 | 1 | 0               | 3               | 2              | 1              |
| sp Q8V6W6 UL1_MOUSE   | NEDD8-activating enzyme E1 regulatory subunit      | 213.87            | 1                              | 3 | 2 | 1      | 1 | 1 | 2     | 2 | 1 | 1     | 1 | 1 | 0               | 3               | 2              | 1              |
| sp Q8V6W6 UL1_MOUSE   | NEDD8-activating enzyme E1 regulatory subunit      | 213.87            | 1                              | 3 | 2 | 1      | 1 | 1 | 2     | 2 | 1 | 1     | 1 | 1 | 0               | 3               | 2              | 1              |
| sp Q8V6W6 UL1_MOUSE   | NEDD8-activating enzyme E1 regulatory subunit      | 213.87            | 1                              | 3 | 2 | 1      | 1 | 1 | 2     | 2 | 1 | 1     | 1 | 1 | 0               | 3               | 2              | 1              |
| sp Q8V6W6 UL1_MOUSE   | NEDD8-activating enzyme E1 regulatory subunit      | 213.87            | 1                              | 3 | 2 | 1      | 1 | 1 | 2     | 2 | 1 | 1     | 1 | 1 | 0               | 3               | 2              | 1              |
| sp Q8V6W6 UL1_MOUSE   | NEDD8-activating enzyme E1 regulatory subunit      | 213.87            | 1                              | 3 | 2 | 1      | 1 | 1 | 2     | 2 | 1 | 1     | 1 | 1 | 0               | 3               | 2              | 1              |
| sp Q8V6W6 UL1_MOUSE   | NEDD8-activating enzyme E1 regulatory subunit      | 213.87            | 1                              | 3 | 2 | 1      | 1 | 1 | 2     | 2 | 1 | 1     | 1 | 1 | 0               | 3               | 2              | 1              |
| sp Q8V6W6 UL1_MOUSE   | NEDD8-activating enzyme E1 regulatory subunit      | 213.87            | 1                              | 3 | 2 | 1      | 1 | 1 | 2     | 2 | 1 | 1     | 1 | 1 | 0               | 3               | 2              | 1              |
| sp Q8V6W6 UL1_MOUSE   | NEDD8-activating enzyme E1 regulatory subunit      | 213.87            | 1                              | 3 | 2 | 1      | 1 | 1 | 2     | 2 | 1 | 1     | 1 | 1 | 0               | 3               | 2              | 1              |
| sp Q8V6W6 UL1_MOUSE   | NEDD8-activating enzyme E1 regulatory subunit      | 213.87            | 1                              | 3 | 2 | 1      | 1 | 1 | 2     | 2 | 1 | 1     | 1 | 1 | 0               | 3               | 2              | 1              |
| sp Q8V6W6 UL1_MOUSE   | NEDD8-activating enzyme E1 regulatory subunit      | 213.87            | 1                              | 3 | 2 | 1      | 1 | 1 | 2     | 2 | 1 | 1     | 1 | 1 | 0               | 3               | 2              | 1              |
| sp Q8V6W6 UL1_MOUSE   | NEDD8-activating enzyme E1 regulatory subunit      | 213.87            | 1                              | 3 | 2 | 1      | 1 | 1 | 2     | 2 | 1 | 1     | 1 | 1 | 0               | 3               | 2              | 1              |
| sp Q8V6W6 UL1_MOUSE   | NEDD8-activating enzyme E1 regulatory subunit      | 213.87            | 1                              | 3 | 2 | 1      | 1 | 1 | 2     | 2 | 1 | 1     | 1 | 1 | 0               | 3               | 2              | 1              |
| sp Q8V6W6 UL1_MOUSE   | NEDD8-activating enzyme E1 regulatory subunit      | 213.87            | 1                              | 3 | 2 | 1      | 1 | 1 | 2     | 2 | 1 | 1     | 1 | 1 | 0               | 3               | 2              | 1              |
| sp Q8V6W6 UL1_MOUSE   | NEDD8-activating enzyme E1 regulatory subunit      | 213.87            | 1                              | 3 | 2 | 1      | 1 | 1 | 2     | 2 | 1 | 1     | 1 | 1 | 0               | 3               | 2              | 1              |
| sp Q8V6W6 UL1_MOUSE   | NEDD8-activating enzyme E1 regulatory subunit      | 213.87            | 1                              | 3 | 2 | 1      | 1 | 1 | 2     | 2 | 1 | 1     | 1 | 1 | 0               | 3               | 2              | 1              |
| sp Q8V6W6 UL1_MOUSE   | NEDD8-activating enzyme E1 regulatory subunit      | 213.87            | 1                              | 3 | 2 | 1      | 1 | 1 | 2     | 2 | 1 | 1     | 1 | 1 | 0               | 3               | 2              | 1              |
| sp Q8V6W6 UL1_MOUSE   | NEDD8-activating enzyme E1 regulatory subunit      | 213.87            | 1                              | 3 | 2 | 1      | 1 | 1 | 2     | 2 | 1 | 1     | 1 | 1 | 0               | 3               | 2              | 1              |
| sp Q8V6W6 UL1_MOUSE   | NEDD8-activating enzyme E1 regulatory subunit      | 213.87            | 1                              | 3 | 2 | 1      | 1 | 1 | 2     | 2 | 1 | 1     | 1 | 1 | 0               | 3               | 2              | 1              |
| sp Q8V6W6 UL1_MOUSE   | NEDD8-activating enzyme E1 regulatory subunit      | 213.87            | 1                              | 3 | 2 | 1      | 1 | 1 | 2     | 2 | 1 | 1     | 1 | 1 | 0               | 3               | 2              | 1              |
| sp Q8V6W6 UL1_MOUSE   | NEDD8-activating enzyme E1 regulatory subunit      | 213.87            | 1                              | 3 | 2 | 1      | 1 | 1 | 2     | 2 | 1 | 1     | 1 | 1 | 0               | 3               | 2              | 1              |
| sp Q8V6W6 UL1_MOUSE   | NEDD8-activating enzyme E1 regulatory subunit      | 213.87            | 1                              | 3 | 2 | 1      | 1 | 1 | 2     | 2 | 1 | 1     | 1 | 1 | 0               | 3               | 2              | 1              |
| sp Q8V6W6 UL1_MOUSE   | NEDD8-activating enzyme E1 regulatory subunit      | 213.87            | 1                              | 3 | 2 | 1      | 1 | 1 | 2     | 2 | 1 | 1     | 1 | 1 | 0               | 3               | 2              | 1              |
| sp Q8V6W6 UL1_MOUSE   | NEDD8-activating enzyme E1 regulatory subunit      | 213.87            | 1                              | 3 | 2 | 1      | 1 | 1 | 2     | 2 | 1 | 1     | 1 | 1 | 0               | 3               | 2              | 1              |
| sp Q8V6W6 UL1_MOUSE   | NEDD8-activating enzyme E1 regulatory subunit      | 213.87            | 1                              | 3 | 2 | 1      | 1 | 1 | 2     | 2 | 1 | 1     | 1 | 1 | 0               | 3               | 2              | 1              |
| sp Q8V6W6 UL1_MOUSE   | NEDD8-activating enzyme E1 regulatory subunit      | 213.87            | 1                              | 3 | 2 | 1      | 1 | 1 | 2     | 2 | 1 | 1     | 1 | 1 | 0               | 3               | 2              | 1              |
| sp Q8V6W6 UL1_MOUSE   | NEDD8-activating enzyme E1 regulatory subunit      | 213.87            | 1                              | 3 | 2 | 1      | 1 | 1 | 2     | 2 | 1 | 1     | 1 | 1 | 0               | 3               | 2              | 1              |
| sp Q8V6W6 UL1_MOUSE   | NEDD8-activating enzyme E1 regulatory subunit      | 213.87            | 1                              | 3 | 2 | 1      | 1 | 1 | 2     | 2 | 1 | 1     | 1 | 1 | 0               | 3               | 2              | 1              |
| sp Q8V6W6 UL1_MOUSE   | NEDD8-activating enzyme E1 regulatory subunit      | 213.87            | 1                              | 3 | 2 | 1      | 1 | 1 | 2     | 2 | 1 | 1     | 1 | 1 | 0               | 3               | 2              | 1              |
| sp Q8V6W6 UL1_MOUSE   | NEDD8-activating enzyme E1 regulatory subunit      | 213.87            | 1                              | 3 | 2 | 1      | 1 | 1 | 2     | 2 | 1 | 1     | 1 | 1 | 0               | 3               | 2              | 1              |
| sp Q8V6W6 UL1_MOUSE   | NEDD8-activating enzyme E1 regulatory subunit      | 213.87            | 1                              | 3 | 2 | 1      | 1 | 1 | 2     | 2 | 1 | 1     | 1 | 1 | 0               | 3               | 2              | 1              |
| sp Q8V6W6 UL1_MOUSE   | NEDD8-activating enzyme E1 regulatory subunit      | 213.87            | 1                              | 3 | 2 | 1      | 1 | 1 | 2     | 2 | 1 | 1     | 1 | 1 | 0               | 3               | 2              |                |

| Accession              | Description                                  | Protein Set Score | 1 | 2 | 3 | 1 | 2 | 3 | 1 | 2 | 3 | 1 | 2 | 3 | # Rep. | KI-scr  | KI-93       | WT-scr  | KI-82      | WT-scr |
|------------------------|----------------------------------------------|-------------------|---|---|---|---|---|---|---|---|---|---|---|---|--------|---------|-------------|---------|------------|--------|
| sp O35972 RM23_MOUSE   | 39S ribosomal protein L23, mitochondrial     | 49.71             | 1 | 1 |   | 1 | 1 |   |   |   |   | 0 | 2 | 1 | 0      | 0.11728 | KI-scr only | 0.37390 | KI-93 only |        |
| sp Q8BGR6 ARL15_MOUSE  | ADP-ribosylation factor-like protein 15      | 44.41             | 1 | 1 |   | 1 | 1 |   |   |   |   | 0 | 2 | 1 | 0      | 0.11728 | KI-scr only | 0.37390 | KI-93 only |        |
| sp Q8R466 NUP53_MOUSE  | Nucleoporin NUP53                            | 35.48             | 1 | 1 |   | 1 | 1 |   |   |   |   | 0 | 2 | 1 | 0      | 0.11728 | KI-scr only | 0.37390 | KI-93 only |        |
| sp Q8V870 TMX1_MOUSE   | Thioredoxin-related transmembrane protein    | 85.48             | 1 | 1 |   | 1 | 1 |   |   |   |   | 0 | 2 | 1 | 0      | 0.11728 | KI-scr only | 0.37390 | KI-93 only |        |
| sp Q6PH08 NAA3_MOUSE   | Nalpa-acetyltransferase 35, Na/C auxiliary   | 115.24            | 1 | 1 |   | 1 | 1 |   |   |   |   | 0 | 2 | 1 | 0      | 0.11728 | KI-scr only | 0.37390 | KI-93 only |        |
| sp O05512 MARK2_MOUSE  | Serine/threonine-protein kinase MARK2        | 278.66            | 1 | 1 |   | 1 | 1 |   |   |   |   | 0 | 2 | 1 | 0      | 0.11728 | KI-scr only | 0.37390 | KI-93 only |        |
| sp Q8C3F2 F120C_MOUSE  | Constitutive coactivator of PPAR-gamma-like  | 219.45            | 1 | 1 |   | 2 | 1 |   |   |   |   | 0 | 2 | 1 | 0      | 0.11661 | KI-scr only | 0.37390 | KI-93 only |        |
| sp P11531 DMO1_MOUSE   | Hypoxanthine phosphoribosyl transferase      | 52.75             | 1 | 1 |   | 1 | 1 | 1 |   |   |   | 0 | 2 | 1 | 0      | 0.11661 | KI-scr only | 0.00005 | KI-93 only |        |
| sp Q8V026 IMP3_MOUSE   | Inositol monophosphatase 3                   | 81.94             | 1 | 1 |   | 2 | 1 |   |   |   |   | 0 | 1 | 2 | 0      | 0.37390 | KI-scr only | 0.14329 | KI-93 only |        |
| sp Q8P906 FKB15_MOUSE  | FK506-binding protein 15                     | 63.91             | 1 | 1 |   | 2 | 1 |   |   |   |   | 0 | 1 | 1 | 0      | 0.37390 | KI-scr only | 0.37390 | KI-93 only |        |
| sp Q8C166 CPNE1_MOUSE  | Copine-1                                     | 142.14            | 1 | 1 |   | 2 | 1 |   |   |   |   | 0 | 1 | 1 | 0      | 0.37390 | KI-scr only | 0.37390 | KI-93 only |        |
| sp Q62W32 Q62W3_MOUSE  | Theta 4, X chromosome                        | 48.74             | 1 | 1 |   | 2 | 1 |   |   |   |   | 0 | 1 | 1 | 0      | 0.37390 | KI-scr only | 0.37390 | KI-93 only |        |
| sp P49769 PSN1_MOUSE   | Presenilin-1                                 | 37.89             | 1 | 1 |   | 1 | 1 |   |   |   |   | 0 | 1 | 1 | 0      | 0.37390 | KI-scr only | 0.37390 | KI-93 only |        |
| sp Q01G21 G21_MOUSE    | Phosphomevalonate kinase                     | 159.96            | 2 | 2 |   |   |   | 1 |   |   |   | 0 | 2 | 1 | 0      | 0.11626 | KI-scr only | 0.37390 | KI-93 only |        |
| sp Q6Z008 CNOT1_MOUSE  | OCR4-NOT transcription complex subunit 1     | 236.17            | 2 | 2 |   | 2 | 2 |   |   |   |   | 0 | 2 | 1 | 0      | 0.15432 | KI-scr only | 0.37390 | KI-93 only |        |
| sp Q6R216 NDT4_MOUSE   | Diphosphoinositide polyphosphate phosphatase | 148.53            | 2 | 2 |   | 1 | 1 | 1 |   |   |   | 0 | 2 | 2 | 0      | 0.37332 | KI-scr only | 0.11624 | KI-93 only |        |
| sp Q8EKR1 PPT2_MOUSE   | Receptor-type tyrosine-protein phosphatase   | 135.73            | 2 | 2 |   | 1 | 1 | 1 |   |   |   | 0 | 1 | 0 | 0      | 0.37390 | KI-scr only | 0.18328 | KI-93 only |        |
| sp A9C473 A9C473_MOUSE | Protein A630010A05Rik (Fragment)             | 31.7              | 2 | 2 |   |   |   |   |   |   |   | 0 | 1 | 1 | 0      | 0.37390 | KI-scr only | 0.37390 | KI-93 only |        |
| sp P70429 EVL_MOUSE    | Ena/VASP-like protein                        | 380.87            | 2 | 2 |   | 2 | 2 |   |   |   |   | 0 | 1 | 1 | 0      | 0.37390 | KI-scr only | 0.37390 | KI-93 only |        |
| sp Q3UE37 UBE2Z_MOUSE  | Ubiquitin-conjugating enzyme E2 Z            | 163.62            | 2 | 2 |   |   |   | 1 |   |   |   | 0 | 1 | 2 | 0      | 0.37390 | KI-scr only | 0.11834 | KI-93 only |        |
| sp P53811 PMP2_MOUSE   | Phosphatidylinositol transfer protein beta 1 | 174.35            | 2 | 2 |   |   |   |   |   |   |   | 0 | 1 | 1 | 0      | 0.37390 | KI-scr only | 0.37390 | KI-93 only |        |
| sp P22315 HEMH_MOUSE   | Ferrochelatase, mitochondrial                | 126.93            | 2 | 2 |   | 1 | 1 |   |   |   |   | 0 | 1 | 1 | 0      | 0.37390 | KI-scr only | 0.37390 | KI-93 only |        |
| sp Q64737 PUR2_MOUSE   | Trifunctional purine biosynthetic protein    | 223.96            | 1 | 2 | 1 | 2 | 1 |   |   |   |   | 0 | 2 | 2 | 0      | 0.16239 | KI-scr only | 0.17504 | KI-93 only |        |
| sp P26039 TLN1_MOUSE   | Talin-1                                      | 163.8             | 1 | 1 |   | 1 | 1 |   |   |   |   | 0 | 2 | 2 | 0      | 0.11626 | KI-scr only | 0.11834 | KI-93 only |        |
| sp D44FX7 DAFX7_MOUSE  | Protein Dnae13                               | 128.46            | 1 | 1 |   | 1 | 1 |   |   |   |   | 0 | 2 | 2 | 0      | 0.11626 | KI-scr only | 0.11834 | KI-93 only |        |
| sp Q3TAS6 EMC10_MOUSE  | ER membrane protein complex subunit 10       | 86.8              | 1 | 1 |   | 1 | 1 |   |   |   |   | 0 | 2 | 2 | 0      | 0.11626 | KI-scr only | 0.37390 | KI-93 only |        |
| sp Q8K120 COO9_MOUSE   | Ubiquitin ubiquitin-protein complex COO9, mb | 112.45            | 1 | 1 |   | 1 | 1 |   |   |   |   | 0 | 2 | 1 | 0      | 0.11626 | KI-scr only | 0.37390 | KI-93 only |        |
| sp Q920A5 RSC_MOUSE    | Retinoid-inducible serine carboxypeptidase   | 78.79             | 1 | 1 |   | 1 | 1 |   |   |   |   | 0 | 2 | 1 | 0      | 0.11626 | KI-scr only | 0.37390 | KI-93 only |        |
| sp P83870 PHF5A_MOUSE  | PHD finger-like domain-containing protein 5  | 189.55            | 1 | 1 |   | 1 | 1 |   |   |   |   | 0 | 2 | 1 | 0      | 0.11626 | KI-scr only | 0.37390 | KI-93 only |        |
| sp Q7T741 MBE1A_MOUSE  | Myo-binding protein 1A                       | 303.45            | 1 | 1 |   | 1 | 1 |   |   |   |   | 0 | 2 | 1 | 0      | 0.11626 | KI-scr only | 0.37390 | KI-93 only |        |
| sp E9Q740 E9Q740_MOUSE | Protein Sp72                                 | 466.95            | 1 | 1 |   | 1 | 1 |   |   |   |   | 0 | 2 | 1 | 0      | 0.11626 | KI-scr only | 0.37390 | KI-93 only |        |
| sp Q9WU28 PF05_MOUSE   | Prefoldin subunit 5                          | 156.04            | 1 | 1 |   | 1 | 1 |   |   |   |   | 0 | 2 | 1 | 0      | 0.11626 | KI-scr only | 0.37390 | KI-93 only |        |
| sp Q9CY27 TECR_MOUSE   | Very-long-chain enoyl-CoA reductase          | 200.24            | 1 | 1 |   | 1 | 1 |   |   |   |   | 0 | 2 | 1 | 0      | 0.11626 | KI-scr only | 0.37390 | KI-93 only |        |
| sp Q35V16 RPKPF2_MOUSE | Rap1 GTPase-activating protein 2             | 43.76             | 1 | 1 |   | 1 | 1 |   |   |   |   | 0 | 2 | 1 | 0      | 0.11626 | KI-scr only | 0.37390 | KI-93 only |        |
| sp Q9K0C4 CPS1A_MOUSE  | Lanosterol 14-alpha demethylase              | 334.38            | 1 | 1 |   | 1 | 1 |   |   |   |   | 0 | 2 | 2 | 0      | 0.11626 | KI-scr only | 0.11624 | KI-93 only |        |
| sp Q9R1V7 ADK3_MOUSE   | Disintegrin and metalloproteinase domain-c   | 69.29             | 1 | 2 | 1 | 2 | 1 |   |   |   |   | 0 | 1 | 1 | 0      | 0.37390 | KI-scr only | 0.37390 | KI-93 only |        |
| sp Q9H393 PLXD1_MOUSE  | Plexin-D1                                    | 64.86             | 1 | 2 | 1 | 1 | 1 |   |   |   |   | 0 | 1 | 2 | 0      | 0.37390 | KI-scr only | 0.11948 | KI-93 only |        |
| sp P50544 ACADV_MOUSE  | Very-long-chain specific acyl-CoA dehydrog   | 278.89            | 1 | 1 |   | 1 | 1 |   |   |   |   | 0 | 1 | 2 | 0      | 0.37390 | KI-scr only | 0.11948 | KI-93 only |        |
| sp Q9R313 EXOC8_MOUSE  | Exocyst complex component 8                  | 70.99             | 1 | 1 |   | 1 | 1 |   |   |   |   | 0 | 1 | 2 | 0      | 0.37390 | KI-scr only | 0.11834 | KI-93 only |        |
| sp Q8BNW9 KBTB_MOUSE   | Kelch repeat and BTB domain-containing p     | 65.66             | 1 | 1 |   | 1 | 1 |   |   |   |   | 0 | 1 | 2 | 0      | 0.37390 | KI-scr only | 0.11834 | KI-93 only |        |
| sp Q3TDQ1 STT3B_MOUSE  | Dolichyl-diphosphoglycerol-3-phospho         | 140.56            | 1 | 1 |   | 1 | 1 |   |   |   |   | 0 | 1 | 2 | 0      | 0.37390 | KI-scr only | 0.11834 | KI-93 only |        |
| sp Q8VHY0 CSPG4_MOUSE  | Chondroitin sulfate proteoglycan 4           | 65.04             | 1 | 1 |   | 1 | 1 |   |   |   |   | 0 | 1 | 1 | 0      | 0.37390 | KI-scr only | 0.37390 | KI-93 only |        |
| sp Q8D766 ACAD8_MOUSE  | Acyl-CoA oxidase 8, mitochondrial            | 48                | 1 | 1 |   | 1 | 1 |   |   |   |   | 0 | 1 | 1 | 0      | 0.37390 | KI-scr only | 0.37390 | KI-93 only |        |
| sp Q91X59 ZFNB2_MOUSE  | ZNF domain zinc finger protein ZNF           | 44.42             | 1 | 1 |   | 1 | 1 |   |   |   |   | 0 | 1 | 1 | 0      | 0.37390 | KI-scr only | 0.37390 | KI-93 only |        |
| sp Q7T5Y6 CELFA_MOUSE  | CUGBP Elav-like family member 4              | 127.95            | 1 | 1 |   | 1 | 1 |   |   |   |   | 0 | 1 | 1 | 0      | 0.37390 | KI-scr only | 0.37390 | KI-93 only |        |
| sp Q04690 INF1_MOUSE   | Interferon beta 1                            | 205.39            | 1 | 1 |   | 1 | 1 |   |   |   |   | 0 | 1 | 1 | 0      | 0.37390 | KI-scr only | 0.37390 | KI-93 only |        |
| sp P97372 PSM2_MOUSE   | Proteasome activator complex subunit 2       | 112.16            | 1 | 1 |   | 1 | 1 |   |   |   |   | 0 | 1 | 1 | 0      | 0.37390 | KI-scr only | 0.37390 | KI-93 only |        |
| sp Q9D067 MCT1_MOUSE   | Malignant cell-associated sequence 1         | 285.27            | 1 | 1 |   | 1 | 1 |   |   |   |   | 0 | 1 | 1 | 0      | 0.37390 | KI-scr only | 0.37390 | KI-93 only |        |
| sp Q3UHK6 TEN4_MOUSE   | Tensin-4                                     | 96.83             | 1 | 1 |   | 1 | 1 |   |   |   |   | 0 | 1 | 1 | 0      | 0.37390 | KI-scr only | 0.37390 | KI-93 only |        |
| sp Q8CH72 TR13_MOUSE   | E3 ubiquitin-protein ligase TRIM32           | 50.98             | 1 | 1 |   | 1 | 1 |   |   |   |   | 0 | 1 | 1 | 0      | 0.37390 | KI-scr only | 0.37390 | KI-93 only |        |
| sp Q35459 ECH1_MOUSE   | Delta(3,5)Delta(2,4)dienoyl-CoA isomerase    | 90.64             | 1 | 1 |   | 1 | 1 |   |   |   |   | 0 | 1 | 1 | 0      | 0.37390 | KI-scr only | 0.37390 | KI-93 only |        |
| sp Q89863 STX6_MOUSE   | Syntaxin-6                                   | 76.02             | 1 | 1 |   | 1 | 1 |   |   |   |   | 0 | 1 | 1 | 0      | 0.37390 | KI-scr only | 0.37390 | KI-93 only |        |
| sp D3YW03 D3YW03_MOUSE | Dacryopodin kinase                           | 149.89            | 1 | 1 |   | 1 | 1 |   |   |   |   | 0 | 1 | 1 | 0      | 0.37390 | KI-scr only | 0.37390 | KI-93 only |        |
| sp Q8C0L0 TMX4_MOUSE   | Thioredoxin-related transmembrane protein    | 239.26            | 1 | 1 |   | 1 | 1 |   |   |   |   | 0 | 1 | 1 | 0      | 0.37390 | KI-scr only | 0.37390 | KI-93 only |        |
| sp Q8K3C3 LZIC_MOUSE   | Protein LZIC                                 | 194.67            | 2 | 2 |   | 2 | 2 |   |   |   |   | 0 | 1 | 1 | 0      | 0.37390 | KI-scr only | 0.37390 | KI-93 only |        |
| sp Q7TN66 IGS21_MOUSE  | Immunoglobulin superfamily member 21         | 184.28            | 1 | 2 | 1 | 2 | 1 |   |   |   |   | 0 | 1 | 1 | 0      | 0.37390 | KI-scr only | 0.37390 | KI-93 only |        |
| sp Q90Y17 L2L1_MOUSE   | Leish2 ligand larva protein                  | 101.38            | 1 | 1 |   | 1 | 1 |   |   |   |   | 0 | 1 | 1 | 0      | 0.37390 | KI-scr only | 0.11834 | KI-93 only |        |
| sp Q90K01 PDXK1_MOUSE  | Pyridoxal-dependent decarboxylase domain     | 50.61             | 1 | 1 |   | 1 | 1 |   |   |   |   | 0 | 1 | 1 | 0      | 0.37390 | KI-scr only | 0.37390 | KI-93 only |        |
| sp P32233 DRG1_MOUSE   | Developmentally-regulated GTP-binding pr     | 38.76             | 1 | 1 |   | 1 | 1 |   |   |   |   | 0 | 1 | 1 | 0      | 0.37390 | KI-scr only | 0.37390 | KI-93 only |        |
| sp Q9C062 DECR_MOUSE   | 2,4-dienoyl-CoA reductase, mitochondrial     | 106.01            | 1 | 1 |   | 1 | 1 |   |   |   |   | 0 | 1 | 1 | 0      | 0.37390 | KI-scr only | 0.37390 | KI-93 only |        |
| sp Q6N200 DNJC8_MOUSE  | Dnaj homolog subfamily C member 8            | 138.44            | 1 | 1 |   | 1 | 1 |   |   |   |   | 0 | 1 | 1 | 0      | 0.37390 | KI-scr only | 0.37390 | KI-93 only |        |
| sp D8R354 PLXB2_MOUSE  | Plexin-B2                                    | 287.35            | 1 | 1 |   | 1 | 1 |   |   |   |   | 0 | 1 | 1 | 0      | 0.37390 | KI-scr only | 0.37390 | KI-93 only |        |
| sp Q9G0S1 SCMC3_MOUSE  | Calcium-binding mitochondrial carrier protei | 104.92            | 1 | 1 |   | 1 | 1 |   |   |   |   | 0 | 1 | 1 | 0      | 0.37390 | KI-scr only | 0.37390 | KI-93 only |        |
| sp Q9C0M5 TXD17_MOUSE  | Thioredoxin domain-containing protein 17     | 108.04            | 1 | 1 |   | 1 | 1 |   |   |   |   | 0 | 1 | 1 | 0      | 0.37390 | KI-scr only | 0.37390 | KI-93 only |        |
| sp Q9L533 SERB_MOUSE   | Phosphoserine phosphatase                    | 64.08             | 1 | 1 |   | 2 | 1 |   |   |   |   | 0 | 1 | 2 | 0      | 0.37390 | KI-scr only | 0.16207 | KI-93 only |        |
| sp Q90327 GB2_MOUSE    | Guanine nucleotide-binding protein G12G      | 60.71             | 1 | 1 |   | 1 | 1 |   |   |   |   | 0 | 1 | 1 | 0      | 0.37390 | KI-scr only | 0.37390 | KI-93 only |        |
| sp Q8R2Y8 PTH2_MOUSE   | Peptidyl-HRNA hydrolase 2, mitochondrial     | 151.02            | 1 | 1 |   | 1 | 1 |   |   |   |   | 0 | 1 | 1 | 0      | 0.37390 | KI-scr only | 0.37390 | KI-93 only |        |
| sp Q8B7M8 FLNA_MOUSE   | Flamin-A                                     | 423.12            | 1 | 1 |   | 1 | 1 |   |   |   |   |   |   |   |        |         |             |         |            |        |









| accession              | description                                                                   | protein_set_score | 1 | 2 | 3 | 1 | 2 | 3 | 1 | 2 | 3 | 1 | 2 | 3 | WT | Ki-93 | Ki-92 | pvalue  | ratio | pvalue  | ratio | pvalue  | ratio |
|------------------------|-------------------------------------------------------------------------------|-------------------|---|---|---|---|---|---|---|---|---|---|---|---|----|-------|-------|---------|-------|---------|-------|---------|-------|
| trjQ3UAS3/G3UAS3_MOUSE | Putative uncharacterized protein OS=Mus m                                     | 781.64            | 1 | 4 | 1 | 3 | 4 | 4 | 5 | 3 | 4 | 8 | 3 | 2 | 3  | 3     | 3     | 0.19235 | 1.83  | 0.09663 | 2.00  | 0.23221 | 2.17  |
| sp Q02819 NUC1_MOUSE   | Nucleobindin-1 OS=Mus musculus (Mouse)                                        | 347.2             | 1 | 2 | 1 | 3 | 2 | 1 | 3 | 3 | 3 | 3 | 3 | 4 | 3  | 3     | 3     | 0.41806 | 1.50  | 0.06061 | 2.25  | 0.01969 | 2.50  |
| sp Q08B11 PRUNE_MOUSE  | Prune OS=Mus musculus (Mouse)                                                 | 746.56            | 1 | 2 | 1 | 1 | 1 | 3 | 1 | 1 | 1 | 2 | 3 | 2 | 1  | 2     | 3     | 0.22223 | 2.37  | 0.05223 | 2.00  | 0.05223 | 2.50  |
| sp P81021 RAB5B_MOUSE  | Ras-related protein Rab-5B OS=Mus musculus (Mouse)                            | 738.82            | 1 | 1 | 1 | 1 | 3 | 2 | 6 | 3 | 2 | 3 | 5 | 3 | 3  | 3     | 3     | 0.70674 | 0.80  | 0.27729 | 2.00  | 0.17769 | 2.00  |
| sp Q0D1K2 VATF_MOUSE   | V-type proton ATPase subunit F OS=Mus musculus (Mouse)                        | 262.28            | 1 | 1 | 1 | 1 | 3 | 1 | 3 | 2 | 1 | 3 | 2 | 1 | 3  | 3     | 3     | 0.39107 | 1.67  | 0.10538 | 2.00  | 0.08612 | 2.00  |
| sp Q09247 IMPI_MOUSE   | Mannose-6-phosphate isomerase OS=Mus musculus (Mouse)                         | 431.28            | 1 | 1 | 1 | 1 | 2 | 2 | 1 | 2 | 1 | 2 | 2 | 2 | 2  | 3     | 3     | 0.65202 | 1.50  | 0.07888 | 2.50  | 0.37128 | 2.00  |
| sp Q2L41 BZV2_MOUSE    | Basic leucine zipper and WZ domain-containing protein OS=Mus musculus (Mouse) | 307.81            | 1 | 1 | 1 | 1 | 2 | 2 | 3 | 2 | 1 | 1 | 2 | 2 | 2  | 2     | 2     | 0.68781 | 1.50  | 0.34853 | 2.50  | 0.12430 | 2.00  |
| sp Q0LM14 NTSC_MOUSE   | Nucleoside triphosphatase OS=Mus musculus (Mouse)                             | 133.86            | 1 | 1 | 1 | 1 | 1 | 1 | 1 | 1 | 1 | 1 | 1 | 1 | 1  | 1     | 1     | 0.46474 | 2.00  | 0.04647 | 2.00  | 0.04647 | 2.00  |
| sp Q0P4T2 UOS2_MOUSE   | U5 small nuclear ribonucleoprotein 200 kDa OS=Mus musculus (Mouse)            | 125.65            | 1 | 1 | 1 | 1 | 1 | 1 | 1 | 1 | 1 | 1 | 1 | 1 | 1  | 1     | 1     | 0.99759 | 1.00  | 0.10121 | 3.00  | 0.05091 | 5.00  |
| sp I47955 RLA1_MOUSE   | 60S acidic ribosomal protein P1 OS=Mus musculus (Mouse)                       | 124.65            | 1 | 1 | 1 | 1 | 1 | 1 | 1 | 1 | 1 | 1 | 1 | 1 | 1  | 1     | 1     | 0.99759 | 1.00  | 0.50267 | 2.00  | 0.08013 | 3.00  |
| sp Q0K019 BCLF1_MOUSE  | Bcl-2-associated transcription factor 1 OS=Mus musculus (Mouse)               | 173.04            | 1 | 1 | 1 | 1 | 1 | 1 | 2 | 1 | 1 | 1 | 1 | 1 | 1  | 1     | 2     | 0.94510 | 1.00  | 0.35515 | 3.00  | 0.46591 | 2.00  |
| sp Q0C035 BZV1_MOUSE   | Basic leucine zipper and WZ domain-containing protein OS=Mus musculus (Mouse) | 394.28            | 1 | 1 | 1 | 1 | 1 | 1 | 1 | 1 | 1 | 1 | 1 | 1 | 1  | 1     | 2     | 0.94510 | 1.00  | 0.52166 | 2.00  | 0.44226 | 2.00  |
| sp Q0T202 MT1_MOUSE    | Metallothionein-1 OS=Mus musculus (Mouse)                                     | 146.28            | 1 | 1 | 1 | 1 | 1 | 2 | 1 | 1 | 1 | 1 | 2 | 2 | 3  | 3     | 3     | 0.43345 | 1.50  | 0.16684 | 2.00  | 0.16221 | 2.00  |
| trjQ3U935/Q3U935_MOUSE | Putative uncharacterized protein OS=Mus musculus (Mouse)                      | 334.95            | 1 | 1 | 1 | 1 | 1 | 1 | 1 | 1 | 1 | 1 | 1 | 1 | 1  | 1     | 2     | 0.97304 | 1.00  | 0.68457 | 2.00  | 0.48226 | 2.00  |
| sp Q0H9W8 IGL05_MOUSE  | IgLN family member 5 OS=Mus musculus (Mouse)                                  | 180.88            | 1 | 1 | 1 | 1 | 1 | 1 | 2 | 2 | 1 | 1 | 1 | 2 | 1  | 1     | 2     | 0.96951 | 1.00  | 0.88457 | 2.00  | 0.13680 | 3.00  |
| sp Q0I0A7 DDX42_MOUSE  | ATP-dependent RNA helicase DDX42 OS=Mus musculus (Mouse)                      | 277.59            | 1 | 1 | 1 | 1 | 1 | 1 | 2 | 1 | 1 | 2 | 1 | 1 | 1  | 2     | 2     | 0.99676 | 1.00  | 0.86564 | 3.00  | 0.39668 | 3.00  |
| sp Q0K821 NM1_MOUSE    | Nm1 family domain-containing protein OS=Mus musculus (Mouse)                  | 125.41            | 1 | 1 | 1 | 1 | 1 | 1 | 2 | 1 | 1 | 2 | 1 | 1 | 1  | 1     | 1     | 0.58441 | 2.00  | 0.47370 | 2.00  | 0.47370 | 2.00  |

Proteins mostly identified in the KI-scr sample with ratio>2:

| accession                    | description                                                                | protein_set_score | Exp. from 01/02/2017 |   |   |        |    |    |       |   |   |       |   |   | # Repl. | Exp. 01/02/2017 |       |                |         |                |         |       |         |       |
|------------------------------|----------------------------------------------------------------------------|-------------------|----------------------|---|---|--------|----|----|-------|---|---|-------|---|---|---------|-----------------|-------|----------------|---------|----------------|---------|-------|---------|-------|
|                              |                                                                            |                   | WT                   |   |   | Ki-scr |    |    | Ki-93 |   |   | Ki-92 |   |   |         | Ki-scr / WT-scr |       | Ki-93 / WT-scr |         | Ki-92 / WT-scr |         |       |         |       |
| 1                            | 2                                                                          | 3                 | 1                    | 2 | 3 | 1      | 2  | 3  | 1     | 2 | 3 | 1     | 2 | 3 | WT      | Ki-scr          | Ki-93 | Ki-92          | pvalue  | ratio          | pvalue  | ratio | pvalue  | ratio |
| sp P05132 KAPCA_MOUSE        | CAMP-dependent protein kinase catalytic c                                  | 1235.28           | 6                    | 6 | 4 | 10     | 12 | 11 | 12    | 2 | 4 | 10    | 2 | 2 | 3       | 3               | 3     | 3              | 0.00132 | 2.06           | 0.81905 | 1.13  | 0.8718  | 0.88  |
| sp P24270 CATA_MOUSE         | Catalase OS=Mus musculus (Mouse) GN=C                                      | 915.52            | 6                    | 3 | 5 | 10     | 8  | 14 | 10    | 3 | 5 | 11    | 6 | 6 | 3       | 3               | 3     | 3              | 0.04811 | 2.29           | 0.51838 | 1.29  | 0.07027 | 1.64  |
| sp P99026 PSB4_MOUSE         | Proteasome subunit beta type-4 OS=Mus musculus (Mouse)                     | 536.16            | 5                    | 3 | 3 | 6      | 9  | 8  | 9     | 3 | 7 | 8     | 3 | 6 | 3       | 3               | 3     | 3              | 0.01786 | 2.09           | 0.17220 | 1.73  | 0.15307 | 1.55  |
| sp P26043 RAD1_MOUSE         | Radixin OS=Mus musculus (Mouse) GN=R                                       | 754.21            | 2                    | 3 | 4 | 6      | 6  | 6  | 7     | 1 | 3 | 5     | 4 | 3 | 3       | 3               | 3     | 3              | 0.01299 | 2.00           | 0.17371 | 1.22  | 0.12673 | 1.33  |
| sp Q0Z144 F3_MOUSE           | RAD1 cytosolic-binding protein 3 OS=Mus musculus (Mouse)                   | 429.57            | 2                    | 3 | 4 | 5      | 4  | 4  | 3     | 3 | 4 | 2     | 4 | 2 | 3       | 3               | 3     | 3              | 0.02628 | 2.00           | 0.06607 | 2.00  | 0.12628 | 1.25  |
| trjB1AWE0 B1AWE0_MOUSE       | Clahtin light chain A OS=Mus musculus (M                                   | 529.43            | 3                    | 3 | 3 | 8      | 6  | 4  | 4     | 4 | 1 | 4     | 3 | 2 | 3       | 3               | 3     | 3              | 0.02920 | 2.00           | 0.90038 | 1.00  | 0.52327 | 1.00  |
| sp Q01V7R MLP3A_MOUSE        | Microtubule-associated proteins 1A/1B light                                | 305.94            | 2                    | 3 | 3 | 4      | 6  | 6  | 3     | 2 | 5 | 5     | 1 | 4 | 3       | 3               | 3     | 3              | 0.01689 | 2.00           | 0.45354 | 1.25  | 0.47642 | 1.25  |
| sp Q08W11 THM_MOUSE          | 3-ketoadipyl-CoA thiolase, mitochondrial OS=Mus musculus (Mouse)           | 1089.63           | 3                    | 2 | 5 | 5      | 10 | 5  | 7     | 5 | 4 | 5     | 8 | 6 | 3       | 3               | 3     | 3              | 0.15926 | 2.00           | 0.12798 | 1.60  | 0.08200 | 1.90  |
| sp Q0V5H5 EMIP_MOUSE         | EMIP2-interacting protein OS=Mus musculus (Mouse)                          | 713.91            | 2                    | 2 | 3 | 5      | 6  | 3  | 3     | 4 | 2 | 4     | 2 | 3 | 3       | 3               | 3     | 3              | 0.03717 | 2.00           | 0.53454 | 2.50  | 0.05897 | 3.00  |
| sp P23931 FRIL1_MOUSE        | Femlin light chain 1 OS=Mus musculus (M                                    | 467.27            | 4                    | 4 | 1 | 4      | 4  | 10 | 8     | 2 | 5 | 5     | 1 | 3 | 3       | 3               | 3     | 3              | 0.26366 | 2.00           | 0.30556 | 1.67  | 0.85535 | 1.00  |
| sp Q09K22 NEUA_MOUSE         | N-acetylneuraminate cytidylyltransferase OS=Mus musculus (Mouse)           | 281.81            | 2                    | 3 | 1 | 3      | 4  | 6  | 3     | 2 | 2 | 5     | 4 | 3 | 3       | 3               | 3     | 3              | 0.08997 | 2.17           | 0.40700 | 1.17  | 0.50198 | 1.50  |
| sp Q0FR41 GNS_MOUSE          | N-acetylneuraminate-6-sulfatase OS=Mus musculus (Mouse)                    | 201.79            | 2                    | 2 | 1 | 4      | 3  | 5  | 2     | 2 | 3 | 2     | 3 | 2 | 3       | 3               | 3     | 3              | 0.03073 | 2.40           | 0.18911 | 1.40  | 0.03883 | 1.60  |
| sp Q0C071 AMPL_MOUSE         | Cytosol aminopeptidase OS=Mus musculus (Mouse)                             | 432.04            | 2                    | 2 | 1 | 3      | 4  | 4  | 3     | 1 | 2 | 2     | 1 | 1 | 3       | 3               | 3     | 3              | 0.00921 | 2.00           | 0.64337 | 1.00  | 0.66877 | 0.80  |
| sp Q0D005 GNAS_MOUSE         | RAD1 cytosolic-binding protein 3 OS=Mus musculus (Mouse)                   | 395.53            | 2                    | 2 | 1 | 1      | 1  | 4  | 3     | 1 | 2 | 1     | 3 | 2 | 3       | 3               | 3     | 3              | 0.02529 | 2.00           | 0.62503 | 0.80  | 0.16689 | 1.40  |
| sp P30681 HMGB2_MOUSE        | High mobility group protein B2 OS=Mus musculus (Mouse)                     | 398.21            | 5                    | 2 | 3 | 7      | 9  | 9  | 4     | 6 | 3 | 6     | 2 | 2 | 2       | 2               | 2     | 2              | 0.16740 | 2.71           | 0.62509 | 1.43  | 0.77088 | 0.71  |
| sp Q09JF8 PSP1_MOUSE         | PC4 and SFRS1-interacting protein OS=Mus musculus (Mouse)                  | 886.27            | 3                    | 3 | 3 | 3      | 4  | 6  | 7     | 1 | 1 | 4     | 1 | 1 | 2       | 3               | 3     | 3              | 0.16609 | 2.17           | 0.80039 | 1.33  | 0.91073 | 1.00  |
| sp Q0D106 EERP4_MOUSE        | Endoplasmic reticulum resident protein 44 OS=Mus musculus (Mouse)          | 450.38            | 3                    | 2 | 3 | 3      | 5  | 6  | 5     | 1 | 2 | 2     | 3 | 3 | 3       | 3               | 3     | 3              | 0.07689 | 2.80           | 0.49953 | 1.60  | 0.24052 | 1.60  |
| trjA0A0N5W5 A0A0N5W5_MOUSE   | N-acetylneuraminate cytidylyltransferase OS=Mus musculus (Mouse)           | 98.03             | 2                    | 2 | 3 | 3      | 3  | 3  | 3     | 2 | 1 | 4     | 2 | 2 | 2       | 2               | 2     | 2              | 0.07963 | 2.25           | 0.41635 | 1.50  | 0.57922 | 1.50  |
| trjA0A0N5WC3 A0A0N5WC3_MOUSE | N-acetylneuraminate cytidylyltransferase OS=Mus musculus (Mouse)           | 98.03             | 2                    | 2 | 3 | 3      | 3  | 3  | 3     | 2 | 1 | 4     | 2 | 2 | 2       | 2               | 2     | 2              | 0.07963 | 2.25           | 0.41635 | 1.50  | 0.57922 | 1.50  |
| sp Q0ZVW6 IF2A_MOUSE         | Eukaryotic translation initiation factor 2 subunit OS=Mus musculus (Mouse) | 738.34            | 2                    | 2 | 2 | 4      | 5  | 2  | 3     | 2 | 1 | 2     | 2 | 2 | 2       | 3               | 3     | 3              | 0.10592 | 2.75           | 0.58977 | 1.25  | 0.49505 | 1.25  |
| sp P97820 M4K4_MOUSE         | Mtogen-activated protein kinase kinase kinase OS=Mus musculus (Mouse)      | 539.88            | 2                    | 1 | 3 | 3      | 6  | 3  | 3     | 1 | 2 | 4     | 2 | 2 | 3       | 3               | 3     | 3              | 0.16827 | 2.00           | 0.96981 | 1.00  | 0.18683 | 1.33  |
| sp Q0JME2 MMN1_MOUSE         | Mitogen-activated protein kinase kinase kinase OS=Mus musculus (Mouse)     | 658.48            | 2                    | 1 | 3 | 5      | 4  | 3  | 3     | 1 | 2 | 5     | 2 | 2 | 2       | 3               | 3     | 3              | 0.12320 | 2.00           | 0.86981 | 1.00  | 0.30029 | 1.50  |
| sp Q0BLV1 PSMD5_MOUSE        | 26S proteasome non-ATPase regulatory subunit OS=Mus musculus (Mouse)       | 600.74            | 2                    | 1 | 2 | 2      | 2  | 3  | 3     | 2 | 2 | 4     | 1 | 2 | 2       | 2               | 2     | 2              | 0.43039 | 2.00           | 0.53408 | 1.67  | 0.60061 | 1.67  |
| sp Q07035 ATX2_MOUSE         | Ataxin-2 OS=Mus musculus (Mouse) GN=A                                      | 520.43            | 2                    | 1 | 1 | 2      | 3  | 1  | 2     | 1 | 1 | 2     | 2 | 2 | 2       | 3               | 1     | 2              | 0.31005 | 2.00           | 0.69382 | 0.67  | 0.86894 | 1.00  |
| sp Q09JY8 LPP3_MOUSE         | Lipid phosphate phosphohydrolase 3 OS=Mus musculus (Mouse)                 | 288.01            | 2                    | 1 | 1 | 1      | 4  | 2  | 2     | 1 | 2 | 2     | 2 | 2 | 2       | 2               | 2     | 2              | 0.28706 | 2.33           | 0.97943 | 1.00  | 0.72684 | 0.67  |
| sp Q0JK48 SHL1_MOUSE         | Endophilin-B1 OS=Mus musculus (Mouse)                                      | 459.95            | 1                    | 2 | 1 | 1      | 2  | 5  | 2     | 2 | 2 | 2     | 1 | 1 | 2       | 3               | 1     | 3              | 0.29559 | 2.67           | 0.73981 | 0.67  | 0.49632 | 1.33  |
| sp Q09J99 THM_MOUSE          | 3-ketoadipyl-CoA thiolase, mitochondrial OS=Mus musculus (Mouse)           | 1089.63           | 3                    | 2 | 5 | 5      | 10 | 5  | 7     | 5 | 4 | 5     | 8 | 6 | 3       | 3               | 3     | 3              | 0.15926 | 2.00           | 0.12798 | 1.60  | 0.08200 | 1.90  |
| sp P23931 FRIL1_MOUSE        | Femlin light chain 1 OS=Mus musculus (M                                    | 467.27            | 4                    | 4 | 1 | 4      | 4  | 10 | 8     | 2 | 5 | 5     | 1 | 3 | 3       | 3               | 3     | 3              | 0.26366 | 2.00           | 0.30556 | 1.67  | 0.85535 | 1.00  |
| sp Q09K22 NEUA_MOUSE         | N-acetylneuraminate cytidylyltransferase OS=Mus musculus (Mouse)           | 281.81            | 2                    | 3 | 1 | 3      | 4  | 6  | 3     | 2 | 2 | 5     | 4 | 3 | 3       | 3               | 3     | 3              | 0.08997 | 2.17           | 0.40700 | 1.17  | 0.50198 | 1.50  |
| sp Q0FR41 GNS_MOUSE          | N-acetylneuraminate-6-sulfatase OS=Mus musculus (Mouse)                    | 201.79            | 2                    | 2 | 1 | 4      | 3  | 5  | 2     | 2 | 3 | 2     | 3 | 2 | 3       | 3               | 3     | 3              | 0.03073 | 2.40           | 0.18911 | 1.40  | 0.03883 | 1.60  |
| sp Q0C071 AMPL_MOUSE         | Cytosol aminopeptidase OS=Mus musculus (Mouse)                             | 432.04            | 2                    | 2 | 1 | 3      | 4  | 4  | 3     | 1 | 2 | 2     | 1 | 1 | 3       | 3               | 3     | 3              | 0.00921 | 2.00           | 0.64337 | 1.00  | 0.66877 | 0.80  |
| sp Q0D005 GNAS_MOUSE         | RAD1 cytosolic-binding protein 3 OS=Mus musculus (Mouse)                   | 395.53            | 2                    | 2 | 1 | 1      | 1  | 4  | 3     | 1 | 2 | 1     | 3 | 2 | 3       | 3               | 3     | 3              | 0.02529 | 2.00           | 0.62503 | 0.80  | 0.16689 |       |

| accession                     | description                                                | protein_set_score | 1 | 2 | 3 | 1 | 2 | 3 | 1 | 2 | 3 | 1 | 2 | 3 | WT | KI-93 | KI-82 | pvalue  | ratio   | pvalue  | ratio   | pvalue  | ratio               |                     |      |
|-------------------------------|------------------------------------------------------------|-------------------|---|---|---|---|---|---|---|---|---|---|---|---|----|-------|-------|---------|---------|---------|---------|---------|---------------------|---------------------|------|
| trjQ3U6W2 Q3U6W2_MOUSE        | Putative uncharacterized protein OS=Mus musculus           | 221.34            |   | 3 |   | 3 | 3 | 1 |   | 1 | 1 |   |   |   | 1  | 3     | 2     | 1       | 0.33495 | 2.33    | 0.80603 | 0.67    | 0.62696             | 0.33                |      |
| sp Q90W5 PPPL1_MOUSE          | Peptidyl-prolyl cis-trans isomerase-like 1 OS=Mus musculus | 116.46            |   | 2 |   | 3 | 1 | 1 |   | 3 |   |   |   |   | 1  | 3     | 0     | 0.35803 | 2.50    | 0.80384 | 1.50    | 0.37390 | WT- <i>scr</i> only | 0.50                |      |
| sp Q8C74 TCAL5_MOUSE          | Transcription elongation factor A protein-like             | 213.39            |   | 2 |   | 3 | 1 | 1 |   | 2 |   | 2 | 1 |   | 1  | 3     | 2     | 1       | 0.55803 | 2.50    | 0.80384 | 1.50    | 0.37390             | WT- <i>scr</i> only | 0.50 |
| sp Q90W5 DCTN6_MOUSE          | Dactin subunit 6 OS=Mus musculus (Mox)                     | 105.14            |   | 1 | 2 | 2 | 2 | 2 |   | 2 | 2 | 1 | 1 |   | 2  | 3     | 2     | 1       | 0.20621 | 2.00    | 0.99928 | 1.00    | 0.37685             | 0.33                |      |
| sp Q8DC16 ERG1_MOUSE          | Endoplasmic reticulum-Golgi intermediate c                 | 316.43            |   | 1 | 1 | 1 | 2 | 2 |   | 1 | 2 |   |   |   | 2  | 3     | 2     | 0       | 0.10526 | 2.50    | 0.56688 | 1.50    | 0.11658             | WT- <i>scr</i> only | 0.50 |
| sp P56387 DYL3_MOUSE          | Dynein light chain Tctex-type 3 OS=Mus musculus            | 202.31            |   | 1 | 1 | 1 | 2 | 1 |   | 1 | 2 |   |   |   | 1  | 3     | 1     | 0       | 0.09274 | 4.00    | 0.99012 | 1.00    | 0.37390             | WT- <i>scr</i> only | 0.50 |
| sp P55802 TB10A_MOUSE         | TBC1 domain family member 10A OS=Mus musculus              | 53.07             |   | 1 | 1 | 1 | 1 | 1 |   | 1 | 1 |   |   |   | 1  | 2     | 0     | 0       | 0.52048 | 2.00    | 0.99012 | 1.00    | 0.37390             | WT- <i>scr</i> only | 0.50 |
| sp Q8Q071 NEBL_MOUSE          | UIM-binding domain-containing Nebulette                    | 170.97            |   | 1 | 1 | 1 | 1 | 1 |   | 1 | 1 |   |   |   | 1  | 2     | 0     | 0       | 0.52048 | 2.00    | 0.99012 | 1.00    | 0.37390             | WT- <i>scr</i> only | 0.50 |
| trj AA0A0YX97 AA0A0YX97_MOUSE | N-terminal Xaa-Pro-Lys-N-methyltransferase                 | 70.32             |   | 1 | 1 | 1 | 1 | 1 |   | 1 | 1 |   |   |   | 1  | 2     | 1     | 0       | 0.54185 | 2.00    | 0.99012 | 1.00    | 0.37390             | WT- <i>scr</i> only | 0.50 |
| sp P50422 ARSA_MOUSE          | Arylsulfatase A OS=Mus musculus (Mouse)                    | 64.57             |   | 1 | 1 | 1 | 1 | 1 |   | 1 | 1 |   |   |   | 1  | 2     | 1     | 0       | 0.54185 | 2.00    | 0.99012 | 1.00    | 0.37390             | WT- <i>scr</i> only | 0.50 |
| trj E5CXC4 E5CXC4_MOUSE       | Protein Poch1 OS=Mus musculus (Mouse)                      | 283.94            |   | 1 | 1 | 1 | 1 | 1 |   | 1 | 1 |   |   |   | 1  | 2     | 1     | 0       | 0.54185 | 2.00    | 0.99012 | 1.00    | 0.37390             | WT- <i>scr</i> only | 0.50 |
| sp Q8CJ61 CKLF4_MOUSE         | CKLF-like MARVEL transmembrane domain                      | 51.65             |   | 1 | 1 | 1 | 1 | 1 |   | 1 | 1 |   |   |   | 1  | 3     | 1     | 0       | 0.15088 | 3.00    | 0.95400 | 1.00    | 0.37390             | WT- <i>scr</i> only | 0.50 |
| trj Q3TF85 Q3TF85_MOUSE       | Putative uncharacterized protein OS=Mus musculus           | 211.6             |   | 1 | 1 | 1 | 1 | 1 |   | 1 | 1 |   |   |   | 1  | 2     | 1     | 0       | 0.58510 | 2.00    | 0.96663 | 1.00    | 0.37390             | WT- <i>scr</i> only | 0.50 |

### Proteins mostly identified in the KI-93 sample with ratio>2:

| accession               | description                                              | protein_set_score | Exp. from 01/02/2017           |       |       |       |         |       |       |       |                        |       |        |       | Exp. 01/02/2017        |       |        |         |      |         |      |         |      |  |  |  |
|-------------------------|----------------------------------------------------------|-------------------|--------------------------------|-------|-------|-------|---------|-------|-------|-------|------------------------|-------|--------|-------|------------------------|-------|--------|---------|------|---------|------|---------|------|--|--|--|
|                         |                                                          |                   | BASIC Spectral Count (Proline) |       |       |       | # Repl. |       |       |       | KI-93 / WT- <i>scr</i> |       |        |       | KI-82 / WT- <i>scr</i> |       |        |         |      |         |      |         |      |  |  |  |
|                         |                                                          |                   | WT                             | KI-93 | KI-82 | ratio | WT      | KI-93 | KI-82 | ratio | pvalue                 | ratio | pvalue | ratio | pvalue                 | ratio | pvalue | ratio   |      |         |      |         |      |  |  |  |
| sp Q16680 ANX_MOUSE     | Alpha-intensin OS=Mus musculus (Mouse)                   | 1309.38           | 6                              | 5     | 3     | 5     | 7       | 6     | 21    | 12    | 12                     | 6     | 5      | 6     | 3                      | 3     | 3      | 0.32889 | 1.29 | 0.83896 | 3.00 | 0.12931 | 2.21 |  |  |  |
| sp Q91W50 CSD1_MOUSE    | CGD58 iron-sulfur domain-containing protein              | 404.67            | 2                              | 4     | 3     | 3     | 6       | 8     | 5     | 7     | 6                      | 2     | 6      | 3     | 3                      | 3     | 3      | 0.16887 | 1.89 | 0.00890 | 2.22 | 0.21518 | 1.56 |  |  |  |
| sp P31938 MP2K4_MOUSE   | Dual specificity mitogen-activated protein kinase        | 571.47            | 2                              | 2     | 4     | 3     | 5       | 4     | 6     | 5     | 5                      | 2     | 3      | 4     | 3                      | 3     | 3      | 0.26088 | 1.50 | 0.01534 | 2.00 | 0.50356 | 1.13 |  |  |  |
| trj Q3U6W2 Q3U6W2_MOUSE | Putative uncharacterized protein OS=Mus musculus         | 569.7             | 2                              | 2     | 1     | 2     | 1       | 7     | 2     | 5     | 2                      | 1     | 1      | 3     | 3                      | 3     | 3      | 0.89897 | 1.00 | 0.07916 | 2.80 | 0.68877 | 0.80 |  |  |  |
| sp P56387 DYL3_MOUSE    | Cytochrome c oxidase subunit 6B1 OS=Mus musculus         | 219.9             | 2                              | 1     | 1     | 2     | 2       | 2     | 5     | 1     | 2                      | 3     | 2      | 3     | 3                      | 3     | 3      | 0.17262 | 1.50 | 0.34593 | 2.00 | 0.09596 | 1.75 |  |  |  |
| sp P28741 WIFA_MOUSE    | Winged domain protein KIAA0101 OS=Mus musculus           | 348.42            | 2                              | 1     | 1     | 1     | 2       | 3     | 2     | 1     | 1                      | 1     | 1      | 1     | 1                      | 1     | 1      | 0.70279 | 1.33 | 0.27166 | 2.00 | 0.71947 | 0.25 |  |  |  |
| sp Q8BFU3 RIN214_MOUSE  | RING finger protein 214 OS=Mus musculus                  | 190.4             | 2                              | 1     | 1     | 1     | 2       | 2     | 2     | 2     | 1                      | 1     | 1      | 1     | 2                      | 2     | 3      | 0.95265 | 1.00 | 0.17399 | 2.00 | 0.73746 | 0.67 |  |  |  |
| sp Q3UGC7 E13A_MOUSE    | Eukaryotic translation initiation factor 3 subunit 3     | 333.19            | 2                              | 2     | 1     | 2     | 2       | 5     | 1     | 2     | 2                      | 2     | 2      | 2     | 2                      | 2     | 2      | 0.61288 | 1.67 | 0.56615 | 2.00 | 0.63223 | 1.33 |  |  |  |
| sp Q81187 TIS101_MOUSE  | Tumor suppressor like factor 101 protein OS=Mus musculus | 267.37            | 2                              | 1     | 1     | 2     | 2       | 3     | 2     | 2     | 2                      | 2     | 2      | 2     | 1                      | 2     | 3      | 0.72196 | 0.67 | 0.13662 | 2.00 | 0.51755 | 1.33 |  |  |  |
| sp Q8H565 TRPL_MOUSE    | TRP-like protein OS=Mus musculus (Mouse) GNF-1           | 39.96             | 2                              | 1     | 1     | 2     | 2       | 3     | 2     | 2     | 3                      | 1     | 1      | 1     | 1                      | 2     | 1      | 0.99759 | 1.00 | 0.46107 | 2.00 | 0.92929 | 1.00 |  |  |  |
| sp P32020 NLTP_MOUSE    | Non-specific lipid-transfer protein OS=Mus musculus      | 303.49            | 2                              | 1     | 1     | 2     | 3       | 3     | 1     | 1     | 1                      | 1     | 1      | 1     | 1                      | 2     | 3      | 0.77885 | 1.50 | 0.31339 | 2.50 | 0.94727 | 1.00 |  |  |  |
| sp P28474 ADHX_MOUSE    | Alcohol dehydrogenase class-3 OS=Mus musculus            | 639.42            | 1                              | 2     | 2     | 1     | 3       | 4     | 4     | 2     | 5                      | 3     | 5      | 3     | 3                      | 3     | 2      | 0.38920 | 1.60 | 0.09129 | 2.20 | 0.49592 | 1.60 |  |  |  |
| trj D320V2 D320V2_MOUSE | Rho guanine nucleotide exchange factor 7                 | 470.12            | 1                              | 2     | 1     | 1     | 2       | 3     | 5     | 3     | 3                      | 4     | 2      | 3     | 2                      | 2     | 2      | 0.40372 | 1.50 | 0.37500 | 2.00 | 0.48860 | 1.50 |  |  |  |
| sp Q8B952 INTC_MOUSE    | Protein Intc-7 homolog C OS=Mus musculus                 | 398.28            | 1                              | 3     | 2     | 2     | 5       | 2     | 2     | 2     | 2                      | 2     | 2      | 2     | 3                      | 2     | 2      | 0.73944 | 0.75 | 0.10666 | 2.25 | 0.85769 | 1.00 |  |  |  |
| sp Q8B220 LRG5_MOUSE    | Leucine-rich repeat-containing protein 59 C              | 538.19            | 1                              | 1     | 5     | 5     | 3       | 3     | 6     | 3     | 5                      | 4     | 2      | 3     | 3                      | 3     | 3      | 0.50272 | 1.57 | 0.18854 | 2.00 | 0.54894 | 1.29 |  |  |  |
| sp Q8BL86 MBL2_MOUSE    | Metallo-beta-lactamase domain-containing protein 2       | 309.08            | 1                              | 1     | 1     | 2     | 2       | 1     | 2     | 3     | 1                      | 1     | 1      | 1     | 1                      | 3     | 3      | 0.97067 | 1.00 | 0.11557 | 3.00 | 0.22632 | 1.50 |  |  |  |
| sp A2AN08 UBR4_MOUSE    | E3 ubiquitin-protein ligase UBR4 OS=Mus musculus         | 623.68            | 1                              | 2     | 1     | 2     | 1       | 2     | 5     | 2     | 2                      | 2     | 2      | 2     | 2                      | 3     | 3      | 0.73911 | 1.33 | 0.11638 | 3.00 | 0.70616 | 0.67 |  |  |  |
| sp P26369 UZAF2_MOUSE   | Splicing factor UZAF 65 kDa subunit OS=Homo sapiens      | 280.7             | 1                              | 1     | 1     | 1     | 1       | 2     | 2     | 1     | 1                      | 1     | 1      | 1     | 1                      | 2     | 1      | 0.99759 | 1.00 | 0.36273 | 3.00 | 0.91525 | 1.00 |  |  |  |
| sp Q8JUX4 CIN4_MOUSE    | Apoecytic chromatin remodeling inducer 1                 | 94.28             | 1                              | 1     | 1     | 1     | 1       | 1     | 2     | 1     | 1                      | 1     | 1      | 1     | 1                      | 1     | 1      | 0.99759 | 1.00 | 0.46107 | 2.00 | 0.92929 | 1.00 |  |  |  |
| trj Q8D49 Q8D49_MOUSE   | RAB23, member RAS oncogene family, isoform 1             | 258.62            | 1                              | 1     | 1     | 1     | 1       | 2     | 1     | 1     | 1                      | 1     | 1      | 1     | 1                      | 1     | 1      | 0.94510 | 1.00 | 0.70178 | 2.00 | 0.99229 | 1.00 |  |  |  |
| sp Q8Z2W9 GRIA3_MOUSE   | GluTamate receptor 3 OS=Mus musculus (Mox)               | 294.11            | 1                              | 2     | 1     | 2     | 1       | 1     | 1     | 3     | 1                      | 1     | 1      | 1     | 1                      | 1     | 2      | 0.96500 | 1.00 | 0.50267 | 2.00 | 0.99229 | 1.00 |  |  |  |
| sp Q8D2R0 AACCS_MOUSE   | Acetoacetyl-CoA synthetase OS=Mus musculus               | 277.3             | 1                              | 2     | 1     | 1     | 2       | 1     | 1     | 3     | 1                      | 1     | 1      | 1     | 1                      | 2     | 3      | 0.75963 | 1.50 | 0.31473 | 2.50 | 0.58254 | 1.50 |  |  |  |
| sp Q89709 PFBP_MOUSE    | Pf18-mRNP-processing splicing factor 7 OS=Mus musculus   | 480.33            | 1                              | 1     | 1     | 1     | 1       | 1     | 2     | 1     | 1                      | 1     | 1      | 1     | 2                      | 3     | 2      | 0.43345 | 1.50 | 0.16884 | 2.00 | 0.85294 | 1.00 |  |  |  |
| sp P42155 SMD1_MOUSE    | Small nuclear ribonucleoprotein Sm D1 OS=Mus musculus    | 99.72             | 1                              | 1     | 1     | 1     | 1       | 1     | 2     | 1     | 1                      | 1     | 1      | 1     | 1                      | 1     | 1      | 0.94455 | 1.50 | 0.16884 | 2.00 | 0.85294 | 1.00 |  |  |  |
| trj Q8Z3F1 Q8Z3F1_MOUSE | Chloride channel, nucleotide-sensitive, 1A               | 165.86            | 1                              | 1     | 1     | 1     | 2       | 2     | 1     | 1     | 1                      | 1     | 1      | 1     | 1                      | 2     | 2      | 0.69611 | 1.50 | 0.16884 | 2.00 | 0.79865 | 1.00 |  |  |  |
| sp Q8U0M3 NAA15_MOUSE   | N-alpha-acetyltransferase 15, NATA auxiliary             | 336.49            | 1                              | 1     | 1     | 1     | 2       | 3     | 1     | 1     | 2                      | 1     | 1      | 1     | 2                      | 2     | 2      | 0.96289 | 1.00 | 0.50782 | 2.00 | 0.57240 | 1.50 |  |  |  |
| sp Q9WU7 UCHL5_MOUSE    | Ubiquitin carboxyl-terminal hydrolase isozyme 5          | 225.56            | 1                              | 1     | 1     | 1     | 1       | 1     | 1     | 1     | 1                      | 1     | 1      | 1     | 1                      | 1     | 1      | 0.97304 | 1.00 | 0.48634 | 2.00 | 0.89145 | 1.00 |  |  |  |
| sp Q17703 ROBO2_MOUSE   | Roundabout homolog 2 OS=Mus musculus                     | 114.5             | 1                              | 1     | 1     | 1     | 1       | 1     | 1     | 1     | 1                      | 1     | 1      | 1     | 1                      | 1     | 1      | 0.96551 | 1.00 | 0.54186 | 2.00 | 0.89145 | 1.00 |  |  |  |
| sp Q8BLR2 CPNE4_MOUSE   | Copine-4 OS=Mus musculus (Mouse) GNF-1                   | 414.86            | 1                              | 4     | 2     | 3     | 1       | 3     | 3     | 2     | 2                      | 2     | 2      | 1     | 3                      | 3     | 3      | 0.73910 | 1.50 | 0.36767 | 2.00 | 0.73963 | 1.25 |  |  |  |
| sp Q9W80 SNX1_MOUSE     | Sorting nexin-1 OS=Mus musculus (Mouse) GNF-1            | 336.04            | 1                              | 3     | 2     | 2     | 2       | 1     | 2     | 3     | 3                      | 1     | 1      | 1     | 1                      | 2     | 3      | 0.87320 | 1.33 | 0.40821 | 2.00 | 0.80656 | 0.67 |  |  |  |
| sp P48036 ANXA5_MOUSE   | Annexin A5 OS=Mus musculus (Mouse) GNF-1                 | 365.26            | 1                              | 1     | 1     | 1     | 1       | 3     | 1     | 2     | 3                      | 1     | 1      | 1     | 1                      | 2     | 1      | 0.99076 | 1.00 | 0.33742 | 4.00 | 0.90433 | 1.00 |  |  |  |
| sp Q8B70 CPNE3_MOUSE    | CPNE-3 OS=Mus musculus (Mouse) GNF-1                     | 86.54             | 1                              | 1     | 1     | 1     | 1       | 1     | 1     | 2     | 1                      | 1     | 1      | 1     | 1                      | 1     | 1      | 0.95341 | 1.00 | 0.34732 | 3.00 | 0.52666 | 1.00 |  |  |  |

### Proteins mostly identified in the KI-82 sample with ratio>2:

| accession              | description                                      | protein_set_score | Exp. from 01/02/2017           |       |       |       |         |       |       |       |                        |       |        |       | Exp. 01/02/2017        |       |        |         |      |         |      |         |      |  |  |  |
|------------------------|--------------------------------------------------|-------------------|--------------------------------|-------|-------|-------|---------|-------|-------|-------|------------------------|-------|--------|-------|------------------------|-------|--------|---------|------|---------|------|---------|------|--|--|--|
|                        |                                                  |                   | BASIC Spectral Count (Proline) |       |       |       | # Repl. |       |       |       | KI-93 / WT- <i>scr</i> |       |        |       | KI-82 / WT- <i>scr</i> |       |        |         |      |         |      |         |      |  |  |  |
|                        |                                                  |                   | WT                             | KI-93 | KI-82 | ratio | WT      | KI-93 | KI-82 | ratio | pvalue                 | ratio | pvalue | ratio | pvalue                 | ratio | pvalue | ratio   |      |         |      |         |      |  |  |  |
| sp P04493 HPT_MOUSE    | Hypoxanthine-guanine phosphoribosyltransferase   | 528.96            | 2                              | 2     | 2     | 1     | 4       | 4     | 3     | 2     | 1                      | 4     | 4      | 5     | 3                      | 3     | 3      | 0.42039 | 1.50 | 0.90182 | 1.00 | 0.00659 | 2.17 |  |  |  |
| sp Q31DR9 Q31DR9_MOUSE | Putative uncharacterized protein OS=Mus musculus | 387.75            | 2                              | 1     | 1     | 1     | 2       | 2     | 2     | 2     | 2                      | 1     | 3      | 1     | 2                      | 1     | 3      | 0.76648 | 1.50 | 0.95504 | 1.00 | 0.71290 | 3.00 |  |  |  |
| sp Q8U0G5 SEPT9_MOUSE  | Septin-9 OS=Mus musculus (Mouse) GNF-5           | 455.56            | 1                              | 1     | 1     | 1     | 1       | 2     | 2     | 2     | 2                      | 3     | 1      | 1     | 2                      | 1     | 2      | 0.96818 | 1.00 | 0.90504 | 1.00 | 0.39059 | 2.50 |  |  |  |
| sp Q8O579 EMO_MOUSE    | Emerin OS=Mus musculus (Mouse) GNF-En            | 180.69            | 1                              | 1     | 1     | 3     | 1       | 1     | 1     | 2     | 2                      |       |        |       |                        |       |        |         |      |         |      |         |      |  |  |  |

Proteins mostly identified in the WT-scr sample with ratio>2:

| accession              | description                                  | protein_set_score | Exp. from 01/02/2017 |   |   |   |        |   |   |   |       |   |   |   | # Rep. | Exp. 01/02/2017 |         |                |         |             |         |             |      |
|------------------------|----------------------------------------------|-------------------|----------------------|---|---|---|--------|---|---|---|-------|---|---|---|--------|-----------------|---------|----------------|---------|-------------|---------|-------------|------|
|                        |                                              |                   | WT                   |   |   |   | K1-scr |   |   |   | K1-93 |   |   |   |        | K1-scr / WT-scr |         | K1-93 / WT-scr |         |             |         |             |      |
|                        |                                              |                   | 1                    | 2 | 3 | 1 | 2      | 3 | 1 | 2 | 3     | 1 | 2 | 3 |        | WT              | K1-scr  | ratio          | WT      | K1-93       | ratio   |             |      |
| sp Q1584 FXR1_MOUSE    | Fragile X mental retardation syndrome-relat  | 385.27            | 4                    | 5 | 4 | 2 | 2      | 2 | 2 | 1 | 3     | 2 | 1 | 3 | 3      | 3               | 2       | 0.0008         | 0.46    | 0.03085     | 0.46    | 0.00670     | 0.23 |
| sp Q8BIE6 FRMA_MOUSE   | FERM domain-containing protein 4A OS=M       | 428.9             | 2                    | 3 | 3 | 3 | 1      | 2 | 1 | 1 | 1     | 1 | 1 | 3 | 2      | 3               | 2       | 0.23025        | 0.50    | 0.03679     | 0.50    | 0.01711     | 0.25 |
| sp Q92254 PDE2A_MOUSE  | cGMP-dependent 3',5'-cyclic phosphodiester   | 988.71            | 4                    | 3 | 3 | 3 | 1      | 3 | 1 | 3 | 2     | 3 | 3 | 2 | 2      | 2               | 0.11045 | 0.40           | 0.08785 | 0.40        | 0.19818 | 0.50        |      |
| sp Q0KL02 TRIO_MOUSE   | Triple functional domain protein OS=Musc     | 908.7             | 2                    | 4 | 2 | 2 | 1      | 1 | 1 | 1 | 2     | 1 | 1 | 3 | 2      | 1               | 3       | 0.10470        | 0.38    | 0.03216     | 0.38    | 0.14884     | 0.50 |
| sp P61937 INTF2_MOUSE  | Nuclear transport factor 2 OS=Mus muscu      | 192.49            | 3                    | 3 | 2 | 2 | 2      | 2 | 2 | 1 | 2     | 2 | 2 | 2 | 2      | 1               | 0.13305 | 0.50           | 0.03300 | 0.50        | 0.05177 | 0.25        |      |
| sp P35922 FMRI_MOUSE   | Fragile X mental retardation protein 1 homo  | 352.01            | 5                    | 3 | 2 | 1 | 2      | 1 | 1 | 1 | 1     | 1 | 1 | 3 | 3      | 1               | 2       | 0.09015        | 0.40    | 0.03673     | 0.10    | 0.05527     | 0.20 |
| tr A2AJ7 A2AJ72_MOUSE  | MC6130458 OS=Mus musculus (Mouse) G          | 328.13            | 3                    | 3 | 1 | 2 | 1      | 1 | 1 | 1 | 1     | 1 | 1 | 3 | 1      | 3               | 2       | 0.15360        | 0.29    | 0.12395     | 0.43    | 0.11812     | 0.29 |
| sp Q0AK09 PHF14_MOUSE  | 14 kDa phosphoinositide phosphatase OS       | 347.93            | 2                    | 3 | 1 | 1 | 1      | 1 | 1 | 1 | 1     | 2 | 1 | 3 | 1      | 1               | 0.09923 | 0.33           | 0.06798 | 0.17        | 0.19755 | 0.33        |      |
| sp Q0C996 TM163_MOUSE  | Transmembrane protein 163 OS=Mus mus         | 136.74            | 2                    | 2 | 1 | 1 | 1      | 1 | 1 | 1 | 1     | 1 | 1 | 2 | 1      | 1               | 0.25703 | 0.25           | 0.04227 | 0.50        | 0.25286 | 0.25        |      |
| sp Q0L456 QDE1_MOUSE   | Cyclic-nucleoside diphosphodiesterase        | 167.97            | 3                    | 1 | 2 | 1 | 2      | 1 | 1 | 1 | 1     | 1 | 1 | 3 | 2      | 1               | 0.24833 | 0.50           | 0.07761 | 0.37        | 0.09191 | 0.17        |      |
| sp B9EJA2 CTTB2_MOUSE  | Cortactin-binding protein 2 OS=Mus muscu     | 402.27            | 2                    | 1 | 1 | 1 | 1      | 1 | 1 | 1 | 1     | 1 | 1 | 3 | 2      | 1               | 0.21150 | 0.50           | 0.09239 | 0.25        | 0.10176 | 0.25        |      |
| sp P63248 PKA_MOUSE    | cAMP-dependent protein kinase inhibitor a    | 143.27            | 2                    | 1 | 1 | 1 | 1      | 1 | 1 | 1 | 1     | 1 | 1 | 3 | 2      | 2               | 0.22060 | 0.50           | 0.24653 | 0.50        | 0.10176 | 0.25        |      |
| sp Q0R5H1 UBP15_MOUSE  | Ubiquitin carboxyl-terminal hydrolase 15 OS  | 83.16             | 2                    | 1 | 1 | 1 | 1      | 1 | 1 | 1 | 1     | 1 | 1 | 1 | 0      | 0               | 0.38533 | 0.33           | 0.16333 | 0.33        | 0.16333 | WT-scr only |      |
| sp Q0Q272 GPC1_MOUSE   | Colicoid domain-containing protein 177 C     | 155.85            | 2                    | 1 | 1 | 1 | 1      | 1 | 1 | 1 | 1     | 1 | 1 | 1 | 1      | 1               | 0.35241 | 0.33           | 0.26361 | 0.33        | 0.46129 | 0.33        |      |
| sp Q0Z218 SUCB2_MOUSE  | Succinyl-CoA ligase [GDP-forming] subunit 1  | 122.85            | 2                    | 2 | 1 | 1 | 1      | 1 | 1 | 1 | 1     | 1 | 1 | 1 | 1      | 0               | 0.67949 | 0.50           | 0.65549 | 0.50        | 0.37900 | WT-scr only |      |
| sp Q0CC85 PABP2_MOUSE  | Polyadenylate-binding protein 2 OS=Mus m     | 171.28            | 2                    | 2 | 1 | 1 | 1      | 1 | 1 | 1 | 1     | 1 | 1 | 1 | 1      | 1               | 0.67949 | 0.50           | 0.72317 | 0.50        | 0.75820 | 0.50        |      |
| sp Q3UJH6 WNK2_MOUSE   | Serine/threonine-protein kinase WNK2 OS=     | 114.95            | 2                    | 2 | 1 | 1 | 1      | 1 | 1 | 1 | 1     | 1 | 1 | 1 | 1      | 0               | 0.64280 | 0.50           | 0.72317 | 0.50        | 0.37900 | WT-scr only |      |
| sp Q0JKN6 NOVA1_MOUSE  | RNA-binding protein Nova-1 OS=Mus muscu      | 174.86            | 2                    | 2 | 1 | 1 | 1      | 1 | 1 | 1 | 1     | 1 | 1 | 1 | 0      | 0               | 0.64280 | 0.50           | 0.37900 | WT-scr only | 0.73999 | WT-scr only |      |
| sp Q0AKM3 OXRI_MOUSE   | Oxidation resistance protein 1 OS=Mus mu     | 240.26            | 2                    | 2 | 1 | 1 | 1      | 1 | 1 | 1 | 1     | 1 | 1 | 1 | 0      | 0               | 0.37900 | WT-scr only    | 0.72317 | 0.50        | 0.37900 | WT-scr only |      |
| sp Q0Y0A9 CNKR2_MOUSE  | Connector enhancer of kinase suppressor C    | 160.91            | 2                    | 2 | 1 | 1 | 1      | 1 | 1 | 1 | 1     | 1 | 1 | 1 | 0      | 0               | 0.37900 | WT-scr only    | 0.37900 | 0.50        | 0.62723 | 0.50        |      |
| sp Q01VE0 S274_MOUSE   | Long-chain fatty acid transport protein 4 C  | 452.26            | 1                    | 3 | 5 | 3 | 1      | 1 | 1 | 1 | 1     | 1 | 3 | 2 | 1      | 2               | 0.27070 | 0.33           | 0.23817 | 0.33        | 0.19096 | 0.11        |      |
| sp Q092X9 NLGN2_MOUSE  | Neurigin-2 OS=Mus musculus (Mouse) G         | 305.09            | 1                    | 2 | 2 | 1 | 1      | 1 | 1 | 1 | 1     | 1 | 3 | 2 | 0      | 0               | 0.08162 | 0.40           | 0.00731 | WT-scr only | 0.00731 | WT-scr only |      |
| sp Q3UJH6 CO177_MOUSE  | Coiled-coil domain-containing protein 177 C  | 119.53            | 1                    | 2 | 1 | 1 | 1      | 1 | 1 | 1 | 1     | 1 | 1 | 1 | 0      | 0               | 0.01892 | 0.33           | 0.01892 | 0.33        | 0.01892 | WT-scr only |      |
| sp Q0C8D3 VCP1_MOUSE   | Deubiquitinating protein VCP1/315 OS=Mus     | 166.04            | 1                    | 2 | 1 | 1 | 1      | 1 | 1 | 1 | 1     | 1 | 1 | 2 | 1      | 0               | 0.38072 | 0.33           | 0.15344 | WT-scr only | 0.45970 | 0.33        |      |
| sp P63248 TBCD_MOUSE   | Tubulin-specific chaperone D OS=Mus mus      | 353.14            | 1                    | 2 | 1 | 1 | 1      | 1 | 1 | 1 | 1     | 1 | 1 | 2 | 0      | 1               | 0.15344 | 0.33           | 0.15344 | 0.33        | 0.15344 | WT-scr only |      |
| tr P70245 EBP_MOUSE    | 3-beta-hydroxysteroid-Delta(8),Delta(7)stero | 47.77             | 1                    | 1 | 1 | 1 | 1      | 1 | 1 | 1 | 1     | 1 | 1 | 3 | 1      | 1               | 0.12156 | 0.33           | 0.09556 | 0.33        | 0.00000 | WT-scr only |      |
| sp Q0P610 SNR40_MOUSE  | US 53kDa nuclear ribonucleoprotein A04 kb    | 55.32             | 1                    | 1 | 1 | 1 | 1      | 1 | 1 | 1 | 1     | 1 | 1 | 1 | 0      | 0               | 0.53515 | 0.50           | 0.49429 | 0.50        | 0.11633 | WT-scr only |      |
| tr F59P89 PVP_MOUSE    | Protein Zc378 OS=Mus musculus (Mouse)        | 55.32             | 1                    | 1 | 1 | 1 | 1      | 1 | 1 | 1 | 1     | 1 | 1 | 1 | 0      | 0               | 0.53515 | 0.50           | 0.49429 | 0.50        | 0.11633 | WT-scr only |      |
| sp Q11136 PEPD_MOUSE   | Xaa-Pro dipeptidase OS=Mus musculus (M       | 365.02            | 1                    | 1 | 1 | 1 | 1      | 1 | 1 | 1 | 1     | 1 | 1 | 2 | 1      | 1               | 0.53515 | 0.50           | 0.60884 | 0.50        | 0.66668 | 0.50        |      |
| sp Q0D7A8 ARMC1_MOUSE  | Armadillo repeat-containing protein 1 OS=    | 106.85            | 1                    | 1 | 1 | 1 | 1      | 1 | 1 | 1 | 1     | 1 | 1 | 2 | 1      | 1               | 0.53515 | 0.50           | 0.60884 | 0.50        | 0.66668 | 0.50        |      |
| tr Q7CB97 FCB97_MOUSE  | CAP-Gly domain-containing linker protein 1   | 201.92            | 1                    | 1 | 1 | 1 | 1      | 1 | 1 | 1 | 1     | 1 | 1 | 2 | 1      | 1               | 0.47270 | 0.50           | 0.49429 | 0.50        | 0.52365 | 0.50        |      |
| sp Q0SS3M RH44_MOUSE   | RhoGAP-activating protein 4 OS=Mus muscu     | 336.94            | 1                    | 1 | 1 | 1 | 1      | 1 | 1 | 1 | 1     | 1 | 1 | 1 | 0      | 0               | 0.47270 | 0.50           | 0.49429 | 0.50        | 0.52365 | 0.50        |      |
| sp Q09KN9 EPN4_MOUSE   | Clastrin interactor 1 OS=Mus musculus (M     | 164.74            | 1                    | 1 | 1 | 1 | 1      | 1 | 1 | 1 | 1     | 1 | 1 | 1 | 0      | 0               | 0.49625 | 0.50           | 0.11633 | WT-scr only | 0.11633 | WT-scr only |      |
| sp Q0F2E8 TAOK1_MOUSE  | Serine/threonine-protein kinase TAO1 OS=     | 69.25             | 1                    | 1 | 1 | 1 | 1      | 1 | 1 | 1 | 1     | 1 | 1 | 1 | 0      | 0               | 0.11633 | WT-scr only    | 0.35219 | 0.33        | 0.06379 | 0.50        |      |
| sp Q0P9U7 INW02_MOUSE  | NACHT and WD repeat domain-containing p      | 154.86            | 1                    | 1 | 2 | 1 | 1      | 1 | 1 | 1 | 1     | 1 | 1 | 1 | 1      | 0               | 0.13416 | 0.33           | 0.16219 | 0.33        | 0.44622 | 0.33        |      |
| sp Q0B712 S4AT_MOUSE   | Sodium bicarbonate cotransporter 3 OS=M      | 55.15             | 1                    | 1 | 1 | 1 | 1      | 1 | 1 | 1 | 1     | 1 | 1 | 1 | 0      | 0               | 0.51472 | 0.50           | 0.58634 | 0.50        | 0.11616 | WT-scr only |      |
| sp Q09KX1 MLE2_MOUSE   | Myeloid leukemia factor 2 OS=Mus muscu       | 129.99            | 1                    | 1 | 1 | 1 | 1      | 1 | 1 | 1 | 1     | 1 | 1 | 1 | 0      | 0               | 0.51472 | 0.50           | 0.58634 | 0.50        | 0.11616 | WT-scr only |      |
| sp Q0P9B3 GALT2_MOUSE  | Polysialyltransferase 2 OS=Mus musculus      | 84.93             | 1                    | 1 | 1 | 1 | 1      | 1 | 1 | 1 | 1     | 1 | 1 | 1 | 0      | 0               | 0.45451 | 0.50           | 0.47527 | 0.50        | 0.11616 | WT-scr only |      |
| sp Q0TEK5 VKORL_MOUSE  | Vitamin K epoxide reductase complex subu     | 106.69            | 1                    | 1 | 1 | 1 | 1      | 1 | 1 | 1 | 1     | 1 | 1 | 2 | 1      | 1               | 0.47466 | 0.50           | 0.56392 | 0.50        | 0.13637 | 0.50        |      |
| sp P52795 EFN1_MOUSE   | Ephrin-B1 OS=Mus musculus (Mouse) GN=        | 38.54             | 1                    | 2 | 2 | 2 | 1      | 1 | 1 | 1 | 1     | 1 | 2 | 0 | 0      | 0               | 0.11616 | WT-scr only    | 0.11616 | 0.50        | 0.64301 | 0.50        |      |
| sp Q09112 LANC1_MOUSE  | Lancin-1 OS=Mus musculus (Mouse) GN=         | 244.51            | 1                    | 2 | 2 | 2 | 1      | 1 | 1 | 1 | 1     | 1 | 2 | 0 | 0      | 0               | 0.24050 | 0.50           | 0.24050 | 0.50        | 0.48711 | 0.50        |      |
| sp Q02204 P5CR2_MOUSE  | Pyruvate-5-carboxylate reductase 2 OS=M      | 135.56            | 3                    | 1 | 2 | 1 | 2      | 1 | 1 | 1 | 1     | 1 | 1 | 2 | 1      | 1               | 0.59098 | 0.50           | 0.33338 | 0.25        | 0.38383 | 0.25        |      |
| sp P61087 UBE2K_MOUSE  | Ubiquitin-conjugating enzyme E2 K OS=M       | 319.64            | 2                    | 2 | 1 | 1 | 1      | 1 | 1 | 1 | 1     | 1 | 1 | 2 | 0      | 1               | 0.15120 | WT-scr only    | 0.35349 | 0.33        | 0.36950 | 0.33        |      |
| tr D324C5 D324C5_MOUSE | Protein Ceif5 OS=Mus musculus (Mouse) C      | 123.27            | 1                    | 1 | 1 | 1 | 1      | 1 | 1 | 1 | 1     | 1 | 1 | 0 | 0      | 0               | 0.69646 | 0.50           | 0.37900 | WT-scr only | 0.37900 | WT-scr only |      |
| sp P52479 UBP10_MOUSE  | Ubiquitin carboxyl-terminal hydrolase 10 OS  | 189.71            | 1                    | 2 | 1 | 1 | 1      | 1 | 1 | 1 | 1     | 1 | 1 | 1 | 0      | 0               | 0.67090 | 0.50           | 0.37900 | WT-scr only | 0.77846 | 0.50        |      |
| sp Q03398 PDE1_MOUSE   | Phosphodiesterase 1 OS=Mus musculus (M       | 114.15            | 1                    | 1 | 1 | 1 | 1      | 1 | 1 | 1 | 1     | 1 | 1 | 1 | 0      | 0               | 0.37900 | WT-scr only    | 0.47420 | 0.50        | 0.56585 | 0.50        |      |
| sp Q05483 CSK2_MOUSE   | Cas kinase II subunit alpha' OS=Mus mu       | 254.63            | 1                    | 1 | 1 | 1 | 1      | 1 | 1 | 1 | 1     | 1 | 1 | 2 | 1      | 1               | 0.52850 | 0.50           | 0.60146 | 0.50        | 0.11658 | WT-scr only |      |
| sp P62482 KCB2_MOUSE   | Voltage-gated potassium channel subunit b    | 144.26            | 1                    | 1 | 1 | 1 | 1      | 1 | 1 | 1 | 1     | 1 | 1 | 1 | 0      | 0               | 0.52850 | 0.50           | 0.57867 | 0.50        | 0.11658 | WT-scr only |      |
| sp Q02201 IMRC2_MOUSE  | Mitochondrial isocitrate dehydrogenase compo | 229.77            | 1                    | 1 | 1 | 1 | 1      | 1 | 1 | 1 | 1     | 1 | 1 | 1 | 0      | 0               | 0.52850 | 0.50           | 0.11658 | WT-scr only | 0.51712 | 0.50        |      |
| sp Q09079 CPE_MOUSE    | Cationic protein 1 OS=Mus musculus (Mou      | 253.82            | 1                    | 1 | 1 | 1 | 1      | 1 | 1 | 1 | 1     | 1 | 1 | 1 | 0      | 0               | 0.52850 | 0.50           | 0.11658 | WT-scr only | 0.51712 | 0.50        |      |
| sp Q04A48 UBP7_MOUSE   | Ubiquitin carboxyl-terminal hydrolase 7 OS=  | 493.04            | 1                    | 1 | 1 | 1 | 1      | 1 | 1 | 1 | 1     | 1 | 1 | 2 | 1      | 0               | 0.48750 | 0.50           | 0.11658 | WT-scr only | 0.51712 | 0.50        |      |
| sp Q04133 AOF4_MOUSE   | Amine oxidase (flavin-containing) A OS=M     | 328.41            | 1                    | 1 | 1 | 1 | 1      | 1 | 1 | 1 | 1     | 1 | 1 | 2 | 1      | 0               | 0.48750 | 0.50           | 0.11658 | WT-scr only | 0.51712 | 0.50        |      |
| tr MD0WJ9 MO0WJ9_MOUSE | Protein Tmem78b OS=Mus musculus (Mo          | 64.67             | 1                    | 1 | 1 | 1 | 1      | 1 | 1 | 1 | 1     | 1 | 1 | 1 | 0      | 0               | 0.11658 | WT-scr only    | 0.57867 | 0.50        | 0.11658 | WT-scr only |      |
| sp Q0L0K0 SED1_MOUSE   | SEC14 domain and spectrin repeat-contain     | 328.02            | 1                    | 1 | 1 | 1 | 1      | 1 | 1 | 1 | 1     | 1 | 1 | 1 | 0      | 0               | 0.11658 | WT-scr only    | 0.51712 | 0.50        | 0.11658 | WT-scr only |      |
| sp Q0C8Z5 SMC1A_MOUSE  | Structural maintenance of chromosomes pr     | 144.72            | 1                    | 2 | 2 | 2 | 1      | 1 | 1 | 1 | 1     | 1 | 1 | 1 | 0      | 0               | 0.37900 | WT-scr only    | 0.71013 | 0.50        | 0.72094 | 0.50        |      |
| accession              | description                                  | protein_set_score | 1                    | 2 | 3 | 1 | 2      | 3 | 1 | 2 | 3     | 1 | 2 | 3 | WT     | K1-scr          | K1-93   | K1-93 / WT-scr | ratio   | ratio       | ratio   | ratio       |      |
| sp P20108 PRDX3_MOUSE  | Thioredoxin-dependent peroxide reductase     | 392.18            | 5                    | 4 | 4 | 2 | 3      | 2 | 2 | 5 | 1     | 3 | 3 | 3 | 3      | 2               | 3       | 0.00297        | 0.50    | 0.16642     | 0.50    | 0.2748      | 0.64 |
| sp P70207 PLX2_MOUSE   | Plexin-A2 OS=Mus musculus (Mouse) GN=        | 964.64            | 3                    | 4 | 5 | 2 | 2      | 1 | 3 | 1 | 3     | 3 | 3 | 3 | 2      | 3               | 0.02841 | 0.42           | 0.05967 | 0.33        | 0.24723 | 0.67        |      |
| sp Q08N00 ARMC2_MOUSE  | Armadillo repeat-containing protein 6 OS=    | 612.99            | 2                    | 1 | 3 | 2 | 1      | 1 | 1 | 2 | 1     | 1 | 1 | 3 | 2      | 3               | 0.28655 | 0.50           | 0.12914 | 0.33        | 0.853   |             |      |

| accession              | description                                    | protein_set_score | 1  | 2  | 3  | 1 | 2  | 3  | 1 | 2 | 3  | 1  | 2  | 3 | WT      | WT_0-93 | WT_0-82     | pvalue  | ratio   | pvalue  | ratio | pvalue | ratio |
|------------------------|------------------------------------------------|-------------------|----|----|----|---|----|----|---|---|----|----|----|---|---------|---------|-------------|---------|---------|---------|-------|--------|-------|
| sp P28352 APEX1_MOUSE  | DNA-(apurinic or apyrimidinic site) lyase OS   | 244.71            | 1  | 2  | 1  | 1 | 1  | 1  | 2 | 1 | 1  | 3  | 1  | 2 | 2       | 0.08215 | 0.25        | 0.79785 | 0.75    | 0.81207 | 1.00  |        |       |
| sp Q9WUJ4 ICHIP_MOUSE  | STP1 homology and U box-containing prot        | 262.29            | 1  | 2  | 1  | 1 | 1  | 1  | 3 | 1 | 1  | 1  | 2  | 2 | 0.34651 | 0.33    | 0.67150     | 1.33    | 0.36970 | 1.67    |       |        |       |
| sp Q55019 IMPCT_MOUSE  | Protein IMPACT OS=Mus musculus (Mus)           | 206.1             | 1  | 2  | 2  | 1 | 1  | 1  | 1 | 1 | 1  | 1  | 1  | 2 | 2       | 0.15344 | WT-seq only | 0.91773 | 1.00    | 0.74503 | 0.67  |        |       |
| sp Q3CWC9 PUR9_MOUSE   | Bifunctional protein biosynthesis protein PU   | 491.4             | 1  | 2  | 1  | 1 | 1  | 1  | 2 | 3 | 2  | 1  | 1  | 2 | 0       | 0.15344 | WT-seq only | 0.92710 | 1.00    | 0.90979 | 1.00  |        |       |
| sp Q7MTF3 INDUAC_MOUSE | NADH dehydrogenase [ubiquinone] 1 alpha        | 504.77            | 1  | 1  | 3  | 1 | 1  | 1  | 5 | 1 | 3  | 3  | 2  | 3 | 0.14448 | 0.20    | 0.33905     | 1.80    | 0.16220 | 1.60    |       |        |       |
| sp Q99L18 HGS_MOUSE    | Hepatocyte growth factor-regulated tyrosine    | 317.61            | 1  | 1  | 1  | 1 | 1  | 1  | 1 | 2 | 1  | 1  | 3  | 3 | 0.08314 | 0.33    | 0.91815     | 1.00    | 0.59770 | 1.33    |       |        |       |
| sp Q62174 HNRLL_MOUSE  | Heterogeneous nuclear ribonucleoprotein L      | 368.35            | 1  | 1  | 1  | 1 | 1  | 1  | 2 | 1 | 1  | 1  | 1  | 3 | 0       | 0.00000 | WT-seq only | 0.98875 | 1.00    | 0.65731 | 0.67  |        |       |
| sp Q3UKU3 CRUK3_MOUSE  | Protein uncharacterized protein OS=Mus m       | 114.08            | 1  | 1  | 1  | 1 | 1  | 1  | 1 | 1 | 1  | 1  | 1  | 3 | 0       | 0.00000 | WT-seq only | 0.98875 | 1.00    | 0.65731 | 0.67  |        |       |
| sp Q5DU25 IQEC2_MOUSE  | IQ motif and SEC domain-containing prote       | 116.53            | 1  | 1  | 1  | 1 | 1  | 1  | 1 | 1 | 1  | 1  | 1  | 3 | 0       | 0.00000 | WT-seq only | 0.53068 | 0.67    | 0.65731 | 0.67  |        |       |
| sp Q9KJ81 MYG1_MOUSE   | UPF0160 protein MYG1, mitochondrial OS         | 157.59            | 1  | 1  | 1  | 1 | 1  | 1  | 3 | 2 | 2  | 1  | 2  | 1 | 1       | 0.53515 | 0.50        | 0.78782 | 1.50    | 0.94411 | 1.00  |        |       |
| sp P12025 MK_MOUSE     | Middle kinase OS=Mus musculus (Mouse) GN=M     | 113.84            | 1  | 1  | 1  | 1 | 1  | 1  | 1 | 1 | 1  | 1  | 1  | 2 | 1       | 0.53515 | 0.50        | 0.96234 | 1.00    | 0.89255 | 1.00  |        |       |
| sp FR2AX1 FRZAX1_MOUSE | Protein uncharacterized protein OS=Mus m       | 174.67            | 1  | 1  | 1  | 1 | 1  | 1  | 2 | 2 | 1  | 1  | 1  | 2 | 1       | 0.50    | 0.50        | 0.97144 | 1.00    | 0.97144 | 1.00  |        |       |
| sp Q6GF77 EXOC3_MOUSE  | Exocyst subunit component 8 OS=Mus m           | 193.78            | 1  | 1  | 1  | 1 | 1  | 1  | 2 | 1 | 1  | 1  | 1  | 2 | 0       | 0.11633 | WT-seq only | 0.60271 | 1.50    | 0.87133 | 1.00  |        |       |
| sp P28063 PSB8_MOUSE   | Proteasome subunit beta type-8 OS=Mus m        | 50.08             | 1  | 1  | 1  | 1 | 1  | 1  | 1 | 1 | 1  | 1  | 1  | 2 | 0       | 0.11633 | WT-seq only | 0.96234 | 1.00    | 0.98255 | 1.00  |        |       |
| sp Q30TLH PRC2C_MOUSE  | Protein PRC2C OS=Mus musculus (Mus)            | 203.68            | 1  | 1  | 1  | 1 | 1  | 1  | 1 | 1 | 1  | 1  | 1  | 2 | 1       | 0.51472 | 0.50        | 0.97826 | 1.00    | 0.90617 | 1.00  |        |       |
| sp Q96W12 PEF5_MOUSE   | Peroxisomal targeting signal 1 receptor OS     | 168.27            | 1  | 1  | 1  | 1 | 1  | 1  | 1 | 1 | 1  | 1  | 1  | 2 | 0       | 0.45451 | 0.50        | 0.97826 | 1.00    | 0.90617 | 1.00  |        |       |
| sp Q9C4K1 C24T1_MOUSE  | Putative transferrin receptor 7 homolog, muc   | 73.12             | 1  | 1  | 1  | 1 | 1  | 1  | 1 | 1 | 1  | 1  | 1  | 2 | 0       | 0.11616 | WT-seq only | 0.97826 | 1.00    | 0.97826 | 1.00  |        |       |
| sp Q9D1L0 CHCH2_MOUSE  | Coiled-coil-helix-coiled-coil-helix domain-con | 43.11             | 1  | 1  | 1  | 1 | 1  | 1  | 1 | 1 | 1  | 1  | 1  | 1 | 0       | 0.37390 | WT-seq only | 0.96559 | 1.00    | 0.99229 | 1.00  |        |       |
| sp Q98WQ2 VAC14_MOUSE  | Protein VAC14 homolog OS=Mus musculus          | 191.47            | 1  | 1  | 1  | 1 | 1  | 1  | 1 | 1 | 1  | 1  | 1  | 1 | 0       | 0.37390 | WT-seq only | 0.96559 | 1.00    | 0.99229 | 1.00  |        |       |
| sp Q9R146 AFPH_MOUSE   | Acylamino-acid-releasing enzyme OS=Mus         | 105.09            | 1  | 1  | 1  | 1 | 1  | 1  | 1 | 1 | 1  | 1  | 1  | 1 | 0       | 0.37390 | WT-seq only | 0.96559 | 1.00    | 0.99229 | 1.00  |        |       |
| sp P62322 LSME_MOUSE   | Ub1 snRNP-associated Sm-like protein LSME      | 113.86            | 1  | 1  | 1  | 1 | 1  | 1  | 1 | 1 | 1  | 1  | 1  | 1 | 0       | 0.37390 | WT-seq only | 0.96559 | 1.00    | 0.99229 | 1.00  |        |       |
| sp Q9R0G7 SPNS1_MOUSE  | Protein spindler homolog 1 OS=Mus muscu        | 48.19             | 1  | 1  | 1  | 1 | 1  | 1  | 1 | 1 | 1  | 1  | 1  | 1 | 0       | 0.37390 | WT-seq only | 0.96559 | 1.00    | 0.99229 | 1.00  |        |       |
| sp Q35691 PINN_MOUSE   | Pinin OS=Mus musculus (Mouse) GN=Pnn           | 127.09            | 1  | 1  | 1  | 1 | 1  | 1  | 1 | 1 | 1  | 1  | 1  | 1 | 0       | 0.37390 | WT-seq only | 0.96559 | 1.00    | 0.99229 | 1.00  |        |       |
| sp Q8J20J LINTA_MOUSE  | Protein lin-7 homolog A OS=Mus musculus        | 254.8             | 1  | 2  | 2  | 1 | 1  | 1  | 3 | 1 | 1  | 2  | 2  | 2 | 3       | 0.40451 | 0.50        | 0.70222 | 1.25    | 0.90700 | 1.00  |        |       |
| sp P99029 OC9E_MOUSE   | Cytochrome b-c1 complex subunit 6, mitoch      | 193.84            | 2  | 2  | 1  | 1 | 1  | 1  | 1 | 1 | 1  | 1  | 1  | 1 | 3       | 0.37568 | 0.33        | 0.80000 | 1.00    | 0.79859 | 1.00  |        |       |
| sp Q4JLME ABL2_MOUSE   | Ablotin uncharacterized protein OS=Mus m       | 140.08            | 1  | 1  | 1  | 1 | 1  | 1  | 2 | 1 | 1  | 1  | 1  | 1 | 3       | 0.37568 | 0.33        | 0.80000 | 1.00    | 0.79859 | 1.00  |        |       |
| sp Q9CT10 RANB3_MOUSE  | Ran-binding protein 3 OS=Mus musculus (M       | 241.55            | 1  | 1  | 1  | 1 | 1  | 1  | 2 | 1 | 1  | 1  | 1  | 2 | 2       | 0.47580 | 0.50        | 0.80004 | 1.00    | 0.79859 | 1.00  |        |       |
| sp Q9BCH1 INGEF_MOUSE  | Ephexin-1 OS=Mus musculus (Mouse) GN=          | 451.11            | 1  | 1  | 1  | 1 | 1  | 1  | 2 | 1 | 1  | 1  | 1  | 2 | 0       | 0.11658 | WT-seq only | 0.56888 | 1.50    | 0.51885 | 1.50  |        |       |
| sp Q35857 TIM44_MOUSE  | Mitochondrial import inner membrane transp     | 254.37            | 5  | 1  | 1  | 1 | 1  | 1  | 1 | 1 | 1  | 1  | 1  | 1 | 1       | 0.37390 | WT-seq only | 0.99012 | 1.00    | 0.98315 | 1.00  |        |       |
| sp Q9B0C3 S3F1_MOUSE   | Solanum family 35 member F1 OS=Mus m           | 67.68             | 1  | 1  | 1  | 1 | 1  | 1  | 1 | 1 | 1  | 1  | 1  | 1 | 0       | 0.37390 | WT-seq only | 0.94927 | 1.00    | 0.98065 | 1.00  |        |       |
| sp Q90963 PAFA_MOUSE   | Platelet-activating factor acetyltransferase O | 40.98             | 1  | 1  | 1  | 1 | 1  | 1  | 1 | 1 | 1  | 1  | 1  | 1 | 0       | 0.37390 | WT-seq only | 0.96663 | 1.00    | 0.98065 | 1.00  |        |       |
| accession              | description                                    | protein_set_score | 1  | 2  | 3  | 1 | 2  | 3  | 1 | 2 | 3  | 1  | 2  | 3 | WT      | WT_0-93 | WT_0-82     | pvalue  | ratio   | pvalue  | ratio | pvalue | ratio |
| tr D3Y262 D3Y262_MOUSE | Unconventional myosin-Va OS=Mus muscu          | 3353.369          | 12 | 27 | 23 | 7 | 23 | 24 | 9 | 8 | 6  | 13 | 12 | 3 | 3       | 0.59991 | 0.87        | 0.05629 | 0.27    | 0.18386 | 0.50  |        |       |
| sp P31786 ACKP_MOUSE   | Acy-CoA-binding protein OS=Mus muscu           | 556.82            | 7  | 16 | 3  | 6 | 9  | 3  | 7 | 4 | 10 | 2  | 3  | 2 | 3       | 0.51424 | 0.69        | 0.30399 | 0.42    | 0.40120 | 0.46  |        |       |
| sp Q9Q2E5 COP1_MOUSE   | Cytoskeleton-associated protein 1 OS=Mus m     | 621.21            | 6  | 5  | 4  | 2 | 2  | 2  | 2 | 2 | 2  | 2  | 2  | 3 | 0       | 0.97071 | 0.53        | 0.90761 | 0.60    | 0.64281 | 0.53  |        |       |
| sp Q12A2 SRP3_MOUSE    | SLIT-ROBO Rho GTPase-activating protein        | 699.06            | 6  | 2  | 6  | 2 | 2  | 2  | 2 | 2 | 2  | 2  | 2  | 2 | 0       | 0.80408 | 1.25        | 0.21054 | 0.50    | 0.57822 | 0.50  |        |       |
| sp P99027 RLA2_MOUSE   | 60S acidic ribosomal protein P2 OS=Mus m       | 438.56            | 7  | 3  | 9  | 3 | 4  | 4  | 4 | 4 | 4  | 4  | 4  | 2 | 1       | 0.86116 | 1.20        | 0.44090 | 0.40    | 0.46042 | 0.40  |        |       |
| sp Q50542 SYVA_MOUSE   | Alpha-synuclein OS=Mus musculus (Mouse)        | 507.69            | 5  | 13 | 1  | 4 | 4  | 2  | 2 | 5 | 1  | 1  | 3  | 3 | 3       | 0.43052 | 0.53        | 0.41642 | 0.42    | 0.32893 | 0.32  |        |       |
| sp Q60625 ICAM5_MOUSE  | Intercellular adhesion molecule 5 OS=Mus       | 557.71            | 3  | 8  | 9  | 6 | 10 | 3  | 2 | 6 | 2  | 3  | 4  | 3 | 3       | 0.81016 | 0.95        | 0.28572 | 0.50    | 0.16397 | 0.35  |        |       |
| sp Q3UG14 Q3UG14_MOUSE | Diphosphoamino transferase protein OS=Mu       | 465.94            | 4  | 6  | 5  | 4 | 4  | 4  | 3 | 4 | 3  | 3  | 2  | 1 | 3       | 0.92862 | 0.81        | 0.24527 | 0.42    | 0.63934 | 0.42  |        |       |
| sp Q9DCS9 INDUBA_MOUSE | NADH dehydrogenase [ubiquinone] 1 beta         | 639.61            | 2  | 6  | 3  | 6 | 6  | 3  | 4 | 1 | 1  | 3  | 2  | 3 | 0       | 0.48176 | 1.36        | 0.27486 | 0.45    | 0.29663 | 0.45  |        |       |
| sp Q60780 GAS7_MOUSE   | Growth arrest-specific protein 7 OS=Mus m      | 659.39            | 4  | 3  | 6  | 7 | 6  | 4  | 4 | 1 | 2  | 1  | 2  | 3 | 2       | 0.47499 | 1.31        | 0.13865 | 0.38    | 0.03407 | 0.15  |        |       |
| sp Q50544 IBR_MOUSE    | Active brightfield cluster region-related prot | 612.47            | 4  | 3  | 4  | 6 | 6  | 4  | 3 | 1 | 1  | 2  | 3  | 3 | 2       | 0.14812 | 1.45        | 0.04806 | 0.45    | 0.19407 | 0.45  |        |       |
| sp Q9WUJ7 RAR3_MOUSE   | Retinoid X receptor gamma 3 OS=Mus m           | 571.78            | 3  | 4  | 2  | 4 | 2  | 3  | 4 | 2 | 2  | 2  | 2  | 2 | 0       | 0.65030 | 0.71        | 0.32930 | 0.40    | 0.16397 | 0.40  |        |       |
| sp Q90631 GRB2_MOUSE   | Growth factor receptor-binding protein 2 OS    | 523.77            | 3  | 4  | 4  | 2 | 3  | 2  | 3 | 3 | 2  | 3  | 2  | 3 | 0       | 0.35053 | 0.82        | 0.12726 | 0.45    | 0.01537 | 0.18  |        |       |
| sp Q9VD75 HIP1_MOUSE   | Huntingtin-interacting protein 1 OS=Mus m      | 726.08            | 4  | 4  | 2  | 4 | 2  | 3  | 1 | 2 | 1  | 2  | 2  | 3 | 3       | 0.66931 | 0.90        | 0.06810 | 0.40    | 0.12633 | 0.40  |        |       |
| sp Q35382 EXOC4_MOUSE  | Exocyst component 4 OS=Mus m                   | 474.06            | 2  | 2  | 2  | 3 | 3  | 2  | 1 | 1 | 1  | 2  | 3  | 3 | 3       | 0.18724 | 1.33        | 0.00019 | 0.50    | 0.11391 | 0.33  |        |       |
| sp Q7TDD2 TPP9_MOUSE   | Tubulin polymerization-promoting protein O     | 510.47            | 4  | 5  | 3  | 5 | 4  | 2  | 1 | 1 | 4  | 1  | 3  | 3 | 3       | 0.68860 | 0.92        | 0.03040 | 0.48    | 0.15251 | 0.50  |        |       |
| sp P94104 SRF3_MOUSE   | SRF family transcription factor 3 OS=Mu        | 212.22            | 2  | 2  | 1  | 5 | 4  | 2  | 2 | 2 | 1  | 2  | 2  | 3 | 2       | 0.90113 | 0.53        | 0.12457 | 0.40    | 0.08314 | 0.40  |        |       |
| sp Q9BYM5 NLGN3_MOUSE  | Neurigin-3 OS=Mus musculus (Mouse) GI          | 467.43            | 2  | 5  | 3  | 3 | 3  | 3  | 1 | 2 | 2  | 1  | 2  | 3 | 2       | 0.32121 | 0.75        | 0.07071 | 0.25    | 0.04933 | 0.17  |        |       |
| tr D3YV77 D3YV77_MOUSE | Protein Novx-2 OS=Mus musculus (Mouse)         | 320.7             | 5  | 2  | 2  | 2 | 3  | 4  | 4 | 1 | 1  | 1  | 3  | 3 | 2       | 0.89038 | 1.00        | 0.10468 | 0.22    | 0.30734 | 0.33  |        |       |
| sp Q91Y12 SNM4_MOUSE   | Sorting nexin-4 OS=Mus musculus (Mouse)        | 584.07            | 3  | 3  | 2  | 2 | 2  | 2  | 2 | 1 | 1  | 1  | 1  | 2 | 1       | 0.22854 | 0.86        | 0.03400 | 0.14    | 0.01028 | 0.14  |        |       |
| sp Q9J4M6 NUT3_MOUSE   | Nucleolin OS=Mus musculus (Mouse) GN=N         | 560.91            | 2  | 3  | 4  | 3 | 4  | 1  | 1 | 1 | 3  | 1  | 2  | 2 | 0       | 0.39187 | 0.67        | 0.01943 | 0.40    | 0.01028 | 0.14  |        |       |
| sp Q88737 BSN_MOUSE    | Protein bassoon OS=Mus musculus (Mus)          | 842.14            | 2  | 3  | 2  | 2 | 3  | 1  | 1 | 1 | 1  | 1  | 1  | 3 | 2       | 0.44177 | 1.71        | 0.02805 | 0.29    | 0.08265 | 0.29  |        |       |
| sp Q9DD03 RAB13_MOUSE  | Ras-related protein Rab-13 OS=Mus muscu        | 143.52            |    |    |    |   |    |    |   |   |    |    |    |   |         |         |             |         |         |         |       |        |       |





|                        |                                                                                |          |    |     |    |    |    |    |     |    |    |     |    |    |   |   |   |   |         |      |         |      |         |      |
|------------------------|--------------------------------------------------------------------------------|----------|----|-----|----|----|----|----|-----|----|----|-----|----|----|---|---|---|---|---------|------|---------|------|---------|------|
| sp P18760 COF1_MOUSE   | Cofilin-1 OS=Mus musculus (Mouse) GN=C                                         | 2235.44  | 72 | 72  | 62 | 61 | 75 | 81 | 67  | 58 | 70 | 58  | 49 | 54 | 3 | 3 | 3 | 3 | 0.97041 | 1.05 | 0.98663 | 0.95 | 0.06549 | 0.78 |
| sp P41042 TKT_MOUSE    | Transketolase OS=Mus musculus (Mouse)                                          | 3070.63  | 72 | 63  | 76 | 74 | 69 | 81 | 66  | 63 | 71 | 51  | 55 | 51 | 3 | 3 | 3 | 3 | 0.90697 | 1.06 | 0.98804 | 0.95 | 0.26371 | 0.79 |
| sp P44227 STMY1_MOUSE  | Stathmin OS=Mus musculus (Mouse) GN=C                                          | 1974.47  | 72 | 70  | 38 | 38 | 36 | 54 | 67  | 47 | 52 | 74  | 33 | 34 | 3 | 3 | 3 | 3 | 0.73986 | 1.12 | 0.73409 | 1.04 | 0.56364 | 0.79 |
| sp P18872 GNAO_MOUSE   | Guanine nucleotide-binding protein (G) subunit alpha-1 OS=Mus musculus (Mouse) | 3103.13  | 72 | 85  | 85 | 75 | 82 | 79 | 64  | 69 | 65 | 61  | 72 | 3  | 3 | 3 | 3 | 3 | 0.28745 | 0.98 | 0.19479 | 0.82 | 0.25209 | 0.81 |
| sp O08599 STXB1_MOUSE  | Syntaxin-13 OS=Mus musculus (Mouse)                                            | 4381.2   | 71 | 86  | 89 | 81 | 91 | 83 | 68  | 63 | 68 | 81  | 73 | 59 | 3 | 3 | 3 | 3 | 0.87432 | 1.04 | 0.14623 | 0.81 | 0.83733 | 0.87 |
| sp P43277 H13_MOUSE    | Histone H1.3 OS=Mus musculus (Mouse)                                           | 2272.18  | 71 | 65  | 60 | 62 | 62 | 49 | 105 | 79 | 44 | 127 | 69 | 50 | 3 | 3 | 3 | 3 | 0.93989 | 1.06 | 0.43674 | 1.16 | 0.27538 | 1.26 |
| sp Q1C513 DRC15_MOUSE  | Putative uncharacterized protein OS=Mus musculus (Mouse)                       | 4071     | 70 | 72  | 72 | 72 | 84 | 76 | 88  | 77 | 64 | 52  | 62 | 65 | 3 | 3 | 3 | 3 | 0.31767 | 1.08 | 0.17232 | 1.07 | 0.48848 | 0.84 |
| sp P43252 B2_MOUSE     | Beta-actin-2 OS=Mus musculus (Mouse)                                           | 4127.70  | 70 | 72  | 72 | 72 | 84 | 76 | 88  | 77 | 64 | 52  | 62 | 65 | 3 | 3 | 3 | 3 | 0.31767 | 1.08 | 0.17232 | 1.07 | 0.48848 | 0.84 |
| sp P09411 PGK1_MOUSE   | Phosphoglycerate kinase 1 OS=Mus musculus (Mouse)                              | 3293.47  | 69 | 60  | 59 | 59 | 70 | 73 | 70  | 77 | 63 | 52  | 56 | 55 | 3 | 3 | 3 | 3 | 0.36630 | 1.18 | 0.20107 | 1.12 | 0.19153 | 0.87 |
| sp P43274 H14_MOUSE    | Histone H1.4 OS=Mus musculus (Mouse)                                           | 2191.09  | 68 | 64  | 60 | 67 | 57 | 53 | 92  | 70 | 47 | 113 | 65 | 51 | 3 | 3 | 3 | 3 | 0.95904 | 1.03 | 0.47381 | 1.09 | 0.25354 | 1.19 |
| sp A2A070 TBB1_MOUSE   | Tubulin beta-1 chain OS=Mus musculus (Mouse)                                   | 604.49   | 67 | 51  | 57 | 50 | 55 | 60 | 60  | 53 | 55 | 54  | 53 | 60 | 3 | 3 | 3 | 3 | 0.35111 | 0.94 | 0.19299 | 0.96 | 0.53949 | 0.95 |
| sp P28064 H4_MOUSE     | Histone H4 OS=Mus musculus (Mouse)                                             | 1524.11  | 67 | 66  | 64 | 64 | 64 | 64 | 64  | 64 | 64 | 64  | 64 | 64 | 3 | 3 | 3 | 3 | 0.15212 | 0.91 | 0.14129 | 0.91 | 0.29132 | 0.89 |
| sp Q64478 H2B1H_MOUSE  | Histone H2B type 1-H OS=Mus musculus (Mouse)                                   | 1630.09  | 67 | 104 | 86 | 97 | 90 | 83 | 85  | 96 | 62 | 97  | 96 | 65 | 3 | 3 | 3 | 3 | 0.95443 | 1.05 | 0.94626 | 0.95 | 0.48084 | 1.00 |
| sp Q02053 UBA1_MOUSE   | Ubiquitin-like modifier-activating enzyme 1 OS=Mus musculus (Mouse)            | 4244.72  | 66 | 71  | 68 | 61 | 74 | 76 | 70  | 59 | 72 | 62  | 63 | 69 | 3 | 3 | 3 | 3 | 0.66915 | 1.03 | 0.60200 | 0.98 | 0.43456 | 0.95 |
| sp P10853 H2B1F_MOUSE  | Histone H2B type 1-F/UL OS=Mus musculus (Mouse)                                | 1615.7   | 66 | 105 | 86 | 95 | 90 | 84 | 54  | 67 | 60 | 96  | 95 | 64 | 3 | 3 | 3 | 3 | 0.97734 | 1.05 | 0.99515 | 1.04 | 0.52929 | 0.99 |
| sp Q88723 ACTL7_MOUSE  | Beta-actin-like protein 7 OS=Mus musculus (Mouse)                              | 2196.23  | 64 | 81  | 77 | 71 | 76 | 54 | 61  | 60 | 75 | 47  | 60 | 78 | 3 | 3 | 3 | 3 | 0.22123 | 0.93 | 0.52819 | 0.85 | 0.58343 | 0.83 |
| sp P15864 H12_MOUSE    | Histone H1.12 OS=Mus musculus (Mouse)                                          | 1150.47  | 64 | 21  | 28 | 32 | 32 | 32 | 82  | 56 | 62 | 109 | 42 | 3  | 3 | 3 | 3 | 3 | 0.98133 | 1.00 | 0.74275 | 1.02 | 0.40055 | 1.17 |
| sp Q64525 H2B2B_MOUSE  | Histone H2B type 2-B OS=Mus musculus (Mouse)                                   | 1627.68  | 62 | 95  | 85 | 90 | 84 | 80 | 74  | 93 | 61 | 87  | 90 | 64 | 3 | 3 | 3 | 3 | 0.96563 | 1.05 | 0.98357 | 0.94 | 0.48536 | 1.00 |
| sp Q64475 H2B1B_MOUSE  | Histone H2B type 1-B OS=Mus musculus (Mouse)                                   | 1583     | 60 | 95  | 85 | 86 | 84 | 81 | 75  | 90 | 60 | 85  | 87 | 63 | 3 | 3 | 3 | 3 | 0.99182 | 1.05 | 0.99118 | 0.94 | 0.54793 | 0.98 |
| sp P10854 H2B1M_MOUSE  | Histone H2B type 1-M OS=Mus musculus (Mouse)                                   | 1590.94  | 60 | 92  | 85 | 87 | 81 | 80 | 74  | 90 | 51 | 96  | 87 | 64 | 3 | 3 | 3 | 3 | 0.98612 | 1.05 | 0.96705 | 0.95 | 0.46400 | 1.00 |
| sp Q8C027 H2B1F_MOUSE  | Histone H2B type 1-F OS=Mus musculus (Mouse)                                   | 1540.56  | 55 | 90  | 85 | 81 | 81 | 81 | 68  | 88 | 60 | 78  | 85 | 63 | 3 | 3 | 3 | 3 | 0.94467 | 1.06 | 0.99311 | 0.94 | 0.54106 | 0.99 |
| sp Q8C0V8 H133B_MOUSE  | 14-3-3 protein beta/alpha OS=Mus musculus (Mouse)                              | 2707.711 | 58 | 79  | 68 | 68 | 70 | 63 | 68  | 58 | 55 | 57  | 54 | 48 | 3 | 3 | 3 | 3 | 0.50935 | 0.98 | 0.43526 | 0.88 | 0.25254 | 0.78 |
| sp P19821 H143G_MOUSE  | 14-3-3 protein gamma OS=Mus musculus (Mouse)                                   | 2560.041 | 63 | 72  | 73 | 70 | 78 | 78 | 74  | 58 | 53 | 71  | 52 | 48 | 3 | 3 | 3 | 3 | 0.52367 | 0.99 | 0.38709 | 0.89 | 0.35441 | 0.82 |
| sp P050516 VATA_MOUSE  | V-type proton ATPase catalytic subunit A OS=Mus musculus (Mouse)               | 3286.76  | 61 | 67  | 61 | 68 | 77 | 68 | 62  | 45 | 53 | 58  | 51 | 52 | 3 | 3 | 3 | 3 | 0.70942 | 1.07 | 0.02565 | 0.85 | 0.29970 | 0.85 |
| sp P050396 GDA_MOUSE   | Rap GDP dissociation inhibitor alpha OS=Mus musculus (Mouse)                   | 3418.31  | 55 | 66  | 59 | 55 | 68 | 59 | 53  | 52 | 54 | 56  | 51 | 49 | 3 | 3 | 3 | 3 | 0.51981 | 1.01 | 0.32222 | 0.88 | 0.76960 | 0.87 |
| sp P052814 VATB_MOUSE  | V-type proton ATPase subunit B OS=Mus musculus (Mouse)                         | 1937.99  | 57 | 64  | 60 | 61 | 61 | 57 | 60  | 61 | 61 | 61  | 61 | 61 | 3 | 3 | 3 | 3 | 0.98531 | 1.05 | 0.65631 | 0.95 | 0.25261 | 0.85 |
| sp P44862 ADT1_MOUSE   | ADP/ATP translocase 1 OS=Mus musculus (Mouse)                                  | 2496.59  | 54 | 61  | 60 | 61 | 57 | 74 | 51  | 60 | 66 | 48  | 48 | 3  | 3 | 3 | 3 | 3 | 0.48456 | 1.00 | 0.29023 | 1.04 | 0.66007 | 0.92 |
| sp P62874 GBB1_MOUSE   | Guanine nucleotide-binding protein (G) subunit beta-1 OS=Mus musculus (Mouse)  | 2951.47  | 60 | 61  | 61 | 66 | 76 | 63 | 70  | 63 | 59 | 67  | 50 | 54 | 3 | 3 | 3 | 3 | 0.23162 | 1.13 | 0.04766 | 1.05 | 0.13135 | 0.94 |
| sp P20122 VIME_MOUSE   | Vimentin OS=Mus musculus (Mouse) GN=C                                          | 2787.57  | 51 | 37  | 55 | 68 | 45 | 93 | 83  | 40 | 78 | 73  | 44 | 83 | 3 | 3 | 3 | 3 | 0.29822 | 1.44 | 0.18952 | 1.41 | 0.12818 | 1.40 |
| sp P05053 DLC_MOUSE    | Disulfide isomerase OS=Mus musculus (Mouse)                                    | 2175.609 | 54 | 54  | 54 | 54 | 54 | 54 | 54  | 54 | 54 | 54  | 54 | 54 | 3 | 3 | 3 | 3 | 0.16273 | 1.18 | 0.20734 | 1.22 | 0.19134 | 1.22 |
| sp Q5H28 OSH2B_MOUSE   | isocitrate dehydrogenase (NADP) OS=Mus musculus (Mouse)                        | 3016.47  | 59 | 54  | 55 | 53 | 62 | 67 | 56  | 45 | 64 | 47  | 39 | 54 | 3 | 3 | 3 | 3 | 0.66033 | 1.08 | 0.76730 | 0.98 | 0.63063 | 0.83 |
| sp Q88844 DHC_MOUSE    | isocitrate dehydrogenase (NADP) cytoplasmic isoform OS=Mus musculus (Mouse)    | 3016.47  | 59 | 54  | 55 | 53 | 62 | 67 | 56  | 45 | 64 | 47  | 39 | 54 | 3 | 3 | 3 | 3 | 0.66033 | 1.08 | 0.76730 | 0.98 | 0.63063 | 0.83 |
| sp P19096 FAS_MOUSE    | Fatty acid synthase OS=Mus musculus (Mouse)                                    | 6085.921 | 60 | 43  | 40 | 39 | 65 | 65 | 58  | 47 | 51 | 42  | 31 | 46 | 3 | 3 | 3 | 3 | 0.58459 | 1.18 | 0.33628 | 1.09 | 0.74159 | 0.83 |
| sp Q8R097 UOJ1_MOUSE   | Ubiquitin carboxyl-terminal hydrolase isozyme 1 OS=Mus musculus (Mouse)        | 1960.23  | 62 | 51  | 54 | 58 | 60 | 64 | 62  | 50 | 50 | 41  | 52 | 3  | 3 | 3 | 3 | 3 | 0.64411 | 1.09 | 0.13179 | 0.97 | 0.63270 | 0.94 |
| sp P27773 PDIA3_MOUSE  | Protein disulfide-isomerase A3 OS=Mus musculus (Mouse)                         | 2512.19  | 52 | 21  | 21 | 21 | 21 | 21 | 72  | 72 | 72 | 72  | 72 | 72 | 3 | 3 | 3 | 3 | 0.10489 | 1.02 | 0.07489 | 1.02 | 0.07489 | 1.02 |
| sp P62259 H1433E_MOUSE | 14-3-3 protein epsilon OS=Mus musculus (Mouse)                                 | 2298.8   | 40 | 52  | 49 | 41 | 55 | 57 | 59  | 36 | 43 | 54  | 34 | 44 | 3 | 3 | 3 | 3 | 0.77943 | 0.99 | 0.86400 | 0.98 | 0.73503 | 0.93 |
| sp D5MR34 D5MR34_MOUSE | Tubulin beta 3 OS=Mus musculus (Mouse)                                         | 938.37   | 62 | 43  | 52 | 42 | 59 | 57 | 52  | 50 | 53 | 49  | 46 | 51 | 3 | 3 | 3 | 3 | 0.76518 | 1.01 | 0.75906 | 0.99 | 0.70808 | 0.93 |
| sp Q13U18 Q13U18_MOUSE | Putative uncharacterized protein OS=Mus musculus (Mouse)                       | 2422.72  | 53 | 52  | 52 | 55 | 66 | 56 | 60  | 54 | 50 | 59  | 45 | 46 | 3 | 3 | 3 | 3 | 0.18273 | 1.13 | 0.07877 | 1.04 | 0.08247 | 0.96 |
| sp P20029 GRF7_MOUSE   | Ras guanine nucleotide-releasing factor 7 OS=Mus musculus (Mouse)              | 1932.38  | 59 | 60  | 50 | 50 | 50 | 50 | 63  | 65 | 65 | 65  | 65 | 65 | 3 | 3 | 3 | 3 | 0.99335 | 1.05 | 0.96335 | 1.05 | 0.26821 | 0.82 |
| sp Q1U292 Q1U292_MOUSE | Putative uncharacterized protein OS=Mus musculus (Mouse)                       | 1850.77  | 62 | 57  | 51 | 81 | 56 | 42 | 87  | 64 | 39 | 103 | 57 | 42 | 3 | 3 | 3 | 3 | 0.94965 | 1.05 | 0.91928 | 1.12 | 0.23237 | 1.19 |
| sp P22752 H2A1_MOUSE   | Histone H2A type 1 OS=Mus musculus (Mouse)                                     | 708.89   | 49 | 49  | 45 | 61 | 49 | 47 | 70  | 48 | 40 | 64  | 42 | 37 | 3 | 3 | 3 | 3 | 0.68280 | 1.10 | 0.32805 | 1.10 | 0.39959 | 1.00 |
| sp Q09K0 ACON_MOUSE    | Aconitate hydratase, mitochondrial OS=Mus musculus (Mouse)                     | 3506.08  | 37 | 51  | 49 | 48 | 54 | 54 | 55  | 41 | 57 | 49  | 42 | 47 | 3 | 3 | 3 | 3 | 0.40827 | 1.14 | 0.28214 | 1.12 | 0.23616 | 1.01 |
| sp P17156 HP72_MOUSE   | Heat shock-related 70 kDa protein 2 OS=Mus musculus (Mouse)                    | 1659.99  | 55 | 52  | 55 | 49 | 57 | 49 | 45  | 52 | 52 | 42  | 50 | 52 | 3 | 3 | 3 | 3 | 0.17150 | 0.97 | 0.53358 | 0.93 | 0.22226 | 0.90 |
| sp P28652 KCC2B_MOUSE  | Calcium/calmodulin-dependent protein kinase 2B OS=Mus musculus (Mouse)         | 2884.94  | 40 | 28  | 28 | 28 | 28 | 28 | 43  | 39 | 39 | 39  | 39 | 39 | 3 | 3 | 3 | 3 | 0.76244 | 1.01 | 0.39447 | 0.91 | 0.13721 | 0.81 |
| sp P33864 GRP75_MOUSE  | Heat shock 70 protein, mitochondrial OS=Mus musculus (Mouse)                   | 2994.14  | 42 | 45  | 46 | 42 | 44 | 45 | 45  | 40 | 43 | 40  | 46 | 37 | 3 | 3 | 3 | 3 | 0.20162 | 0.98 | 0.75123 | 0.96 | 0.67183 | 0.92 |
| sp Q8R1M2 H2A_MOUSE    | Histone H2A-J OS=Mus musculus (Mouse)                                          | 654.89   | 47 | 45  | 44 | 51 | 45 | 44 | 54  | 47 | 40 | 42  | 37 | 3  | 3 | 3 | 3 | 3 | 0.86651 | 1.03 | 0.25528 | 1.04 | 0.71890 | 0.90 |
| sp P14152 HDC_MOUSE    | Malate dehydrogenase, cytoplasmic OS=Mus musculus (Mouse)                      | 1884.12  | 42 | 48  | 51 | 46 | 60 | 50 | 52  | 45 | 44 | 48  | 40 | 37 | 3 | 3 | 3 | 3 | 0.57409 | 1.11 | 0.46693 | 1.00 | 0.99099 | 0.89 |
| sp Q8D061 HNRP1_MOUSE  | Heterogeneous nuclear ribonucleoprotein 1 OS=Mus musculus (Mouse)              | 2477.81  | 41 | 38  | 38 | 38 | 38 | 38 | 42  | 32 | 34 | 35  | 34 | 34 | 3 | 3 | 3 | 3 | 0.58871 | 1.02 | 0.58871 | 1.02 | 0.58871 | 1.02 |
| sp P44680 NSF_MOUSE    | Vesicle-fusion ATPase OS=Mus musculus (Mouse)                                  | 2997.06  | 46 | 54  | 54 | 45 | 61 | 49 | 50  | 49 | 53 | 38  | 39 | 36 | 3 | 3 | 3 |   |         |      |         |      |         |      |

|                        |                                                      |         |    |    |    |    |    |    |    |    |    |    |    |    |   |   |   |         |      |         |      |         |      |
|------------------------|------------------------------------------------------|---------|----|----|----|----|----|----|----|----|----|----|----|----|---|---|---|---------|------|---------|------|---------|------|
| sp Q0B020 ATP0_MOUSE   | ATP synthase subunit O, mitochondrial OS             | 1315.36 | 25 | 24 | 26 | 24 | 23 | 20 | 27 | 24 | 22 | 25 | 26 | 3  | 3 | 3 | 3 | 0.12715 | 0.89 | 0.94303 | 0.95 | 0.42531 | 0.97 |
| sp P06843 FAA1_MOUSE   | Eukaryotic initiation factor 4A1 OS=Mus mus          | 1655.42 | 25 | 24 | 21 | 26 | 25 | 27 | 27 | 18 | 24 | 25 | 26 | 3  | 3 | 3 | 3 | 0.36697 | 1.11 | 0.72809 | 0.99 | 0.19820 | 1.01 |
| sp P03157 CFD_MOUSE    | -complex protein 1 subunit delta OS=Mus              | 251.58  | 26 | 24 | 20 | 20 | 26 | 27 | 16 | 22 | 24 | 24 | 25 | 3  | 3 | 3 | 3 | 0.58154 | 0.98 | 0.92292 | 0.87 | 0.48243 | 0.94 |
| sp P27659 RL3_MOUSE    | 60S ribosomal protein L3 OS=Mus muscu                | 1285.56 | 25 | 23 | 23 | 21 | 24 | 25 | 16 | 28 | 23 | 18 | 23 | 3  | 3 | 3 | 3 | 0.26624 | 0.99 | 0.94254 | 0.94 | 0.75040 | 0.92 |
| sp P10630 F4A2_MOUSE   | Eukaryotic initiation factor 4A1i OS=Mus m           | 1592.2  | 24 | 22 | 18 | 21 | 21 | 21 | 21 | 17 | 20 | 16 | 23 | 3  | 3 | 3 | 3 | 0.51482 | 0.98 | 0.63868 | 0.91 | 0.74342 | 0.92 |
| sp Q0C213 QCR1_MOUSE   | Cytochrome b-c1 complex subunit 1, mito              | 1592.5  | 26 | 19 | 26 | 24 | 29 | 19 | 23 | 25 | 22 | 29 | 19 | 22 | 3 | 3 | 3 | 0.82109 | 1.01 | 0.71890 | 0.99 | 0.49512 | 0.99 |
| sp P03355 PCBP1_MOUSE  | Poly(C)binding protein 1 OS=Mus muscu                | 1227.62 | 16 | 16 | 14 | 15 | 16 | 12 | 20 | 17 | 14 | 14 | 22 | 3  | 3 | 3 | 3 | 0.22981 | 0.98 | 0.54707 | 1.07 | 0.36510 | 1.09 |
| sp P17426 AR2A1_MOUSE  | Arabinoside 2'-phosphate 4-epimerase OS              | 1474.76 | 25 | 21 | 25 | 25 | 22 | 22 | 22 | 22 | 22 | 22 | 22 | 3  | 3 | 3 | 3 | 0.28260 | 1.07 | 0.72177 | 1.00 | 0.28260 | 1.00 |
| sp P03017 TCP2_MOUSE   | T-complex protein 1 subunit zeta OS=Mus              | 1823.75 | 24 | 24 | 21 | 17 | 23 | 24 | 21 | 24 | 21 | 14 | 21 | 3  | 3 | 3 | 3 | 0.29266 | 0.94 | 0.37216 | 1.00 | 0.44261 | 0.81 |
| sp P03001 RAC1_MOUSE   | Ras-related C3 botulinum toxin substrate 1           | 887.79  | 25 | 21 | 21 | 24 | 23 | 22 | 20 | 22 | 23 | 18 | 22 | 3  | 3 | 3 | 3 | 0.85622 | 1.03 | 0.79911 | 0.97 | 0.88217 | 0.90 |
| sp P17710 HKK1_MOUSE   | Hekoxinase-1 OS=Mus musculus (Mouse)                 | 2637.04 | 24 | 20 | 25 | 20 | 22 | 24 | 26 | 19 | 18 | 26 | 20 | 3  | 3 | 3 | 3 | 0.59993 | 0.96 | 0.93222 | 0.80 | 0.36854 | 0.84 |
| sp Q01655 DMS1_MOUSE   | DMS1 OS=Mus musculus (Mouse) GN=                     | 1164.2  | 11 | 15 | 14 | 15 | 15 | 14 | 14 | 14 | 14 | 14 | 14 | 3  | 3 | 3 | 3 | 0.03366 | 1.41 | 0.03366 | 1.41 | 0.03366 | 1.41 |
| sp P02922 EPZF0_MOUSE  | Nucleoside diphosphate kinase OS=Mus r               | 860.91  | 19 | 20 | 19 | 20 | 21 | 25 | 20 | 23 | 23 | 24 | 20 | 3  | 3 | 3 | 3 | 0.89969 | 1.05 | 0.00372 | 1.17 | 0.34555 | 0.98 |
| sp P05201 AACT_MOUSE   | Aspartate aminotransferase, cytoplasmic O            | 1688.59 | 19 | 25 | 18 | 22 | 26 | 14 | 18 | 15 | 22 | 19 | 13 | 3  | 3 | 3 | 3 | 0.82338 | 1.00 | 0.53736 | 1.05 | 0.73105 | 0.84 |
| sp Q13UM7 Q3UM7_MOUSE  | Putative uncharacterized protein OS=Mus              | 1676.06 | 23 | 27 | 19 | 27 | 29 | 20 | 30 | 22 | 21 | 29 | 23 | 3  | 3 | 3 | 3 | 0.09508 | 1.23 | 0.35112 | 1.06 | 0.25465 | 1.03 |
| sp Q0A167 THIO_MOUSE   | Acetyl-CoA acetyltransferase, cytosolic OS           | 1558.24 | 25 | 21 | 25 | 21 | 28 | 27 | 21 | 22 | 28 | 18 | 17 | 3  | 3 | 3 | 3 | 0.88835 | 1.07 | 0.70551 | 1.00 | 0.21772 | 0.76 |
| sp Q05W99 OSW99_MOUSE  | Protein Rat-1a OS=Mus musculus (Mouse)               | 1596.53 | 25 | 22 | 27 | 20 | 26 | 19 | 19 | 19 | 18 | 19 | 18 | 3  | 3 | 3 | 3 | 0.29463 | 0.95 | 0.68925 | 0.95 | 0.33071 | 0.78 |
| sp P11983 TCPA_MOUSE   | T-complex protein 1 subunit alpha OS=Mu              | 2185.8  | 16 | 16 | 16 | 17 | 20 | 22 | 19 | 17 | 17 | 14 | 19 | 3  | 3 | 3 | 3 | 0.07038 | 1.23 | 0.00681 | 1.10 | 0.16928 | 1.04 |
| sp P08752 GNA2_MOUSE   | Guanine nucleotide-binding protein (G <i>β</i> ) sub | 1513.98 | 20 | 23 | 21 | 22 | 25 | 23 | 22 | 12 | 14 | 26 | 19 | 3  | 3 | 3 | 3 | 0.23677 | 1.09 | 0.10215 | 0.75 | 0.19384 | 0.98 |
| sp P03018 TCPE_MOUSE   | T-complex protein 1 subunit epsilon OS=Mu            | 1967.26 | 25 | 22 | 21 | 14 | 24 | 24 | 16 | 19 | 20 | 23 | 17 | 3  | 3 | 3 | 3 | 0.35297 | 0.91 | 0.28981 | 0.81 | 0.35363 | 0.85 |
| sp P00565 HZAZ_MOUSE   | Histone H2AZ OS=Mus musculus (Mouse)                 | 433.71  | 18 | 17 | 18 | 21 | 16 | 10 | 24 | 20 | 18 | 22 | 16 | 3  | 3 | 3 | 3 | 0.91783 | 1.06 | 0.02754 | 1.17 | 0.02681 | 1.06 |
| sp P08221 RAB1A_MOUSE  | Ras-related protein Rab-1A OS=Mus muscu              | 1573.59 | 27 | 25 | 26 | 20 | 20 | 26 | 18 | 19 | 23 | 15 | 18 | 3  | 3 | 3 | 3 | 0.42549 | 0.97 | 0.06814 | 0.81 | 0.30136 | 0.78 |
| sp P56399 UBP5_MOUSE   | Ubiquitin carboxyl-terminal hydrolase 5 OS           | 2002.94 | 15 | 18 | 20 | 19 | 24 | 25 | 16 | 14 | 13 | 14 | 15 | 3  | 3 | 3 | 3 | 0.13046 | 1.28 | 0.19480 | 0.81 | 0.93134 | 0.89 |
| sp Q01900 PCBP2_MOUSE  | Poly(C)binding protein 2 OS=Mus muscu                | 957.31  | 15 | 14 | 14 | 13 | 11 | 17 | 14 | 16 | 14 | 16 | 13 | 3  | 3 | 3 | 3 | 0.41649 | 0.93 | 0.55743 | 1.00 | 0.15873 | 1.07 |
| sp Q0B033 AP2B1_MOUSE  | AP-2 complex subunit beta OS=Mus muscu               | 2965.74 | 18 | 21 | 15 | 18 | 22 | 22 | 15 | 15 | 15 | 12 | 13 | 3  | 3 | 3 | 3 | 0.33373 | 1.15 | 0.18441 | 0.93 | 0.69123 | 0.94 |
| sp Q05802 GPR4_MOUSE   | Neutrophin receptor OS=Mus musculus (M               | 940.55  | 18 | 21 | 25 | 21 | 25 | 19 | 15 | 16 | 16 | 11 | 18 | 3  | 3 | 3 | 3 | 0.92696 | 1.05 | 0.01626 | 1.23 | 0.69013 | 0.95 |
| sp Q13JL0 Q3TL0_MOUSE  | Putative uncharacterized protein OS=Mus              | 1544.02 | 14 | 14 | 15 | 14 | 15 | 19 | 18 | 16 | 12 | 11 | 18 | 3  | 3 | 3 | 3 | 0.92696 | 1.05 | 0.01626 | 1.23 | 0.69013 | 0.95 |
| sp Q02288 PDIa6_MOUSE  | Protein disulfide-isomerase A6 OS=Mus m              | 1372.08 | 13 | 13 | 15 | 14 | 15 | 15 | 16 | 16 | 17 | 11 | 11 | 3  | 3 | 3 | 3 | 0.76327 | 0.97 | 0.01422 | 1.24 | 0.64924 | 0.98 |
| sp Q09C22 ATPH_MOUSE   | ATP synthase subunit e, mitochondrial OS             | 984.51  | 17 | 21 | 16 | 19 | 24 | 21 | 23 | 19 | 19 | 24 | 19 | 3  | 3 | 3 | 3 | 0.16647 | 1.19 | 0.04329 | 1.13 | 0.05103 | 1.11 |
| sp P07765 H2AX_MOUSE   | Histone H2AX OS=Mus musculus (Mouse)                 | 593.44  | 22 | 17 | 15 | 18 | 17 | 19 | 21 | 22 | 12 | 19 | 17 | 3  | 3 | 3 | 3 | 0.59905 | 0.91 | 0.21484 | 0.87 | 0.18512 | 1.02 |
| sp Q08809 DCI_MOUSE    | Neuronal migration protein doublecortin OS           | 1375.84 | 23 | 21 | 21 | 23 | 22 | 24 | 25 | 20 | 19 | 21 | 17 | 3  | 3 | 3 | 3 | 0.83381 | 1.06 | 0.57601 | 0.98 | 0.60520 | 0.86 |
| sp Q08H59 CMC1_MOUSE   | Calcium-binding mitochondrial carrier protei         | 2199.38 | 11 | 19 | 19 | 15 | 17 | 16 | 17 | 13 | 19 | 12 | 17 | 3  | 3 | 3 | 3 | 0.70548 | 0.98 | 0.91716 | 1.00 | 0.74365 | 0.94 |
| sp Q09P71 GDIR1_MOUSE  | Rho GDP-dissociation inhibitor 1 OS=Mus              | 1194.46 | 24 | 28 | 18 | 22 | 27 | 26 | 30 | 21 | 18 | 25 | 14 | 3  | 3 | 3 | 3 | 0.84142 | 1.07 | 0.83961 | 0.99 | 0.49663 | 0.80 |
| sp Q01758 NDKB_MOUSE   | Nucleoside diphosphate kinase B OS=Mus               | 771.67  | 18 | 17 | 15 | 18 | 17 | 19 | 21 | 16 | 19 | 20 | 17 | 3  | 3 | 3 | 3 | 0.55236 | 1.10 | 0.05952 | 1.12 | 0.62216 | 0.96 |
| sp P17879 HST1B_MOUSE  | Heat shock 70 kDa protein 1 OS=Mus mu                | 1383.47 | 15 | 19 | 19 | 18 | 15 | 15 | 14 | 14 | 17 | 16 | 16 | 3  | 3 | 3 | 3 | 0.82051 | 0.98 | 0.64845 | 0.89 | 0.67895 | 0.78 |
| sp Q01912 BACH_MOUSE   | Cytosolic acyl coenzyme A thioester hydro            | 1042.77 | 15 | 19 | 21 | 18 | 22 | 19 | 17 | 13 | 15 | 15 | 16 | 3  | 3 | 3 | 3 | 0.86284 | 1.07 | 0.25566 | 0.82 | 0.61255 | 0.95 |
| sp Q0C28 SCRNI_MOUSE   | Secam-1 OS=Mus musculus (Mouse) GN                   | 1132.8  | 19 | 16 | 17 | 16 | 22 | 21 | 15 | 17 | 14 | 15 | 16 | 3  | 3 | 3 | 3 | 0.46951 | 1.13 | 0.60219 | 0.88 | 0.85919 | 0.87 |
| sp Q03068 DHE3_BOVIN   | Glutamate dehydrogenase 1, mitochondrial             | 1634.37 | 20 | 16 | 26 | 18 | 23 | 21 | 15 | 22 | 25 | 13 | 16 | 3  | 3 | 3 | 3 | 0.60967 | 0.95 | 0.15222 | 0.94 | 0.85258 | 0.87 |
| sp Q01765 KNI_MOUSE    | Kinesin heavy chain OS=Mus musculus (M               | 1976.89 | 17 | 15 | 14 | 15 | 19 | 19 | 12 | 16 | 15 | 17 | 15 | 3  | 3 | 3 | 3 | 0.44720 | 1.02 | 0.14322 | 1.07 | 0.18601 | 1.00 |
| sp Q08FR5 EFTU_MOUSE   | Elongation factor Tu, mitochondrial OS=Mu            | 1075.32 | 17 | 17 | 15 | 15 | 13 | 13 | 15 | 13 | 15 | 13 | 16 | 3  | 3 | 3 | 3 | 0.08323 | 0.90 | 0.23179 | 0.88 | 0.81531 | 0.90 |
| sp Q020E5 FPP5_MOUSE   | Farnesyl pyrophosphate synthase OS=Mus               | 1316.66 | 19 | 15 | 15 | 13 | 21 | 22 | 12 | 14 | 18 | 12 | 13 | 3  | 3 | 3 | 3 | 0.65215 | 1.14 | 0.82092 | 0.90 | 0.79258 | 0.84 |
| sp P03011 RAB3A_MOUSE  | Ras-related protein Rab-3A OS=Mus muscu              | 1342.37 | 16 | 19 | 15 | 12 | 21 | 20 | 18 | 15 | 17 | 18 | 12 | 3  | 3 | 3 | 3 | 0.97609 | 1.06 | 0.40347 | 1.00 | 0.70794 | 0.92 |
| sp Q01785 Q3TKX_MOUSE  | Putative uncharacterized protein OS=Mus              | 1947.04 | 22 | 14 | 14 | 17 | 23 | 24 | 28 | 16 | 18 | 11 | 16 | 3  | 3 | 3 | 3 | 0.35547 | 1.25 | 0.39624 | 1.18 | 0.94558 | 0.88 |
| sp P03554 CAL_MOUSE    | Calnexin OS=Mus musculus (Mouse) GN=                 | 1947.04 | 22 | 14 | 14 | 17 | 23 | 24 | 28 | 16 | 18 | 11 | 16 | 3  | 3 | 3 | 3 | 0.35547 | 1.25 | 0.39624 | 1.18 | 0.94558 | 0.88 |
| sp Q01783 MATR3_MOUSE  | Matrin-3 OS=Mus musculus (Mouse) GN=M                | 1984.35 | 26 | 22 | 15 | 20 | 28 | 26 | 22 | 22 | 23 | 25 | 23 | 3  | 3 | 3 | 3 | 0.51979 | 1.17 | 0.40757 | 1.06 | 0.56920 | 1.00 |
| sp P47963 RL13_MOUSE   | 60S ribosomal protein L13 OS=Mus muscu               | 970.71  | 19 | 18 | 14 | 16 | 21 | 20 | 21 | 21 | 19 | 22 | 17 | 3  | 3 | 3 | 3 | 0.54915 | 1.12 | 0.06792 | 1.20 | 0.15555 | 1.06 |
| sp Q01699 HS105_MOUSE  | Heat shock protein 105 kDa OS=Mus musc               | 2701.64 | 15 | 15 | 15 | 15 | 16 | 23 | 15 | 16 | 16 | 16 | 15 | 3  | 3 | 3 | 3 | 0.33693 | 1.13 | 0.06717 | 1.20 | 0.07899 | 1.04 |
| sp Q02K23 SDA_MOUSE    | Sialin OS=Mus musculus (Mouse) GN=                   | 1774.90 | 21 | 14 | 14 | 16 | 16 | 16 | 17 | 17 | 16 | 16 | 16 | 3  | 3 | 3 | 3 | 0.21746 | 1.02 | 0.13464 | 0.87 | 0.18512 | 1.02 |
| sp Q0DBP5 PKCV_MOUSE   | UMP-CMP kinase OS=Mus musculus (Mou                  | 907.41  | 12 | 14 | 12 | 17 | 15 | 16 | 18 | 14 | 15 | 18 | 14 | 3  | 3 | 3 | 3 | 0.29120 | 1.16 | 0.04716 | 1.29 | 0.00039 | 1.24 |
| sp Q0C208 Q0C208_MOUSE | ATP synthase subunit gamma OS=Mus m                  | 1130.44 | 17 | 20 | 12 | 16 | 18 | 16 | 18 | 14 | 15 | 17 | 13 | 3  | 3 | 3 | 3 | 0.86872 | 1.02 | 0.92447 | 0.96 | 0.76888 | 0.92 |
| sp P415591 COF2_MOUSE  | Coflin-2 OS=Mus musculus (Mouse) GN=C                | 936.41  | 20 | 21 | 21 | 20 | 28 | 20 | 18 | 16 | 23 | 12 | 12 | 3  | 3 | 3 | 3 | 0.15391 | 0.94 | 0.84992 | 0.92 | 0.02932 | 0.83 |
| sp P07300 NFYB_MOUSE   | Neurofilin OS=                                       |         |    |    |    |    |    |    |    |    |    |    |    |    |   |   |   |         |      |         |      |         |      |

|                              |                                             |         |    |    |    |    |    |    |    |    |    |    |    |    |   |   |   |   |         |      |         |      |         |      |
|------------------------------|---------------------------------------------|---------|----|----|----|----|----|----|----|----|----|----|----|----|---|---|---|---|---------|------|---------|------|---------|------|
| sp B0V2N1 PTFRS_MOUSE        | Receptor-type tyrosine-protein phosphatase  | 1398.54 | 11 | 11 | 11 | 10 | 8  | 7  | 8  | 9  | 11 | 9  | 7  | 7  | 3 | 3 | 3 | 3 | 0.05277 | 0.76 | 0.47316 | 0.85 | 0.00121 | 0.70 |
| sp P93029 PROX5_MOUSE        | Peroxodioxin-5, mitochondrial OS=Mus mus    | 949.24  | 15 | 14 | 8  | 14 | 20 | 18 | 18 | 16 | 15 | 14 | 11 | 16 | 3 | 3 | 3 | 3 | 0.15602 | 1.41 | 0.08179 | 1.32 | 0.30103 | 1.11 |
| sp Q6CA19 C2CA1_MOUSE        | Putative uncharacterized protein OS=Mus mu  | 1469.94 | 18 | 9  | 15 | 16 | 20 | 15 | 12 | 16 | 14 | 12 | 14 | 3  | 3 | 3 | 3 | 3 | 0.04977 | 1.40 | 0.65193 | 1.08 | 0.52882 | 1.00 |
| sp Q1937 NPIM_MOUSE          | Nucleophosmin OS=Mus musculus (Mouse)       | 1346.99 | 16 | 17 | 15 | 12 | 13 | 19 | 12 | 16 | 18 | 12 | 12 | 3  | 3 | 3 | 3 | 3 | 0.95180 | 1.05 | 0.28353 | 1.24 | 0.36034 | 1.11 |
| sp P60879 SNP25_MOUSE        | Synaptosomal-associated protein 25 OS=M     | 1217.66 | 18 | 20 | 6  | 14 | 13 | 14 | 17 | 23 | 17 | 16 | 19 | 10 | 3 | 3 | 3 | 3 | 0.74807 | 0.93 | 0.32694 | 1.30 | 0.66116 | 1.02 |
| sp P55821 STM2_MOUSE         | Stathmin-2 OS=Mus musculus (Mouse) GN       | 733.25  | 17 | 17 | 10 | 17 | 14 | 14 | 19 | 12 | 14 | 22 | 10 | 11 | 3 | 3 | 3 | 3 | 0.93661 | 1.02 | 0.69604 | 1.02 | 0.77437 | 0.98 |
| sp A0A07WFLP A0A07WFLP_MOUSE | ATP-dependent RNA helicase A OS=Mus mu      | 1978.97 | 15 | 15 | 10 | 15 | 15 | 12 | 9  | 15 | 15 | 16 | 13 | 3  | 3 | 3 | 3 | 3 | 0.45489 | 1.13 | 0.98030 | 0.95 | 0.06373 | 1.32 |
| sp Q1301 CTNA2_MOUSE         | Cytoskeleton-associated protein 2 OS=Mus mu | 2523.03 | 15 | 15 | 10 | 12 | 17 | 17 | 14 | 14 | 14 | 14 | 14 | 3  | 3 | 3 | 3 | 3 | 0.45489 | 1.13 | 0.98030 | 0.95 | 0.06373 | 1.32 |
| sp P1205 ARF3_MOUSE          | ADP-ribosylation factor 3 OS=Mus muscu      | 1036.16 | 15 | 15 | 12 | 18 | 17 | 18 | 10 | 10 | 17 | 9  | 12 | 3  | 3 | 3 | 3 | 3 | 0.48302 | 1.18 | 0.22662 | 0.95 | 0.74281 | 0.95 |
| sp Q17M9 HNRPO_MOUSE         | Heterogeneous nuclear ribonucleoprotein C   | 1177.21 | 14 | 13 | 10 | 14 | 13 | 14 | 12 | 8  | 10 | 13 | 8  | 9  | 3 | 3 | 3 | 3 | 0.59172 | 1.11 | 0.23084 | 0.81 | 0.46455 | 0.81 |
| sp P17778 PBH_MOUSE          | Prohibitin OS=Mus musculus (Mouse) GNH      | 1317.46 | 11 | 12 | 7  | 13 | 11 | 14 | 11 | 6  | 6  | 13 | 9  | 9  | 3 | 3 | 3 | 3 | 0.27957 | 1.27 | 0.33555 | 0.77 | 0.35220 | 1.03 |
| sp Q03092 TALDO_MOUSE        | Tandemly repeated domain-containing pro     | 1108.4  | 11 | 10 | 8  | 12 | 10 | 11 | 11 | 6  | 10 | 15 | 15 | 3  | 3 | 3 | 3 | 3 | 0.49309 | 1.15 | 0.26530 | 0.91 | 0.48319 | 1.00 |
| sp E9DA05 E9DA05_MOUSE       | Glucosyl synthase kinase-3 beta OS=Mus      | 784.86  | 16 | 12 | 9  | 12 | 11 | 8  | 9  | 9  | 9  | 11 | 11 | 3  | 3 | 3 | 3 | 3 | 0.80381 | 1.00 | 0.22999 | 0.70 | 0.78392 | 0.84 |
| sp Q8E597 RTN3_MOUSE         | Reticulon-3 OS=Mus musculus (Mouse) GN      | 1332.27 | 14 | 13 | 10 | 17 | 19 | 15 | 10 | 10 | 12 | 7  | 7  | 3  | 3 | 3 | 3 | 3 | 0.78638 | 1.11 | 0.27844 | 0.89 | 0.16784 | 0.70 |
| sp Q8W74 VATG2_MOUSE         | V-type proton ATPase subunit G 2 OS=Mu      | 967.35  | 14 | 13 | 7  | 14 | 14 | 9  | 9  | 12 | 5  | 14 | 15 | 6  | 3 | 3 | 3 | 3 | 0.75306 | 1.12 | 0.59735 | 0.79 | 0.58789 | 1.06 |
| sp P64844 KRCB_MOUSE         | Protein kinase C delta type OS=Mus muscu    | 1432.23 | 14 | 13 | 9  | 11 | 13 | 9  | 9  | 14 | 9  | 9  | 11 | 6  | 3 | 3 | 3 | 3 | 0.91610 | 1.08 | 0.53780 | 0.78 | 0.56181 | 0.78 |
| sp Q10U11 FUBP2_MOUSE        | Far upstream element-binding protein 2 OS   | 116.16  | 15 | 16 | 10 | 10 | 11 | 14 | 14 | 14 | 14 | 14 | 14 | 3  | 3 | 3 | 3 | 3 | 0.53352 | 1.09 | 0.66536 | 0.97 | 0.70523 | 0.94 |
| sp P10922 H10_MOUSE          | Histone H1.0 OS=Mus musculus (Mouse) C      | 787.24  | 18 | 11 | 9  | 17 | 9  | 5  | 19 | 6  | 7  | 13 | 13 | 6  | 3 | 3 | 3 | 3 | 0.60083 | 0.82 | 0.70288 | 0.84 | 0.87546 | 0.84 |
| sp Q191WQ3 SYCY_MOUSE        | Thyrosine-tRNA ligase, cytoplasmic OS=Mu    | 1507.57 | 13 | 11 | 8  | 9  | 14 | 17 | 15 | 16 | 12 | 8  | 11 | 3  | 3 | 3 | 3 | 3 | 0.46321 | 1.25 | 0.09475 | 1.34 | 0.89269 | 0.91 |
| sp P62897 CYC_MOUSE          | Cytochrome c, somatic OS=Mus musculus i     | 932.62  | 14 | 17 | 8  | 9  | 15 | 13 | 14 | 12 | 7  | 15 | 8  | 3  | 3 | 3 | 3 | 3 | 0.67796 | 0.95 | 0.67574 | 0.85 | 0.64514 | 0.79 |
| sp P53279 RAB5A_MOUSE        | Ras-related protein Rab-5A OS=Mus muscu     | 788.99  | 11 | 11 | 10 | 14 | 11 | 12 | 9  | 10 | 12 | 7  | 11 | 3  | 3 | 3 | 3 | 3 | 0.65309 | 1.09 | 0.66536 | 0.97 | 0.70523 | 0.94 |
| sp P28660 NCKP1_MOUSE        | Nck-associated protein 1 OS=Mus muscu       | 1811.97 | 13 | 13 | 9  | 9  | 13 | 11 | 11 | 7  | 9  | 10 | 5  | 8  | 3 | 3 | 3 | 3 | 0.44823 | 0.94 | 0.18821 | 0.77 | 0.13832 | 0.66 |
| sp P63028 TCTP_MOUSE         | Translationally-controlled tumor protein OS | 491.41  | 11 | 14 | 9  | 7  | 11 | 9  | 12 | 11 | 11 | 8  | 7  | 11 | 3 | 3 | 3 | 3 | 0.13681 | 0.79 | 0.61363 | 1.00 | 0.52199 | 0.76 |
| sp P63094 GNAS2_MOUSE        | Guanine nucleotide-binding protein (G)s su  | 704.81  | 11 | 13 | 10 | 10 | 13 | 10 | 8  | 7  | 9  | 13 | 8  | 9  | 3 | 3 | 3 | 3 | 0.42773 | 0.97 | 0.04226 | 0.71 | 0.90185 | 0.88 |
| sp P14151 RS10_MOUSE         | 40S ribosomal protein S10 OS=Mus muscu      | 856.65  | 14 | 9  | 10 | 12 | 8  | 9  | 9  | 8  | 9  | 8  | 12 | 3  | 3 | 3 | 3 | 3 | 0.18977 | 0.79 | 0.18977 | 0.79 | 0.66512 | 0.79 |
| sp P54022 RANG_MOUSE         | Ras-related protein 514 OS=Mus muscu        | 483.94  | 11 | 11 | 11 | 11 | 11 | 11 | 9  | 9  | 9  | 9  | 9  | 3  | 3 | 3 | 3 | 3 | 0.81528 | 0.93 | 0.06610 | 1.03 | 0.19270 | 0.67 |
| sp P62264 RS14_MOUSE         | 40S ribosomal protein S14 OS=Mus muscu      | 657.07  | 14 | 12 | 6  | 9  | 10 | 10 | 14 | 8  | 12 | 8  | 12 | 8  | 3 | 3 | 3 | 3 | 0.58097 | 0.91 | 0.89713 | 0.94 | 0.87913 | 0.91 |
| sp Q17291 SUCB1_MOUSE        | Succinyl-CoA ligase [ADP-forming] subunit   | 1014.48 | 11 | 11 | 9  | 7  | 9  | 6  | 10 | 8  | 9  | 10 | 6  | 8  | 3 | 3 | 3 | 3 | 0.02117 | 0.71 | 0.22328 | 0.87 | 0.21925 | 0.77 |
| sp Q17522 MAP9_MOUSE         | Microtubule-associated protein 6 OS=Mus i   | 1522.28 | 23 | 15 | 5  | 20 | 15 | 7  | 22 | 14 | 3  | 19 | 15 | 3  | 3 | 3 | 3 | 3 | 0.91269 | 0.98 | 0.90562 | 0.91 | 0.83701 | 0.79 |
| sp Q0220M UBCL2_MOUSE        | Ubiquitin-like protein 2 OS=Mus muscu       | 753.37  | 15 | 14 | 10 | 11 | 10 | 11 | 19 | 10 | 19 | 17 | 6  | 4  | 3 | 3 | 3 | 3 | 0.54171 | 1.02 | 0.84011 | 0.85 | 0.48011 | 0.85 |
| sp Q3UNH4 GRIN_MOUSE         | G-protein-regulated inducer of neurite out  | 1683.04 | 20 | 14 | 3  | 23 | 15 | 5  | 14 | 9  | 1  | 15 | 7  | 1  | 3 | 3 | 3 | 3 | 0.83374 | 1.16 | 0.56004 | 0.65 | 0.56371 | 0.62 |
| sp Q0C244 NSFC1_MOUSE        | NSFL-1 cofactor p47 OS=Mus musculus (M      | 887.46  | 12 | 11 | 3  | 9  | 12 | 6  | 11 | 6  | 6  | 8  | 4  | 3  | 3 | 3 | 3 | 3 | 0.99245 | 1.04 | 0.58894 | 0.88 | 0.75314 | 0.77 |
| sp Q17073 OTU1_MOUSE         | Ubiquitin thioesterase OTU1 OS=Mus mu       | 854.79  | 12 | 12 | 4  | 9  | 9  | 10 | 12 | 4  | 6  | 11 | 4  | 6  | 3 | 3 | 3 | 3 | 0.90031 | 1.00 | 0.61709 | 0.79 | 0.63494 | 0.75 |
| sp Q61753 SERA_MOUSE         | D-3-phosphoglycerate dehydrogenase OS       | 1248.79 | 16 | 9  | 17 | 13 | 11 | 17 | 15 | 17 | 24 | 14 | 16 | 15 | 3 | 3 | 3 | 3 | 0.83598 | 1.00 | 0.23394 | 1.37 | 0.34387 | 1.10 |
| sp Q09L01 PARK7_MOUSE        | Putative uncharacterized protein OS=Mus     | 896.13  | 10 | 10 | 11 | 13 | 15 | 19 | 11 | 7  | 10 | 13 | 6  | 4  | 3 | 3 | 3 | 3 | 0.89171 | 1.02 | 0.39137 | 0.93 | 0.89137 | 0.93 |
| sp Q0CWS0 DDAH1_MOUSE        | NG1(N)-O-dimethylarginine dimethylamino     | 1381.74 | 15 | 10 | 11 | 15 | 15 | 20 | 14 | 13 | 17 | 11 | 10 | 15 | 3 | 3 | 3 | 3 | 0.16023 | 0.39 | 0.19870 | 1.22 | 0.56376 | 1.00 |
| sp Q1V55 O91V55_MOUSE        | 40S ribosomal protein S5 OS=Mus muscu       | 1318.97 | 12 | 10 | 11 | 12 | 14 | 16 | 14 | 11 | 8  | 12 | 10 | 12 | 3 | 3 | 3 | 3 | 0.11816 | 1.27 | 0.77219 | 1.00 | 0.14778 | 1.03 |
| sp P01831 THY1_MOUSE         | Thy1 membrane glycoprotein OS=Mus mu        | 440.31  | 12 | 10 | 11 | 11 | 14 | 13 | 15 | 14 | 10 | 13 | 8  | 9  | 3 | 3 | 3 | 3 | 0.30424 | 1.15 | 0.17507 | 1.18 | 0.91233 | 0.91 |
| sp Q08Q02 Q8Q02_MOUSE        | Putative uncharacterized protein OS=Mus     | 838.02  | 10 | 10 | 10 | 12 | 13 | 9  | 11 | 7  | 10 | 13 | 9  | 10 | 3 | 3 | 3 | 3 | 0.86373 | 1.06 | 0.95375 | 0.85 | 0.89543 | 0.85 |
| sp H7B336 H7B336_MOUSE       | Serine/threonine-protein kinase DCLK1 OS    | 863.8   | 12 | 10 | 11 | 12 | 12 | 11 | 6  | 12 | 13 | 9  | 10 | 3  | 3 | 3 | 3 | 3 | 0.87306 | 1.03 | 0.52619 | 0.83 | 0.85642 | 0.91 |
| sp P61255 RL26_MOUSE         | 60S ribosomal protein L26 OS=Mus muscu      | 914.88  | 11 | 9  | 11 | 13 | 17 | 12 | 9  | 7  | 11 | 11 | 9  | 10 | 3 | 3 | 3 | 3 | 0.11458 | 1.35 | 0.61105 | 0.87 | 0.35470 | 0.97 |
| sp Q64522 JL2A2B_MOUSE       | Histone H2A type 2-B OS=Mus musculus (f     | 371.21  | 15 | 10 | 12 | 12 | 9  | 8  | 12 | 13 | 5  | 11 | 13 | 9  | 3 | 3 | 3 | 3 | 0.22447 | 0.78 | 0.58978 | 0.81 | 0.92403 | 0.89 |
| sp Q0C228 RS19_MOUSE         | 40S ribosomal protein S19 OS=Mus muscu      | 837.16  | 15 | 13 | 10 | 9  | 13 | 15 | 17 | 10 | 13 | 10 | 13 | 8  | 3 | 3 | 3 | 3 | 0.86201 | 1.03 | 0.36749 | 1.11 | 0.15511 | 1.03 |
| sp P6158 DYL1_MOUSE          | Dynamin light chain 1, cytoplasmic OS=Mu    | 1042.05 | 9  | 11 | 10 | 11 | 10 | 10 | 14 | 9  | 10 | 12 | 13 | 3  | 3 | 3 | 3 | 3 | 0.77447 | 0.91 | 0.77447 | 0.91 | 0.77447 | 0.91 |
| sp P53994 RAB2A_MOUSE        | Ras-related protein Rab-2A OS=Mus muscu     | 1010.94 | 13 | 10 | 11 | 10 | 11 | 10 | 8  | 8  | 9  | 7  | 8  | 3  | 3 | 3 | 3 | 3 | 0.21728 | 0.91 | 0.10722 | 0.74 | 0.07464 | 0.65 |
| sp P48758 CBR1_MOUSE         | Carbonyl reductase [NADPH] 1 OS=Mus mu      | 921.49  | 11 | 9  | 12 | 9  | 9  | 9  | 14 | 6  | 9  | 12 | 10 | 10 | 3 | 3 | 3 | 3 | 0.13270 | 0.84 | 0.75018 | 0.91 | 0.29009 | 1.00 |
| sp Q19174 PSA1_MOUSE         | Proteasome subunit alpha type 1 OS=Mus      | 1016.21 | 13 | 9  | 7  | 11 | 12 | 12 | 16 | 12 | 8  | 16 | 14 | 9  | 3 | 3 | 3 | 3 | 0.45681 | 1.21 | 0.33589 | 1.24 | 0.13885 | 1.34 |
| sp P53550 TMA1_MOUSE         | Tubulin alpha-1B chain OS=Mus musculus      | 830.76  | 14 | 13 | 10 | 11 | 11 | 13 | 13 | 13 | 13 | 13 | 13 | 3  | 3 | 3 | 3 | 3 | 0.84111 | 1.08 | 0.84111 | 1.08 | 0.84111 | 1.08 |
| sp P11448 RL7_MOUSE          | 60S ribosomal protein L7 OS=Mus muscu       | 969.79  | 11 | 10 | 10 | 17 | 13 | 12 | 13 | 7  | 8  | 16 | 7  | 6  | 3 | 3 | 3 | 3 | 0.18312 | 1.35 | 0.65654 | 0.90 | 0.94176 | 0.94 |
| sp P10852 4F2_MOUSE          | 4F2 cell-surface antigen heavy chain OS=    | 1166.06 | 11 | 8  | 9  | 11 | 13 | 13 | 16 | 10 | 8  | 12 | 10 | 10 | 3 | 3 | 3 | 3 | 0.08202 | 1.32 | 0.31377 | 1.21 | 0.03588 | 1.14 |
| sp P62242 RS8_MOUSE          | 40S ribosomal protein S8 OS=Mus muscu       | 930.    |    |    |    |    |    |    |    |    |    |    |    |    |   |   |   |   |         |      |         |      |         |      |

|                      |                                                |         |    |    |    |    |    |    |    |    |    |    |    |    |    |   |   |   |         |      |         |      |         |      |
|----------------------|------------------------------------------------|---------|----|----|----|----|----|----|----|----|----|----|----|----|----|---|---|---|---------|------|---------|------|---------|------|
| tfE907C9E907C9_MOUSE | Kinesin light chain 1 OS=Mus musculus (M       | 1625.7  | 8  | 7  | 8  | 11 | 10 | 11 | 7  | 4  | 6  | 9  | 5  | 8  | 3  | 3 | 3 | 3 | 0.03009 | 1.39 | 0.10120 | 0.74 | 0.66842 | 0.96 |
| tfQ3U8V9Q3U8V_MOUSE  | Putative uncharacterized protein OS=Mus        | 977.81  | 9  | 9  | 10 | 11 | 9  | 9  | 10 | 7  | 8  | 7  | 6  | 8  | 3  | 3 | 3 | 3 | 0.94588 | 1.04 | 0.39827 | 0.89 | 0.49597 | 0.82 |
| tfQ3J29J3M29J_MOUSE  | Hydroxy-methylglutaryl-CoA synthase, cytopl    | 1677.67 | 9  | 10 | 8  | 12 | 13 | 6  | 12 | 9  | 9  | 10 | 9  | 3  | 3  | 3 | 3 | 3 | 0.25149 | 1.44 | 0.33597 | 1.24 | 0.18425 | 1.12 |
| tfQ3N15N15N_MOUSE    | Spirosome RNA helicase Ddx3b OS=M              | 920.49  | 9  | 7  | 7  | 8  | 12 | 13 | 12 | 8  | 7  | 11 | 8  | 6  | 3  | 3 | 3 | 3 | 0.12455 | 1.44 | 0.25607 | 1.17 | 0.04375 | 1.17 |
| tfQ3JKK7TMO2D_MOUSE  | Tropomodulin-2 OS=Mus musculus (M)             | 866.17  | 9  | 9  | 9  | 9  | 11 | 11 | 11 | 6  | 7  | 11 | 8  | 8  | 3  | 3 | 3 | 3 | 0.11764 | 1.15 | 0.55312 | 0.89 | 0.07950 | 1.00 |
| tfB8Q34B8Q34_MOUSE   | Liprin-alpha 2 OS=Mus musculus (Mouse)         | 1425.91 | 10 | 6  | 7  | 6  | 13 | 11 | 9  | 6  | 5  | 4  | 5  | 3  | 3  | 3 | 3 | 3 | 0.46315 | 1.30 | 0.64959 | 0.87 | 0.10697 | 0.52 |
| tfP46838R1B_MOUSE    | Ras-related protein Rab-11B OS=Mus muscu       | 872.32  | 6  | 8  | 7  | 7  | 12 | 16 | 7  | 3  | 6  | 5  | 3  | 5  | 3  | 3 | 3 | 3 | 0.13890 | 1.57 | 0.28277 | 0.76 | 0.44069 | 0.76 |
| tfP6R64Q6R1P_MOUSE   | SH3 domain protein 1 OS=Mus musculus (M        | 1000.63 | 9  | 7  | 7  | 7  | 12 | 16 | 6  | 5  | 6  | 5  | 3  | 3  | 3  | 3 | 3 | 3 | 0.19635 | 1.28 | 0.29822 | 0.88 | 0.16285 | 0.28 |
| tfQ3Y1WV3SHL3_MOUSE  | SH3 domain-binding glutamic acid-rich f        | 281.31  | 7  | 6  | 7  | 8  | 11 | 9  | 11 | 3  | 3  | 7  | 1  | 3  | 3  | 3 | 3 | 3 | 0.04128 | 1.40 | 0.82924 | 1.05 | 0.10705 | 0.65 |
| tfQ3C98R3UC9R_MOUSE  | Cytochrome b-c1 complex subunit Rheska, n      | 660.91  | 7  | 7  | 7  | 10 | 11 | 10 | 7  | 11 | 4  | 11 | 6  | 5  | 3  | 3 | 3 | 3 | 0.00036 | 1.08 | 0.74868 | 1.05 | 0.50608 | 1.05 |
| tfQ3Y17L3Q3Y17_MOUSE | Putative uncharacterized protein OS=Mus        | 908.14  | 10 | 9  | 6  | 8  | 11 | 7  | 10 | 9  | 12 | 10 | 5  | 8  | 3  | 3 | 3 | 3 | 0.96274 | 1.04 | 0.17582 | 1.24 | 0.89886 | 0.92 |
| tfE3K6Q4E3K6Q_MOUSE  | Hexokinase II OS=Mus musculus (M)              | 1965.38 | 9  | 7  | 7  | 7  | 12 | 16 | 6  | 5  | 6  | 5  | 4  | 3  | 3  | 3 | 3 | 3 | 0.79031 | 1.14 | 0.60302 | 0.82 | 0.60262 | 0.62 |
| tfP3934Q3ELOC_MOUSE  | Transcription elongation factor B polypept     | 611.13  | 7  | 8  | 7  | 6  | 11 | 9  | 9  | 7  | 7  | 10 | 4  | 9  | 3  | 3 | 3 | 3 | 0.49667 | 1.18 | 0.07943 | 1.05 | 0.54595 | 1.05 |
| tfP16074R3AC3_MOUSE  | Ras-related G3 botulinum toxin substrate 3     | 619.83  | 9  | 9  | 10 | 9  | 12 | 10 | 8  | 7  | 6  | 8  | 5  | 6  | 3  | 3 | 3 | 3 | 0.55849 | 1.11 | 0.03304 | 0.75 | 0.03303 | 0.68 |
| tfQ3X04P4P4B_MOUSE   | Phosphatidylinositol 5-ophosphate 4-kinase I   | 915.03  | 7  | 9  | 9  | 9  | 12 | 10 | 6  | 7  | 5  | 9  | 7  | 10 | 3  | 3 | 3 | 3 | 0.15907 | 1.24 | 0.13060 | 0.72 | 0.28911 | 1.04 |
| tfQ3C0W7ZSNAG_MOUSE  | Gamma-tubulin NSF attachment protein C         | 1004.96 | 6  | 8  | 8  | 8  | 12 | 9  | 8  | 8  | 5  | 9  | 5  | 6  | 3  | 3 | 3 | 3 | 0.42562 | 1.21 | 0.89036 | 0.88 | 0.67119 | 0.83 |
| tfQ3R01G2PLK4_MOUSE  | Plexin-A4 OS=Mus musculus (Mouse) GN=          | 1900.63 | 6  | 6  | 10 | 11 | 6  | 8  | 8  | 8  | 5  | 13 | 8  | 7  | 3  | 3 | 3 | 3 | 0.82224 | 1.18 | 0.09224 | 0.73 | 0.61946 | 1.09 |
| tfQ3BH2Q4FA9A_MOUSE  | Protein FAM9A OS=Mus musculus (Mouse)          | 928.63  | 10 | 10 | 9  | 8  | 12 | 6  | 5  | 6  | 6  | 8  | 5  | 4  | 3  | 3 | 3 | 3 | 0.40123 | 0.90 | 0.00676 | 0.59 | 0.02444 | 0.59 |
| tfQ3C0C2ZCY88_MOUSE  | Cytochrome b5 type B OS=Mus musculus (         | 521.9   | 10 | 7  | 9  | 11 | 9  | 3  | 7  | 7  | 5  | 5  | 7  | 3  | 3  | 3 | 3 | 3 | 0.54337 | 1.12 | 0.24389 | 0.65 | 0.15030 | 0.65 |
| tfQ3Z2Q6SEPT5_MOUSE  | Septin-5 OS=Mus musculus (Mouse) GN=F          | 981.84  | 10 | 8  | 9  | 7  | 13 | 6  | 5  | 4  | 7  | 5  | 7  | 5  | 3  | 3 | 3 | 3 | 0.90908 | 1.04 | 0.02523 | 0.99 | 0.12812 | 0.63 |
| tfQ3R795GLQ2_MOUSE   | Glycosylase 2 subunit beta OS=Mus muscu        | 632.29  | 8  | 7  | 7  | 7  | 11 | 11 | 9  | 11 | 7  | 4  | 6  | 3  | 3  | 3 | 3 | 3 | 0.45534 | 1.18 | 0.00727 | 1.41 | 0.27677 | 0.77 |
| tfQ3U561Q3U56_MOUSE  | Ribosomal protein OS=Mus musculus (M)          | 506.04  | 9  | 6  | 8  | 10 | 9  | 12 | 14 | 7  | 9  | 9  | 7  | 4  | 3  | 3 | 3 | 3 | 0.18174 | 1.35 | 0.22600 | 1.30 | 0.88787 | 0.87 |
| tfP32921SYWC_MOUSE   | Tytophan-tRNA ligase, cytoplasmic OS=H         | 1291.1  | 9  | 8  | 8  | 8  | 12 | 10 | 8  | 6  | 11 | 9  | 7  | 3  | 3  | 3 | 3 | 3 | 0.46071 | 1.16 | 0.95855 | 0.96 | 0.12671 | 1.08 |
| tfP37033HNRH2_MOUSE  | Heterogeneous nuclear ribonucleoprotein H      | 794.72  | 10 | 8  | 8  | 8  | 11 | 10 | 8  | 10 | 8  | 7  | 10 | 3  | 3  | 3 | 3 | 3 | 0.95496 | 1.04 | 0.28996 | 1.04 | 0.71145 | 0.93 |
| tfQ3D176RRL3_MOUSE   | 60S ribosomal protein L34 OS=Mus muscu         | 383.21  | 10 | 9  | 6  | 6  | 11 | 6  | 7  | 9  | 7  | 9  | 8  | 3  | 3  | 3 | 3 | 3 | 0.62847 | 0.92 | 0.78970 | 0.88 | 0.62599 | 0.96 |
| tfQ3R328PSPC1_MOUSE  | Alpha-spectrin cytoplasmic 1 OS=Mus muscu      | 737.35  | 9  | 7  | 7  | 7  | 12 | 9  | 9  | 16 | 9  | 4  | 7  | 3  | 3  | 3 | 3 | 3 | 0.9395  | 1.36 | 0.11582 | 1.23 | 0.25965 | 0.73 |
| tfQ3T05Q3T05_MOUSE   | Putative uncharacterized protein OS=Mus        | 611.52  | 9  | 6  | 6  | 8  | 7  | 11 | 8  | 6  | 9  | 4  | 4  | 7  | 3  | 3 | 3 | 3 | 0.46098 | 1.24 | 0.48217 | 1.10 | 0.48807 | 0.71 |
| tfP162823RAB3C_MOUSE | Ras-related protein Rab-3C OS=Mus muscu        | 959.97  | 10 | 9  | 8  | 8  | 10 | 8  | 12 | 12 | 12 | 8  | 5  | 7  | 3  | 3 | 3 | 3 | 0.35335 | 0.93 | 0.00423 | 1.33 | 0.15063 | 0.74 |
| tfQ3C91VATG1_MOUSE   | V-type proton ATPase subunit G1 OS=Mus         | 599.89  | 9  | 8  | 6  | 8  | 9  | 9  | 13 | 12 | 8  | 9  | 9  | 4  | 3  | 3 | 3 | 3 | 0.51239 | 1.13 | 0.07910 | 1.43 | 0.77857 | 0.96 |
| tfP3484HMF_MOUSE     | 5S4 subunit OS=Mus musculus (M)                | 554.31  | 10 | 9  | 7  | 7  | 10 | 16 | 9  | 11 | 15 | 8  | 7  | 3  | 3  | 3 | 3 | 3 | 0.19359 | 1.05 | 0.12905 | 1.05 | 0.29055 | 0.82 |
| tfQ3E167DDX3X_MOUSE  | ATP-dependent RNA helicase DDX3X OS=           | 1413.91 | 9  | 9  | 8  | 7  | 10 | 10 | 15 | 8  | 7  | 14 | 7  | 10 | 10 | 3 | 3 | 3 | 0.88121 | 1.04 | 0.30516 | 1.23 | 0.37675 | 1.04 |
| tfQ3Z204HNRFC_MOUSE  | Heterogeneous nuclear ribonucleoproteins       | 1016.32 | 9  | 7  | 7  | 8  | 7  | 8  | 15 | 8  | 8  | 13 | 8  | 8  | 3  | 3 | 3 | 3 | 0.72036 | 1.00 | 0.18637 | 1.35 | 0.67069 | 1.26 |
| tfQ3C9C1OCX6_MOUSE   | Cytochrome c oxidase subunit 6C OS=Mus         | 422.45  | 9  | 6  | 7  | 10 | 10 | 10 | 14 | 10 | 7  | 11 | 10 | 6  | 3  | 3 | 3 | 3 | 0.09360 | 1.36 | 0.14574 | 1.41 | 0.20479 | 1.23 |
| tfQ3E0C3VFS3_MOUSE   | Vacuolar protein sorting-associated protein    | 660.52  | 9  | 7  | 9  | 8  | 9  | 6  | 11 | 4  | 9  | 8  | 8  | 4  | 3  | 3 | 3 | 3 | 0.35081 | 0.92 | 0.97748 | 0.96 | 0.64956 | 0.80 |
| tfP170372ELAV1_MOUSE | ELAV-like protein L26 OS=Mus musculus (M       | 554.31  | 9  | 7  | 7  | 7  | 10 | 10 | 12 | 5  | 6  | 3  | 4  | 2  | 3  | 3 | 3 | 3 | 0.00194 | 1.02 | 0.49437 | 1.28 | 0.19487 | 0.72 |
| tfQ4L64Q4L64_MOUSE   | AMPA-selective glutamate receptor 2 flip ty    | 1267.62 | 6  | 6  | 6  | 6  | 6  | 6  | 12 | 2  | 3  | 11 | 2  | 3  | 3  | 3 | 3 | 3 | 0.46458 | 1.17 | 0.90406 | 0.94 | 0.66708 | 0.72 |
| tfQ3JKD3SCAMS_MOUSE  | Secretory carrier-associated membrane prot     | 181.08  | 8  | 8  | 8  | 7  | 8  | 7  | 9  | 11 | 9  | 7  | 8  | 8  | 3  | 3 | 3 | 3 | 0.01634 | 0.92 | 0.12507 | 1.21 | 0.45427 | 0.96 |
| tfP12382PFKAL_MOUSE  | ATP-dependent 6-phosphofruktokinase, liv       | 864.56  | 7  | 6  | 9  | 7  | 9  | 8  | 6  | 11 | 10 | 3  | 4  | 8  | 3  | 3 | 3 | 3 | 0.83582 | 1.09 | 0.38712 | 1.23 | 0.51125 | 0.68 |
| tfQ3E93C3Q3E93_MOUSE | NCOR2 OS=Mus musculus (Mouse) GN=              | 504.77  | 7  | 8  | 7  | 7  | 10 | 10 | 9  | 9  | 11 | 8  | 5  | 7  | 3  | 3 | 3 | 3 | 0.92074 | 1.04 | 0.07025 | 1.26 | 0.10765 | 0.87 |
| tfQ3Q0Z0EIF3_MOUSE   | Eukaryotic translation initiation factor 3, su | 579.98  | 8  | 8  | 6  | 7  | 10 | 10 | 9  | 9  | 7  | 9  | 8  | 8  | 3  | 3 | 3 | 3 | 0.49691 | 1.17 | 0.36252 | 1.00 | 0.35638 | 1.04 |
| tfQ3B8G78PHL2_MOUSE  | Phytanoyl-CoA hydroxylase-interacting prot     | 707.6   | 8  | 8  | 8  | 8  | 7  | 10 | 6  | 9  | 7  | 6  | 8  | 8  | 3  | 3 | 3 | 3 | 0.96958 | 1.04 | 0.19128 | 0.92 | 0.74401 | 0.92 |
| tfQ3A12Q3A12_MOUSE   | 14-3-3 protein sigma OS=Mus musculus (M        | 385.59  | 10 | 10 | 9  | 8  | 8  | 8  | 6  | 9  | 6  | 7  | 8  | 9  | 3  | 3 | 3 | 3 | 0.05327 | 0.86 | 0.19971 | 0.72 | 0.69181 | 0.83 |
| tfQ3U8Y7Q3U8Y_MOUSE  | Putative uncharacterized protein OS=Mus        | 1150.27 | 6  | 8  | 8  | 7  | 8  | 8  | 8  | 6  | 9  | 8  | 6  | 7  | 3  | 3 | 3 | 3 | 0.64801 | 1.10 | 0.42544 | 1.10 | 0.42256 | 1.00 |
| tfP41105R2L2_MOUSE   | 60S ribosomal protein L26 OS=Mus muscu         | 390.26  | 9  | 10 | 9  | 7  | 10 | 10 | 10 | 9  | 8  | 9  | 8  | 8  | 3  | 3 | 3 | 3 | 0.54005 | 0.97 | 0.00889 | 1.02 | 0.16487 | 0.72 |
| tfQ3E127ADBP_MOUSE   | TAR DNA-binding protein 43 OS=Mus muscu        | 920.33  | 10 | 8  | 6  | 9  | 8  | 10 | 10 | 9  | 8  | 9  | 6  | 8  | 3  | 3 | 3 | 3 | 0.31669 | 0.96 | 0.02970 | 1.13 | 0.39274 | 0.96 |
| tfQ3R9L4FRTCB_MOUSE  | tRNA-spike binding site beta-type OS=Mus       | 719.5   | 7  | 8  | 6  | 7  | 9  | 9  | 7  | 8  | 8  | 10 | 5  | 8  | 3  | 3 | 3 | 3 | 0.19913 | 1.19 | 0.25718 | 1.10 | 0.28601 | 1.10 |
| tfQ3Q061PSB1_MOUSE   | Proteasome subunit beta type-1 OS=Mus          | 848.16  | 7  | 10 | 8  | 7  | 7  | 9  | 10 | 6  | 8  | 7  | 5  | 7  | 3  | 3 | 3 | 3 | 0.36350 | 0.92 | 0.97229 | 0.96 | 0.22616 | 0.76 |
| tfP32032RST_MOUSE    | 40S ribosomal protein S7 OS=Mus muscu          | 504.06  | 7  | 9  | 7  | 6  | 9  | 9  | 9  | 10 | 8  | 6  | 5  | 7  | 3  | 3 | 3 | 3 | 0.97416 | 1.05 | 0.07165 | 1.26 | 0.37765 | 0.87 |
| tfQ3B8U3GEFH_MOUSE   | Gephyrin OS=Mus musculus (Mouse) GN=           | 735.52  | 9  | 10 | 6  | 9  | 8  | 8  | 8  | 7  | 8  | 8  | 5  | 5  | 3  | 3 | 3 | 3 | 0.80713 | 1.00 | 0.87028 | 0.92 | 0.25499 | 0.72 |
| tfQ3E2W3JRL10_MOUSE  | 60S ribosomal protein L10 OS=Mus muscu         | 580.75  | 9  | 7  | 7  | 10 | 9  | 9  | 7  | 9  | 6  | 4  | 10 | 6  | 3  | 3 | 3 | 3 | 0.24937 | 1.22 | 0.98286 | 0.96 | 0.95868 | 0.87 |
| tfP165E4U4SYG1_MOUSE | Ras/Rap GTPase-activating protein SynG1        | 1116.16 | 6  | 6  | 6  | 8  | 8  | 7  | 8  | 6  | 3  | 6  | 3  | 3  | 3  | 3 | 3 | 3 | 0.37529 | 1.15 | 0.23035 | 0.85 | 0.83141 | 0.85 |
| tfP17754CAZ2_MOUSE   | F-actin-capping protein subunit alpha-2 OS     | 895.65  | 6  | 10 | 10 | 8  | 10 | 10 | 8  | 6  | 5  | 9  | 5  | 5  | 3  | 3 | 3 | 3 | 0.88349 | 1.08 |         |      |         |      |

|                           |                                                 |        |         |    |    |    |    |    |    |    |    |    |    |    |   |   |   |   |         |         |         |         |         |         |      |
|---------------------------|-------------------------------------------------|--------|---------|----|----|----|----|----|----|----|----|----|----|----|---|---|---|---|---------|---------|---------|---------|---------|---------|------|
| sp Q810U4 NRCAM_MOUSE     | Neuronal cell adhesion molecule                 | OS=Mus | 756.47  | 8  | 5  | 5  | 9  | 6  | 8  | 7  | 9  | 10 | 3  | 6  | 8 | 3 | 3 | 3 | 3       | 0.40961 | 1.28    | 0.12693 | 1.44    | 0.79157 | 0.94 |
| sp Q9918D DDAH2_MOUSE     | NG(10C)-dimethylarginine dimethylaminohy        | OS=Mus | 822.33  | 7  | 3  | 4  | 8  | 8  | 9  | 5  | 6  | 9  | 6  | 4  | 9 | 3 | 3 | 3 | 3       | 0.06429 | 1.79    | 0.27530 | 1.43    | 0.30967 | 1.36 |
| sp Q9WV02 RBMX_MOUSE      | RNA-binding motif protein X chromosome 1        | OS=Mus | 584.85  | 10 | 5  | 6  | 10 | 6  | 9  | 9  | 8  | 15 | 4  | 3  | 3 | 3 | 3 | 3 | 0.51458 | 1.25    | 0.49655 | 1.16    | 0.49655 | 0.90    |      |
| sp Q1V493 QAV49_MOUSE     | Protein kinase C OS=Mus musculus                | OS=Mus | 1253.63 | 8  | 4  | 5  | 6  | 8  | 4  | 1  | 7  | 7  | 4  | 5  | 5 | 3 | 3 | 3 | 0.99184 | 1.06    | 0.95356 | 0.88    | 0.82874 | 0.82    |      |
| sp P61089 UBE2N_MOUSE     | Ubiquitin-conjugating enzyme E2 N OS=M          | OS=M   | 621.57  | 6  | 4  | 5  | 7  | 3  | 4  | 7  | 6  | 5  | 5  | 3  | 3 | 3 | 3 | 3 | 0.75563 | 0.93    | 0.16532 | 1.20    | 0.29433 | 0.73    |      |
| sp Q3JHU0 AAK1_MOUSE      | AP2-associated protein kinase 1 OS=Mus          | OS=M   | 1032.19 | 7  | 3  | 3  | 6  | 3  | 3  | 7  | 3  | 1  | 6  | 3  | 2 | 3 | 3 | 3 | 0.80219 | 0.92    | 0.77592 | 0.85    | 0.85590 | 0.85    |      |
| sp E9PVC5 EPFV2_MOUSE     | Eukaryotic translation initiation factor 4 gam  | OS=M   | 1335.39 | 7  | 5  | 3  | 8  | 5  | 5  | 3  | 8  | 9  | 4  | 2  | 3 | 3 | 3 | 3 | 0.64908 | 1.20    | 0.51140 | 1.13    | 0.85554 | 1.00    |      |
| sp Q8KCS5 IFP2_MOUSE      | Microtubule-associated protein 1A               | OS=M   | 1421.24 | 6  | 3  | 6  | 3  | 6  | 3  | 2  | 4  | 3  | 1  | 14 | 3 | 3 | 3 | 3 | 0.48124 | 1.36    | 0.29232 | 1.07    | 0.48124 | 0.73    |      |
| sp I4A0G2 DNT1 A0A0G2JDN7 | Microtubule-associated protein OS=Mus m         | OS=M   | 956.66  | 8  | 3  | 2  | 10 | 4  | 1  | 14 | 3  | 1  | 10 | 2  | 1 | 3 | 3 | 3 | 0.87299 | 1.15    | 0.72488 | 1.38    | 0.56288 | 1.00    |      |
| sp Q782A7 NP1L4_MOUSE     | Nucleosome assembly protein 1-like 4 OS=        | OS=M   | 839.15  | 10 | 4  | 4  | 4  | 5  | 12 | 8  | 13 | 8  | 9  | 7  | 8 | 6 | 3 | 3 | 0.52901 | 1.39    | 0.12202 | 1.67    | 0.43071 | 1.17    |      |
| sp Q90YF9 NDRG3_MOUSE     | Protein NDRG3 OS=Mus musculus                   | OS=M   | 838.63  | 7  | 3  | 2  | 5  | 7  | 6  | 6  | 6  | 2  | 4  | 7  | 3 | 3 | 3 | 3 | 0.34705 | 1.50    | 0.68990 | 1.17    | 0.56953 | 1.17    |      |
| sp Q9C1W1 PAK2_MOUSE      | Protein kinase PAK2 OS=Mus musculus             | OS=M   | 814.44  | 6  | 4  | 3  | 2  | 10 | 4  | 4  | 4  | 3  | 7  | 4  | 4 | 3 | 3 | 3 | 0.42514 | 1.46    | 0.52737 | 1.01    | 0.52737 | 1.15    |      |
| sp Q9C2D3 SYG_MOUSE       | Glycine-tRNA synthetase OS=Mus musculus (M      | OS=M   | 1210.6  | 10 | 3  | 3  | 5  | 9  | 6  | 5  | 6  | 6  | 6  | 6  | 4 | 3 | 3 | 3 | 0.72898 | 1.25    | 0.79295 | 1.06    | 0.79647 | 1.00    |      |
| sp P62334 PRS1_MOUSE      | 26S proteasome regulatory subunit 10B OS=       | OS=M   | 833.39  | 6  | 3  | 4  | 2  | 7  | 9  | 3  | 6  | 7  | 5  | 6  | 7 | 3 | 3 | 3 | 0.57927 | 1.38    | 0.16486 | 1.23    | 0.13410 | 1.38    |      |
| sp P59999 ARPC4_MOUSE     | Actin-related protein 2/3 complex subunit 4     | OS=M   | 553.91  | 7  | 4  | 4  | 5  | 6  | 8  | 4  | 6  | 5  | 3  | 5  | 7 | 3 | 3 | 3 | 0.47486 | 1.27    | 0.80741 | 1.00    | 0.68531 | 1.00    |      |
| sp P80033 PDIM4_MOUSE     | Protein disulfide-isomerase A4 OS=Mus m         | OS=M   | 1108.01 | 6  | 5  | 5  | 7  | 7  | 5  | 3  | 3  | 6  | 2  | 4  | 3 | 3 | 3 | 3 | 0.28116 | 1.36    | 0.44407 | 0.79    | 0.53661 | 0.86    |      |
| sp Q9E125 P1B3_MOUSE      | Platelet-activating factor acetyltransferase IB | OS=M   | 449.77  | 6  | 9  | 7  | 7  | 7  | 7  | 5  | 3  | 5  | 4  | 4  | 4 | 3 | 3 | 3 | 0.78943 | 0.85    | 0.40937 | 0.65    | 0.65970 | 0.71    |      |
| sp Q90972 RBBP4_MOUSE     | Histone-binding protein RBBP4 OS=Mus m          | OS=M   | 418.74  | 6  | 5  | 4  | 4  | 8  | 5  | 7  | 3  | 6  | 7  | 2  | 5 | 3 | 3 | 3 | 0.51012 | 1.31    | 0.44745 | 1.23    | 0.66519 | 1.08    |      |
| sp Q86814 SAH3_MOUSE      | Putative adenosylhomocysteinase 3 OS=N          | OS=N   | 593.99  | 6  | 5  | 4  | 4  | 7  | 4  | 6  | 4  | 1  | 5  | 4  | 1 | 3 | 3 | 3 | 0.80261 | 1.00    | 0.45649 | 0.73    | 0.40058 | 0.67    |      |
| sp Q8CA77 POM2L_MOUSE     | Glucose 1,6-bisphosphate synthase OS=M          | OS=M   | 1292.91 | 6  | 2  | 5  | 5  | 8  | 4  | 6  | 1  | 5  | 4  | 1  | 4 | 3 | 3 | 3 | 0.57170 | 1.31    | 0.89297 | 0.92    | 0.55408 | 0.69    |      |
| sp Q90145 SC2A_MOUSE      | Protein transposin protein Sec23A OS=Mus m      | OS=M   | 1044.28 | 5  | 5  | 5  | 8  | 5  | 3  | 2  | 5  | 5  | 6  | 2  | 7 | 3 | 3 | 3 | 0.71440 | 1.13    | 0.16286 | 0.63    | 0.89763 | 0.94    |      |
| sp Q9CR16 PP1D_MOUSE      | Protein phosphatase 1 delta OS=Mus muscu        | OS=M   | 757.83  | 6  | 5  | 4  | 5  | 7  | 5  | 5  | 5  | 3  | 7  | 4  | 5 | 3 | 3 | 3 | 0.63503 | 1.13    | 0.65698 | 0.87    | 0.30679 | 1.07    |      |
| sp Q62318 TIF1_MOUSE      | Transcription intermediary factor 1-beta OS=    | OS=M   | 905.66  | 6  | 2  | 3  | 5  | 6  | 6  | 6  | 4  | 2  | 4  | 2  | 4 | 3 | 3 | 3 | 0.93596 | 1.00    | 0.79313 | 1.09    | 0.97890 | 0.91    |      |
| sp Q8BMS1 ECH3_MOUSE      | Triphosphonucleoside synthase, mtchoc           | OS=M   | 1784.76 | 6  | 4  | 4  | 5  | 5  | 6  | 11 | 6  | 7  | 5  | 4  | 7 | 3 | 3 | 3 | 0.61492 | 1.14    | 0.04724 | 1.71    | 0.34676 | 1.14    |      |
| sp Q9D019 SYRC_MOUSE      | Arginine-tRNA ligase, cytoplasmic OS=Mus        | OS=M   | 988.11  | 6  | 4  | 3  | 4  | 5  | 7  | 9  | 7  | 6  | 7  | 6  | 7 | 3 | 3 | 3 | 0.97214 | 1.07    | 0.24156 | 1.27    | 0.18491 | 1.33    |      |
| sp Q9JUL0 GPD1L_MOUSE     | Glycerol-3-phosphate dehydrogenase, like        | OS=M   | 874.24  | 5  | 5  | 5  | 4  | 8  | 9  | 6  | 2  | 6  | 2  | 5  | 3 | 3 | 3 | 3 | 0.70383 | 0.80    | 0.66609 | 0.89    | 0.65439 | 0.88    |      |
| sp Q91WU8 FUBP1_MOUSE     | Far upstream element-binding protein 1 OS       | OS=M   | 855.56  | 6  | 5  | 2  | 2  | 4  | 7  | 2  | 2  | 5  | 3  | 5  | 3 | 3 | 3 | 3 | 0.90836 | 1.00    | 0.54244 | 0.69    | 0.55387 | 0.62    |      |
| sp Q9VM18 IRG_MOUSE       | Immunity-related GTPase family C protein 1      | OS=M   | 55.57   | 6  | 3  | 3  | 4  | 3  | 3  | 5  | 6  | 2  | 4  | 3  | 2 | 3 | 3 | 3 | 0.50636 | 0.83    | 0.75185 | 1.08    | 0.59327 | 0.75    |      |
| sp Q9T7M8 HUME1_MOUSE     | E3 ubiquitin-protein ligase HUME1 OS=M          | OS=M   | 921.66  | 6  | 3  | 2  | 4  | 5  | 3  | 3  | 4  | 4  | 4  | 6  | 4 | 3 | 3 | 3 | 0.91900 | 1.09    | 0.85612 | 1.00    | 0.45633 | 1.18    |      |
| sp Q9NZL0 SOG3_MOUSE      | Protein SOG3 OS=Mus musculus                    | OS=M   | 659.78  | 6  | 3  | 2  | 3  | 8  | 5  | 2  | 4  | 5  | 5  | 5  | 2 | 3 | 3 | 3 | 0.98834 | 1.07    | 0.79868 | 0.72    | 0.59824 | 1.14    |      |
| sp Q9BFZ9 ERLNL_MOUSE     | Erlin-2 OS=Mus musculus (Mouse) GN-Erlin        | OS=M   | 659.78  | 8  | 4  | 4  | 4  | 4  | 4  | 4  | 4  | 4  | 3  | 4  | 6 | 3 | 3 | 3 | 0.32705 | 0.75    | 0.46781 | 0.75    | 0.88226 | 0.81    |      |
| sp Q9ZZW0 DNPEP_MOUSE     | Aspartyl aminopeptidase OS=Mus musculus         | OS=M   | 865.13  | 7  | 2  | 4  | 2  | 5  | 4  | 4  | 4  | 4  | 4  | 4  | 3 | 3 | 3 | 3 | 0.60946 | 0.85    | 0.93544 | 0.92    | 0.89223 | 0.85    |      |
| sp Q9WU33 PYGM_MOUSE      | Glycogen phosphorylase, muscle form OS=         | OS=M   | 503.23  | 6  | 4  | 2  | 3  | 4  | 2  | 3  | 3  | 2  | 2  | 2  | 6 | 3 | 3 | 3 | 0.42000 | 0.75    | 0.52666 | 0.75    | 0.34944 | 0.58    |      |
| sp G9UX33 CSXKX_MOUSE     | Sialoprotein reductase OS=Mus musculus (I       | OS=M   | 675.57  | 6  | 2  | 3  | 4  | 5  | 4  | 1  | 3  | 6  | 2  | 2  | 6 | 3 | 3 | 3 | 0.74521 | 1.18    | 0.98457 | 0.91    | 0.93872 | 0.91    |      |
| sp Q9V8F8 STIM_MOUSE      | Protein stim homolog OS=Mus musculus (I         | OS=M   | 185.28  | 6  | 2  | 3  | 3  | 8  | 6  | 3  | 6  | 3  | 3  | 2  | 4 | 3 | 3 | 3 | 0.40778 | 0.94    | 0.33287 | 0.92    | 0.82828 | 0.88    |      |
| sp P35762 CD81_MOUSE      | CD81 antigen OS=Mus musculus (Mouse) I          | OS=M   | 275.93  | 6  | 2  | 1  | 4  | 4  | 4  | 7  | 3  | 2  | 5  | 3  | 3 | 3 | 3 | 3 | 0.62538 | 1.33    | 0.62583 | 1.33    | 0.96198 | 0.89    |      |
| sp Q9JK08 CEND1_MOUSE     | Cell cycle exit and neuronal differentiation p  | OS=M   | 577.39  | 6  | 4  | 4  | 13 | 5  | 1  | 8  | 1  | 9  | 1  | 9  | 1 | 2 | 2 | 2 | 0.56850 | 1.73    | 0.82441 | 0.82    | 0.94748 | 0.91    |      |
| sp P63040 CPLX1_MOUSE     | Complexin-1 OS=Mus musculus (Mouse) G           | OS=M   | 253.75  | 7  | 5  | 5  | 7  | 8  | 11 | 1  | 4  | 5  | 2  | 4  | 5 | 2 | 2 | 2 | 0.96902 | 1.00    | 0.47209 | 1.67    | 0.84614 | 0.75    |      |
| sp A2AGT5 CKAP5_MOUSE     | Cytoskeleton-associated protein 5 OS=Mus m      | OS=M   | 1027.57 | 6  | 3  | 3  | 5  | 2  | 2  | 9  | 3  | 2  | 2  | 2  | 1 | 2 | 3 | 3 | 0.82776 | 0.91    | 0.28776 | 0.73    | 0.62123 | 0.64    |      |
| sp P56959 FUS_MOUSE       | RNA-binding protein FUS OS=Mus musculus         | OS=M   | 575.79  | 6  | 1  | 4  | 1  | 1  | 6  | 1  | 4  | 3  | 2  | 2  | 2 | 2 | 2 | 2 | 0.77557 | 1.00    | 0.97908 | 1.00    | 0.92617 | 1.00    |      |
| sp Q9A065 CE170_MOUSE     | Centromeres protein of 170 kDa OS=Mus m         | OS=M   | 958.98  | 9  | 1  | 9  | 4  | 1  | 5  | 3  | 2  | 6  | 1  | 2  | 3 | 2 | 2 | 2 | 0.76521 | 1.40    | 0.98105 | 1.00    | 0.78958 | 0.70    |      |
| sp E0CZ72 E0CZ72_MOUSE    | Kinesin-like protein OS=Mus musculus (Mo        | OS=M   | 1448.5  | 5  | 14 | 11 | 11 | 14 | 12 | 10 | 7  | 9  | 12 | 10 | 8 | 3 | 3 | 3 | 0.52866 | 1.23    | 0.75799 | 0.87    | 0.65276 | 1.00    |      |
| sp P10655 CATR_MOUSE      | Cathepsin B OS=Mus musculus (Mouse) G           | OS=M   | 746.22  | 6  | 2  | 6  | 7  | 10 | 12 | 1  | 3  | 13 | 1  | 5  | 3 | 3 | 3 | 3 | 0.66733 | 1.28    | 0.80744 | 0.89    | 0.86465 | 1.06    |      |
| sp Q908M3 CY1_MOUSE       | Cytochrome c1 home protein OS=Mus muscu         | OS=M   | 519.39  | 7  | 10 | 11 | 8  | 11 | 8  | 11 | 6  | 5  | 11 | 5  | 3 | 3 | 3 | 3 | 0.70349 | 1.02    | 0.60714 | 0.92    | 0.60714 | 0.92    |      |
| sp Q9CFR4 RL17_MOUSE      | 60S ribosomal protein L17 OS=Mus muscu          | OS=M   | 786.22  | 5  | 6  | 7  | 8  | 12 | 13 | 11 | 6  | 5  | 11 | 6  | 4 | 3 | 3 | 3 | 0.03310 | 1.83    | 0.38505 | 1.22    | 0.42578 | 1.17    |      |
| sp Q9M800 CNRP1_MOUSE     | R1 cannabinoid receptor-interacting prot        | OS=M   | 587.47  | 5  | 10 | 10 | 9  | 14 | 12 | 9  | 6  | 3  | 10 | 4  | 4 | 3 | 3 | 3 | 0.23582 | 1.40    | 0.40075 | 0.72    | 0.49863 | 0.72    |      |
| sp Q90930 VDAC2_MOUSE     | Voltage-dependent anion-selective channe        | OS=M   | 813.13  | 3  | 6  | 10 | 8  | 9  | 9  | 13 | 4  | 7  | 12 | 4  | 4 | 3 | 3 | 3 | 0.42438 | 1.37    | 0.59119 | 1.26    | 0.70615 | 1.16    |      |
| sp Q9C966 ROA1_MOUSE      | Protein phosphatase 1 alpha OS=Mus muscu        | OS=M   | 1029.56 | 4  | 3  | 6  | 7  | 10 | 16 | 9  | 3  | 2  | 5  | 6  | 6 | 3 | 3 | 3 | 0.50939 | 0.94    | 0.23193 | 0.82    | 0.54328 | 0.72    |      |
| sp P53810 PIPNA_MOUSE     | Phosphatidylinositol transfer protein alpha I   | OS=M   | 793.04  | 5  | 9  | 6  | 9  | 10 | 6  | 10 | 2  | 7  | 2  | 5  | 3 | 3 | 3 | 3 | 0.44531 | 1.26    | 0.94987 | 0.95    | 0.43043 | 0.70    |      |
| sp P35278 RAB5C_MOUSE     | Ras-related protein Rab-5C OS=Mus muscu         | OS=M   | 986.83  | 5  | 9  | 10 | 6  | 6  | 9  | 10 | 5  | 6  | 5  | 5  | 6 | 3 | 3 | 3 | 0.50364 | 0.88    | 0.71154 | 0.88    | 0.31593 | 0.67    |      |
| sp Q90737 CSK21_MOUSE     | Casokin kinase II subunit alpha OS=Mus m        | OS=M   | 788.2   | 3  | 9  | 6  | 7  | 10 | 10 | 8  | 5  | 5  | 9  | 7  | 3 | 3 | 3 | 3 | 0.22237 | 1.50    | 0.87884 | 1.00    | 0.67196 | 1.06    |      |
| sp G9UX33 CSXKX_MOUSE     | Sialoprotein reductase OS=Mus musculus (I       | OS=M   | 675.57  | 6  | 2  | 3  | 4  | 5  | 4  | 1  | 3  | 6  | 2  | 2  | 6 | 3 |   |   |         |         |         |         |         |         |      |

|                        |                                                 |         |   |   |   |   |    |    |   |   |   |   |   |   |   |   |   |   |         |      |         |      |         |      |
|------------------------|-------------------------------------------------|---------|---|---|---|---|----|----|---|---|---|---|---|---|---|---|---|---|---------|------|---------|------|---------|------|
| sp P14685 PSM3_MOUSE   | 26S proteasome non-ATPase regulatory su         | 1140.19 | 5 | 5 | 3 | 2 | 10 | 10 | 5 | 4 | 6 | 6 | 3 | 4 | 3 | 3 | 3 | 3 | 0.36650 | 1.69 | 0.34017 | 1.15 | 0.61482 | 1.00 |
| sp Q9D172 ESI1_MOUSE   | ES1 protein homolog, mitochondrial OS=M         | 381.48  | 4 | 4 | 4 | 4 | 6  | 7  | 4 | 4 | 2 | 6 | 3 | 2 | 3 | 3 | 3 | 3 | 0.13940 | 1.42 | 0.15669 | 0.83 | 0.99162 | 0.92 |
| sp P17404 CHC1_MOUSE   | histone dehydrogenase [NAD] subunit 9a          | 687.04  | 4 | 4 | 4 | 3 | 6  | 7  | 4 | 4 | 2 | 6 | 3 | 1 | 3 | 3 | 3 | 3 | 0.11544 | 1.58 | 0.14600 | 0.73 | 0.75441 | 0.83 |
| sp Q9Z0N1 IFZ2_MOUSE   | Eukaryotic translation initiation factor 2 subu | 812.94  | 5 | 5 | 3 | 6 | 6  | 5  | 4 | 5 | 5 | 5 | 2 | 3 | 3 | 3 | 3 | 3 | 0.56200 | 1.29 | 0.55711 | 1.00 | 0.84525 | 0.86 |
| sp Q9JMA1 UBP1_MOUSE   | Ubiquitin carboxyl-terminal hydrolase 14 OS     | 1045.34 | 4 | 4 | 5 | 3 | 7  | 6  | 4 | 4 | 5 | 4 | 2 | 3 | 3 | 3 | 3 | 3 | 0.56924 | 1.23 | 0.70648 | 1.00 | 0.19689 | 0.69 |
| sp Q9D6J6 INDU2_MOUSE  | NADH dehydrogenase [ubiquinone] flavopon        | 351.51  | 5 | 4 | 5 | 3 | 6  | 6  | 5 | 3 | 2 | 4 | 2 | 2 | 3 | 3 | 3 | 3 | 0.97103 | 1.07 | 0.21473 | 0.71 | 0.05889 | 0.57 |
| sp P16054 KPC6_MOUSE   | Protein kinase C epsilon type OS=Mus musc       | 856.3   | 5 | 5 | 4 | 3 | 8  | 8  | 3 | 3 | 3 | 4 | 4 | 2 | 3 | 3 | 3 | 3 | 0.28961 | 1.58 | 0.26556 | 0.75 | 0.80789 | 0.83 |
| sp Q9D833 CHRB4_MOUSE  | Chaperone protein 100 kDa OS=Mus muscu          | 840.04  | 5 | 5 | 5 | 5 | 5  | 5  | 5 | 5 | 5 | 5 | 5 | 5 | 5 | 5 | 5 | 5 | 0.17740 | 1.67 | 0.76560 | 0.83 | 0.27847 | 1.17 |
| sp Q9D898 RBM3_MOUSE   | RNA-binding protein 3 OS=Mus musculus (M        | 337.73  | 3 | 3 | 3 | 3 | 3  | 3  | 3 | 3 | 3 | 1 | 6 | 3 | 4 | 3 | 3 | 3 | 0.14189 | 1.45 | 0.25842 | 0.64 | 0.25567 | 1.18 |
| sp O10717 PI2A_MOUSE   | Phosphatidylinositol 5-phosphate 4-kinase I     | 707.73  | 2 | 5 | 4 | 2 | 6  | 6  | 4 | 4 | 4 | 5 | 3 | 3 | 2 | 2 | 2 | 2 | 0.64087 | 1.27 | 0.95950 | 0.73 | 0.47625 | 1.09 |
| sp Q17076 ANXA7_MOUSE  | Annexin A7 OS=Mus musculus (Mouse) GN           | 802.84  | 5 | 4 | 5 | 4 | 6  | 6  | 7 | 7 | 6 | 7 | 5 | 4 | 3 | 3 | 3 | 3 | 0.46407 | 1.00 | 0.10548 | 1.00 | 0.10548 | 1.21 |
| sp P14045 ARF5_MOUSE   | ADP-ribosylation factor 5 OS=Mus muscu          | 676.46  | 4 | 5 | 4 | 3 | 6  | 5  | 8 | 2 | 2 | 6 | 2 | 5 | 3 | 3 | 3 | 3 | 0.92034 | 1.08 | 0.86949 | 0.92 | 0.71524 | 1.00 |
| sp Q9I036 PAK3_MOUSE   | Serine/threonine-protein kinase PAK 3 OS        | 932.32  | 5 | 4 | 3 | 3 | 6  | 5  | 6 | 4 | 4 | 5 | 7 | 4 | 3 | 3 | 3 | 3 | 0.49550 | 1.33 | 0.27732 | 1.17 | 0.20093 | 1.33 |
| sp Q9BV05 PPM1_MOUSE   | Protein phosphatase methyltransferase 1 OS      | 544.15  | 5 | 5 | 4 | 2 | 7  | 5  | 6 | 3 | 4 | 4 | 4 | 4 | 3 | 3 | 3 | 3 | 0.83343 | 1.00 | 0.82338 | 0.93 | 0.80658 | 0.86 |
| sp Q9D805 NSA1_MOUSE   | Alpha-soluble NSF attachment protein OS=M       | 864.94  | 3 | 3 | 3 | 3 | 7  | 3  | 6 | 3 | 2 | 2 | 5 | 2 | 3 | 3 | 3 | 3 | 0.16524 | 1.67 | 0.75842 | 1.11 | 0.41176 | 1.11 |
| sp P15655 GPC4_MOUSE   | Glycans OS=Mus musculus (Mouse) GN              | 570.77  | 3 | 3 | 3 | 3 | 3  | 3  | 3 | 3 | 3 | 3 | 3 | 3 | 3 | 3 | 3 | 3 | 0.41149 | 1.33 | 0.98486 | 1.00 | 0.75092 | 0.79 |
| sp Q9BQ21 HPC4_MOUSE   | Hippocampal-like protein 4 OS=Mus muscu         | 786.33  | 3 | 5 | 4 | 4 | 8  | 4  | 5 | 4 | 2 | 6 | 2 | 3 | 3 | 3 | 3 | 3 | 0.44555 | 1.33 | 0.87291 | 0.92 | 0.99379 | 0.92 |
| sp P10425 PRIO_MOUSE   | Major prion protein OS=Mus musculus (Mo         | 274.52  | 3 | 3 | 3 | 3 | 5  | 7  | 3 | 3 | 2 | 5 | 4 | 2 | 3 | 3 | 3 | 3 | 0.08685 | 1.55 | 0.29063 | 0.73 | 0.68731 | 1.00 |
| sp Q9C089 QCR6_MOUSE   | Histone H2-b1 complex subunit 8 OS=M            | 204.93  | 3 | 3 | 3 | 2 | 5  | 6  | 4 | 5 | 3 | 4 | 3 | 4 | 3 | 3 | 3 | 3 | 0.02333 | 1.88 | 0.04761 | 1.50 | 0.02622 | 1.38 |
| sp Q9D123 VGLN_MOUSE   | Vglin OS=Mus musculus (Mouse) GN=Htd            | 721.67  | 2 | 2 | 3 | 2 | 6  | 5  | 2 | 2 | 2 | 5 | 3 | 2 | 3 | 3 | 3 | 3 | 0.19499 | 1.66 | 0.59608 | 0.86 | 0.18593 | 1.43 |
| sp Q9D073 IRBP7_MOUSE  | Oocyte-binding protein IRBP7 OS=Mus m           | 371.66  | 3 | 3 | 3 | 2 | 7  | 2  | 3 | 3 | 4 | 4 | 2 | 3 | 3 | 3 | 3 | 3 | 0.78875 | 1.22 | 0.27743 | 1.22 | 0.63085 | 1.00 |
| sp Q9C230 OLA1_MOUSE   | Obg-like ATPase 1 OS=Mus musculus (Mo           | 697.27  | 4 | 3 | 4 | 5 | 6  | 3  | 4 | 4 | 4 | 3 | 1 | 4 | 3 | 3 | 3 | 3 | 0.44531 | 1.27 | 0.29329 | 1.09 | 0.55657 | 0.73 |
| sp Q9I013 NFASC_MOUSE  | Neurofascin OS=Mus musculus (Mouse) GF          | 707.91  | 3 | 3 | 4 | 4 | 6  | 4  | 5 | 2 | 3 | 4 | 1 | 1 | 3 | 3 | 3 | 3 | 0.17148 | 1.40 | 0.92155 | 1.00 | 0.29210 | 0.60 |
| sp Q9C4V1 GLGD_MOUSE   | Glyoxalase domain-containing protein 4 OS       | 699.22  | 3 | 3 | 5 | 5 | 7  | 5  | 3 | 1 | 2 | 4 | 1 | 3 | 3 | 3 | 3 | 3 | 0.12315 | 1.55 | 0.13869 | 0.55 | 0.52325 | 0.73 |
| sp P148678 LINA_MOUSE  | Leucine-rich repeat and immunoglobulin-li       | 810.12  | 3 | 5 | 5 | 5 | 5  | 5  | 5 | 5 | 5 | 5 | 5 | 5 | 5 | 5 | 5 | 5 | 0.09975 | 1.60 | 0.71737 | 0.87 | 0.93491 | 0.80 |
| sp Q9I401 CRK_MOUSE    | Adaptor molecule crk OS=Mus musculus (M         | 396.15  | 2 | 4 | 2 | 2 | 3  | 6  | 5 | 1 | 4 | 2 | 2 | 3 | 2 | 2 | 2 | 2 | 0.13301 | 1.75 | 0.46661 | 0.63 | 0.70596 | 0.75 |
| sp Q9D019 NRRL2_MOUSE  | Heterogeneous nuclear ribonucleoprotein         | 1009.1  | 4 | 4 | 3 | 4 | 6  | 5  | 4 | 8 | 3 | 3 | 3 | 3 | 3 | 3 | 3 | 3 | 0.09843 | 1.36 | 0.77397 | 1.00 | 0.19141 | 0.73 |
| sp Q3U164 G3U1_MOUSE   | Putative uncharacterized protein OS=Mus l       | 550     | 4 | 4 | 3 | 4 | 5  | 6  | 6 | 6 | 5 | 4 | 6 | 5 | 3 | 3 | 3 | 3 | 0.12094 | 1.36 | 0.00999 | 1.55 | 0.11442 | 1.36 |
| sp Q35226 PSMD4_MOUSE  | 26S proteasome non-ATPase regulatory su         | 565.88  | 5 | 5 | 5 | 5 | 5  | 5  | 5 | 5 | 5 | 5 | 5 | 5 | 5 | 5 | 5 | 5 | 0.16901 | 1.40 | 0.96801 | 1.00 | 0.27667 | 1.50 |
| sp Q9B2627 DLR1_MOUSE  | Dynactin light chain roadblock protein 1 OS     | 356.71  | 5 | 5 | 4 | 4 | 5  | 8  | 3 | 6 | 6 | 7 | 5 | 4 | 3 | 3 | 3 | 3 | 0.55644 | 1.21 | 0.59786 | 1.00 | 0.13944 | 1.14 |
| sp Q9C0927 FIS1_MOUSE  | Mitochondrial fission 1 protein OS=Mus m        | 622.17  | 2 | 3 | 4 | 3 | 4  | 6  | 7 | 1 | 5 | 6 | 1 | 2 | 3 | 3 | 3 | 3 | 0.33273 | 1.44 | 0.47400 | 1.44 | 0.91299 | 1.00 |
| sp P184089 ERH_MOUSE   | Enhancer of rudimentary homolog OS=Mus          | 427.68  | 2 | 3 | 2 | 2 | 4  | 6  | 7 | 1 | 2 | 4 | 1 | 1 | 3 | 3 | 3 | 3 | 0.25337 | 1.71 | 0.59600 | 1.43 | 0.85447 | 0.86 |
| sp Q9C2203 RBM14_MOUSE | RNA-binding protein 14 OS=Mus muscu             | 637.43  | 5 | 5 | 2 | 3 | 3  | 6  | 8 | 1 | 1 | 5 | 4 | 1 | 3 | 3 | 3 | 3 | 0.50289 | 1.33 | 0.91968 | 1.11 | 0.69122 | 1.11 |
| sp Q9I0529 PYC_MOUSE   | Pyruvate carboxylase, mitochondrial OS=M        | 932.4   | 4 | 4 | 4 | 4 | 4  | 4  | 5 | 5 | 5 | 5 | 5 | 5 | 5 | 5 | 5 | 5 | 0.05545 | 1.95 | 0.05545 | 1.00 | 0.05545 | 1.00 |
| sp Q9E020 MMSA_MOUSE   | Methylmalonate-semialdehyde dehydrogen          | 591.56  | 5 | 5 | 4 | 5 | 4  | 7  | 4 | 5 | 8 | 3 | 5 | 7 | 3 | 3 | 3 | 3 | 0.64885 | 1.14 | 0.39202 | 1.21 | 0.50066 | 1.07 |
| sp Q35136 NCAM2_MOUSE  | Neural cell adhesion molecule 2 OS=Mus n        | 995.1   | 4 | 4 | 3 | 3 | 5  | 9  | 3 | 5 | 9 | 1 | 3 | 8 | 3 | 3 | 3 | 3 | 0.36153 | 1.55 | 0.29731 | 1.55 | 0.69317 | 1.09 |
| sp Q9R191 SNQ3_MOUSE   | Synaptotagmin-3 OS=Mus musculus (Mouse          | 180.12  | 4 | 4 | 2 | 4 | 5  | 7  | 5 | 3 | 4 | 6 | 2 | 6 | 3 | 3 | 3 | 3 | 0.15588 | 1.60 | 0.31122 | 1.20 | 0.28931 | 1.40 |
| sp Q9I216 PLC1_MOUSE   | 1-phosphatidylinositol 3-bisphosphate ph        | 177.46  | 3 | 3 | 3 | 3 | 3  | 3  | 3 | 3 | 3 | 3 | 3 | 3 | 3 | 3 | 3 | 3 | 0.02117 | 1.23 | 0.95238 | 1.00 | 0.27401 | 1.23 |
| sp Q9I3X7 PSMD1_MOUSE  | 26S proteasome non-ATPase regulatory su         | 1111.44 | 3 | 4 | 4 | 2 | 6  | 6  | 4 | 3 | 4 | 3 | 3 | 4 | 3 | 3 | 3 | 3 | 0.73307 | 1.18 | 0.67991 | 1.00 | 0.82442 | 0.91 |
| sp Q9R0P3 ESTD_MOUSE   | S-formylglutathione hydrolase OS=Mus m          | 497.75  | 2 | 4 | 4 | 3 | 5  | 7  | 3 | 5 | 5 | 5 | 3 | 4 | 4 | 3 | 3 | 3 | 0.31780 | 1.50 | 0.30247 | 1.30 | 0.38187 | 1.10 |
| sp P162267 RS23_MOUSE  | 40S ribosomal protein S23 OS=Mus muscu          | 391.53  | 4 | 3 | 3 | 4 | 2  | 6  | 3 | 3 | 3 | 5 | 3 | 3 | 3 | 3 | 3 | 3 | 0.68736 | 1.20 | 0.55021 | 1.10 | 0.41402 | 1.10 |
| sp P123116 EIF3A_MOUSE | Eukaryotic translation initiation factor 3 sub  | 1364.08 | 5 | 5 | 4 | 3 | 4  | 6  | 4 | 3 | 3 | 3 | 5 | 2 | 2 | 3 | 3 | 3 | 0.55089 | 0.93 | 0.02037 | 0.71 | 0.19506 | 0.64 |
| sp Q9D807 PRDX4_MOUSE  | Peroxiredoxin-4 OS=Mus musculus (Mouse)         | 286.26  | 2 | 2 | 2 | 2 | 2  | 2  | 2 | 2 | 2 | 2 | 2 | 2 | 2 | 2 | 2 | 2 | 0.26537 | 1.71 | 0.11027 | 0.38 | 0.52741 | 0.80 |
| sp Q9JUL5 CUL3_MOUSE   | Cullin-3 OS=Mus musculus (Mouse) GN=C           | 823.51  | 3 | 2 | 2 | 2 | 2  | 2  | 3 | 2 | 1 | 2 | 2 | 2 | 2 | 2 | 2 | 2 | 0.38003 | 1.57 | 0.88009 | 0.86 | 0.88007 | 0.86 |
| sp Q9D104 TMEDA_MOUSE  | Transmembrane emp24 domain-containing           | 445.73  | 4 | 5 | 2 | 2 | 4  | 4  | 6 | 7 | 6 | 3 | 3 | 4 | 3 | 3 | 3 | 3 | 0.64714 | 0.91 | 0.04235 | 1.73 | 0.86564 | 0.91 |
| sp P13944 ESPV4_MOUSE  | ATPase inhibitor, mitochondrial OS=Mus m        | 379.47  | 4 | 4 | 5 | 4 | 3  | 5  | 6 | 3 | 7 | 4 | 2 | 5 | 3 | 3 | 3 | 3 | 0.28283 | 0.86 | 0.51104 | 1.14 | 0.63307 | 0.79 |
| sp Q9ZNL51 ISG3A_MOUSE | Interferon-stimulated gene 3 OS=Mus musc        | 713.43  | 4 | 4 | 4 | 4 | 4  | 4  | 4 | 4 | 4 | 4 | 4 | 4 | 4 | 4 | 4 | 4 | 0.05822 | 1.00 | 0.05822 | 1.00 | 0.05822 | 1.00 |
| sp P30416 FKBP4_MOUSE  | Peptidyl-prolyl cis-trans isomerase FKBP4 (     | 698.38  | 4 | 4 | 3 | 4 | 5  | 4  | 9 | 3 | 4 | 6 | 2 | 5 | 3 | 3 | 3 | 3 | 0.27219 | 1.18 | 0.32565 | 1.45 | 0.39764 | 1.18 |
| sp P57776 EF1D_MOUSE   | Protein elongation factor 1-delta OS=Mus mu     | 468.92  | 5 | 5 | 2 | 4 | 4  | 2  | 6 | 4 | 2 | 6 | 3 | 1 | 3 | 3 | 3 | 3 | 0.69481 | 0.91 | 0.72167 | 1.09 | 0.92192 | 0.91 |
| sp Q9I0713 BAX_MOUSE   | Apoptosis regulator BAX OS=Mus muscu            | 639.02  | 4 | 4 | 4 | 4 | 2  | 3  | 7 | 3 | 3 | 3 | 2 | 2 | 3 | 3 | 3 | 3 | 0.13125 | 0.69 | 0.93985 | 1.00 | 0.01799 | 0.54 |
| sp Q9D228 VPS29_MOUSE  | Vacuolar protein sorting-associated protein     | 322.53  | 2 | 2 | 2 | 2 | 2  | 2  | 2 | 2 | 2 | 2 | 2 | 2 | 2 | 2 | 2 | 2 | 0.47328 | 1.25 | 0.40071 | 1.38 | 0.58760 | 0.75 |
| sp P109671 ISOM_MOUSE  | Isomerase OS=Mus musculus (Mouse) GN            | 320.48  | 4 | 4 | 4 | 4 | 4  | 4  | 4 | 4 | 4 | 4 | 4 | 4 | 4 | 4 | 4 | 4 | 0.11027 | 1.38 | 0.11027 | 1.38 | 0.11027 | 1.38 |
| sp P12774 MTFN_MOUSE   | Myotroph                                        |         |   |   |   |   |    |    |   |   |   |   |   |   |   |   |   |   |         |      |         |      |         |      |



|                        |                                                 |         |   |   |   |   |   |   |   |   |   |   |   |   |         |         |         |         |         |         |      |
|------------------------|-------------------------------------------------|---------|---|---|---|---|---|---|---|---|---|---|---|---|---------|---------|---------|---------|---------|---------|------|
| sp Q9JMG7 HDGR3_MOUSE  | Hepatoma-derived growth factor-related pro      | 289.37  | 3 | 1 | 2 | 1 | 1 | 2 | 3 | 1 | 2 | 2 | 2 | 2 | 2       | 0.76640 | 0.75    | 0.89330 | 0.75    | 0.95367 | 1.00 |
| sp Q56926 TR150_MOUSE  | Thyroid hormone receptor-associated protein     | 307.43  | 4 | 1 | 3 | 3 | 3 | 1 | 2 | 1 | 2 | 1 | 3 | 2 | 1       | 0.70133 | 0.80    | 0.98440 | 1.00    | 0.88375 | 0.60 |
| sp Q3C9F3 SSRG_MOUSE   | Transcobalamin-associated protein subunit gamma | 144.05  | 2 | 1 | 1 | 1 | 2 | 1 | 1 | 1 | 1 | 2 | 3 | 3 | 0.69553 | 1.33    | 0.82677 | 0.67    | 0.91671 | 1.00    |      |
| sp Q8BH66 JATL1_MOUSE  | Atlastin-1 OS=Mus musculus (Mouse) GN=          | 594.54  | 2 | 1 | 1 | 1 | 2 | 3 | 1 | 1 | 1 | 1 | 1 | 2 | 0.94277 | 1.00    | 0.96440 | 1.00    | 0.72684 | 0.67    |      |
| sp Q9R0H0 ACOX1_MOUSE  | Peroxisomal acyl-coenzyme A oxidase 1 C         | 670.62  | 3 | 4 | 2 | 3 | 5 | 3 | 1 | 5 | 2 | 4 | 2 | 3 | 0.62686 | 1.43    | 0.68526 | 1.29    | 0.66580 | 1.14    |      |
| sp G3X972 G3X972_MOUSE | Protein Sec24 OS=Mus musculus (Mouse)           | 495.05  | 2 | 4 | 4 | 4 | 2 | 1 | 3 | 1 | 3 | 3 | 1 | 2 | 0.44796 | 1.67    | 0.80777 | 0.83    | 0.70186 | 1.17    |      |
| sp Q3C54 CENPY_MOUSE   | Centromere protein V OS=Mus musculus (M         | 344.07  | 2 | 2 | 2 | 2 | 3 | 1 | 2 | 3 | 2 | 2 | 2 | 3 | 0.31088 | 1.75    | 0.80231 | 0.75    | 0.15151 | 1.75    |      |
| sp Q3JUF7 COPR_MOUSE   | Centromere subunit beta OS=Mus musculus         | 484.95  | 3 | 4 | 2 | 2 | 4 | 2 | 2 | 2 | 4 | 2 | 3 | 2 | 0.49456 | 1.40    | 0.84008 | 1.00    | 0.89150 | 0.60    |      |
| sp Q17M36 CSPG5_MOUSE  | Chondroitin sulfate proteoglycan 5 OS=Mu        | 449.78  | 3 | 2 | 3 | 5 | 1 | 3 | 1 | 2 | 1 | 1 | 2 | 3 | 0.45065 | 1.80    | 0.91992 | 1.00    | 0.95920 | 1.00    |      |
| sp Q8BWY3 IERF1_MOUSE  | Eukaryotic peptide chain release factor sub     | 342.29  | 2 | 2 | 2 | 2 | 2 | 1 | 2 | 1 | 2 | 2 | 2 | 3 | 0.76206 | 1.25    | 0.63754 | 1.25    | 0.93052 | 1.00    |      |
| sp Q3C2W4 ACSLS3_MOUSE | Long-chain fatty acyl-CoA ligase 3 OS=M         | 569.18  | 3 | 1 | 2 | 1 | 4 | 1 | 5 | 1 | 1 | 1 | 2 | 2 | 0.90716 | 1.25    | 0.55264 | 1.75    | 0.90006 | 0.75    |      |
| sp Q9P962 HM2_MOUSE    | Nucleosome chromatin protein HM200              | 213.73  | 2 | 2 | 2 | 2 | 4 | 2 | 2 | 2 | 3 | 1 | 1 | 2 | 0.85103 | 1.40    | 0.82539 | 1.00    | 0.85103 | 0.60    |      |
| sp Q3JZ22 SYN3_MOUSE   | Synapsin-3 OS=Mus musculus (Mouse) GN           | 449.74  | 2 | 2 | 2 | 3 | 2 | 2 | 2 | 2 | 2 | 1 | 2 | 1 | 0.68028 | 1.67    | 0.76621 | 0.67    | 0.78864 | 0.67    |      |
| sp O8997 ATOX1_MOUSE   | Copper transport protein ATOX1 OS=Mus           | 121.45  | 2 | 3 | 2 | 1 | 1 | 3 | 2 | 2 | 1 | 1 | 2 | 1 | 0.74873 | 1.50    | 0.82654 | 1.00    | 0.92924 | 1.00    |      |
| sp Q3U9H9 AGAP2_MOUSE  | Arf-GAP with GTPase, ANK repeat and PH          | 377.84  | 2 | 1 | 2 | 1 | 1 | 2 | 1 | 1 | 2 | 1 | 2 | 2 | 0.76646 | 1.50    | 0.97860 | 1.00    | 0.99229 | 1.00    |      |
| sp P17056 HMG2_MOUSE   | High mobility group protein HMG-HMG-2           | 86.92   | 2 | 1 | 1 | 1 | 2 | 3 | 1 | 2 | 1 | 1 | 2 | 1 | 0.96818 | 1.00    | 0.96559 | 1.00    | 0.80194 | 1.50    |      |
| sp Q8I029 AP2B_MOUSE   | Lamine-associated polypeptide 2 isoform         | 430.11  | 2 | 1 | 2 | 1 | 1 | 2 | 2 | 2 | 2 | 1 | 1 | 2 | 0.52394 | 1.00    | 0.76824 | 0.67    | 0.68350 | 1.00    |      |
| sp Q8Z1F9 SAE2_MOUSE   | MuMO-activating enzyme subunit 2 OS=M           | 531.95  | 4 | 2 | 2 | 1 | 3 | 1 | 1 | 3 | 3 | 1 | 1 | 2 | 0.78358 | 0.75    | 0.98402 | 1.00    | 0.84412 | 0.75    |      |
| sp Q8BG51 MIRO1_MOUSE  | Mitochondrial Rho GTPase 1 OS=Mus mus           | 341.2   | 2 | 1 | 2 | 2 | 1 | 1 | 2 | 1 | 2 | 1 | 2 | 2 | 0.77885 | 1.50    | 0.97860 | 1.00    | 0.99229 | 1.00    |      |
| sp Q9Z051 BPN1_MOUSE   | 3'(2')5'-cyclic phosphate nucleotidase 1 OS=    | 395.57  | 3 | 1 | 1 | 1 | 2 | 2 | 2 | 1 | 2 | 1 | 2 | 2 | 0.72977 | 0.67    | 0.72061 | 1.33    | 0.88142 | 1.00    |      |
| sp Q9N7F9 COPF_MOUSE   | Cleavage and polyadenylation specificity fa     | 297.36  | 3 | 3 | 1 | 1 | 1 | 2 | 2 | 1 | 1 | 2 | 1 | 2 | 0.72977 | 0.67    | 0.92822 | 1.00    | 0.88142 | 1.00    |      |
| sp P58395 CYB5_MOUSE   | Cytochrome b5 OS=Mus musculus (Mouse)           | 346.26  | 2 | 1 | 3 | 3 | 1 | 2 | 2 | 2 | 2 | 1 | 1 | 2 | 0.82617 | 1.50    | 0.70632 | 1.50    | 0.91525 | 1.00    |      |
| sp P63087 PP1G_MOUSE   | Serine/threonine-protein phosphatase PP1-       | 1017.14 | 1 | 8 | 4 | 3 | 8 | 7 | 6 | 2 | 2 | 8 | 3 | 3 | 0.59164 | 1.38    | 0.70988 | 0.77    | 0.75848 | 1.08    |      |
| sp Q55125 NIP51_MOUSE  | Protein Nip5 homolog 1 OS=Mus muscu             | 465.74  | 1 | 6 | 5 | 4 | 6 | 3 | 6 | 3 | 2 | 4 | 3 | 3 | 0.94071 | 1.08    | 0.90868 | 0.92    | 0.84222 | 0.83    |      |
| sp P62901 RL1_MOUSE    | 60S ribosomal protein L31 OS=Mus muscu          | 358.82  | 1 | 3 | 3 | 6 | 5 | 2 | 5 | 3 | 3 | 2 | 4 | 3 | 0.25670 | 1.86    | 0.72799 | 1.14    | 0.32564 | 1.29    |      |
| sp Q3JAS2 Q3JAS2_MOUSE | Electron transfer flavoprotein-ubiquinone o     | 624.34  | 1 | 4 | 2 | 2 | 6 | 2 | 6 | 2 | 6 | 2 | 1 | 3 | 0.59933 | 1.43    | 0.68707 | 0.86    | 0.47620 | 1.14    |      |
| sp Q921G7 ETFD_MOUSE   | EH domain-containing protein 3 OS=Mu            | 757.61  | 1 | 4 | 4 | 3 | 5 | 3 | 6 | 3 | 3 | 4 | 4 | 3 | 0.69502 | 1.22    | 0.42073 | 1.33    | 0.20769 | 1.33    |      |
| sp Q921Y6 EHD3_MOUSE   | Valine-tRNA ligase OS=Mus musculus (Mo          | 1077.41 | 1 | 2 | 5 | 4 | 4 | 3 | 5 | 4 | 3 | 3 | 1 | 4 | 0.56883 | 1.38    | 0.32634 | 1.50    | 0.86620 | 1.00    |      |
| sp Q9P681 HMOX_MOUSE   | NAD(P)-dependent oxidoreductase OS=Mu           | 563.92  | 1 | 2 | 2 | 2 | 4 | 2 | 2 | 2 | 2 | 3 | 1 | 3 | 0.68552 | 1.63    | 0.82204 | 1.00    | 0.82204 | 1.00    |      |
| sp Q9DBL1 ACD5B_MOUSE  | Short-branched chain specific acyl-CoA deH      | 522.52  | 1 | 2 | 4 | 4 | 2 | 2 | 3 | 1 | 3 | 2 | 3 | 3 | 0.85275 | 1.14    | 0.95415 | 1.00    | 0.96355 | 0.86    |      |
| sp Q9XJY5 COPD_MOUSE   | Centromere subunit delta OS=Mus muscu           | 481.84  | 1 | 2 | 2 | 2 | 4 | 2 | 1 | 1 | 2 | 1 | 1 | 3 | 0.26121 | 1.60    | 0.52681 | 0.80    | 0.41271 | 1.33    |      |
| sp B2R08 B2R08_MOUSE   | Spectrin beta 1 OS=Mus musculus (Mouse)         | 388.79  | 1 | 2 | 2 | 3 | 3 | 2 | 3 | 1 | 2 | 1 | 2 | 1 | 0.13679 | 1.60    | 0.72018 | 0.80    | 0.42628 | 0.60    |      |
| sp Q88741 GDAF1_MOUSE  | Ganglioside-induced differentiation-associat    | 355.5   | 1 | 4 | 4 | 2 | 2 | 4 | 4 | 2 | 2 | 2 | 2 | 3 | 0.71836 | 0.89    | 0.53562 | 0.67    | 0.51559 | 0.67    |      |
| sp Q9T023 ALX_MOUSE    | Putative tyrosine-protein phosphatase auxil     | 622.17  | 1 | 2 | 3 | 4 | 2 | 1 | 2 | 1 | 1 | 1 | 1 | 2 | 0.10689 | 1.60    | 0.35475 | 0.60    | 0.46268 | 0.60    |      |
| sp Q9I086 ANFY1_MOUSE  | Rabkynin-5 OS=Mus musculus (Mouse) C            | 304.88  | 1 | 2 | 2 | 3 | 1 | 2 | 2 | 3 | 1 | 2 | 2 | 3 | 0.70906 | 1.20    | 0.56920 | 1.20    | 0.83987 | 0.80    |      |
| sp Q9C0H3 INDUB5_MOUSE | NADH dehydrogenase [ubiquinone] 1 beta          | 154.62  | 1 | 2 | 3 | 1 | 3 | 3 | 5 | 2 | 2 | 3 | 1 | 3 | 0.83994 | 1.17    | 0.85143 | 1.17    | 0.58860 | 0.67    |      |
| sp Q9Z09 DCTN5_MOUSE   | Dynactin subunit 5 OS=Mus musculus (Mo          | 278.89  | 1 | 2 | 1 | 1 | 2 | 2 | 2 | 2 | 1 | 1 | 2 | 2 | 0.43271 | 0.80    | 0.86220 | 1.00    | 0.65413 | 1.00    |      |
| sp Q7M0F3 G7M0F3_MOUSE | Glycylglycyl transferase class mu chain Ya5     | 171.62  | 1 | 2 | 2 | 1 | 2 | 2 | 2 | 1 | 1 | 2 | 2 | 3 | 0.92648 | 1.00    | 0.91612 | 1.00    | 0.73962 | 1.33    |      |
| sp Q9R1R2 TPM_MOUSE    | Tropomyosin alpha-4 chain OS=Mus muscu          | 279.83  | 1 | 2 | 2 | 1 | 1 | 2 | 3 | 1 | 2 | 2 | 1 | 3 | 0.43271 | 0.80    | 0.84767 | 1.20    | 0.41271 | 0.60    |      |
| sp E901Z0 E901Z0_MOUSE | Protein 4732456N10Rk OS=Mus muscu               | 308.35  | 1 | 3 | 2 | 1 | 5 | 2 | 2 | 2 | 6 | 2 | 1 | 4 | 0.96324 | 1.00    | 0.37489 | 1.67    | 0.60592 | 1.17    |      |
| sp Q9D023 MPC2_MOUSE   | Mitochondrial pyruvate carrier 2 OS=Mu          | 261.43  | 1 | 3 | 2 | 2 | 3 | 2 | 3 | 2 | 3 | 1 | 3 | 2 | 0.66908 | 0.83    | 0.77610 | 0.83    | 0.60063 | 0.67    |      |
| sp P69566 RANB9_MOUSE  | Ran-binding protein S24 OS=Mus muscu            | 172.9   | 1 | 2 | 2 | 2 | 1 | 1 | 1 | 1 | 2 | 3 | 2 | 2 | 0.29628 | 0.60    | 0.14585 | 0.60    | 0.55478 | 0.60    |      |
| sp Q55100 GN01_MOUSE   | Dynactin-1 OS=Mus musculus (Mouse) C            | 243.64  | 1 | 2 | 1 | 2 | 2 | 2 | 2 | 2 | 1 | 1 | 1 | 3 | 0.31439 | 1.00    | 0.31439 | 1.00    | 0.44858 | 0.60    |      |
| sp Q92376 RU17_MOUSE   | U1 small nuclear ribonucleoprotein 70 kDa       | 356.03  | 1 | 3 | 1 | 2 | 2 | 2 | 2 | 2 | 2 | 1 | 3 | 3 | 0.12857 | 1.50    | 0.06940 | 1.50    | 0.27277 | 1.50    |      |
| sp Q9G749 KHDIR1_MOUSE | KH domain-containing, RNA-binding, signal       | 485.03  | 1 | 3 | 1 | 2 | 4 | 3 | 1 | 5 | 3 | 1 | 3 | 3 | 0.20088 | 1.80    | 0.34418 | 1.80    | 0.26642 | 1.80    |      |
| sp P65771 TYH3_MOUSE   | Protein tyrosine hydroxylase OS=Mus muscu       | 363.83  | 1 | 2 | 1 | 2 | 2 | 2 | 2 | 1 | 2 | 3 | 3 | 3 | 0.12857 | 1.50    | 0.39090 | 1.25    | 0.17001 | 1.75    |      |
| sp P61957 AP151_MOUSE  | AP-1 complex subunit 1 OS=Mus muscu             | 282.25  | 1 | 2 | 1 | 2 | 2 | 2 | 2 | 1 | 1 | 1 | 2 | 2 | 0.75476 | 1.75    | 0.91676 | 1.75    | 0.92762 | 1.00    |      |
| sp Q9C0V3 RBMA8_MOUSE  | RNA-binding protein 8A OS=Mus muscu             | 211.17  | 1 | 2 | 2 | 2 | 2 | 1 | 1 | 1 | 1 | 1 | 1 | 3 | 0.12857 | 1.50    | 0.44287 | 0.75    | 0.58760 | 0.75    |      |
| sp F6ZU0 F6ZU0_MOUSE   | Elongation factor 1-delta OS=Mus muscu          | 377.84  | 1 | 3 | 1 | 2 | 3 | 1 | 3 | 2 | 2 | 4 | 2 | 1 | 0.67657 | 1.20    | 0.29286 | 1.40    | 0.42599 | 1.40    |      |
| sp Q9WV3 KCD12_MOUSE   | BTB/POZ domain-containing protein KCD12         | 115.48  | 1 | 3 | 1 | 2 | 3 | 1 | 2 | 2 | 2 | 2 | 2 | 3 | 0.76757 | 1.20    | 0.79966 | 0.80    | 0.85312 | 0.80    |      |
| sp P62849 RS2A_MOUSE   | 40S ribosomal protein S24 OS=Mus muscu          | 311.53  | 1 | 3 | 1 | 4 | 2 | 2 | 2 | 1 | 2 | 1 | 2 | 3 | 0.62451 | 1.20    | 0.71563 | 0.80    | 0.75847 | 1.00    |      |
| sp E9P0Z2 E9P0Z2_MOUSE | Ubiquitin-protein ligase E3 OS=Mus muscu        | 528.92  | 1 | 3 | 1 | 2 | 1 | 1 | 2 | 1 | 1 | 1 | 1 | 3 | 0.48952 | 1.00    | 0.48952 | 1.00    | 0.48958 | 0.60    |      |
| sp Q9QUP5 HPLN1_MOUSE  | Hyaluronan and proteoglycan link protein 1      | 777.79  | 1 | 3 | 1 | 2 | 1 | 1 | 4 | 1 | 2 | 1 | 1 | 3 | 0.48071 | 0.60    | 0.99789 | 1.00    | 0.54117 | 0.60    |      |
| sp Q9I074 PPM1G_MOUSE  | Protein phosphatase 1G OS=Mus muscu             | 344.4   | 1 | 2 | 1 | 1 | 5 | 1 | 2 | 2 | 2 | 2 | 1 | 3 | 0.52851 | 1.75    | 0.06940 | 1.50    | 0.30971 | 1.25    |      |
| sp Q8B2M2 SYLC_MOUSE   | Leucine-tRNA ligase, cytoplasmic OS=Mu          | 830.91  | 1 | 3 | 1 | 1 | 4 | 1 | 2 | 2 | 3 | 1 | 2 | 3 | 0.84780 | 1.20    | 0.32418 | 1.40    | 0.60393 | 0.60    |      |
| sp Q35114 H3CB2_MOUSE  | 3-methylcrotonyl-CoA carboxylase mu             | 260.32  | 1 | 3 | 1 | 1 | 4 | 1 | 4 | 1 | 1 | 3 | 1 | 3 | 0.80534 | 1.67    | 0.50634 | 1.67    | 0.42919 | 1.05    |      |
| sp P35282 RAB21_MOUSE  | Ras-related protein Rab-21 OS=Mus muscu         | 408.89  | 1 | 1 | 1 | 1 | 4 | 1 | 3 | 2 | 1 | 1 | 1 | 3 | 0.84780 | 1.20    | 0.57105 | 0.60    | 0.81058 | 0.80    |      |
| sp Q8BT38 Q8BT3_MOUSE  | Putative uncharacterized protein OS=Mu          | 484.53  | 1 | 2 | 1 | 1 | 3 | 1 | 1 | 1 | 2 | 2 | 2 | 3 | 0.72382 | 1.25    | 0.44287 | 0.75    | 0.87718 | 1.00    |      |
| sp P61122 RUVB1_MOUSE  | RuvB-1 OS=Mus musculus (Mouse) GN               | 486.55  | 1 | 2 | 1 | 1 | 1 | 1 | 2 | 1 | 1 | 2 | 1 | 3 | 0.29407 | 0.75    | 0.89976 | 1.00    | 0.72884 |         |      |

**Table S2. Gene Ontology classification of differentially expressed, rescued proteins.**

| Category  | Term          | Count | %          | PValue     | Proteins                              | List Total | Pop Hits | Pop Total | Fold Enrichm | Bonferroni | Benjamini  | FDR        |
|-----------|---------------|-------|------------|------------|---------------------------------------|------------|----------|-----------|--------------|------------|------------|------------|
| GOTERM_M  | GO:0000166    | 14    | 50         | 1.66E-06   | Q9CW03, Q99020, Q91ZR1, Q921F4, P30   | 28         | 1936     | 17446     | 4.50568182   | 1.64E-04   | 1.64E-04   | 0.00183826 |
| INTERPRO  | IPRO27417:P   | 9     | 32.1428571 | 1.47E-05   | Q9CW03, Q91ZR1, P21278, S4R232, P306  | 28         | 909      | 20594     | 7.28217822   | 0.00127464 | 0.00127464 | 0.01584308 |
| UP_KEYWOR | Nucleotide-b  | 11    | 39.2857143 | 1.85E-05   | P05132, Q9CW03, Q91ZR1, Q99PU5, P21   | 28         | 1754     | 22680     | 5.07981756   | 0.00203303 | 0.00203303 | 0.02090064 |
| UP_KEYWOR | GTP-binding   | 6     | 21.4285714 | 4.04E-05   | Q91ZR1, P21278, S4R232, P30677, P352E | 28         | 332      | 22680     | 14.6385542   | 0.00443471 | 0.00221982 | 0.04564041 |
| UP_SEQ_FE | nucleotide.pl | 6     | 21.4285714 | 6.70E-05   | Q91ZR1, P21278, S4R232, P30677, P352E | 26         | 319      | 18012     | 13.0301423   | 0.006216   | 0.006216   | 0.07337298 |
| GOTERM_M  | GO:0005525    | 6     | 21.4285714 | 2.69E-04   | Q91ZR1, P21278, S4R232, P30677, P352E | 28         | 383      | 17446     | 9.76091011   | 0.02630855 | 0.01324195 | 0.29789629 |
| UP_KEYWOR | Phosphoprot   | 19    | 67.8571429 | 4.48E-04   | Q9DCN2, Q9CW03, Q99020, P21126, Q91   | 28         | 7617     | 22680     | 2.0204805    | 0.04813435 | 0.01630933 | 0.50540779 |
| UP_KEYWOR | Acetylation   | 12    | 42.8571429 | 5.16E-04   | Q9CYR6, Q9CW03, Q9DCN2, Q99020, Q9    | 28         | 3125     | 22680     | 3.1104       | 0.05519451 | 0.01409379 | 0.581459   |
| UP_KEYWOR | Cytoplasm     | 14    | 50         | 7.04E-04   | Q9DCN2, Q99020, P21126, P56371, P051  | 28         | 4404     | 22680     | 2.57493188   | 0.07452646 | 0.0153706  | 0.79234111 |
| GOTERM_CC | GO:0005739    | 9     | 32.1428571 | 0.00165395 | P05132, Q9DCN2, Q8BGH2, O89023, Q91   | 28         | 1721     | 19662     | 3.67224205   | 0.14551396 | 0.14551396 | 1.80307883 |
| GOTERM_CC | GO:0070062    | 11    | 39.2857143 | 0.0019703  | P05132, Q9DCN2, Q8BGH2, O89023, P24   | 28         | 2674     | 19662     | 2.88869003   | 0.1708572  | 0.08942722 | 2.1445667  |
| UP_KEYWOR | Lipoprotein   | 6     | 21.4285714 | 0.00204304 | P05132, Q9DCN2, Q91ZR1, P21278, S4R2  | 28         | 780      | 22680     | 6.23076923   | 0.20145504 | 0.0367998  | 2.28414508 |
| GOTERM_M  | GO:0003924    | 4     | 14.2857143 | 0.00401014 | P21278, P30677, D3Y268, P56371        | 28         | 209      | 17446     | 11.924812    | 0.32820502 | 0.12418526 | 4.35387531 |
| INTERPRO  | IPRO00654:G   | 2     | 7.14285714 | 0.00523432 | P21278, P30677                        | 28         | 4        | 20594     | 367.75       | 0.36655495 | 0.20410739 | 5.51404488 |
| GOTERM_CC | GO:0005737    | 17    | 60.7142857 | 0.00570778 | Q9CW03, Q9DCN2, Q99020, P21126, P56   | 28         | 6631     | 19662     | 1.80027792   | 0.41945738 | 0.16578492 | 6.09812944 |
| UP_SEQ_FE | short sequen  | 3     | 10.7142857 | 0.00842407 | Q91ZR1, S4R232, P35283, P56371        | 26         | 100      | 18012     | 20.7830769   | 0.54468102 | 0.32522672 | 8.84538121 |
| GOTERM_CC | GO:0005829    | 8     | 28.5714286 | 0.00876123 | Q9CYR6, P05132, P21126, P21278, Q922I | 28         | 1784     | 19662     | 3.14894299   | 0.56655248 | 0.18860163 | 9.21973172 |
| UP_SEQ_FE | lipid moiety  | 3     | 10.7142857 | 0.01011654 | Q91ZR1, S4R232, P35283, P56371        | 26         | 110      | 18012     | 18.8937063   | 0.61156522 | 0.27036437 | 10.5342867 |
| GOTERM_CC | GO:0032593    | 2     | 7.14285714 | 0.01229368 | Q91ZR1, S4R232, P56371                | 28         | 9        | 19662     | 156.047619   | 0.69122372 | 0.20945101 | 12.7131425 |
| GOTERM_M  | GO:0005515    | 13    | 46.4285714 | 0.01304464 | Q9DCN2, Q9CW03, Q99020, O89023, A0    | 28         | 4092     | 17446     | 1.97945469   | 0.72744554 | 0.27745762 | 13.5378819 |
| INTERPRO  | IPRO01806:S   | 3     | 10.7142857 | 0.01326132 | Q91ZR1, S4R232, P35283, P56371        | 28         | 134      | 20594     | 16.4664179   | 0.68696909 | 0.32101152 | 13.4356186 |
| UP_SEQ_FE | domain:RRM    | 3     | 10.7142857 | 0.01350891 | Q99020, Q921F4, P52912                | 26         | 128      | 18012     | 16.2367788   | 0.71773016 | 0.27110307 | 13.8341783 |
| UP_SEQ_FE | domain:RRM    | 3     | 10.7142857 | 0.01350891 | Q99020, Q921F4, P52912                | 26         | 128      | 18012     | 16.2367788   | 0.71773016 | 0.27110307 | 13.8341783 |
| GOTERM_BF | GO:0060158    | 2     | 7.14285714 | 0.0137436  | P21278, P30677                        | 26         | 10       | 18082     | 139.092308   | 0.90618729 | 0.90618729 | 15.5490801 |
| GOTERM_CC | GO:0048471    | 5     | 17.8571429 | 0.01401921 | P05132, Q9WTX2, Q91ZR1, P24369, S4R2  | 28         | 692      | 19662     | 5.07380264   | 0.73848116 | 0.20031829 | 14.3747733 |
| UP_KEYWOR | Prenylation   | 3     | 10.7142857 | 0.0149212  | Q91ZR1, S4R232, P35283, P56371        | 28         | 157      | 22680     | 15.477707    | 0.80865936 | 0.21041111 | 15.6211807 |
| KEGG_PATH | mmu05146:z    | 3     | 10.7142857 | 0.01853061 | P05132, P21278, P30677                | 15         | 117      | 7691      | 13.1470085   | 0.74945815 | 0.74945815 | 17.7801684 |
| INTERPRO  | IPRO05225:S   | 3     | 10.7142857 | 0.01964105 | Q91ZR1, S4R232, P35283, P56371        | 28         | 165      | 20594     | 13.3727273   | 0.82196502 | 0.35042944 | 19.296218  |
| SMART     | SM00275:SV    | 2     | 7.14285714 | 0.01978062 | P21278, P30677                        | 14         | 16       | 10425     | 93.0803571   | 0.258947   | 0.258947   | 12.9689304 |
| COG_ONTO  | Coenzyme m    | 2     | 7.14285714 | 0.02055046 | Q8BHC4, Q922D8                        | 5          | 11       | 2126      | 77.3090909   | 0.07970247 | 0.07970247 | 7.62193054 |
| INTERPRO  | IPRO01019:G   | 2     | 7.14285714 | 0.02077947 | P21278, P30677                        | 28         | 16       | 20594     | 91.9375      | 0.83908207 | 0.30606165 | 20.3033091 |
| INTERPRO  | IPRO11025:G   | 2     | 7.14285714 | 0.02077947 | P21278, P30677                        | 28         | 16       | 20594     | 91.9375      | 0.83908207 | 0.30606165 | 20.3033091 |
| UP_KEYWOR | Magnesium     | 4     | 14.2857143 | 0.02341931 | Q9CYR6, P21278, P30677, Q9CPY7        | 28         | 521      | 22680     | 6.21880998   | 0.92622747 | 0.27808373 | 23.4896967 |
| UP_KEYWOR | Methylation   | 5     | 17.8571429 | 0.02577614 | Q8BGH2, Q99020, Q91ZR1, S4R232, D3Y   | 28         | 960      | 22680     | 4.21875      | 0.94344595 | 0.27325031 | 25.5501458 |
| GOTERM_M  | GO:0044822    | 6     | 21.4285714 | 0.02612478 | Q9WTX2, Q99020, P24369, Q921F4, P52E  | 28         | 1113     | 17446     | 3.35887563   | 0.9272508  | 0.4079401  | 25.4176864 |
| GOTERM_CC | GO:0016020    | 16    | 57.1428571 | 0.02671011 | Q9DCN2, P21126, Q91ZR1, Q921F4, Q8B   | 28         | 6998     | 19662     | 1.60551994   | 0.92361463 | 0.30748366 | 25.7395063 |
| GOTERM_M  | GO:0019001    | 2     | 7.14285714 | 0.02750716 | P21278, P30677                        | 28         | 18       | 17446     | 69.2301587   | 0.93679453 | 0.3688599  | 26.5821652 |
| SMART     | SM00360:RR    | 3     | 10.7142857 | 0.03195314 | Q99020, Q921F4, P52912                | 14         | 229      | 10425     | 9.7551466    | 0.3856078  | 0.21616826 | 20.2109578 |
| UP_KEYWOR | RNA-binding   | 4     | 14.2857143 | 0.03378888 | Q9WTX2, Q99020, Q921F4, P52912        | 28         | 601      | 22680     | 5.39101498   | 0.9772006  | 0.31483947 | 32.1827649 |
| GOTERM_M  | GO:0031683    | 2     | 7.14285714 | 0.03800639 | P21278, P30677                        | 28         | 25       | 17446     | 49.8457143   | 0.97842024 | 0.42189507 | 34.900773  |
| GOTERM_BF | GO:0030100    | 2     | 7.14285714 | 0.03802642 | Q91ZR1, S4R232, P56371                | 26         | 28       | 18082     | 49.6758242   | 0.99867902 | 0.96365464 | 37.7140911 |
| INTERPRO  | IPRO00504:R   | 3     | 10.7142857 | 0.03950976 | Q99020, Q921F4, P52912                | 28         | 241      | 20594     | 9.15560166   | 0.97001615 | 0.44262447 | 35.3168661 |
| KEGG_PATH | mmu04020:c    | 3     | 10.7142857 | 0.04121417 | P05132, P21278, P30677                | 15         | 1807     | 7691      | 8.54555556   | 0.95559836 | 0.78928302 | 35.6296644 |
| GOTERM_BF | GO:0007264    | 3     | 10.7142857 | 0.04179136 | Q91ZR1, S4R232, P35283, P56371        | 26         | 236      | 18082     | 8.84061278   | 0.99932442 | 0.91225453 | 40.6265678 |
| UP_SEQ_FE | nucleotide.pl | 5     | 17.8571429 | 0.04192923 | P05132, Q9CW03, Q99PU5, Q8BHC4, Q9    | 26         | 963      | 18012     | 3.59693266   | 0.98138017 | 0.54918834 | 37.4322709 |
| GOTERM_CC | GO:0005834    | 2     | 7.14285714 | 0.05092453 | P21278, P30677                        | 28         | 38       | 19662     | 36.9586466   | 0.99302457 | 0.46241596 | 43.7025512 |
| INTERPRO  | IPRO12677:N   | 3     | 10.7142857 | 0.0520625  | Q99020, Q921F4, P52912                | 28         | 281      | 20594     | 7.85231317   | 0.99045372 | 0.48547687 | 43.8894472 |
| UP_SEQ_FE | domain:RRM    | 2     | 7.14285714 | 0.06717819 | Q921F4, P52912                        | 26         | 50       | 18012     | 27.7107692   | 0.99844662 | 0.65968609 | 53.2941109 |
| GOTERM_CC | GO:0030529    | 3     | 10.7142857 | 0.07099296 | Q99020, Q921F4, P52912                | 28         | 320      | 19662     | 6.58325893   | 0.99908419 | 0.54035468 | 55.4894065 |
| UP_KEYWOR | ATP-binding   | 5     | 17.8571429 | 0.07575569 | P05132, Q9CW03, Q99PU5, Q8BHC4, Q9    | 28         | 1363     | 22680     | 2.97138665   | 0.9998276  | 0.54515037 | 58.9370112 |
| KEGG_PATH | mmu00330:z    | 2     | 7.14285714 | 0.08566337 | Q8CHT0, Q9CPY7                        | 15         | 49       | 7691      | 20.9278912   | 0.99867611 | 0.89019613 | 60.8339399 |
| KEGG_PATH | mmu00520:z    | 2     | 7.14285714 | 0.08566337 | Q9CYR6, Q9DCN2                        | 15         | 49       | 7691      | 20.9278912   | 0.99867611 | 0.89019613 | 60.8339399 |
| GOTERM_M  | GO:0019003    | 2     | 7.14285714 | 0.08888623 | P35283, P56371                        | 28         | 60       | 17446     | 20.7690476   | 0.99990053 | 0.68398258 | 64.3440741 |
| UP_SEQ_FE | mutagenesis   | 4     | 14.2857143 | 0.08970462 | P05132, Q9CW03, Q921F4, Q99PU5        | 26         | 772      | 18012     | 3.58947788   | 0.99984006 | 0.71311474 | 64.2604308 |
| GOTERM_M  | GO:0001664    | 2     | 7.14285714 | 0.09453329 | P21278, P30677                        | 28         | 64       | 17446     | 19.4709821   | 0.99994625 | 0.66457351 | 66.7172763 |
