# Supplementary material for: Reduction of Fmr1 mRNA Levels Rescues Pathological Features in Cortical Neurons in a Model of FXTAS
Source: PubMed Central journal article supplement — Mol Ther Nucleic Acids. 2019 Sep 26;18:546–53. doi: 10.1016/j.omtn.2019.09.018 (PMC6838541; doi:10.1016/j.omtn.2019.09.018), 2019-09-26
Supplement: mmc2.pdf [file mmc2.pdf]

# Reduction of *Fmr1* mRNA Levels Rescues Pathological Features in Cortical Neurons in a Model of FXTAS

Malgorzata Drozd,<sup>1,4</sup> Sébastien Delhaye,<sup>1,4</sup> Thomas Maurin,<sup>1,4</sup> Sara Castagnola,<sup>1</sup> Mauro Grossi,<sup>1</sup> Frédéric Brau,<sup>1</sup> Marielle Jarjat,<sup>1</sup> Rob Willemsen,<sup>2</sup> Maria Capovilla,<sup>1</sup> Renate K. Hukema,<sup>2</sup> Enzo Lalli,<sup>3</sup> and Barbara Bardoni<sup>3</sup>

<sup>1</sup>Université Côte d'Azur, CNRS, Institute of Molecular and Cellular Pharmacology, 06560 Valbonne Sophia Antipolis, France; <sup>2</sup>Department of Clinical Genetics, Erasmus Medical Center, Rotterdam, the Netherlands; <sup>3</sup>Université Côte d'Azur, INSERM, CNRS, Institute of Molecular and Cellular Pharmacology, 06560 Valbonne Sophia Antipolis, France

**Fragile X-associated tremor ataxia syndrome (FXTAS) is a rare disorder associated to the presence of the fragile X premutation, a 55–200 CGG repeat expansion in the 5' UTR of the *FMRI* gene. Two main neurological phenotypes have been described in carriers of the CGG premutation: (1) neurodevelopmental disorders characterized by anxiety, attention deficit hyperactivity disorder (ADHD), social deficits, or autism spectrum disorder (ASD); and (2) after 50 years old, the FXTAS phenotype. This neurodegenerative disorder is characterized by ataxia and a form of parkinsonism. The molecular pathology of this disorder is characterized by the presence of elevated levels of *Fragile X Mental Retardation 1 (FMRI)* mRNA, presence of a repeat-associated non-AUG (RAN) translated peptide, and *FMRI* mRNA-containing nuclear inclusions. Whereas in the past FXTAS was mainly considered as a late-onset disorder, some phenotypes of patients and altered learning and memory behavior of a mouse model of FXTAS suggested that this disorder involves neurodevelopment. To better understand the physiopathological role of the increased levels of *Fmr1* mRNA during neuronal differentiation, we used a small interfering RNA (siRNA) approach to reduce the abundance of this mRNA in cultured cortical neurons from the FXTAS mouse model. Morphological alterations of neurons were rescued by this approach. This cellular phenotype is associated to differentially expressed proteins that we identified by mass spectrometry analysis. Interestingly, phenotype rescue is also associated to the rescue of the abundance of 29 proteins that are involved in various pathways, which represent putative targets for early therapeutic approaches.**

## INTRODUCTION

The *Fragile X Mental Retardation 1 (FMRI)* gene encodes the fragile X mental retardation protein (FMRP), an RNA binding protein whose functional absence causes fragile X syndrome (FXS), the most common form of intellectual disability (ID) and autism spectrum disorder (ASD). The mutation in the *FMRI* gene causing FXS is the presence of a repeated sequence encompassing >200 CGG repeats in its 5' UTR. Hypermethylation of this sequence determines

gene promoter inactivation, causing the silencing of the *FMRI* gene.<sup>1</sup> Although 6–54 CGG repeats in the 5' UTR of *FMRI* is a polymorphism in normal individuals, a repeat sequence of variable length (55–200 CGG repeats) represents the premutation<sup>1</sup> that can cause fragile X tremor ataxia syndrome (FXTAS) in patients over 50 years of age.<sup>2,3</sup> This is an adult-onset progressive neurodegenerative disorder leading to a variable combination of ataxia, essential tremor, gait imbalance, parkinsonism, peripheral neuropathy, anxiety, and cognitive decline, occurring predominantly in older men carrying the premutation. It is known that people carrying the premutation have a reduced hippocampal volume that correlates with impaired performance in standardized tests of memory.<sup>3</sup> At the cellular level, this disorder is characterized by the presence of eosinophilic, ubiquitin-positive nuclear inclusions, which have been observed throughout the brain, with a high percentage being located in the hippocampus of patients, as well as in the animal model of the disease.<sup>3,4</sup> Inclusions are negative for tau isoforms, alpha-synuclein, or polyglutamine peptides, reflecting a new class of inclusion disorder.<sup>3</sup> At the molecular level, FXTAS is characterized by an elevated (2- to 8-fold) level of *FMRI* mRNA, whereas the level of FMRP is normal or slightly reduced in patients, as well in the CGG-KI mouse model.<sup>2–4</sup> The *FMRI* mRNA is a component of nuclear inclusions<sup>3</sup>. The product of repeat-associated non-ATG (RAN) translation of the *FMRI* mRNA was also reported to be involved in the generation of inclusions when overexpressed.<sup>5,6</sup> Although FXTAS is a late-onset disorder, it is also characterized by a set of developmental hallmarks, such as self-reported memory problems, autism-related traits, attention deficit hyperactivity disorder (ADHD), executive functioning, and psychopathology.<sup>7</sup> Knockin (KI) mouse models have been generated displaying both neurodegenerative and neurodevelopmental

Received 18 July 2019; accepted 8 September 2019;  
<https://doi.org/10.1016/j.omtn.2019.09.018>.

<sup>4</sup>These authors contributed equally to this work.

**Correspondence:** Barbara Bardoni, Université Côte d'Azur, INSERM, CNRS, Institute of Molecular and Cellular Pharmacology, 06560 Valbonne Sophia Antipolis, France.

**E-mail:** [bardoni@ipmc.cnrs.fr](mailto:bardoni@ipmc.cnrs.fr)





**Figure 1. Role of *Fmr1* mRNA Levels in Dendritic Arborization**

(A) RNA was prepared from cultured WT and knockin-CGG (KI-CGG) neurons transduced with the control (C) shRNA or two different shRNAs directed against *Fmr1* mRNA (1a and 1b). The level of *Fmr1* mRNA was measured by qRT-PCR using specific primers. Ten different experiments have been carried out for each transduced lentivirus, and a reduction of *Fmr1* levels was observed by using both shRNAs. Results are presented as mean  $\pm$  SEM; one-way ANOVA with Tukey's multiple comparisons test, \*\* $p < 0.01$ . (B) Representative western blot analysis of cell cultures of cortical neurons transduced with C, 1a, or 1b shRNAs. FMRP (70 kDa) and  $\beta$ -tubulin (50 kDa) were revealed with specific antibodies. (C) Image of WT and KI-CGG cortical neurons transduced with lentiviruses expressing C, 1a, or 1b shRNAs. Scale bars: 20  $\mu$ m. (D) Sholl analysis of WT and KI cultured mouse cortical neurons transduced with C or 1a or 1b shRNAs. Reduced arborization of KI-CGG neurons is rescued by *Fmr1* knockdown. Two-way ANOVA was used to compare KI-C and 1a treatments: genotype F(2; 1,527) = 227.9,  $p < 0.0001$ ;

treatment (34; 1,527) = 34.12,  $p < 0.0001$ ; interaction F(68; 1,527) = 3.067,  $p < 0.0001$ ; two-way ANOVA was used to compare KI-C and 1b treatments: genotype F(2; 1,318) = 293.6, \*\*\*\* $p < 0.0001$ ; treatment F(34; 1,318) = 36.21, \*\*\*\* $p < 0.0001$ ; interaction F(68; 1,318) = 3,803,  $p < 0.0001$ .

phenotypes. It was reported that neuronal abnormalities and behavioral alterations in the animal model are present before the appearance of neuronal inclusions. Indeed, cultured hippocampal neurons obtained from a CGG-KI display shorter dendritic length and reduced dendritic complexity.<sup>4,8-10</sup> In CGG-KI mice, cortical migration is also affected. Indeed, at embryonic day (E) 17, a 2-fold higher percentage of migrating neurons was detected to be oriented toward the ventricle in wild-type (WT) compared with CGG-KI mice.<sup>11</sup> All of these abnormalities were observed in inclusion-free cells, because CGG-KI mice display ubiquitin-positive intranuclear inclusions in neurons and astrocytes of the hippocampus and cerebellar internal cell layer starting at 12 weeks of age.<sup>4,8,9,11</sup> Here we investigated the impact of normalization of *Fmr1* mRNA levels on the morphology and proteomics of cortical cultured neurons obtained from a FXTAS mouse model (CGG-KI)<sup>8,9</sup> before the generation of nuclear inclusions. By this analysis we have obtained a deeper insight into the physiopathological role of *Fmr1* mRNA levels in FXTAS and identified putative targetable pathways for early treatments.

## RESULTS

Hippocampal neurons were isolated from knockin-CGG (KI-CGG) E15.5 mice harboring the CGG premutated allele. It has been shown that these mice display abnormal cortical neuron migration patterns *in utero*.<sup>10,11</sup> Furthermore, abnormal dendritic architecture and reduced cellular viability have been observed in hippocampal primary neurons of KI-CGG mice, where increased expression of *Fmr1* is already present even if nuclear inclusions are not detected.<sup>10</sup> Indeed, nuclear inclusions appear first in the hippocampus of these mice at the age of 3 months, whereas the same hallmark appears later in the parietal neocortex.<sup>8,9</sup> We decided to explore whether cultured cortical neurons obtained from these mice have an abnormal

morphology of dendrites and axons during development before the appearance of nuclear inclusions. We studied the dendritic arborization of wild-type (WT) and KI-CGG cortical neurons by Sholl analysis, as previously described,<sup>12</sup> and observed that KI-CGG neurons have a reduced arborization compared with controls (Figures S1A and S1B). To assess whether *Fmr1* mRNA levels impact the morphology of these cultured neurons, we produced lentiviruses expressing two different shRNAs selectively reducing the expression of *Fmr1* mRNA (sh-1a and sh-1b) and one shRNA control (sh-C),<sup>13</sup> and we used them to transduce cortical cultured neurons obtained from WT and from KI-CGG mice. The infection was performed at 5 DIV (days *in vitro*), and RNA and proteins were prepared from these cultures at 20 DIV. As expected,<sup>4,13</sup> *Fmr1* mRNA levels were elevated 2-fold in cultured KI cortical neurons compared with WT. sh-1a reduced *Fmr1* transcript levels by 30%, whereas sh-1b reduced them by 50%, (Figure 1A). FMRP levels are not changed in KI cultured neurons compared with WT,<sup>10,13</sup> and as previously shown in patients.<sup>2,3</sup> Similarly, the expression level of FMRP was not affected by *Fmr1* knockdown in KI neurons (Figure 1B), as we already observed by transfecting fibroblasts obtained from FXTAS patients with the same shRNAs.<sup>13</sup> We then analyzed the arborization of WT and KI cortical neurons transduced with *Fmr1* shRNAs. We confirmed that KI neurons transduced with the lentivirus expressing the control shRNA (KI-C) are less arborized than WT neurons transduced with the same lentivirus (Figures 1C and 1D). However, KI neurons transduced with lentivirus expressing either sh-1a or sh-1b displayed a normal dendritic arborization (Figures 1C and 1D).

In 2 DIV neurons we measured the axon length, and we found that they are significantly shorter in *Fmr1*-KI neurons compared with



**Figure 2. *Fmr1* mRNA Levels Are Associated to Axon Growth**

(A) Representative pictures of 2 days *in vitro* cultured WT-C, KI-C, KI-1a, and KI-1b primary cortical neurons. Scale bars: 10 μm. (B) Histogram of axon length of WT and KI cultured neurons transfected with C, 1a, or 1b shRNAs. Results show mean axon length ± SEM of 150 randomly selected cells for each condition from three independent cultures. One-way ANOVA with Tukey's multiple comparisons test, \* $p < 0.05$ .

WT (Figure S2). We confirmed that KI-C neurons have shorter axons than WT-C, but the length of these axons was normalized in KI-1a and KI-1b neurons (Figures 2A and 2B).

We then focused on dendritic spine abnormalities. The absence of FMRP causes a peculiar morphology of dendritic spines that has been described in FXS patients and in the mouse model, where it is particularly evident in young animals.<sup>14,15</sup> Conversely, the study of dendritic spines in the brain of FXTAS patients was never reported, and in *Fmr1* KI mice it was studied only in hippocampi and in the visual cortex from adult animals, displaying an increased length of spines.<sup>4,16</sup> Here we studied the morphology of dendritic spines of 20 DIV cultured cortical neurons. KI-C spines are longer, denser, and larger than controls. All of these hallmarks are rescued in KI-1a and KI-1b neurons (Figures 3A–3D), indicating that the elevated level of *Fmr1* mRNA causes a set of morphological alterations in KI-CGG neurons. However, the percentage of the different types of spines (thin, stubby, and mushroom) is not significantly different in the two genotypes (Figures 3E–3G).

To get deeper insight into the molecular pathology of FXTAS cultured neurons, we performed a proteomic analysis of neurons that have been transduced with control shRNA or with the shRNAs targeting the *Fmr1* mRNA. Protein extracts of three replicates for each condition were analyzed by nano-liquid chromatography-tandem mass spectrometry (nano-LC-MS/MS) after tryptic digestion.<sup>17</sup> A total of 487 proteins were identified (Table S1), among which 251 have a ratio >2 (upregulation) or <0.5 (downregulation) for at least one of the three comparisons (WT-C versus KI-C, WT-C versus KI-1a, and WT-C versus KI-1b) with a  $p$  value <0.10. Interestingly, the abundance of 29 differentially expressed proteins is rescued after reduction of *Fmr1* mRNA by using both specific shRNAs (Table 1). Gene Ontology analysis of these proteins reveals a significant enrichment of proteins involved in different biochemical pathways, among which are GTP binding and RNA binding proteins (Figure 4; Table S2).

## DISCUSSION

Two main neurological phenotypes have been described in carriers of the CGG premutation: those exhibiting neurodevelopmental disorders characterized by anxiety, ADHD, social deficits, or ASD, and after 50 years old, FXTAS, a neurodegenerative disorder.<sup>3</sup> For some time, nuclear inclusions have been considered as the cause of neurodegeneration, whereas more recent studies suggest that nuclear inclusions may represent a mechanism used by neurons to protect themselves from toxic events.<sup>4,18–20</sup> So far, two other main physiopathological elements are known to underpin the FXTAS phenotype: the elevated abundance of *FMR1* mRNA<sup>2</sup> and the presence of a RAN polypeptide.<sup>5,6</sup> We considered that it is crucial to unravel the role of each element in the molecular pathology of FXTAS to understand the progression of the disorder and its role in pathophysiology. Indeed, it is interesting to remind that neuronal abnormal dendritic morphology (e.g., reduced length and number of dendrites that display longer spines) has been observed in FXTAS neurons at a time of development when nuclear inclusions are not detectable.<sup>3,4,8–11</sup> These findings suggest that some developmental abnormalities may contribute to the late manifestation of neurodegenerative process and/or that the disease appears, with subtle phenotypes, earlier than predicted up to date. So far, no specific treatment is available for FXTAS patients. A therapy based on allopregnanolone was shown to improve cognitive functioning in patients with FXTAS and to partially alleviate some aspects of neurodegeneration,<sup>21</sup> opening the possibility to search for new targetable pathways in young patients. In this study, we used a murine model of FXTAS to investigate the impact that the reduced level of *Fmr1* mRNA, but not of its encoded protein, has on the morphological and molecular phenotypes of FXTAS cultured neurons. Certainly, by reducing *Fmr1* mRNA levels, we are also supposed to reduce RAN levels, which is possibly involved in the pathophysiology of FXTAS.<sup>6</sup> However, that peptide was never detected at endogenous levels in neurons so far.<sup>3,22</sup>

First, we defined phenotypes that were never considered before in cultured cortical neurons obtained from the FXTAS mouse



**Figure 3. Reduction of *Fmr1* mRNA Levels Normalizes Dendritic Spine Morphology in KI Cortical Neurons**

(A) Representative high-resolution confocal images showing dendritic spine morphology were assessed using NeuronStudio software and compared with the measurement obtained from control transduced neurons. Scale bars: 2  $\mu\text{m}$ . All histograms present mean  $\pm$  SEM values. Statistical significance was assessed by one-way ANOVA with Tukey's multiple comparisons test. (B–G) Histograms showing the mean  $\pm$  SEM values of (B) protrusion frequency in the various cultures, \* $p < 0.05$ ; (C) spine length, \*\*\* $p < 0.001$ ; (D) spine head size, \*\*\* $p < 0.001$ ; (E) percentage of thin spines; (F) percentage of stubby spines; and (G) percentage of mushroom spines.

model: axon length and dendrite morphology. All of these new phenotypes are detected in cells not yet displaying nuclear inclusions, which are known to first appear in hippocampal neurons of 12-week-old KI-CGG mice.<sup>9</sup> Interestingly, these animals have mild learning and memory deficits,<sup>4,9</sup> and this behavioral phenotype is consistent with the phenotype that we observed in cultured cortical neurons. Importantly, we confirm that these phenotypes are associated with the levels of *Fmr1* mRNA because they are rescued after the expression of shRNAs specifically targeting this mRNA. We can deduce that an elevated abundance of *Fmr1* mRNA may interfere with normal RNA metabolism. We can predict that the overexpression of *Fmr1* mRNA may also likely interfere with the normal activity of RNA binding proteins or microRNAs (miRNAs) in neuronal soma, and at the synapse by competing for their binding at specific sites or at miRNA response elements (MREs).<sup>13</sup> All of these considerations suggest that *Fmr1* mRNA metabolism can be regulated by a large number of RNA binding proteins and can be co-regulated with a plethora of other RNAs. For this reason, as the second step of our study, we performed a differential proteomic analysis of neurons expressing control or *Fmr1*-specific shRNAs, and we observed that a set of proteins, whose expression is deregulated in KI-CGG neurons, is normalized after treatment. Consistently, several proteins rescued by *Fmr1*-specific shRNAs are RNA binding proteins (e.g., Tial1,

Hnrnp11, and ROAA). In addition, some proteins whose levels were rescued by the reduction of *Fmr1* mRNA abundance are involved in the regulation of actin cytoskeleton dynamics, which is known to modulate the morphology of neurons and, in particular, of dendritic spines. Defective synaptic actin regulation seems to be involved in different neurodevelopmental and psychiatric disorders.<sup>23</sup> Interestingly, we have shown here that in KI-CGG neurons, dendritic spines are more numerous, and they appear overall longer and with a larger head, but the percentage of the various types of spines is unchanged. These results are consistent with a previous study displaying longer, but not immature, spines in the CGG-KI visual cortex.<sup>16</sup> In addition, our findings suggest that, at least at 20 DIV, the elevated levels of *Fmr1* mRNA do not interfere with the spine maturation process but cause subtle abnormalities of their features, which may have an impact on synaptic transmission. Other rescued proteins belong to the Rab-GTPase family, a sub-class of the RAS superfamily, which spatially and temporally orchestrates specific vesicular trafficking that is critical for synaptic function in neurons in brain developmental disorders,<sup>24</sup> as well as in Parkinson's disease.<sup>25</sup> Along the same direction, another interesting protein is CLIP2, a cytoplasmic linker factor that is considered as a mediator between organelles and the cytoskeleton.<sup>26</sup> Consistent with their role in neurons, mutants of this class of proteins are associated with impaired cognitive

**Table 1. Proteins Differentially Expressed in the Different Samples Studied**

| Name                               | UniProt Accession Number | WT-C  | KI-C  | WT-C/<br>Ki-C | Log (Fold<br>Change) | p Value | KI-1a | WT-C/<br>Ki-1a | Log (Fold<br>Change) | p Value | KI-1b | WT-C/<br>KI-1b | Log (Fold<br>Change) | p Value |
|------------------------------------|--------------------------|-------|-------|---------------|----------------------|---------|-------|----------------|----------------------|---------|-------|----------------|----------------------|---------|
| sp O89023 TPP1_MOUSE               | O89023                   | 0.00  | 0.93  | 0.00          | NA                   | 0.00001 | 0.00  | NA             | NA                   | 1.00000 | 0.00  | NA             | NA                   | 1.00000 |
| sp P05132 KAPCA_MOUSE              | P05132                   | 5.16  | 10.17 | 0.51          | -0.29                | 0.00132 | 5.83  | 0.89           | -0.05                | 0.81905 | 4.79  | 1.08           | 0.03                 | 0.81905 |
| sp P21126 UBL4A_MOUSE              | P21126                   | 0.33  | 1.53  | 0.21          | -0.67                | 0.04762 | 0.66  | 0.49           | -0.31                | 0.51266 | 0.38  | 0.85           | -0.07                | 0.51266 |
| sp P21278 GNA11_MOUSE              | P21278                   | 7.43  | 4.06  | 1.83          | 0.26                 | 0.03470 | 6.49  | 1.14           | 0.06                 | 0.69780 | 7.98  | 0.93           | -0.03                | 0.69780 |
| sp P24369 PPIB_MOUSE               | P24369                   | 8.43  | 12.31 | 0.68          | -0.16                | 0.03540 | 6.73  | 1.25           | 0.10                 | 0.68137 | 9.91  | 0.85           | -0.07                | 0.68137 |
| sp P30677 GNA14_MOUSE              | P30677                   | 2.57  | 0.93  | 2.77          | 0.44                 | 0.04928 | 2.40  | 1.07           | 0.03                 | 0.88974 | 3.24  | 0.79           | -0.10                | 0.88974 |
| sp P35283 RAB12_MOUSE              | P35283                   | 5.82  | 3.08  | 1.89          | 0.28                 | 0.00979 | 5.87  | 0.99           | 0.00                 | 0.95886 | 5.51  | 1.06           | 0.02                 | 0.95886 |
| sp P52912 TIA1_MOUSE               | P52912                   | 0.00  | 0.93  | 0.00          | NA                   | 0.00001 | 0.00  | NA             | NA                   | 1.00000 | 0.32  | 0.00           | NA                   | 1.00000 |
| sp P56371 RAB4A_MOUSE              | P56371                   | 5.81  | 3.08  | 1.89          | 0.28                 | 0.00560 | 5.87  | 0.99           | 0.00                 | 0.94159 | 5.19  | 1.12           | 0.05                 | 0.94159 |
| sp Q80TS3 AGRL3_MOUSE              | Q80TS3                   | 0.97  | 2.16  | 0.45          | -0.35                | 0.01678 | 0.37  | 2.64           | 0.42                 | 0.17665 | 0.38  | 2.53           | 0.40                 | 0.17665 |
| sp Q8BGH2 SAM50_MOUSE              | Q8BGH2                   | 2.28  | 0.29  | 7.74          | 0.89                 | 0.01329 | 2.07  | 1.10           | 0.04                 | 0.79778 | 2.13  | 1.07           | 0.03                 | 0.79778 |
| sp Q8BHC4 DCAKD_MOUSE              | Q8BHC4                   | 0.00  | 0.93  | 0.00          | NA                   | 0.00001 | 0.31  | 0.00           | NA                   | 0.37390 | 0.00  | NA             | NA                   | 0.37390 |
| sp Q8CHT0 AL4A1_MOUSE              | Q8CHT0                   | 2.94  | 0.63  | 4.64          | 0.67                 | 0.02926 | 2.43  | 1.21           | 0.08                 | 0.54007 | 1.95  | 1.51           | 0.18                 | 0.54007 |
| sp Q91ZR1 RAB4B_MOUSE              | Q91ZR1                   | 5.82  | 3.68  | 1.58          | 0.20                 | 0.02923 | 5.51  | 1.05           | 0.02                 | 0.71442 | 5.19  | 1.12           | 0.05                 | 0.71442 |
| sp Q921F4 HNRL1_MOUSE              | Q921F4                   | 0.97  | 0.00  | ∞             | NA                   | 0.00000 | 0.98  | 0.99           | 0.00                 | 0.98875 | 0.78  | 1.24           | 0.09                 | 0.98875 |
| sp Q922D8 C1TC_MOUSE               | Q922D8                   | 1.28  | 2.78  | 0.46          | -0.34                | 0.00809 | 0.92  | 1.40           | 0.15                 | 0.72353 | 1.29  | 1.00           | 0.00                 | 0.72353 |
| sp Q99020 ROAA_MOUSE               | Q99020                   | 1.63  | 0.31  | 5.34          | 0.73                 | 0.04589 | 1.69  | 0.97           | -0.02                | 0.90543 | 2.19  | 0.74           | -0.13                | 0.90543 |
| sp Q99PU5 ACBG1_MOUSE              | Q99PU5                   | 2.92  | 1.55  | 1.88          | 0.27                 | 0.01399 | 2.73  | 1.07           | 0.03                 | 0.62466 | 2.61  | 1.12           | 0.05                 | 0.62466 |
| sp Q9CPY7 AMPL_MOUSE               | Q9CPY7                   | 1.61  | 3.38  | 0.48          | -0.32                | 0.00921 | 2.00  | 0.81           | -0.09                | 0.53465 | 1.43  | 1.13           | 0.05                 | 0.53465 |
| sp Q9CW03 SMC3_MOUSE               | Q9CW03                   | 0.33  | 1.53  | 0.21          | -0.67                | 0.04762 | 0.71  | 0.46           | -0.34                | 0.64890 | 0.38  | 0.85           | -0.07                | 0.64890 |
| sp Q9CYR6 AGM1_MOUSE               | Q9CYR6                   | 0.33  | 1.86  | 0.18          | -0.75                | 0.01091 | 0.00  | ∞              | ∞                    | 0.37390 | 0.32  | 1.04           | 0.02                 | 0.37390 |
| sp Q9DCN2 NB5R3_MOUSE              | Q9DCN2                   | 4.53  | 6.79  | 0.67          | -0.18                | 0.00385 | 4.79  | 0.95           | -0.02                | 0.62926 | 4.48  | 1.01           | 0.00                 | 0.62926 |
| sp Q9WTX2 PRKRA_MOUSE              | Q9WTX2                   | 0.33  | 1.53  | 0.21          | -0.67                | 0.04762 | 0.00  | ∞              | ∞                    | 0.37390 | 0.00  | ∞              | ∞                    | 0.37390 |
| sp Q9Z0H8 CLIP2_MOUSE              | Q9Z0H8                   | 4.51  | 8.09  | 0.56          | -0.25                | 0.04003 | 4.68  | 0.96           | -0.02                | 0.88427 | 5.62  | 0.80           | -0.10                | 0.88427 |
| tr A0A087WPM2 <br>A0A087WPM2_MOUSE | A0A087WPM2               | 1.94  | 2.78  | 0.70          | -0.16                | 0.00099 | 1.64  | 1.18           | 0.07                 | 0.61624 | 1.12  | 1.73           | 0.24                 | 0.61624 |
| tr A0AUM9 A0AUM9_MOUSE             | A0AUM9                   | 0.00  | 0.93  | 0.00          | NA                   | 0.00001 | 0.00  | NA             | NA                   | 1.00000 | 0.00  | NA             | NA                   | 1.00000 |
| tr D3YZ68 D3YZ68_MOUSE             | D3YZ68                   | 39.80 | 47.10 | 0.84          | -0.07                | 0.03447 | 38.80 | 1.03           | 0.01                 | 0.89853 | 36.50 | 1.09           | 0.04                 | 0.89853 |
| tr E9Q7C9 E9Q7C9_MOUSE             | E9Q7C9                   | 7.46  | 9.91  | 0.75          | -0.12                | 0.03009 | 5.75  | 1.30           | 0.11                 | 0.10120 | 7.97  | 0.94           | -0.03                | 0.10120 |
| tr S4R232 S4R232_MOUSE             | S4R232                   | 5.50  | 3.04  | 1.81          | 0.26                 | 0.03279 | 5.50  | 1.00           | 0.00                 | 0.99389 | 5.17  | 1.06           | 0.03                 | 0.99389 |

NA, not applicable.



**Figure 4. Gene Ontology Classification of Rescued Proteins in KI-CGG Neurons**

(A and B) The DAVID Gene Ontology Functional Annotation Clustering tool<sup>40</sup> was used to show functional classification of rescued proteins in KI-CGG neurons involved in (A) nucleotide-GTP binding and (B) RNA binding.

functions.<sup>21,24,27</sup> Importantly, we also found mitochondrial proteins (e.g., pyrroline-5-carboxylate dehydrogenase [Aldh4a1/P5CDH] and Samm50) that are deregulated in CGG-KI neurons, confirming the importance of mitochondria in the pathophysiology of FXTAS, as previously reported by independent studies.<sup>28,29</sup> This result suggests that an altered mitochondrial function is probably involved in early phenotypes of this disorder. Remarkably, the levels of those proteins were normalized by the reduction of *Fmr1* mRNA abundance. Thus, our data show molecular alterations that may contribute to explain the neurodevelopmental phenotypes of the mouse model and patients carrying the CGG premutation, thus providing an indication for future early therapies to treat CGG-premutation carriers. For instance, Aldh4a1/P5CDH is a mitochondrial matrix NAD(+)-dependent dehydrogenase that catalyzes the second step of the proline degradation pathway, converting pyrroline-5-carboxylate to glutamate. Altered function of this enzyme can result in a deregulation of the glutamate signaling, which is at the basis of various forms of brain disorders, as well as of Parkinson’s disease.<sup>30,31</sup> Thus, Aldh4a1/P5CDH could be a therapeutic target for FXTAS patients during different periods of life and phases of the disorder associated with the CGG premutation. Other targets may be small GTPases by

using, in this case, a strategy based on the modulation of their regulators, as recently proposed.<sup>32,33</sup> In conclusion, by our approach, we defined altered pathways in FXTAS neurons that are due to the increased levels of *Fmr1* mRNA and impact on neuronal morphology. They represent the molecular pathology underpinning the late FXTAS phenotype. In particular, differentially expressed proteins between WT and CGG-KI neurons are promising pharmacological targetable molecules for early therapeutic intervention for FXTAS. On the other side, future gene therapies could also target the CGG-repeat by excising it, as already shown in an induced pluripotent stem cell (iPSC) line.<sup>34</sup>

## MATERIALS AND METHODS

### Animals

The experiments were performed following the Animals in Research: Reporting *In Vivo* Experiments (ARRIVE) guidelines.<sup>35</sup> *Fmr1* knockin (KI) and wild-type (WT) mice on a C57BL/6J congenic background were produced as described previously.<sup>36</sup> All animals were generated and housed in groups of four in standard laboratory conditions (22°C, 55% ± 10% humidity, and 12-h light/12-h dark diurnal cycles) with food and water provided *ad libitum*. Animal care was

conducted in accordance with the European Community Directive 2010/63/EU. All experiments were approved by the local ethics committee (Comité d’Ethique en Expérimentation Animale CIEPAL-AZUR N. 00788.01).

#### Lentivirus Generation

Lentivirus particles were produced as previously described.<sup>37</sup>

#### Axon Length Measurements

Dissociated neurons were transfected with lentivirus plasmids by using Nucleofector as previously described.<sup>13</sup> Neurons were cultured for 48 h and then fixed. Axons were labeled with anti-Tuj1 antibody, and the size of individual growing axons (distance from the soma to the tip of the axon) was manually measured using the ImageJ software.<sup>15</sup>

#### Neuronal Culture and Dendritic Spine Morphology Analysis

Primary neurons were prepared from E15.5 pregnant C57BL/6 *Fmr1*<sup>CGG/ly</sup> and WT mice as previously described.<sup>12,15</sup> Neurons (5 days *in vitro*) were transduced with lentivirus as previously described.<sup>12</sup> Transduced neurons (20 days *in vitro*) were rinsed twice in PBS at room temperature (RT) after 19 h of transduction and then fixed with 4% paraformaldehyde and Triton-permeabilized. Sequential confocal images (512 × 220 pixels; zoom 3.0; average 4; speed 7) of GFP-expressing neurons were acquired with a 63× oil-immersion lens (NA 1.4) on an inverted Zeiss LSM780 confocal microscope. z series of seven to eight images of randomly selected secondary dendrites were analyzed using the NeuronStudio software, which allows for the automated detection and quantification of dendrite parameters and morphological classification, as previously performed.<sup>15</sup>

#### Protein Extraction and Western Blot Analysis

Immunoblotting was performed as follows: cells or grinded tissues were homogenized in lysis buffer, and debris was removed by centrifugation (20,000 × g, 10 min, 4°C).<sup>38</sup> Protein content in the supernatant was measured using the Bradford assay (Bio-Rad), and samples were separated on NuPAGE Bis-Tris 4%–12% gels in MOPS buffer. Separated proteins were transferred to nitrocellulose membranes (Bio-Rad). Membranes were blocked with PBS-Tween (0.05%) and milk (5%), and incubated with primary antibodies overnight.

#### Antibodies

The monoclonal 1C3 anti-FMRP antibody<sup>39</sup> was used at a 1:1,000 dilution, the anti-Tuj1 (BioLegend; TUJ1 1-15-56) antibody was used following the manufacturer’s instructions, and the monoclonal anti-β-tubulin antibody (Sigma) was used at a 1:10,000 dilution.

#### qRT-PCR

qPCR was performed on a LightCycler 480 (Roche) with MasterMix SYBRGreen (Roche) as previously described.<sup>13</sup> Primers used to amplify *Fmr1* mRNA were previously reported.<sup>37</sup>

#### Protein Identification and Analysis

Proteomic analysis was performed as previously described<sup>17</sup> and resulted in the identification of around 2,000 proteins for each condition. These proteins were then compared to highlight the proteins identified under only one condition or under several conditions (“on/off” effect) and to highlight proteins predominantly identified in one condition relative to another (up if ratio >2, down if ratio <0.5). In order to compile a short list of differentially regulated proteins, a Student’s t test was performed after normalization of the spectral count quantification data. This allowed us to obtain a p value used to make this short list: from the global alignment table of the 2,888 different proteins, we focused on proteins with a p value threshold less than 0.10.

#### Statistical Analysis

Results are expressed as mean ± SEM. All statistical analyses were based on biological replicates. Appropriate statistical tests used for each experiment are described in the corresponding figure legends. All statistical analyses were carried out using GraphPad Prism version 6.0e.

#### SUPPLEMENTAL INFORMATION

Supplemental Information can be found online at <https://doi.org/10.1016/j.omtn.2019.09.018>.

#### AUTHOR CONTRIBUTIONS

M.D., S.D., T.M., S.M., M.G., F.B., M.J., and M.C. performed the experiments; R.W. and R.K.H. provided material; T.M., E.L., and B.B. designed the experiments; M.C., E.L., R.K.H., and B.B. wrote the manuscript.

#### CONFLICTS OF INTEREST

The authors declare no competing interests.

#### ACKNOWLEDGMENTS

The authors are grateful to S. Zongaro, P. Hammann, L. Khunn, and S. Abekhouk for help. This study was supported by CNRS, INSERM, Association Française contre les Myopathies (AFM), Fondation Recherche Médicale (FRM) grant DEQ20140329490, Fondation Recherche sur le Cerveau (FRC), and Agence Nationale de la Recherche grants ANR-15-CE16-0015 and ANR-11-LABX-0028-01. M.D. and S.C. were recipients of a fellowship from the international PhD LabEx “Signalife” Program. S.D. was a recipient of a MRES fellowship.

#### REFERENCES

- Bardoni, B., Mandel, J.L., and Fisch, G.S. (2000). *FMR1* gene and fragile X syndrome. *Am. J. Med. Genet.* 97, 153–163.
- Tassone, F., Hagerman, R.J., Taylor, A.K., Gane, L.W., Godfrey, T.E., and Hagerman, P.J. (2000). Elevated levels of *FMR1* mRNA in carrier males: a new mechanism of involvement in the fragile-X syndrome. *Am. J. Hum. Genet.* 66, 6–15.
- Hagerman, P. (2013). Fragile X-associated tremor/ataxia syndrome (FXTAS): pathology and mechanisms. *Acta Neuropathol.* 126, 1–19.
- Berman, R.F., Buijssen, R.A., Usdin, K., Pintado, E., Kooy, F., Pretto, D., Pessah, I.N., Nelson, D.L., Zalewski, Z., Charlet-Bergeurand, N., et al. (2014). Mouse models of the

- fragile X premutation and fragile X-associated tremor/ataxia syndrome. *J. Neurodev. Disord.* 6, 25.
5. Kearsse, M.G., Green, K.M., Krans, A., Rodriguez, C.M., Linsalata, A.E., Goldstrohm, A.C., and Todd, P.K. (2016). CGG Repeat-Associated Non-AUG Translation utilizes a cap-dependent scanning mechanism of initiation to produce toxic proteins. *Mol. Cell* 62, 314–322.
  6. Sellier, C., Buijssen, R.A.M., He, F., Natla, S., Jung, L., Tropel, P., Gaucherot, A., Jacobs, H., Meziane, H., Vincent, A., et al. (2017). Translation of Expanded CGG Repeats into FMRpolyG Is Pathogenic and May Contribute to Fragile X Tremor Ataxia Syndrome. *Neuron* 93, 331–347.
  7. Hessel, D., and Grigsby, J. (2016). Fragile X-associated tremor/ataxia syndrome: another phenotype of the fragile X gene. *Clin. Neuropsychol.* 30, 810–814.
  8. Hunsaker, M.R., Arque, G., Berman, R.F., Willemsen, R., and Hukema, R.K. (2012). Mouse models of the fragile X premutation and the fragile X associated tremor/ataxia syndrome. *Results Probl. Cell Differ.* 54, 255–269.
  9. Hunsaker, M.R., Wenzel, H.J., Willemsen, R., and Berman, R.F. (2009). Progressive spatial processing deficits in a mouse model of the fragile X premutation. *Behav. Neurosci.* 123, 1315–1324.
  10. Chen, Y., Tassone, F., Berman, R.F., Hagerman, P.J., Hagerman, R.J., Willemsen, R., and Pessah, I.N. (2010). Murine hippocampal neurons expressing *Fmr1* gene premutations show early developmental deficits and late degeneration. *Hum. Mol. Genet.* 19, 196–208.
  11. Cunningham, C.L., Martínez Cerdeño, V., Navarro Porras, E., Prakash, A.N., Angelastro, J.M., Willemsen, R., Hagerman, P.J., Pessah, I.N., Berman, R.F., and Noctor, S.C. (2011). Premutation CGG-repeat expansion of the *Fmr1* gene impairs mouse neocortical development. *Hum. Mol. Genet.* 20, 64–79.
  12. Abekhoukh, S., Sahin, H.B., Grossi, M., Zongaro, S., Maurin, T., Madrigal, I., Kazue-Sugioka, D., Raas-Rothschild, A., Doulazmi, M., Carrera, P., et al. (2017). New insights into the regulatory function of CYFIP1 in the context of WAVE- and FMRP-containing complexes. *Dis. Model. Mech.* 10, 463–474.
  13. Zongaro, S., Hukema, R., D'Antoni, S., Davidovic, L., Barbry, P., Catania, M.V., Willemsen, R., Mari, B., and Bardoni, B. (2013). The 3' UTR of *FMR1* mRNA is a target of miR-101, miR-129-5p and miR-221: implications for the molecular pathology of FXTAS at the synapse. *Hum. Mol. Genet.* 22, 1971–1982.
  14. Nimchinsky, E.A., Oberlander, A.M., and Svoboda, K. (2001). Abnormal development of dendritic spines in *FMR1* knock-out mice. *J. Neurosci.* 21, 5139–5146.
  15. Maurin, T., Melancia, F., Jarjat, M., Castro, L., Costa, L., Delhaye, S., Khayachi, A., Castagnola, S., Mota, E., Di Giorgio, A., et al. (2018). Involvement of Phosphodiesterase 2A Activity in the Pathophysiology of Fragile X Syndrome. *Cereb. Cortex* 29, 3241–3252.
  16. Berman, R.F., Murray, K.D., Arque, G., Hunsaker, M.R., and Wenzel, H.J. (2012). Abnormal dendrite and spine morphology in primary visual cortex in the CGG knock-in mouse model of the fragile X premutation. *Epilepsia* 53 (Suppl 1), 150–160.
  17. Rottloff, S., Miguel, S., Biteau, F., Nisse, E., Hammann, P., Kuhn, L., Chicher, J., Bazile, V., Gaume, L., Mignard, B., et al. (2016). Proteome analysis of digestive fluids in *Nepenthes* pitchers. *Ann. Bot.* 117, 479–495.
  18. Chonchaiya, W., Schneider, A., and Hagerman, R.J. (2009). Fragile X: a family of disorders. *Adv. Pediatr.* 56, 165–186.
  19. Schluter, E.W., Hunsaker, M.R., Greco, C.M., Willemsen, R., and Berman, R.F. (2012). Distribution and frequency of intranuclear inclusions in female CGG KI mice modeling the fragile X premutation. *Brain Res.* 1472, 124–137.
  20. Entezam, A., Biacci, R., Orrison, B., Saha, T., Hoffman, G.E., Grabczyk, E., Nussbaum, R.L., and Usdin, K. (2007). Regional FMRP deficits and large repeat expansions into the full mutation range in a new Fragile X premutation mouse model. *Gene* 395, 125–134.
  21. Wang, J.Y., Trivedi, A.M., Carrillo, N.R., Yang, J., Schneider, A., Giulivi, C., Adams, P., Tassone, F., Kim, K., Rivera, S.M., et al. (2017). Open-Label Allopregnanolone Treatment of Men with Fragile X-Associated Tremor/Ataxia Syndrome. *Neurotherapeutics* 14, 1073–1083.
  22. Ma, L., Herren, A.W., Espinal, G., Randol, J., McLaughlin, B., Martínez-Cerdeño, V., Pessah, I.N., Hagerman, R.J., and Hagerman, P.J. (2019). Composition of the Intranuclear Inclusions of Fragile X-associated Tremor/Ataxia Syndrome. *Acta Neuropathol Commun* 7, 143.
  23. Yan, Z., Kim, E., Datta, D., Lewis, D.A., and Soderling, S.H. (2016). Synaptic Actin Dysregulation, a Convergent Mechanism of Mental Disorders? *J. Neurosci.* 36, 11411–11417.
  24. Mignogna, M.L., and D'Adamo, P. (2018). Critical importance of RAB proteins for synaptic function. *Small GTPases* 9, 145–157.
  25. Gao, Y., Wilson, G.R., Stephenson, S.E.M., Bozdoglu, K., Farrer, M.J., and Lockhart, P.J. (2018). The emerging role of Rab GTPases in the pathogenesis of Parkinson's disease. *Mov. Disord.* 33, 196–207.
  26. Vandeweyer, G., Van der Aa, N., Reyniers, E., and Kooy, R.F. (2012). The contribution of CLIP2 haploinsufficiency to the clinical manifestations of the Williams-Beuren syndrome. *Am. J. Hum. Genet.* 90, 1071–1078.
  27. Ramakers, G.J. (2002). Rho proteins, mental retardation and the cellular basis of cognition. *Trends Neurosci.* 25, 191–199.
  28. Hukema, R.K., Buijssen, R.A., Raske, C., Severijnen, L.A., Nieuwenhuizen-Bakker, I., Minneboon, M., Maas, A., de Crom, R., Kros, J.M., Hagerman, P.J., et al. (2014). Induced expression of expanded CGG RNA causes mitochondrial dysfunction in vivo. *Cell Cycle* 13, 2600–2608.
  29. Alvarez-Mora, M.L., Rodriguez-Revenga, L., Madrigal, I., Guitart-Mampel, M., Garrabou, G., and Milà, M. (2017). Impaired Mitochondrial Function and Dynamics in the Pathogenesis of FXTAS. *Mol. Neurobiol.* 54, 6896–6902.
  30. Naaijen, J., Lythgoe, D.J., Zwiers, M.P., Hartman, C.A., Hoekstra, P.J., Buitelaar, J.K., and Aarts, E. (2018). Anterior cingulate cortex glutamate and its association with striatal functioning during cognitive control. *Eur. Neuropsychopharmacol.* 28, 381–391.
  31. Carrillo-Mora, P., Sila-Adaya, D., and Villaseñor-Aguayo, K. (2013). Glutamate in Parkinson's disease: Role of anticholinergic drugs. *Basal Ganglia* 3, 147–157.
  32. O'Gorman Tuura, R.L., Baumann, C.R., and Baumann-Vogel, H. (2018). Beyond Dopamine: GABA, Glutamate, and the Axial Symptoms of Parkinson Disease. *Front. Neurol.* 9, 806.
  33. Gray, J.L., von Delft, F., and Brennan, P. (2019). Targeting the Small GTPase Superfamily through their Regulatory Proteins. *Angew. Chem. Int. Ed. Engl.* Published online March 14, 2019. <https://doi.org/10.1002/anie.201900585>.
  34. Xie, N., Gong, H., Suhl, J.A., Chopra, P., Wang, T., and Warren, S.T. (2016). Reactivation of *FMR1* by CRISPR/Cas9-Mediated Deletion of the Expanded CGG-Repeat of the Fragile X Chromosome. *PLoS ONE* 11, e0165499.
  35. Kilkenny, C., Browne, W.J., Cuthill, I.C., Emerson, M., and Altman, D.G. (2010). Improving bioscience research reporting: the ARRIVE guidelines for reporting animal research. *PLoS Biol.* 8, e1000412.
  36. Bontekoe, C.J., Bakker, C.E., Nieuwenhuizen, I.M., van der Linde, H., Lans, H., de Lange, D., Hirst, M.C., and Oostra, B.A. (2001). Instability of a (CGG)<sub>98</sub> repeat in the *Fmr1* promoter. *Hum. Mol. Genet.* 10, 1693–1699.
  37. Khalfallah, O., Jarjat, M., Davidovic, L., Nottet, N., Cestèle, S., Mantegazza, M., and Bardoni, B. (2017). Depletion of the Fragile X mental retardation protein in embryonic stem cells alters the kinetics of neurogenesis. *Stem Cells* 35, 374–385.
  38. Maurin, T., Lebrigand, K., Castagnola, S., Paquet, A., Jarjat, M., Popa, A., Grossi, M., Rage, F., and Bardoni, B. (2018). HITS-CLIP in various brain areas reveals new targets and new modalities of RNA binding by fragile X mental retardation protein. *Nucleic Acids Res.* 46, 6344–6355.
  39. Bardoni, B., Castets, M., Huot, M.E., Schenck, A., Adinolfi, S., Corbin, F., Pastore, A., Khandjian, E.W., and Mandel, J.-L. (2003). 82-FIP, a novel FMRP (fragile X mental retardation protein) interacting protein, shows a cell cycle-dependent intracellular localization. *Hum. Mol. Genet.* 12, 1689–1698.
  40. Huang, D.W., Sherman, B.T., Tan, Q., Collins, J.R., Alvord, W.G., Roayaei, J., Stephens, R., Baseler, M.W., Lane, H.C., and Lempicki, R.A. (2007). The DAVID Gene Functional Classification Tool: a novel biological module-centric algorithm to functionally analyze large gene lists. *Genome Biol.* 8, R183.

## **Supplemental Information**

### **Reduction of *Fmr1* mRNA Levels Rescues**

### **Pathological Features in Cortical**

### **Neurons in a Model of FXTAS**

**Malgorzata Drozd, Sébastien Delhayé, Thomas Maurin, Sara Castagnola, Mauro Grossi, Frédéric Brau, Marielle Jarjat, Rob Willemsen, Maria Capovilla, Renate K. Hukema, Enzo Lalli, and Barbara Bardoni**

## Supplementary Figure legends

**Supp. Figure 1. Dendritic arborization of WT and KI mouse cortical neurons.** (A) Representative images of cultured cortical WT and KI-CGG neurons. Scale bars: 20 $\mu$ m (B) Sholl analysis of cultured WT and KI-CGG mouse cortical neurons. A reduced arborization is observed for CGG-KI. Repeated measures ANOVA with two factors:  $f(1,72)=9.943$   $p=0.0024$ .

**Supp. Figure 2. Axons of 2 DIV cultures of KI-CGG cortical neurons are shorter than WT.** (A) Representative pictures of 2 days *in vitro* cultured WT and KI-CGG primary cortical neurons. Scale bars: 10  $\mu$ m. (B) Histogram of axon length of WT and KI-CGG. Results show the mean axon length  $\pm$  SEM of 150 randomly selected cells for each condition from three independent cultures. Mann-Whitney test \*\*\* $p<0.001$ .

Fig. S1

A



B



Fig. S2

A



WT

KI

B



Table S1. Proteins identified in the various samples by nanoLC MS/MS.

| LEGEND:             |                                                | ratio     |                                      | ratio                                                                                               |  | STATISTICS:                                                                |  |
|---------------------|------------------------------------------------|-----------|--------------------------------------|-----------------------------------------------------------------------------------------------------|--|----------------------------------------------------------------------------|--|
| # ratio             | KI-93 only, and ratio(KIscr/WT)>2              | # ratio   | KI-93 only, and ratio(KI93/WT)>2     | Columns EN, EP and ER                                                                               |  | Student t-test between 2 conditions, with 3 replicates for each condition. |  |
| # Spectra           | =1 spectrum in KI-scr samples                  | # Spectra | =1 spectrum in KI-93 samples         | p-values returned by the t-test are listed before the corresponding ratios (columns EO, EQ and ES). |  | Data have been normalized before statistics.                               |  |
| # Spectra           | =2-5 spectra in KI-scr samples                 | # Spectra | =2-5 spectra in KI-93 samples        | p-value <0.05                                                                                       |  |                                                                            |  |
| # Spectra           | =6-10 spectra in KI-scr samples                | # Spectra | =6-10 spectra in KI-93 samples       | p-value 0.05-0.10                                                                                   |  |                                                                            |  |
| # Spectra           | =11-30 spectra in KI-scr samples               | # Spectra | =11-30 spectra in KI-93 samples      |                                                                                                     |  |                                                                            |  |
| # Spectra           | =31 spectra minimum in KI-scr samples          | # Spectra | =31 spectra minimum in KI-93 samples |                                                                                                     |  |                                                                            |  |
| # ratio             | WT only, and ratio(KIscr/WT)<0.5               | # ratio   | KI-82 only, and ratio(KI82/WT)>2     |                                                                                                     |  |                                                                            |  |
| # Spectra           | =1 spectrum in WT samples                      | # Spectra | =1 spectrum in KI-82 samples         |                                                                                                     |  |                                                                            |  |
| # Spectra           | =2-5 spectra in WT samples                     | # Spectra | =2-5 spectra in KI-82 samples        |                                                                                                     |  |                                                                            |  |
| # Spectra           | =6-10 spectra in WT samples                    | # Spectra | =6-10 spectra in KI-82 samples       |                                                                                                     |  |                                                                            |  |
| # Spectra           | =11-30 spectra in WT samples                   | # Spectra | =11-30 spectra in KI-82 samples      |                                                                                                     |  |                                                                            |  |
| # Spectra           | =31 spectra minimum in WT samples              | # Spectra | =31 spectra minimum in KI-82 samples |                                                                                                     |  |                                                                            |  |
| UniProt annotations | It contains "trans", "dentit", "axon", "synap" |           |                                      |                                                                                                     |  |                                                                            |  |

NO FILTER

Total number of proteins:

| accession                                                                                        | description | protein_set_score | BASIC Spectral Count (Protein) |      |      |        |      |      |       |      |      |       |      |      |
|--------------------------------------------------------------------------------------------------|-------------|-------------------|--------------------------------|------|------|--------|------|------|-------|------|------|-------|------|------|
|                                                                                                  |             |                   | WT                             |      |      | KI-scr |      |      | KI-93 |      |      | KI-82 |      |      |
| Total Number of Proteins identified in a dedicated samples in the M.musculus taxonomy from UniPr |             |                   | 2047                           | 1979 | 1803 | 2053   | 2224 | 2069 | 2182  | 1854 | 1893 | 2039  | 1817 | 1718 |
| Concentration (µg/L) obtained after a Bradford assay (performed by the proteomics facility)      |             |                   | 2.08                           | 1.31 | 2.28 | 1.79   | 2.26 | 2.52 | 1.31  | 2.33 | 2.15 | 1.61  | 2.08 | 2.22 |

Proteins only identified in all 3 KI samples (scr + 93 + 82):

| accession              | description                                    | protein_set_score | Exp. from 01/02/2017           |   |   |        |   |   |       |   |   |       |   |   | Exp. 01/02/2017 |        |       |       |
|------------------------|------------------------------------------------|-------------------|--------------------------------|---|---|--------|---|---|-------|---|---|-------|---|---|-----------------|--------|-------|-------|
|                        |                                                |                   | BASIC Spectral Count (Protein) |   |   |        |   |   |       |   |   |       |   |   | # Repl.         |        |       |       |
|                        |                                                |                   | WT                             |   |   | KI-scr |   |   | KI-93 |   |   | KI-82 |   |   | WT              | KI-scr | KI-93 | KI-82 |
| sp Q6Z058 LARP1_MOUSE  | La-related protein 1 OS=Mus musculus (M        | 209.47            | 3                              | 2 | 1 | 2      | 1 | 1 | 1     | 1 | 1 | 1     | 1 | 1 | 0               | 3      | 1     | 1     |
| sp A2B40 ARI1_MOUSE    | AT-rich interactive domain-containing protein  | 144.43            | 3                              | 2 | 1 | 2      | 1 | 1 | 1     | 1 | 1 | 1     | 1 | 1 | 0               | 2      | 1     | 1     |
| sp P0DN34 NDU1_MOUSE   | NADH dehydrogenase [ubiquinone] 1 beta         | 35.77             | 2                              | 2 | 1 | 2      | 1 | 1 | 1     | 1 | 1 | 1     | 1 | 1 | 0               | 2      | 1     | 1     |
| sp Q0C0W1 YKT6_MOUSE   | Synaptobrevin homolog YKT6 OS=Mus mus          | 442.81            | 2                              | 1 | 2 | 2      | 1 | 1 | 1     | 1 | 1 | 1     | 1 | 1 | 0               | 3      | 1     | 3     |
| sp Q0PCX7 IRGMA_MOUSE  | Repulsive guidance molecule A OS=Mus m         | 102.65            | 2                              | 1 | 1 | 1      | 1 | 1 | 2     | 1 | 1 | 1     | 1 | 1 | 0               | 3      | 3     | 3     |
| sp Q0B25 EIF3K_MOUSE   | Eukaryotic translation initiation factor 3 sub | 153.19            | 2                              | 1 | 1 | 1      | 1 | 3 | 2     | 1 | 1 | 1     | 1 | 1 | 0               | 3      | 2     | 1     |
| sp Q8VFK0 CC50A_MOUSE  | Cell cycle control protein 50A OS=Mus mus      | 247.64            | 3                              | 1 | 1 | 1      | 1 | 1 | 1     | 1 | 1 | 1     | 1 | 1 | 0               | 2      | 1     | 1     |
| sp P24638 PPAL_MOUSE   | Lysosomal acid phosphatase OS=Mus mus          | 102.66            | 2                              | 1 | 1 | 1      | 1 | 1 | 2     | 1 | 1 | 1     | 1 | 1 | 0               | 2      | 2     | 1     |
| sp Q0R118 HTRA1_MOUSE  | Serine protease HTRA1 OS=Mus musculus          | 498.96            | 2                              | 1 | 1 | 1      | 1 | 1 | 2     | 1 | 1 | 1     | 1 | 1 | 0               | 2      | 1     | 1     |
| sp A2A699 F1712_MOUSE  | Protein FAM171A2 OS=Mus musculus (Mo           | 485.37            | 4                              | 1 | 2 | 2      | 2 | 2 | 2     | 1 | 2 | 2     | 1 | 2 | 0               | 3      | 1     | 3     |
| sp Q8VW6 UL1_MOUSE     | NEDD8-activating enzyme E1 regulatory sub      | 213.87            | 1                              | 3 | 2 | 1      | 1 | 1 | 2     | 2 | 1 | 1     | 1 | 1 | 0               | 3      | 2     | 1     |
| tr EPX228 EPX28_MOUSE  | Protein Pctm 10 OS=Mus musculus (Mouse         | 221.95            | 1                              | 1 | 3 | 1      | 1 | 1 | 1     | 1 | 1 | 1     | 1 | 1 | 0               | 3      | 2     | 1     |
| sp Q85239 AGR3_MOUSE   | Adhesion G protein-coupled receptor 33 O       | 479.09            | 1                              | 1 | 1 | 1      | 1 | 1 | 1     | 1 | 1 | 1     | 1 | 1 | 0               | 2      | 1     | 1     |
| sp Q0D50 AP1S2_MOUSE   | AP-1 complex subunit sigma2 OS=Mus m           | 148.57            | 1                              | 1 | 1 | 2      | 2 | 2 | 2     | 1 | 1 | 1     | 1 | 1 | 0               | 3      | 2     | 2     |
| sp P46414 CDN1_MOUSE   | Cyclin-dependent kinase inhibitor 1B OS=A      | 76.23             | 1                              | 1 | 1 | 1      | 1 | 1 | 1     | 1 | 1 | 1     | 1 | 1 | 0               | 3      | 3     | 3     |
| sp Q8CV8 TBCO_MOUSE    | Tubulin-specific chaperone E OS=Mus mus        | 97.68             | 1                              | 1 | 1 | 1      | 1 | 1 | 1     | 1 | 1 | 1     | 1 | 1 | 0               | 3      | 2     | 1     |
| sp Q85C22 ENDO1_MOUSE  | Endonuclease domain-containing 1 protein       | 218.67            | 1                              | 1 | 1 | 1      | 1 | 1 | 1     | 1 | 1 | 1     | 1 | 1 | 0               | 2      | 3     | 1     |
| sp Q03517 RCO2_MOUSE   | Secretogranin-2 OS=Mus musculus (Mouse         | 197.8             | 1                              | 1 | 1 | 5      | 1 | 1 | 1     | 1 | 1 | 1     | 1 | 1 | 0               | 2      | 1     | 1     |
| sp Q0R903 SYT11_MOUSE  | Synaptotagmin-11 OS=Mus musculus (Mox          | 54.01             | 1                              | 1 | 1 | 1      | 1 | 1 | 1     | 1 | 1 | 1     | 1 | 1 | 0               | 2      | 2     | 2     |
| sp Q08915 AIP_MOUSE    | AH receptor-interacting protein OS=Mus m       | 118.06            | 1                              | 1 | 1 | 1      | 1 | 1 | 1     | 1 | 1 | 1     | 1 | 1 | 0               | 2      | 2     | 1     |
| sp Q8XU9 EIF1B_MOUSE   | Eukaryotic translation initiation factor 1b O  | 72.41             | 1                              | 1 | 1 | 1      | 1 | 1 | 1     | 1 | 1 | 1     | 1 | 1 | 0               | 2      | 2     | 1     |
| sp Q80M7 AGF2_MOUSE    | AuF-GAP domain and FG repeat-containing        | 146.32            | 1                              | 1 | 1 | 1      | 1 | 1 | 1     | 1 | 1 | 1     | 1 | 1 | 0               | 2      | 1     | 1     |
| sp Q0D82 CJ035_MOUSE   | Uncharacterized protein C10orf35 homolog       | 57.2              | 1                              | 1 | 1 | 1      | 1 | 1 | 1     | 1 | 1 | 1     | 1 | 1 | 0               | 2      | 1     | 1     |
| sp Q92281 MACD1_MOUSE  | O-acetyl-ADP-ribose deacetylase MACROD         | 60.96             | 1                              | 1 | 1 | 1      | 1 | 1 | 1     | 1 | 1 | 1     | 1 | 1 | 0               | 2      | 2     | 1     |
| sp Q8C0F0 RM1_MOUSE    | 39S ribosomal protein L11, mitochondrial C     | 76.19             | 1                              | 1 | 1 | 1      | 1 | 1 | 1     | 1 | 1 | 1     | 1 | 1 | 0               | 2      | 1     | 1     |
| sp Q82F39 AGR3_MOUSE   | Adhesion G protein-coupled receptor 33 O       | 479.09            | 1                              | 1 | 1 | 1      | 1 | 1 | 1     | 1 | 1 | 1     | 1 | 1 | 0               | 2      | 1     | 1     |
| sp Q3UHX2 HAP2_MOUSE   | 28 kDa heat- and acid-stable phosphoprote      | 454.99            | 1                              | 1 | 1 | 2      | 2 | 2 | 2     | 1 | 1 | 1     | 1 | 1 | 0               | 2      | 1     | 1     |
| sp P55096 ABCD3_MOUSE  | ATP-binding cassette sub-family D member       | 548.53            | 1                              | 1 | 1 | 1      | 2 | 2 | 2     | 1 | 1 | 1     | 1 | 1 | 0               | 1      | 3     | 2     |
| sp Q99J36 THUM1_MOUSE  | THUMP domain-containing protein 1 OS=N         | 103.47            | 1                              | 1 | 1 | 1      | 1 | 1 | 1     | 1 | 1 | 1     | 1 | 1 | 0               | 1      | 2     | 1     |
| sp P52760 UK114_MOUSE  | Ribonuclease UK114 OS=Mus musculus (H          | 99.92             | 1                              | 1 | 1 | 1      | 1 | 1 | 2     | 1 | 1 | 1     | 1 | 1 | 0               | 1      | 1     | 1     |
| sp P49070 CAM1_MOUSE   | Cadherin-modulator protein 1 OS=Mus mus        | 213.39            | 1                              | 1 | 1 | 1      | 1 | 1 | 1     | 1 | 1 | 1     | 1 | 1 | 0               | 1      | 1     | 1     |
| sp Q08992 SDC1_MOUSE   | Syntenin-1 OS=Mus musculus (Mouse) GN          | 177.63            | 1                              | 1 | 1 | 1      | 1 | 1 | 1     | 1 | 1 | 1     | 1 | 1 | 0               | 1      | 1     | 1     |
| sp Q05186 RCN1_MOUSE   | Reticulocalbin-1 OS=Mus musculus (Mous         | 124.37            | 1                              | 1 | 1 | 1      | 1 | 1 | 1     | 1 | 1 | 1     | 1 | 1 | 0               | 1      | 1     | 1     |
| sp B9EJ88 OSB1_MOUSE   | Oxytetracycline-binding protein-related prote  | 209.82            | 1                              | 1 | 1 | 1      | 1 | 1 | 1     | 1 | 1 | 1     | 1 | 1 | 0               | 1      | 1     | 1     |
| tr Q8R27 GSRCT_MOUSE   | DEAD (Asp-Glu-His-Asp) box polypeptide 1'      | 187.86            | 2                              | 2 | 2 | 2      | 1 | 1 | 1     | 1 | 1 | 1     | 1 | 1 | 0               | 2      | 2     | 2     |
| sp Q4PDS3 SARM1_MOUSE  | Sialic alpha and TIR motif-containing prote    | 478.44            | 2                              | 2 | 2 | 2      | 2 | 2 | 1     | 1 | 1 | 1     | 1 | 1 | 0               | 2      | 1     | 2     |
| sp P46061 RAGP1_MOUSE  | Ran GTPase-activating protein 1 OS=Mus         | 316.86            | 2                              | 2 | 3 | 3      | 3 | 3 | 1     | 1 | 1 | 1     | 1 | 1 | 0               | 2      | 1     | 1     |
| sp Q08553 NFM_MOUSE    | Neurofilament medium polypeptide OS=Mu         | 294.41            | 2                              | 2 | 2 | 2      | 1 | 4 | 1     | 1 | 1 | 1     | 1 | 1 | 0               | 2      | 2     | 2     |
| sp Q8C189 FERM2_MOUSE  | Fermin family homolog 2 OS=Mus musculu         | 463.85            | 4                              | 1 | 1 | 2      | 1 | 1 | 2     | 1 | 1 | 1     | 1 | 1 | 0               | 2      | 3     | 1     |
| sp Q0D017 RAM10_MOUSE  | Armadillo repeat-containing protein 10 OS      | 300.99            | 2                              | 1 | 2 | 2      | 1 | 1 | 1     | 1 | 1 | 1     | 1 | 1 | 0               | 2      | 2     | 3     |
| sp Q0Z226 MECP2_MOUSE  | Methyl-CpG-binding protein 2 OS=Mus mu         | 297.23            | 2                              | 1 | 1 | 1      | 1 | 1 | 2     | 1 | 1 | 1     | 1 | 1 | 0               | 1      | 2     | 2     |
| sp Q8R0H0 GGA1_MOUSE   | ADP-ribosylation factor-binding protein GGA    | 393.51            | 2                              | 1 | 1 | 1      | 1 | 1 | 1     | 1 | 1 | 1     | 1 | 1 | 0               | 1      | 2     | 2     |
| sp Q0Z230 MTMR7_MOUSE  | Myotubularin-related protein 7 OS=Mus mu       | 145.49            | 2                              | 2 | 2 | 1      | 1 | 1 | 1     | 1 | 1 | 1     | 1 | 1 | 0               | 1      | 2     | 1     |
| sp Q8EPL8 IF07_MOUSE   | Intronin-7 OS=Mus musculus (Mouse) GN          | 688.61            | 1                              | 2 | 3 | 1      | 1 | 1 | 2     | 1 | 1 | 1     | 1 | 1 | 0               | 2      | 1     | 2     |
| sp Q0CYV4 LUTL_MOUSE   | Relative RNA-binding protein LUT4e1 O          | 219.87            | 2                              | 1 | 2 | 2      | 2 | 2 | 1     | 1 | 1 | 1     | 1 | 1 | 0               | 2      | 1     | 1     |
| sp P0C027 NUD10_MOUSE  | Diphosphoinositol polyphosphate phospho        | 323.65            | 2                              | 1 | 2 | 1      | 1 | 1 | 1     | 1 | 1 | 1     | 1 | 1 | 0               | 2      | 3     | 1     |
| sp Q8736 DHB7_MOUSE    | 3-keto-steroid reductase OS=Mus musculu        | 126.73            | 1                              | 2 | 1 | 1      | 1 | 1 | 1     | 1 | 1 | 1     | 1 | 1 | 0               | 2      | 2     | 1     |
| sp Q84152 BT3_MOUSE    | Transcription factor BT3 OS=Mus musculu        | 106.7             | 1                              | 2 | 1 | 1      | 1 | 1 | 1     | 1 | 1 | 1     | 1 | 1 | 0               | 2      | 1     | 1     |
| sp Q08110 U51_MOUSE    | U5 snRNP small nuclear ribonucleoprotei        | 466.46            | 1                              | 1 | 1 | 3      | 1 | 2 | 1     | 1 | 1 | 1     | 1 | 1 | 0               | 2      | 1     | 1     |
| sp Q8C570 RAE1L_MOUSE  | mRNA export factor OS=Mus musculus (M          | 138.31            | 2                              | 1 | 1 | 2      | 2 | 2 | 1     | 1 | 1 | 1     | 1 | 1 | 0               | 2      | 2     | 1     |
| sp Q9JM31 EDF1_MOUSE   | Endothelial differentiation-related factor 1   | 152.87            | 1                              | 1 | 1 | 2      | 1 | 2 | 1     | 1 | 1 | 1     | 1 | 1 | 0               | 2      | 1     | 1     |
| tr E9107 E9Q107_MOUSE  |                                                | 32.95             | 1                              | 1 | 1 | 2      | 1 | 1 | 1     | 1 | 1 | 1     | 1 | 1 | 0               | 2      | 1     | 1     |
| sp Q8C4M4 FPD1_MOUSE   | Prefoldin subunit 1 OS=Mus musculus (M         | 195.14            | 1                              | 1 | 1 | 1      | 2 | 1 | 2     | 1 | 1 | 1     | 1 | 1 | 0               | 2      | 2     | 2     |
| sp Q82289 TCM1_MOUSE   | Tetrahymena OS=Mus musculus (Mouse) GN         | 46.52             | 1                              | 1 | 1 | 1      | 1 | 1 | 1     | 1 | 1 | 1     | 1 | 1 | 0               | 2      | 2     | 3     |
| sp Q92472 RT02_MOUSE   | 28S ribosomal protein S2, mitochondrial ON     | 45.32             | 1                              | 1 | 1 | 1      | 1 | 1 | 1     | 1 | 1 | 1     | 1 | 1 | 0               | 2      | 1     | 1     |
| sp Q92572 2ABD_MOUSE   | Serine/threonine-protein phosphatase 2A 5      | 262.12            | 1                              | 1 | 1 | 1      | 1 | 1 | 1     | 1 | 1 | 1     | 1 | 1 | 0               | 2      | 2     | 1     |
| sp Q05633 EMM1_MOUSE   | Echinoderm microtubule-associated protei       | 69.59             | 1                              | 1 | 1 | 1      | 2 | 1 | 1     | 1 | 1 | 1     | 1 | 1 | 0               | 2      | 2     | 1     |
| sp Q03551 NFL_MOUSE    | Neurofilament light polypeptide OS=Mus m       | 328.62            | 1                              | 1 | 1 | 1      | 2 | 2 | 1     | 1 | 1 | 1     | 1 | 1 | 0               | 2      | 2     | 2     |
| sp Q0Z257 PLAK_MOUSE   | Junction plakoglobin OS=Mus musculus (M        | 351.57            | 1                              | 1 | 1 | 2      | 1 | 2 | 2     | 1 | 2 | 2     | 1 | 2 | 0               | 2      | 2     | 2     |
| sp Q8URW6 MYH14_MOUSE  | Myosin-14 OS=Mus musculus (Mouse) GN           | 409.38            | 1                              | 1 | 1 | 1      | 1 | 2 | 3     | 1 | 1 | 1     | 1 | 1 | 0               | 2      | 3     | 3     |
| sp Q8E870 TRIP_C_MOUSE | E3 ubiquitin-protein ligase TRIP12 OS=Mu       | 57.95             | 1                              | 1 | 1 | 1      | 1 | 1 | 1     | 1 | 1 | 1     | 1 | 1 | 0               | 2      | 2     | 1     |
| sp Q8BU14 SEC62_MOUSE  | Translocation protein SEC62 OS=Mus mus         | 141.23            | 1                              | 1 | 1 | 1      | 1 | 1 | 1     | 1 | 1 | 1     | 1 | 1 | 0               | 2      | 2     | 1     |
| sp P41202 OSG2_MOUSE   | COP9 signalosome complex subunit 2 OS          | 400.7             | 1                              | 1 | 1 | 1      | 1 | 1 | 1     | 1 | 1 | 1     | 1 | 1 | 0               | 2      | 1     | 2     |
| sp P41216 ACSL1_MOUSE  | Long-chain-fatty-acyl-CoA ligase 1 OS=M        | 285.75            | 1                              | 1 | 1 | 1      | 2 | 1 | 1     | 1 | 1 | 1     | 1 | 1 | 0               | 2      | 1     | 1     |
| sp Q035900 LSM2_MOUSE  | U6 snRNA-associated Sm-like protein LSM2       | 95.05             | 1                              | 1 | 1 | 1      | 1 | 1 | 1     | 1 | 1 | 1     | 1 | 1 | 0               | 2      | 1     | 3     |
| sp P97823 YPA1_MOUSE   | Acylprotein thioesterase 1 OS=Mus muscu        | 102.05            | 1                              | 1 | 1 | 1      | 1 | 1 | 1     | 1 | 1 | 1     | 1 | 1 | 0               | 2      | 1     | 1     |
| sp Q81686 CX45_MOUSE   |                                                |                   |                                |   |   |        |   |   |       |   |   |       |   |   |                 |        |       |       |

| Accession              | Description                                                   | Protein Set Score | 1 | 2 | 3 | 1 | 2 | 3 | 1 | 2 | 3 | 1 | 2 | 3 | # Rep.  | KI-scr / WT-scr | KI-93 / WT-scr | KI-82 / WT-scr |
|------------------------|---------------------------------------------------------------|-------------------|---|---|---|---|---|---|---|---|---|---|---|---|---------|-----------------|----------------|----------------|
| sp O35972 RM23_MOUSE   | 39S ribosomal protein L23, mitochondrial                      | 49.71             | 1 | 1 | 1 | 1 | 1 | 1 | 0 | 2 | 1 | 0 | 0 | 0 | 0.11728 | KI-scr only     | 0.37390        | KI-93 only     |
| sp Q8BGR6 ARL15_MOUSE  | ADP-ribosylation factor-like protein 15                       | 44.41             | 1 | 1 | 1 | 1 | 1 | 1 | 0 | 2 | 1 | 0 | 0 | 0 | 0.11728 | KI-scr only     | 0.37390        | KI-93 only     |
| sp Q8R466 NUP53_MOUSE  | Nucleoporin NUP53                                             | 35.48             | 1 | 1 | 1 | 1 | 1 | 1 | 0 | 2 | 1 | 0 | 0 | 0 | 0.11728 | KI-scr only     | 0.37390        | KI-93 only     |
| sp Q8V870 TMX1_MOUSE   | Thioredoxin-related transmembrane protein                     | 85.48             | 1 | 1 | 1 | 1 | 1 | 1 | 0 | 2 | 1 | 0 | 0 | 0 | 0.11728 | KI-scr only     | 0.37390        | KI-93 only     |
| sp Q6PH08 NAA3_MOUSE   | Nalpa-acetyltransferase 35, Na/C auxiliary                    | 115.24            | 1 | 1 | 1 | 1 | 1 | 1 | 0 | 2 | 1 | 0 | 0 | 0 | 0.11728 | KI-scr only     | 0.37390        | KI-93 only     |
| sp O05512 MARK2_MOUSE  | Serine/threonine-protein kinase MARK2                         | 278.66            | 1 | 1 | 1 | 1 | 1 | 1 | 0 | 2 | 1 | 0 | 0 | 0 | 0.11728 | KI-scr only     | 0.37390        | KI-93 only     |
| sp Q8C3F2 F120C_MOUSE  | Constitutive coactivator of PPAR-gamma-like                   | 219.45            | 1 | 1 | 1 | 2 | 1 | 1 | 0 | 2 | 1 | 0 | 0 | 0 | 0.11661 | KI-scr only     | 0.37390        | KI-93 only     |
| sp P11531 DMO1_MOUSE   | Hypoxanthine phosphoribosyl transferase                       | 52.75             | 1 | 1 | 1 | 1 | 1 | 1 | 0 | 2 | 1 | 0 | 0 | 0 | 0.11661 | KI-scr only     | 0.00005        | KI-93 only     |
| sp Q8V026 IMP3_MOUSE   | Inositol monophosphatase 3                                    | 81.94             | 1 | 1 | 1 | 2 | 1 | 1 | 0 | 0 | 1 | 2 | 0 | 0 | 0.37390 | KI-scr only     | 0.14329        | KI-93 only     |
| sp Q8P906 FKB15_MOUSE  | FK506-binding protein 15                                      | 63.91             | 1 | 1 | 1 | 2 | 1 | 1 | 0 | 0 | 1 | 1 | 0 | 0 | 0.37390 | KI-scr only     | 0.37390        | KI-93 only     |
| sp Q8C166 CPNE1_MOUSE  | Copine-1                                                      | 142.14            | 1 | 1 | 1 | 2 | 1 | 1 | 0 | 0 | 1 | 1 | 0 | 0 | 0.37390 | KI-scr only     | 0.37390        | KI-93 only     |
| sp Q62WV2 Q62WV_MOUSE  | Theta 4, X chromosome                                         | 48.74             | 1 | 1 | 1 | 1 | 1 | 1 | 0 | 0 | 1 | 1 | 0 | 0 | 0.37390 | KI-scr only     | 0.37390        | KI-93 only     |
| sp P49769 PSM1_MOUSE   | Presenilin-1                                                  | 37.89             | 1 | 1 | 1 | 1 | 1 | 1 | 0 | 0 | 1 | 1 | 0 | 0 | 0.37390 | KI-scr only     | 0.37390        | KI-93 only     |
| sp Q01G21 G21_MOUSE    | Phosphomevalonate kinase                                      | 159.96            | 2 | 2 | 1 | 1 | 1 | 1 | 0 | 0 | 2 | 1 | 0 | 0 | 0.11626 | KI-scr only     | 0.37390        | KI-93 only     |
| sp Q6Z008 CNOT1_MOUSE  | OCR4-NOT transcription complex subunit 1                      | 236.17            | 2 | 2 | 1 | 2 | 1 | 1 | 0 | 0 | 2 | 1 | 0 | 0 | 0.15432 | KI-scr only     | 0.37390        | KI-93 only     |
| sp Q6R216 NDT4_MOUSE   | Diphosphoinositidyl polyphosphate phosphatase                 | 148.53            | 2 | 2 | 1 | 1 | 1 | 1 | 0 | 0 | 2 | 2 | 0 | 0 | 0.37390 | KI-scr only     | 0.11624        | KI-93 only     |
| sp Q8EKR1 PPT2_MOUSE   | Receptor-type tyrosine-protein phosphatase                    | 135.73            | 2 | 2 | 1 | 1 | 1 | 1 | 0 | 0 | 1 | 1 | 0 | 0 | 0.37390 | KI-scr only     | 0.18328        | KI-93 only     |
| sp A9C473 A9C473_MOUSE | Protein A630010A05Rik (Fragment)                              | 31.7              | 2 | 2 | 2 | 2 | 2 | 2 | 0 | 0 | 1 | 1 | 0 | 0 | 0.37390 | KI-scr only     | 0.37390        | KI-93 only     |
| sp P70429 EVL_MOUSE    | Ena/VASP-like protein                                         | 380.87            | 2 | 2 | 2 | 2 | 2 | 2 | 0 | 0 | 1 | 1 | 0 | 0 | 0.37390 | KI-scr only     | 0.37390        | KI-93 only     |
| sp Q3UE37 UBE2Z_MOUSE  | Ubiquitin-conjugating enzyme E2 Z                             | 163.62            | 2 | 2 | 1 | 1 | 1 | 1 | 0 | 0 | 1 | 2 | 0 | 0 | 0.37390 | KI-scr only     | 0.11834        | KI-93 only     |
| sp P53811 PMP2_MOUSE   | Phosphatidylinositol transfer protein beta 1                  | 174.35            | 2 | 2 | 1 | 1 | 1 | 1 | 0 | 0 | 1 | 1 | 0 | 0 | 0.37390 | KI-scr only     | 0.37390        | KI-93 only     |
| sp P22315 HEMH_MOUSE   | Ferrochelatase, mitochondrial                                 | 126.93            | 2 | 2 | 1 | 1 | 1 | 1 | 0 | 0 | 1 | 1 | 0 | 0 | 0.37390 | KI-scr only     | 0.37390        | KI-93 only     |
| sp Q64737 PUR2_MOUSE   | Trifunctional purine biosynthetic protein                     | 223.96            | 1 | 2 | 1 | 1 | 2 | 1 | 0 | 0 | 2 | 2 | 0 | 0 | 0.16239 | KI-scr only     | 0.17504        | KI-93 only     |
| sp P26039 TLN1_MOUSE   | Talin-1                                                       | 163.8             | 1 | 1 | 1 | 1 | 1 | 1 | 0 | 0 | 2 | 2 | 0 | 0 | 0.11626 | KI-scr only     | 0.11834        | KI-93 only     |
| sp D44FX7 DAFX7_MOUSE  | Protein Dnaaj13                                               | 128.46            | 1 | 1 | 1 | 1 | 1 | 1 | 0 | 0 | 2 | 2 | 0 | 0 | 0.11626 | KI-scr only     | 0.11834        | KI-93 only     |
| sp Q3TAS6 EMC10_MOUSE  | ER membrane protein complex subunit 10                        | 86.8              | 1 | 1 | 1 | 1 | 1 | 1 | 0 | 0 | 1 | 1 | 0 | 0 | 0.11626 | KI-scr only     | 0.37390        | KI-93 only     |
| sp Q8K120 COO9_MOUSE   | Ubiquitin ubiquitin-protein complex COO9, mb                  | 112.45            | 1 | 1 | 1 | 1 | 1 | 1 | 0 | 0 | 2 | 1 | 0 | 0 | 0.11626 | KI-scr only     | 0.37390        | KI-93 only     |
| sp Q920A5 RSC_MOUSE    | Retinoid-inducible serine carboxypeptidase                    | 78.79             | 1 | 1 | 1 | 1 | 1 | 1 | 0 | 0 | 2 | 1 | 0 | 0 | 0.11626 | KI-scr only     | 0.37390        | KI-93 only     |
| sp P83870 PHF5A_MOUSE  | PHD finger-like domain-containing protein 5                   | 189.55            | 1 | 1 | 1 | 1 | 1 | 1 | 0 | 0 | 2 | 1 | 0 | 0 | 0.11626 | KI-scr only     | 0.37390        | KI-93 only     |
| sp Q7T741 MBE1A_MOUSE  | Myo-binding protein 1A                                        | 303.45            | 1 | 1 | 1 | 1 | 1 | 1 | 0 | 0 | 2 | 1 | 0 | 0 | 0.11626 | KI-scr only     | 0.37390        | KI-93 only     |
| sp E9Q740 E9Q740_MOUSE | Protein Sp72                                                  | 466.95            | 1 | 1 | 1 | 1 | 1 | 1 | 0 | 0 | 2 | 1 | 0 | 0 | 0.11626 | KI-scr only     | 0.37390        | KI-93 only     |
| sp Q9WU28 PF05_MOUSE   | Prefoldin subunit 5                                           | 156.04            | 1 | 1 | 1 | 1 | 1 | 1 | 0 | 0 | 2 | 1 | 0 | 0 | 0.11626 | KI-scr only     | 0.37390        | KI-93 only     |
| sp Q9CY27 TECR_MOUSE   | Very-long-chain enoyl-CoA reductase                           | 200.24            | 1 | 1 | 1 | 1 | 1 | 1 | 0 | 0 | 2 | 1 | 0 | 0 | 0.11626 | KI-scr only     | 0.37390        | KI-93 only     |
| sp Q35V16 RPK2_MOUSE   | Rap1 GTPase-activating protein 2                              | 43.76             | 1 | 1 | 1 | 1 | 1 | 1 | 0 | 0 | 2 | 1 | 0 | 0 | 0.11626 | KI-scr only     | 0.37390        | KI-93 only     |
| sp Q9K0C4 CPS1A_MOUSE  | Lanosterol 14-alpha demethylase                               | 334.38            | 1 | 1 | 1 | 1 | 1 | 1 | 0 | 0 | 2 | 2 | 0 | 0 | 0.11626 | KI-scr only     | 0.11624        | KI-93 only     |
| sp Q9R1V7 ADK3_MOUSE   | Disintegrin and metalloproteinase domain-containing protein 3 | 69.29             | 1 | 2 | 1 | 1 | 1 | 1 | 0 | 0 | 1 | 1 | 0 | 0 | 0.37390 | KI-scr only     | 0.37390        | KI-93 only     |
| sp Q9H393 PLXD1_MOUSE  | Plexin-D1                                                     | 64.86             | 1 | 1 | 1 | 1 | 1 | 1 | 0 | 0 | 1 | 2 | 0 | 0 | 0.37390 | KI-scr only     | 0.11948        | KI-93 only     |
| sp P50544 ACADV_MOUSE  | Very-long-chain specific acyl-CoA dehydrogenase               | 276.89            | 1 | 1 | 1 | 1 | 1 | 1 | 0 | 0 | 1 | 2 | 0 | 0 | 0.37390 | KI-scr only     | 0.11948        | KI-93 only     |
| sp Q9R313 EXOC8_MOUSE  | Exocyst complex component 8                                   | 70.99             | 1 | 1 | 1 | 1 | 1 | 1 | 0 | 0 | 1 | 2 | 0 | 0 | 0.37390 | KI-scr only     | 0.11834        | KI-93 only     |
| sp Q8BNW9 KBTB_MOUSE   | Kelch repeat and BTB domain-containing protein 9              | 65.66             | 1 | 1 | 1 | 1 | 1 | 1 | 0 | 0 | 1 | 2 | 0 | 0 | 0.37390 | KI-scr only     | 0.11834        | KI-93 only     |
| sp Q3TDQ1 STT3B_MOUSE  | Dolichyl-diphosphoglycerate-protein                           | 140.56            | 1 | 1 | 1 | 1 | 1 | 1 | 0 | 0 | 1 | 2 | 0 | 0 | 0.37390 | KI-scr only     | 0.11834        | KI-93 only     |
| sp Q8VHY0 CSPG4_MOUSE  | Chondroitin sulfate proteoglycan 4                            | 65.04             | 1 | 1 | 1 | 1 | 1 | 1 | 0 | 0 | 1 | 1 | 0 | 0 | 0.37390 | KI-scr only     | 0.37390        | KI-93 only     |
| sp Q8D766 ACAD8_MOUSE  | Acyl-CoA oxidase 8, mitochondrial                             | 46                | 1 | 1 | 1 | 1 | 1 | 1 | 0 | 0 | 1 | 1 | 0 | 0 | 0.37390 | KI-scr only     | 0.37390        | KI-93 only     |
| sp Q9R1X9 ZFNB2_MOUSE  | ANK repeat and zinc finger protein ZFNB2                      | 44.42             | 1 | 1 | 1 | 1 | 1 | 1 | 0 | 0 | 1 | 1 | 0 | 0 | 0.37390 | KI-scr only     | 0.37390        | KI-93 only     |
| sp Q7T5Y6 CELFA_MOUSE  | CUGBP Elav-like family member 4                               | 127.95            | 1 | 1 | 1 | 1 | 1 | 1 | 0 | 0 | 1 | 1 | 0 | 0 | 0.37390 | KI-scr only     | 0.37390        | KI-93 only     |
| sp Q04690 INF1_MOUSE   | Proteasome activator complex subunit 2                        | 205.39            | 1 | 1 | 1 | 1 | 1 | 1 | 0 | 0 | 1 | 1 | 0 | 0 | 0.37390 | KI-scr only     | 0.37390        | KI-93 only     |
| sp P97372 PSM2_MOUSE   | Proteasome activator complex subunit 2 C                      | 112.16            | 1 | 1 | 1 | 1 | 1 | 1 | 0 | 0 | 1 | 1 | 0 | 0 | 0.37390 | KI-scr only     | 0.37390        | KI-93 only     |
| sp Q9D067 MCT1_MOUSE   | Malignant cell-associated sequence 1                          | 285.27            | 1 | 1 | 1 | 1 | 1 | 1 | 0 | 0 | 1 | 1 | 0 | 0 | 0.37390 | KI-scr only     | 0.37390        | KI-93 only     |
| sp Q3UHK6 TEN4_MOUSE   | Tensin-4                                                      | 96.83             | 1 | 1 | 1 | 1 | 1 | 1 | 0 | 0 | 1 | 1 | 0 | 0 | 0.37390 | KI-scr only     | 0.37390        | KI-93 only     |
| sp Q8CH72 TR13_MOUSE   | E3 ubiquitin-protein ligase TRIM32                            | 50.98             | 1 | 1 | 1 | 1 | 1 | 1 | 0 | 0 | 1 | 1 | 0 | 0 | 0.37390 | KI-scr only     | 0.37390        | KI-93 only     |
| sp Q35459 ECH1_MOUSE   | Delta(3,5)Delta(2,4)dienoyl-CoA isomerase                     | 90.64             | 1 | 1 | 1 | 1 | 1 | 1 | 0 | 0 | 1 | 1 | 0 | 0 | 0.37390 | KI-scr only     | 0.37390        | KI-93 only     |
| sp Q89863 STX6_MOUSE   | Syntaxin-6                                                    | 76.02             | 1 | 1 | 1 | 1 | 1 | 1 | 0 | 0 | 1 | 1 | 0 | 0 | 0.37390 | KI-scr only     | 0.37390        | KI-93 only     |
| sp D3YW03 D3YW03_MOUSE | Dicyclophosphatase                                            | 146.89            | 1 | 1 | 1 | 1 | 1 | 1 | 0 | 0 | 1 | 1 | 0 | 0 | 0.37390 | KI-scr only     | 0.37390        | KI-93 only     |
| sp Q8C0L0 TMX4_MOUSE   | Thioredoxin-related transmembrane protein                     | 239.26            | 1 | 1 | 1 | 1 | 1 | 1 | 0 | 0 | 1 | 1 | 0 | 0 | 0.37390 | KI-scr only     | 0.37390        | KI-93 only     |
| sp Q8K3C3 LZIC_MOUSE   | Protein LZIC                                                  | 194.67            | 2 | 2 | 1 | 1 | 1 | 1 | 0 | 0 | 1 | 1 | 0 | 0 | 0.37390 | KI-scr only     | 0.37390        | KI-93 only     |
| sp Q7TN66 IGS21_MOUSE  | Immunoglobulin superfamily member 21                          | 184.28            | 1 | 2 | 1 | 1 | 1 | 1 | 0 | 0 | 1 | 1 | 0 | 0 | 0.37390 | KI-scr only     | 0.37390        | KI-93 only     |
| sp Q9B917 L2L1_MOUSE   | Leish2 ligand larva protein                                   | 101.38            | 1 | 1 | 1 | 1 | 1 | 1 | 0 | 0 | 1 | 1 | 0 | 0 | 0.37390 | KI-scr only     | 0.37390        | KI-93 only     |
| sp Q9R001 PDXK1_MOUSE  | Pyridoxal-dependent decarboxylase domain-containing protein 1 | 50.61             | 1 | 1 | 1 | 1 | 1 | 1 | 0 | 0 | 1 | 1 | 0 | 0 | 0.37390 | KI-scr only     | 0.37390        | KI-93 only     |
| sp P32233 DRG1_MOUSE   | Developmentally-regulated GTP-binding protein 2.4             | 38.76             | 1 | 1 | 1 | 1 | 1 | 1 | 0 | 0 | 1 | 1 | 0 | 0 | 0.37390 | KI-scr only     | 0.37390        | KI-93 only     |
| sp Q9C062 DECR_MOUSE   | 2.4-dienoyl-CoA reductase, mitochondrial                      | 106.01            | 1 | 1 | 1 | 1 | 1 | 1 | 0 | 0 | 1 | 1 | 0 | 0 | 0.37390 | KI-scr only     | 0.37390        | KI-93 only     |
| sp Q6N200 DNJC8_MOUSE  | DnaJ homolog subfamily C member 8                             | 138.44            | 1 | 1 | 1 | 1 | 1 | 1 | 0 | 0 | 1 | 1 | 0 | 0 | 0.37390 | KI-scr only     | 0.37390        | KI-93 only     |
| sp D8R354 PLXB2_MOUSE  | Plexin-B2                                                     | 287.35            | 1 | 1 | 1 | 1 | 1 | 1 | 0 | 0 | 1 | 1 | 0 | 0 | 0.37390 | KI-scr only     | 0.37390        | KI-93 only     |
| sp Q9G0S1 SCMC3_MOUSE  | Calcium-binding mitochondrial carrier protein                 | 104.92            | 1 | 1 | 1 | 1 | 1 | 1 | 0 | 0 | 1 | 1 | 0 | 0 | 0.37390 | KI-scr only     | 0.37390        | KI-93 only     |
| sp Q9C0M5 TXD17_MOUSE  | Thioredoxin domain-containing protein 17                      | 108.04            | 1 | 1 | 1 | 1 | 1 | 1 | 0 | 0 | 1 | 1 | 0 | 0 | 0.37390 | KI-scr only     | 0.37390        | KI-93 only     |
| sp Q9L533 SERB_MOUSE   | Phosphoserine phosphatase                                     | 64.08             | 1 | 1 | 1 | 2 | 1 | 1 | 0 | 0 | 1 | 2 | 0 | 0 | 0.37390 | KI-scr only     | 0.16207        | KI-93 only     |
| sp Q9B327 GBZ5_MOUSE   | Guanine nucleotide-binding protein G(I)/G(S)                  | 60.71             | 1 | 1 | 1 | 1 | 1 | 1 | 0 | 0 | 1 | 1 | 0 | 0 | 0.37390 | KI-scr only     | 0.37390        | KI-93 only     |
| sp Q8R2Y8 PTH2_MOUSE   | Peptidyl-HRNA hydrolase 2, mitochondrial                      | 151.              |   |   |   |   |   |   |   |   |   |   |   |   |         |                 |                |                |



|                        |                                             |                             |        |   |   |   |   |   |         |             |
|------------------------|---------------------------------------------|-----------------------------|--------|---|---|---|---|---|---------|-------------|
| sp O9CY0 NJMU_MOUSE    | Protein Njmu-R1                             | OS=Mus musculus (Mouse)     | 35.19  | 1 | 0 | 1 | 0 | 0 | 0.37390 | Ki-scr only |
| sp O9C23 DJCT0_MOUSE   | DnaI homolog subfamily C member 10          | OS=                         | 33.44  | 1 | 0 | 1 | 0 | 0 | 0.37390 | Ki-scr only |
| sp O9ZK3 SYNE2_MOUSE   | Nesprin-2                                   | OS=Mus musculus (Mouse) GN= | 32.42  | 1 | 0 | 1 | 0 | 0 | 0.37390 | Ki-scr only |
| sp P59708 SF3B6_MOUSE  | Splicing factor 3B subunit 6                | OS=Mus musc.                | 32.05  | 1 | 0 | 1 | 0 | 0 | 0.37390 | Ki-scr only |
| sp O9DBR4 APBB2_MOUSE  | Amyloid beta A4 precursor protein-binding f |                             | 31.92  | 1 | 0 | 1 | 0 | 0 | 0.37390 | Ki-scr only |
| sp O3Q4D0 WDR41_MOUSE  | WD repeat-containing protein 41             | OS=Mus i                    | 31.88  | 1 | 0 | 1 | 0 | 0 | 0.37390 | Ki-scr only |
| sp P78404 TAGL_MOUSE   | Transgelin                                  | OS=Mus musculus (Mouse) GN= | 31.86  | 1 | 0 | 1 | 0 | 0 | 0.37390 | Ki-scr only |
| sp O9Q0B15 RM12_MOUSE  | 39S ribosomal protein L12                   | mitochondrial C             | 31.15  | 1 | 0 | 1 | 0 | 0 | 0.37390 | Ki-scr only |
| sp O55074 AKA7A_MOUSE  | A-kinase anchor protein 7 isoform alpha     | OS=                         | 29.95  | 1 | 0 | 1 | 0 | 0 | 0.37390 | Ki-scr only |
| sp O7T3C3 NEK5_MOUSE   | Serine/threonine-protein kinase Nek5        | OS=M                        | 29.79  | 1 | 0 | 1 | 0 | 0 | 0.37390 | Ki-scr only |
| sp O8R1M4 NUOC3_MOUSE  | NuclD domain-containing protein 3           | OS=Mus                      | 141.89 | 1 | 0 | 1 | 0 | 0 | 0.37390 | Ki-scr only |
| sp O5S5F2 LCT1_3_MOUSE | Lactoferrin-like protein 3                  | OS=Mus muscu                | 186.6  | 1 | 0 | 1 | 0 | 0 | 0.37390 | Ki-scr only |
| sp P60904 DNAC5_MOUSE  | DnaI homolog subfamily C member 5           | OS=                         | 311.67 | 1 | 0 | 1 | 0 | 0 | 0.37390 | Ki-scr only |
| sp O9J90 RNF14_MOUSE   | E3 ubiquitin-protein ligase RNF14           | OS=Mu                       | 263.19 | 1 | 0 | 1 | 0 | 0 | 0.37390 | Ki-scr only |
| sp O9D710 TMX2_MOUSE   | Thioredoxin-related transmembrane protein   |                             | 180.02 | 1 | 0 | 1 | 0 | 0 | 0.37390 | Ki-scr only |
| sp O9Z0J0 NFC2_MOUSE   | Epididymal secretory protein E1             | OS=Mus n                    | 63.99  | 1 | 0 | 1 | 0 | 0 | 0.37390 | Ki-scr only |
| sp O9BR93 F177A_MOUSE  | Protein FAM177A1                            | OS=Mus musculus (M          | 183.01 | 1 | 0 | 1 | 0 | 0 | 0.37390 | Ki-scr only |
| sp O5S19 CLU_MOUSE     | Clustered mitochondria protein homolog      | OS=                         | 200.53 | 1 | 0 | 1 | 0 | 0 | 0.37390 | Ki-scr only |
| sp O55135 IF6_MOUSE    | Eukaryotic translation initiation factor 6  | OS=                         | 96.91  | 1 | 0 | 1 | 0 | 0 | 0.37390 | Ki-scr only |
| sp O9DA02 IFT22_MOUSE  | Intraflagellar transport protein 22 homolog |                             | 44.56  | 1 | 0 | 1 | 0 | 0 | 0.37390 | Ki-scr only |

### Proteins only identified in 1 KI sample (KI-93):

| accession              | description                                     | protein_set_score | Exp. from 01/02/2017           |    |   |        |   |   |       |   |   |       |        |       | Exp. 01/02/2017 |                 |       |                |       |            |  |
|------------------------|-------------------------------------------------|-------------------|--------------------------------|----|---|--------|---|---|-------|---|---|-------|--------|-------|-----------------|-----------------|-------|----------------|-------|------------|--|
|                        |                                                 |                   | BASIC Spectral Count (Proline) |    |   |        |   |   |       |   |   |       |        |       | Exp. 01/02/2017 |                 |       |                |       |            |  |
|                        |                                                 |                   | WT                             |    |   | Ki-scr |   |   | KI-93 |   |   | KI-82 |        |       | # Repl.         | Ki-scr / WT-scr |       | KI-93 / WT-scr |       |            |  |
| 1                      | 2                                               | 3                 | 1                              | 2  | 3 | 1      | 2 | 3 | 1     | 2 | 3 | WT    | Ki-scr | KI-93 | KI-82           | pvalue          | ratio | pvalue         | ratio |            |  |
| sp O8K4R4 PITC1_MOUSE  | Cytoplasmic phosphatidylinositol transfer pn    | 303.78            |                                |    |   | 2      | 2 | 1 |       |   |   |       |        | 0     | 0               | 3               | 0     | 0.00715        |       | KI-93 only |  |
| sp O3587 CALU1_MOUSE   | Calumenin                                       | 434.64            |                                |    |   | 4      | 4 | 1 |       |   |   |       |        | 0     | 0               | 1               | 0     | 0.37390        |       | KI-93 only |  |
| sp O9R4F1 NTNG2_MOUSE  | Netrin-G2                                       | 92.39             |                                |    |   | 2      |   |   |       |   |   |       |        | 0     | 0               | 1               | 0     | 0.37390        |       | KI-93 only |  |
| sp O9CRD0 OCAD1_MOUSE  | OCIA domain-containing protein 1                | 147.41            |                                |    |   | 2      |   |   |       |   |   |       |        | 0     | 0               | 1               | 0     | 0.37390        |       | KI-93 only |  |
| sp O9D6U8 F162A_MOUSE  | Protein FAM162A                                 | 107.03            |                                |    |   | 2      |   |   |       |   |   |       |        | 0     | 0               | 1               | 0     | 0.37390        |       | KI-93 only |  |
| sp P5508 AQR1_MOUSE    | Aquaporin-4                                     | 96.51             |                                |    |   | 1      | 1 | 1 |       |   |   |       |        | 0     | 0               | 3               | 0     | 0.00005        |       | KI-93 only |  |
| sp O1290 CAC1E_MOUSE   | Voltage-dependent L-type calcium channel        | 39.61             |                                |    |   | 1      | 1 | 1 |       |   |   |       |        | 0     | 0               | 0               | 0     | 0.00005        |       | KI-93 only |  |
| sp O8R180 ERO1A_MOUSE  | ERO1-like protein alpha                         | 146.71            |                                |    |   | 1      | 1 | 1 |       |   |   |       |        | 0     | 0               | 3               | 0     | 0.00005        |       | KI-93 only |  |
| sp O08842 GFR2_MOUSE   | GDNF family receptor alpha-2                    | 64.44             |                                |    |   | 1      | 1 | 1 |       |   |   |       |        | 0     | 0               | 2               | 0     | 0.11948        |       | KI-93 only |  |
| sp O9B8D7 CRT1_MOUSE   | CREB-regulated transcription coactivator 1      | 104.36            |                                |    |   | 1      | 1 | 1 |       |   |   |       |        | 0     | 0               | 2               | 0     | 0.11948        |       | KI-93 only |  |
| sp P5524 AKK_MOUSE     | Adenosine kinase                                | 76.21             |                                |    |   | 1      |   |   |       |   |   |       |        | 0     | 0               | 1               | 0     | 0.11834        |       | KI-93 only |  |
| sp O9WVE8 PACN2_MOUSE  | Protein kinase C and casein kinase substra      | 101.97            |                                |    |   | 1      |   | 1 |       |   |   |       |        | 0     | 0               | 1               | 0     | 0.37390        |       | KI-93 only |  |
| sp P62500 T2D1_MOUSE   | TSC22 domain family protein 1                   | 73.41             |                                |    |   | 1      |   |   |       |   |   |       |        | 0     | 0               | 1               | 0     | 0.37390        |       | KI-93 only |  |
| sp O35075 DSCR3_MOUSE  | Down syndrome critical region protein 3 hon     | 62.36             |                                |    |   | 1      |   |   |       |   |   |       |        | 0     | 0               | 1               | 0     | 0.37390        |       | KI-93 only |  |
| sp O9CR62 NHAF2_MOUSE  | H/ACA ribonucleoprotein complex subunit 2       | 55.19             |                                |    |   | 1      |   |   |       |   |   |       |        | 0     | 0               | 1               | 0     | 0.37390        |       | KI-93 only |  |
| sp P42275 STAT3_MOUSE  | Signal transducer and activator of transcript   | 107.81            |                                |    |   | 1      |   |   |       |   |   |       |        | 0     | 0               | 1               | 0     | 0.37390        |       | KI-93 only |  |
| sp O9D116 RM14_MOUSE   | 39S ribosomal protein L14                       | 72.85             |                                |    |   | 1      |   |   |       |   |   |       |        | 0     | 0               | 1               | 0     | 0.37390        |       | KI-93 only |  |
| sp O88986 KBL_MOUSE    | 2-amino-3-ketobutyrate coenzyme A ligase        | 71.94             |                                |    |   | 1      |   |   |       |   |   |       |        | 0     | 0               | 1               | 0     | 0.37390        |       | KI-93 only |  |
| sp P70445 HEBP2_MOUSE  | Eukaryotic translation initiation factor 4E-bin | 70.75             |                                |    |   | 1      |   |   |       |   |   |       |        | 0     | 0               | 1               | 0     | 0.37390        |       | KI-93 only |  |
| sp O9Z313 TGO1_MOUSE   | Tango-3 network integral protein                | 64.23             |                                |    |   | 1      |   |   |       |   |   |       |        | 0     | 0               | 1               | 0     | 0.37390        |       | KI-93 only |  |
| sp O8BV15 STX16_MOUSE  | Syntaxin-16                                     | 61.94             |                                |    |   | 1      |   |   |       |   |   |       |        | 0     | 0               | 1               | 0     | 0.37390        |       | KI-93 only |  |
| sp O8B84 MA3_MOUSE     | Melanoma inhibitory activity protein 3          | 60.44             |                                |    |   | 1      |   |   |       |   |   |       |        | 0     | 0               | 1               | 0     | 0.37390        |       | KI-93 only |  |
| sp O8M65 NYP2_MOUSE    | Neuronal tyrosine-phosphorylated phospho        | 58.06             |                                |    |   | 1      |   |   |       |   |   |       |        | 0     | 0               | 1               | 0     | 0.37390        |       | KI-93 only |  |
| sp O9R0M0 CELR2_MOUSE  | Cadherin EGF_LAG seven-pass G-type rec          | 52.45             |                                |    |   | 1      |   |   |       |   |   |       |        | 0     | 0               | 1               | 0     | 0.37390        |       | KI-93 only |  |
| sp P50429 ARSB_MOUSE   | Arylsulfatase B                                 | 48.93             |                                |    |   | 1      |   |   |       |   |   |       |        | 0     | 0               | 1               | 0     | 0.37390        |       | KI-93 only |  |
| sp O7T3C1 PRC2A_MOUSE  | Protein PRRC2A                                  | 44.92             |                                |    |   | 1      |   |   |       |   |   |       |        | 0     | 0               | 1               | 0     | 0.37390        |       | KI-93 only |  |
| sp O9E006 DHB11_MOUSE  | Estradiol 17-beta-dehydrogenase 11              | 42.2              |                                |    |   | 1      |   |   |       |   |   |       |        | 0     | 0               | 1               | 0     | 0.37390        |       | KI-93 only |  |
| sp O9VE44 IM40_MOUSE   | Mitochondrial intermembrane space import        | 41.37             |                                |    |   | 1      |   |   |       |   |   |       |        | 0     | 0               | 1               | 0     | 0.37390        |       | KI-93 only |  |
| sp O9ER00 SCAM2_MOUSE  | Serine/cysteine-aminotransferase membrane prot  | 39.89             |                                |    |   | 1      |   |   |       |   |   |       |        | 0     | 0               | 1               | 0     | 0.37390        |       | KI-93 only |  |
| sp O9VBD0 QOVBDO_MOUSE | Integrin beta                                   | 37.95             |                                |    |   | 1      |   |   |       |   |   |       |        | 0     | 0               | 1               | 0     | 0.37390        |       | KI-93 only |  |
| sp O31125 S39A7_MOUSE  | Zinc transporter SLC39A7                        | 37.63             |                                |    |   | 1      |   |   |       |   |   |       |        | 0     | 0               | 1               | 0     | 0.37390        |       | KI-93 only |  |
| sp O9C000 TM261_MOUSE  | Transmembrane protein 261                       | 37.04             |                                |    |   | 1      |   |   |       |   |   |       |        | 0     | 0               | 1               | 0     | 0.37390        |       | KI-93 only |  |
| sp O9XV0 PCSK1_MOUSE   | ProSAA5                                         | 36.66             |                                |    |   | 1      |   |   |       |   |   |       |        | 0     | 0               | 1               | 0     | 0.37390        |       | KI-93 only |  |
| sp O9C0X8 RT8_MOUSE    | RS ribosomal protein S36                        | 35.67             |                                |    |   | 1      |   |   |       |   |   |       |        | 0     | 0               | 1               | 0     | 0.37390        |       | KI-93 only |  |
| sp O9Z2U1 PRPF3_MOUSE  | U4/U6 small nuclear ribonucleoprotein Prp3      | 34.28             |                                |    |   | 1      |   |   |       |   |   |       |        | 0     | 0               | 1               | 0     | 0.37390        |       | KI-93 only |  |
| sp O8CCP0 NEMF_MOUSE   | Nuclear export mediator factor Nemf             | 33.26             |                                |    |   | 1      |   |   |       |   |   |       |        | 0     | 0               | 1               | 0     | 0.37390        |       | KI-93 only |  |
| sp O9D1H8 RM53_MOUSE   | 39S ribosomal protein L53                       | 32.84             |                                |    |   | 1      |   |   |       |   |   |       |        | 0     | 0               | 1               | 0     | 0.37390        |       | KI-93 only |  |
| sp P97467 AMD_MOUSE    | Peptidyl-glycine alpha-aminating monooxyg       | 32.82             |                                |    |   | 1      |   |   |       |   |   |       |        | 0     | 0               | 1               | 0     | 0.37390        |       | KI-93 only |  |
| sp O9WUN2 TBK1_MOUSE   | Serine/threonine-protein kinase TBK1            | 32.72             |                                |    |   | 1      |   |   |       |   |   |       |        | 0     | 0               | 1               | 0     | 0.37390        |       | KI-93 only |  |
| sp O9EPE9 AT131_MOUSE  | Manganese-transporting ATPase 13A1              | 32.42             |                                |    |   | 1      |   |   |       |   |   |       |        | 0     | 0               | 1               | 0     | 0.37390        |       | KI-93 only |  |
| sp O81337 BAD_MOUSE    | Bd2-associated agonist of cell death            | 31.86             |                                |    |   | 1      |   |   |       |   |   |       |        | 0     | 0               | 1               | 0     | 0.37390        |       | KI-93 only |  |
| sp O9B8WM PCE2_MOUSE   | Prostaglandin G synthase 2                      | 31.59             |                                |    |   | 1      |   |   |       |   |   |       |        | 0     | 0               | 1               | 0     | 0.37390        |       | KI-93 only |  |
| sp E9K079 E9K079_MOUSE | Protein Dna11                                   | 31.44             |                                |    |   | 1      |   |   |       |   |   |       |        | 0     | 0               | 1               | 0     | 0.37390        |       | KI-93 only |  |
| sp O9C7K6 PCYXL_MOUSE  | Prenylcysteine oxidase-like                     | 201.14            |                                |    |   | 1      |   |   |       |   |   |       |        | 0     | 0               | 1               | 0     | 0.37390        |       | KI-93 only |  |
| sp O91YH5 ATL3_MOUSE   | Atlastin-3                                      | 106.88            |                                |    |   | 1      |   |   |       |   |   |       |        | 0     | 0               | 1               | 0     | 0.37390        |       | KI-93 only |  |
| sp O9P2B1 TNP03_MOUSE  | Transferrin-3                                   | 211.94            |                                |    |   | 1      |   |   |       |   |   |       |        | 0     | 0               | 1               | 0     | 0.37390        |       | KI-93 only |  |
| sp O9VH45 MARK1_MOUSE  | Serine/threonine-protein kinase MARK1           | 247.76            |                                |    |   | 1      |   |   |       |   |   |       |        | 0     | 0               | 1               | 0     | 0.37390        |       | KI-93 only |  |
| sp O9DFW4 NOP58_MOUSE  | Nucleolar protein 58                            | 267.84            |                                |    |   | 1      |   |   |       |   |   |       |        | 0     | 0               | 1               | 0     | 0.37390        |       | KI-93 only |  |
| sp O9VED9 LEGL_MOUSE   | Galectin-related protein                        | 83.26             |                                |    |   | 1      |   |   |       |   |   |       |        | 0     | 0               | 1               | 0     | 0.37390        |       | KI-93 only |  |
| sp O9C2B0 C60_MOUSE    | Succinate dehydrogenase cytochrome b56i         | 81.93             |                                |    |   | 1      |   |   |       |   |   |       |        | 0     | 0               | 1               | 0     | 0.37390        |       | KI-93 only |  |
| sp O9BLV3 SLA7_MOUSE   | Sodium/hydrogen exchanger 7                     | 80.5              |                                |    |   | 1      |   |   |       |   |   |       |        | 0     | 0               | 1               | 0     | 0.37390        |       | KI-93 only |  |
| sp O9WUKZ T18_MOUSE    | Zinc finger and BTB domain-containing prot      | 44.37             |                                |    |   | 1      |   |   |       |   |   |       |        | 0     | 0               | 1               | 0     | 0.37390        |       | KI-93 only |  |
| sp O9B2A9 TIGAR_MOUSE  | Fructose-2,6-bisphosphatase TIGAR               | 178.28            |                                |    |   | 1      |   |   |       |   |   |       |        | 0     | 0               | 1               | 0     | 0.37390        |       | KI-93 only |  |
| sp O9OX51 PLEC_MOUSE   | Plectin                                         | 151.81            |                                |    |   | 1      |   |   |       |   |   |       |        | 0     | 0               | 1               | 0     | 0.37390        |       | KI-93 only |  |
| sp O9N5W3 SPKAP_MOUSE  | A-kinase anchor protein SPKAP                   | 258.58            |                                |    |   | 1      |   |   |       |   |   |       |        | 0     | 0               | 1               | 0     | 0.37390        |       | KI-93 only |  |
| sp O9R0C3 TME2_MOUSE   | Transmembrane emp24 domain-containing pr        | 59.01             |                                |    |   | 1      |   |   |       |   |   |       |        | 0     | 0               | 1               | 0     | 0.37390        |       | KI-93 only |  |
| sp O91W00 SETD3_MOUSE  | Histone-lysine N-methyltransferase setd3        | 90.35             |                                |    |   | 1      |   |   |       |   |   |       |        | 0     | 0               | 1               | 0     | 0.37390        |       | KI-93 only |  |
| sp O35435 PYRD_MOUSE   | Dihydroorotate dehydrogenase (quinone)          | 93.38             |                                |    |   | 1      |   |   |       |   |   |       |        | 0     | 0               | 1               | 0     | 0.37390        |       | KI-93 only |  |
| sp O9C085 TM22_MOUSE   | Mitochondrial import inner membrane transp      | 112               |                                |    |   | 1      |   |   |       |   |   |       |        | 0     | 0               | 1               | 0     | 0.37390        |       | KI-93 only |  |
| sp O81016 CBG7_MOUSE   | Guanine nucleotide-binding protein (G)beta      | 54.32             |                                |    |   | 2      |   |   |       |   |   |       |        | 0     | 0               | 1               | 0     | 0.37390        |       | KI-93 only |  |
| sp O9Z2Z8 CL6A_MOUSE   | Actin-like protein 6A                           | 122.41            |                                |    |   | 1      |   | 1 |       |   |   |       |        | 0     | 0               | 1               | 0     | 0.11624        |       | KI-93 only |  |
| sp O9WUT3 K56A2_MOUSE  | Ribosomal protein S6 kinase alpha-2             | 75.64             |                                |    |   | 1      |   |   |       |   |   |       |        | 0     | 0               | 1               | 0     | 0.37390        |       | KI-93 only |  |
| sp O91V09 IPYR2_MOUSE  | Inorganic pyrophosphatase 2                     | 83.89             |                                |    |   | 1      |   |   |       |   |   |       |        | 0     | 0               | 1               | 0     | 0.37390        |       | KI-93 only |  |
| sp O9C0D5 ETU1_MOUSE   | Elongation factor Tu GTP-binding domain-c       | 86.18             |                                |    |   | 1      |   |   |       |   |   |       |        | 0     | 0               | 1               | 0     | 0.37390        |       | KI-93 only |  |
| sp O9CFE4 SCY12_MOUSE  | SCY1-like protein 2                             | 77.74             |                                |    |   | 1      |   |   |       |   |   |       |        | 0     | 0               | 1               | 0     | 0.37390        |       | KI-93 only |  |
| sp O3U898 MYOV2_MOUSE  | Myeloma-overexpressed gene 2 protein hor        | 71.25             |                                |    |   | 1      |   |   |       |   |   |       |        | 0     | 0               | 1               | 0     | 0.37390        |       | KI-93 only |  |
| sp O90967 PAPS1_MOUSE  | Bifunctional 3'-phosphoadenosine 5'-phosp       | 61.7              |                                | </ |   |        |   |   |       |   |   |       |        |       |                 |                 |       |                |       |            |  |





| accession              | description                                                                   | protein_set_score | 1 | 2 | 3 | 1 | 2 | 3 | 1 | 2 | 3 | 1 | 2 | 3 | WT | Ki-93 | Ki-92 | pvalue  | ratio | pvalue  | ratio | pvalue  | ratio |
|------------------------|-------------------------------------------------------------------------------|-------------------|---|---|---|---|---|---|---|---|---|---|---|---|----|-------|-------|---------|-------|---------|-------|---------|-------|
| trjQ3UAS3/G3UAS3_MOUSE | Putative uncharacterized protein OS=Mus m                                     | 781.64            | 1 | 4 | 1 | 3 | 4 | 4 | 5 | 3 | 4 | 8 | 3 | 2 | 3  | 3     | 3     | 0.19235 | 1.83  | 0.09663 | 2.00  | 0.23221 | 2.17  |
| sp Q02819 NUC1_MOUSE   | Nucleobindin-1 OS=Mus musculus (Mouse)                                        | 347.2             | 1 | 2 | 1 | 3 | 2 | 1 | 3 | 3 | 3 | 3 | 3 | 4 | 3  | 3     | 3     | 0.41806 | 1.50  | 0.06061 | 2.25  | 0.01969 | 2.50  |
| sp Q08B11 PRUNE_MOUSE  | Prune OS=Mus musculus (Mouse)                                                 | 746.56            | 1 | 2 | 1 | 1 | 1 | 3 | 1 | 1 | 1 | 2 | 3 | 2 | 1  | 2     | 3     | 0.22223 | 2.37  | 0.05223 | 2.00  | 0.05223 | 2.50  |
| sp P81021 RAB5B_MOUSE  | Ras-related protein Rab-5B OS=Mus musculus (Mouse)                            | 738.82            | 1 | 1 | 1 | 1 | 3 | 2 | 6 | 3 | 2 | 3 | 5 | 3 | 3  | 3     | 3     | 0.70674 | 0.80  | 0.27792 | 2.00  | 0.17769 | 2.00  |
| sp Q0D1K2 VATF_MOUSE   | V-type proton ATPase subunit F OS=Mus musculus (Mouse)                        | 262.28            | 1 | 1 | 1 | 1 | 3 | 1 | 3 | 2 | 1 | 3 | 2 | 1 | 3  | 3     | 3     | 0.39107 | 1.67  | 0.10538 | 2.00  | 0.08612 | 2.00  |
| sp Q09247 IMPI_MOUSE   | Mannose-6-phosphate isomerase OS=Mus musculus (Mouse)                         | 431.28            | 1 | 1 | 1 | 1 | 2 | 2 | 1 | 2 | 1 | 2 | 2 | 2 | 2  | 3     | 3     | 0.65202 | 1.50  | 0.07888 | 2.50  | 0.37128 | 2.00  |
| sp Q2L41 BZV2_MOUSE    | Basic leucine zipper and WZ domain-containing protein OS=Mus musculus (Mouse) | 307.81            | 1 | 1 | 1 | 1 | 2 | 2 | 3 | 2 | 1 | 1 | 2 | 2 | 2  | 2     | 2     | 0.68781 | 1.50  | 0.34853 | 2.50  | 0.12430 | 2.00  |
| sp Q0LM14 NTSC_MOUSE   | Nucleoside triphosphatase OS=Mus musculus (Mouse)                             | 133.86            | 1 | 1 | 1 | 1 | 1 | 1 | 1 | 1 | 1 | 1 | 1 | 1 | 1  | 1     | 1     | 0.46474 | 2.00  | 0.04647 | 2.00  | 0.04647 | 2.00  |
| sp Q0P4T2 UOS2_MOUSE   | U5 small nuclear ribonucleoprotein 200 kDa OS=Mus musculus (Mouse)            | 729.79            | 1 | 1 | 1 | 1 | 1 | 1 | 1 | 1 | 1 | 1 | 2 | 2 | 1  | 3     | 3     | 0.99759 | 1.00  | 0.10121 | 3.00  | 0.05091 | 5.00  |
| sp I47955 RLA1_MOUSE   | 60S acidic ribosomal protein P1 OS=Mus musculus (Mouse)                       | 124.65            | 1 | 1 | 1 | 1 | 1 | 1 | 1 | 1 | 1 | 1 | 1 | 1 | 1  | 1     | 1     | 0.99759 | 1.00  | 0.50267 | 2.00  | 0.08013 | 3.00  |
| sp Q0K019 BCLF1_MOUSE  | Bcl-2-associated transcription factor 1 OS=Mus musculus (Mouse)               | 173.04            | 1 | 1 | 1 | 1 | 1 | 1 | 2 | 1 | 1 | 1 | 1 | 1 | 1  | 1     | 2     | 0.94510 | 1.00  | 0.35515 | 3.00  | 0.46591 | 2.00  |
| sp Q0C035 BZV1_MOUSE   | Basic leucine zipper and WZ domain-containing protein OS=Mus musculus (Mouse) | 394.28            | 1 | 1 | 1 | 1 | 1 | 1 | 1 | 1 | 1 | 1 | 1 | 1 | 1  | 1     | 2     | 0.94510 | 1.00  | 0.52166 | 2.00  | 0.44226 | 2.00  |
| sp Q0T202 MT1_MOUSE    | Metallothionein-1 OS=Mus musculus (Mouse)                                     | 146.28            | 1 | 1 | 1 | 1 | 1 | 2 | 1 | 1 | 1 | 1 | 2 | 2 | 3  | 3     | 3     | 0.43345 | 1.50  | 0.16684 | 2.00  | 0.16221 | 2.00  |
| trjQ3U935/Q3U935_MOUSE | Putative uncharacterized protein OS=Mus musculus (Mouse)                      | 334.95            | 1 | 1 | 1 | 1 | 1 | 1 | 1 | 1 | 1 | 1 | 1 | 1 | 1  | 1     | 2     | 0.97304 | 1.00  | 0.68457 | 2.00  | 0.48226 | 2.00  |
| sp Q0H9W8 IGL05_MOUSE  | IgLN family member 5 OS=Mus musculus (Mouse)                                  | 180.88            | 1 | 1 | 1 | 1 | 1 | 1 | 2 | 2 | 1 | 1 | 1 | 2 | 1  | 1     | 2     | 0.96951 | 1.00  | 0.88457 | 2.00  | 0.13680 | 3.00  |
| sp Q0I0A7 DDX42_MOUSE  | ATP-dependent RNA helicase DDX42 OS=Mus musculus (Mouse)                      | 277.59            | 1 | 1 | 1 | 1 | 1 | 2 | 1 | 1 | 1 | 2 | 1 | 1 | 1  | 2     | 2     | 0.99676 | 1.00  | 0.86564 | 3.00  | 0.39668 | 3.00  |
| sp Q0K821 NM1L_MOUSE   | Nm1-like family domain-containing protein OS=Mus musculus (Mouse)             | 125.41            | 1 | 1 | 1 | 1 | 1 | 1 | 2 | 1 | 1 | 1 | 1 | 1 | 1  | 1     | 1     | 0.58441 | 2.00  | 0.47370 | 2.00  | 0.47370 | 2.00  |

Proteins mostly identified in the KI-scr sample with ratio>2:

| accession                    | description                                                                 | protein_set_score | Exp. from 01/02/2017 |   |   |       |    |    |       |   |   |       |   |   | # Repl. | Exp. 01/02/2017 |                |                |                |             |         |        |         |      |
|------------------------------|-----------------------------------------------------------------------------|-------------------|----------------------|---|---|-------|----|----|-------|---|---|-------|---|---|---------|-----------------|----------------|----------------|----------------|-------------|---------|--------|---------|------|
|                              |                                                                             |                   | WT                   |   |   | Ki-93 |    |    | Ki-92 |   |   | Ki-93 |   |   |         | Ki-93 / WT-scr  | Ki-92 / WT-scr | Ki-93 / WT-scr | Ki-92 / WT-scr |             |         |        |         |      |
| 1                            | 2                                                                           | 3                 | 1                    | 2 | 3 | 1     | 2  | 3  | 1     | 2 | 3 | 1     | 2 | 3 | WT      | Ki-93           | Ki-92          | pvalue         | ratio          | pvalue      | ratio   | pvalue | ratio   |      |
| sp P05132 KAPCA_MOUSE        | CAMP-dependent protein kinase catalytic subunit OS=Mus musculus (Mouse)     | 1235.28           | 6                    | 6 | 4 | 10    | 12 | 11 | 12    | 2 | 4 | 10    | 2 | 2 | 3       | 3               | 3              | 3              | 0.00132        | 2.06        | 0.81905 | 1.13   | 0.8718  | 0.88 |
| sp P24270 CATA_MOUSE         | Catalase OS=Mus musculus (Mouse) GN=C                                       | 915.52            | 6                    | 3 | 5 | 10    | 8  | 14 | 10    | 3 | 5 | 11    | 6 | 6 | 3       | 3               | 3              | 3              | 0.04811        | 2.29        | 0.51838 | 1.29   | 0.07027 | 1.64 |
| sp P99026 PSB4_MOUSE         | Proteasome subunit beta type-4 OS=Mus musculus (Mouse)                      | 536.16            | 5                    | 3 | 3 | 6     | 9  | 8  | 9     | 3 | 7 | 8     | 3 | 6 | 3       | 3               | 3              | 3              | 0.01786        | 2.09        | 0.17220 | 1.73   | 0.15307 | 1.55 |
| sp P26043 RAD1_MOUSE         | Radixin OS=Mus musculus (Mouse) GN=R                                        | 754.21            | 2                    | 3 | 4 | 6     | 6  | 6  | 7     | 1 | 3 | 5     | 4 | 3 | 3       | 3               | 3              | 3              | 0.01299        | 2.00        | 0.17371 | 1.22   | 0.12673 | 1.33 |
| sp Q0Z144 F3_MOUSE           | Radix enhancer-binding protein 3 OS=Mus musculus (Mouse)                    | 620.57            | 2                    | 2 | 1 | 3     | 4  | 3  | 3     | 4 | 2 | 4     | 2 | 3 | 3       | 3               | 3              | 3              | 0.26328        | 2.00        | 0.06607 | 2.00   | 0.12625 | 1.25 |
| trjB1AWE0 B1AWE0_MOUSE       | Claudin light chain A OS=Mus musculus (Mouse)                               | 529.43            | 3                    | 3 | 3 | 8     | 6  | 4  | 4     | 4 | 1 | 4     | 3 | 2 | 3       | 3               | 3              | 3              | 0.02920        | 2.00        | 0.90038 | 1.00   | 0.52327 | 1.00 |
| sp Q01V7R MLP3A_MOUSE        | Microtubule-associated proteins 1A/1B light chain 3 OS=Mus musculus (Mouse) | 305.94            | 2                    | 3 | 3 | 4     | 6  | 6  | 3     | 2 | 5 | 5     | 1 | 4 | 3       | 3               | 3              | 3              | 0.01689        | 2.00        | 0.45354 | 1.25   | 0.47642 | 1.25 |
| sp Q0BWT1 THM_MOUSE          | 3-ketoadipyl-CoA thiolase, mitochondrial OS=Mus musculus (Mouse)            | 1089.63           | 3                    | 2 | 5 | 5     | 10 | 5  | 7     | 5 | 4 | 5     | 8 | 6 | 3       | 3               | 3              | 3              | 0.15926        | 2.00        | 0.12798 | 1.60   | 0.08200 | 1.90 |
| sp Q0V5H5 EMIP_MOUSE         | EMIP2-interacting protein OS=Mus musculus (Mouse)                           | 713.91            | 2                    | 2 | 3 | 5     | 6  | 3  | 3     | 4 | 2 | 4     | 2 | 3 | 3       | 3               | 3              | 3              | 0.37390        | WT-scr only | 0.53454 | 2.50   | 0.05897 | 3.50 |
| sp P23931 FRIL1_MOUSE        | Feritin light chain 1 OS=Mus musculus (Mouse)                               | 467.27            | 4                    | 4 | 1 | 4     | 4  | 10 | 8     | 2 | 5 | 5     | 1 | 3 | 3       | 3               | 3              | 3              | 0.26366        | 2.00        | 0.30556 | 1.67   | 0.85535 | 1.00 |
| sp Q09K22 NEUA_MOUSE         | N-acetylneuraminate cytidylyltransferase OS=Mus musculus (Mouse)            | 281.81            | 2                    | 3 | 1 | 3     | 4  | 6  | 3     | 2 | 2 | 5     | 4 | 3 | 3       | 3               | 3              | 2              | 0.08997        | 2.17        | 0.40700 | 1.17   | 0.50198 | 1.50 |
| sp Q0FR41 GNS_MOUSE          | N-acetylneuraminate-6-sulfatase OS=Mus musculus (Mouse)                     | 201.79            | 2                    | 3 | 1 | 4     | 3  | 5  | 2     | 2 | 3 | 3     | 2 | 3 | 3       | 3               | 3              | 3              | 0.03073        | 2.40        | 0.18911 | 1.40   | 0.03883 | 1.60 |
| sp Q0C071 AMPL_MOUSE         | Cytosol aminopeptidase OS=Mus musculus (Mouse)                              | 432.04            | 2                    | 2 | 1 | 3     | 4  | 4  | 3     | 1 | 2 | 2     | 1 | 1 | 3       | 3               | 3              | 3              | 0.00921        | 2.00        | 0.64337 | 1.00   | 0.66877 | 0.80 |
| sp Q0D005 GNAS_MOUSE         | RAD1 dephosphorylation inhibitor 1 OS=Mus musculus (Mouse)                  | 395.53            | 2                    | 2 | 1 | 1     | 5  | 4  | 3     | 1 | 2 | 1     | 3 | 2 | 3       | 3               | 3              | 3              | 0.62503        | 0.80        | 0.62503 | 0.80   | 0.16689 | 1.40 |
| sp P30681 HMGB2_MOUSE        | High mobility group protein B2 OS=Mus musculus (Mouse)                      | 398.21            | 5                    | 2 | 3 | 7     | 9  | 9  | 4     | 6 | 3 | 6     | 2 | 2 | 2       | 2               | 2              | 2              | 0.16740        | 2.71        | 0.62503 | 1.43   | 0.77088 | 0.71 |
| sp Q09JF8 PSP1_MOUSE         | PC4 and SFRS1-interacting protein OS=Mus musculus (Mouse)                   | 886.27            | 3                    | 3 | 3 | 3     | 4  | 6  | 7     | 1 | 1 | 4     | 1 | 1 | 2       | 3               | 3              | 3              | 0.16609        | 2.17        | 0.80039 | 1.33   | 0.91073 | 1.00 |
| sp Q0D106 EERP44_MOUSE       | Endoplasmic reticulum resident protein 44 OS=Mus musculus (Mouse)           | 450.38            | 3                    | 2 | 3 | 3     | 5  | 6  | 5     | 1 | 2 | 2     | 3 | 3 | 3       | 3               | 3              | 3              | 0.07689        | 2.80        | 0.49983 | 1.60   | 0.24052 | 1.60 |
| trjA0A0N5W5 A0A0N5W5_MOUSE   | N-acetylneuraminate cytidylyltransferase OS=Mus musculus (Mouse)            | 98.03             | 2                    | 2 | 3 | 3     | 3  | 3  | 3     | 2 | 1 | 4     | 2 | 2 | 2       | 2               | 2              | 2              | 0.07963        | 2.25        | 0.41635 | 1.50   | 0.57922 | 1.50 |
| trjA0A0N5WC3 A0A0N5WC3_MOUSE | N-acetylneuraminate cytidylyltransferase OS=Mus musculus (Mouse)            | 98.03             | 2                    | 2 | 3 | 3     | 3  | 3  | 3     | 2 | 1 | 4     | 2 | 2 | 2       | 2               | 2              | 2              | 0.07963        | 2.25        | 0.41635 | 1.50   | 0.57922 | 1.50 |
| sp Q0ZVW6 IF2A_MOUSE         | Eukaryotic translation initiation factor 2 subunit OS=Mus musculus (Mouse)  | 738.34            | 2                    | 2 | 2 | 4     | 5  | 2  | 3     | 2 | 1 | 2     | 2 | 2 | 2       | 3               | 3              | 3              | 0.10592        | 2.75        | 0.58977 | 1.25   | 0.49505 | 1.25 |
| sp P97820 M4K4_MOUSE         | Mtogen-activated protein kinase kinase kinase OS=Mus musculus (Mouse)       | 539.88            | 2                    | 1 | 3 | 3     | 6  | 3  | 3     | 1 | 2 | 4     | 2 | 2 | 3       | 3               | 3              | 3              | 0.16827        | 2.00        | 0.96981 | 1.00   | 0.18683 | 1.33 |
| sp Q0JME2 MMN1_MOUSE         | Mitogen-activated protein kinase 5 OS=Mus musculus (Mouse)                  | 658.48            | 2                    | 1 | 3 | 5     | 4  | 3  | 3     | 1 | 2 | 5     | 2 | 2 | 2       | 3               | 3              | 3              | 0.12320        | 2.00        | 0.86981 | 1.00   | 0.30029 | 1.50 |
| sp Q0BLV1 PSMD5_MOUSE        | 26S proteasome non-ATPase regulatory subunit OS=Mus musculus (Mouse)        | 600.74            | 2                    | 1 | 2 | 2     | 2  | 3  | 3     | 2 | 2 | 4     | 1 | 2 | 2       | 2               | 2              | 2              | 0.43039        | 2.00        | 0.53408 | 1.67   | 0.60061 | 1.67 |
| sp Q07035 ATX2_MOUSE         | Ataxin-2 OS=Mus musculus (Mouse) GN=A                                       | 520.43            | 2                    | 1 | 1 | 2     | 3  | 2  | 2     | 1 | 1 | 1     | 2 | 2 | 2       | 3               | 1              | 2              | 0.31005        | 2.00        | 0.69382 | 0.67   | 0.86894 | 1.00 |
| sp Q09JY8 LPP3_MOUSE         | Lipid phosphate phosphohydrolase 3 OS=Mus musculus (Mouse)                  | 288.01            | 2                    | 1 | 1 | 1     | 4  | 2  | 2     | 1 | 2 | 2     | 2 | 2 | 2       | 2               | 2              | 2              | 0.28706        | 2.33        | 0.97943 | 1.00   | 0.72684 | 0.67 |
| sp Q0JK48 SHL1_MOUSE         | Endophilin-B1 OS=Mus musculus (Mouse)                                       | 459.95            | 1                    | 2 | 1 | 1     | 2  | 5  | 2     | 2 | 2 | 2     | 1 | 1 | 2       | 3               | 1              | 3              | 0.29559        | 2.67        | 0.73981 | 0.67   | 0.49632 | 1.33 |
| sp Q09J99 THM_MOUSE          | 3-mercaptopyruvate sulfurtransferase OS=Mus musculus (Mouse)                | 522.53            | 2                    | 2 | 2 | 3     | 4  | 1  | 2     | 2 | 1 | 3     | 1 | 2 | 2       | 2               | 2              | 2              | 0.32888        | 2.00        | 0.65952 | 1.50   | 0.19192 | 1.25 |
| sp P27545 CERS1_MOUSE        | Ceramide synthase 1 OS=Mus musculus (Mouse)                                 | 207.92            | 3                    | 1 | 3 | 3     | 2  | 2  | 2     | 2 | 1 | 3     | 2 | 2 | 2       | 3               | 2              | 2              | 0.27835        | 2.00        | 0.69501 | 1.25   | 0.73387 | 1.25 |
| sp Q08759 UB3A_MOUSE         | Ubiquitin-protein ligase E3A OS=Mus musculus (Mouse)                        | 394.52            | 2                    | 1 | 1 | 2     | 1  | 3  | 2     | 1 | 2 | 1     | 2 | 1 | 1       | 1               | 1              | 1              | 0.46624        | 2.00        | 0.72795 | 1.50   | 0.68821 | 1.50 |
| sp Q01V64 ISOC1_MOUSE        | Isocitrate dehydrogenase domain-containing protein OS=Mus musculus (Mouse)  | 330.11            | 1                    | 3 | 3 | 6     | 4  | 3  | 4     | 2 | 2 | 6     | 3 | 2 | 2       | 2               | 2              | 2              | 0.62029        | 2.00        | 0.95504 | 1.00   | 0.61012 | 1.50 |
| sp Q0D855 CQRT_MOUSE         | Cytochrome b-c1 complex subunit 7 OS=Mus musculus (Mouse)                   | 542.26            | 1                    | 4 | 5 | 4     | 11 | 9  | 4     | 2 | 2 | 6     | 3 | 6 | 3       | 3               | 3              | 3              | 0.05965        | 2.14        | 0.64337 | 1.14   | 0.67312 | 1.29 |
| sp P70189 MB1_MOUSE          | Myosin subunit beta-1 OS=Mus musculus (Mouse)                               | 1329.1            | 1                    | 3 | 1 | 3     | 3  | 4  | 10    | 3 | 4 | 6     | 3 | 6 | 3       | 3               | 3              | 3              | 0.12581        | 2.40        | 0.69174 | 1.40   |         |      |



Proteins mostly identified in the WT-scr sample with ratio>2:

| accession              | description                                  | protein_set_score | Exp. from 01/02/2017 |   |   |   |        |   |   |   |       |   |   |   | # Repl. | Exp. 01/02/2017 |        |                |         |             |             |             |             |             |      |
|------------------------|----------------------------------------------|-------------------|----------------------|---|---|---|--------|---|---|---|-------|---|---|---|---------|-----------------|--------|----------------|---------|-------------|-------------|-------------|-------------|-------------|------|
|                        |                                              |                   | WT                   |   |   |   | K1-scr |   |   |   | K1-93 |   |   |   |         | K1-scr / WT-scr |        | K1-93 / WT-scr |         |             |             |             |             |             |      |
|                        |                                              |                   | 1                    | 2 | 3 | 1 | 2      | 3 | 1 | 2 | 3     | 1 | 2 | 3 |         | WT              | K1-scr | ratio          | WT      | K1-93       | ratio       | WT          | K1-93       | ratio       |      |
| sp Q15841 FXR1_MOUSE   | Fragile X mental retardation syndrome-relat  | 385.27            | 4                    | 5 | 4 | 2 | 2      | 2 | 2 | 1 | 2     | 3 | 2 | 1 | 3       | 3               | 3      | 2              | 0.0008  | 0.46        | 0.03085     | 0.46        | 0.00670     | 0.23        |      |
| sp Q8BIE6 FRMA_MOUSE   | FERM domain-containing protein 4A OS=M       | 428.9             | 2                    | 3 | 3 | 3 | 1      | 2 | 1 | 2 | 1     | 1 | 1 | 1 | 1       | 3               | 2      | 3              | 2       | 0.23025     | 0.50        | 0.03679     | 0.50        | 0.01711     | 0.25 |
| sp Q92254 PDE2A_MOUSE  | cGMP-dependent 3',5'-cyclic phosphodiester   | 988.71            | 4                    | 3 | 3 | 3 | 1      | 3 | 1 | 3 | 1     | 3 | 2 | 3 | 2       | 2               | 2      | 2              | 0.10475 | 0.40        | 0.08785     | 0.40        | 0.19818     | 0.50        |      |
| sp Q0KL02 TRIO_MOUSE   | Triple functional domain protein OS=Musc     | 908.7             | 2                    | 4 | 2 | 2 | 1      | 1 | 1 | 1 | 2     | 1 | 1 | 1 | 1       | 3               | 2      | 1              | 0.10490 | 0.38        | 0.03216     | 0.38        | 0.14884     | 0.50        |      |
| sp P61937 NFK2_MOUSE   | Nuclear factor-kappa-B protein 2 OS=Muscu    | 192.49            | 3                    | 3 | 2 | 2 | 2      | 2 | 2 | 1 | 2     | 2 | 2 | 2 | 2       | 1               | 1      | 1              | 0.13305 | 0.50        | 0.03390     | 0.50        | 0.05177     | 0.25        |      |
| sp P35922 FMR1_MOUSE   | Fragile X mental retardation protein 1 homo  | 352.01            | 5                    | 3 | 2 | 1 | 2      | 1 | 1 | 1 | 1     | 1 | 1 | 1 | 1       | 3               | 3      | 1              | 0.09150 | 0.40        | 0.03673     | 0.40        | 0.05527     | 0.20        |      |
| tr A2AJ7 A2AJ7_MOUSE   | MC6130458 OS=Mus musculus (Mouse) G          | 328.13            | 3                    | 3 | 1 | 2 | 1      | 1 | 1 | 1 | 1     | 1 | 1 | 1 | 1       | 3               | 1      | 3              | 2       | 0.15360     | 0.29        | 0.12395     | 0.29        | 0.11812     | 0.29 |
| sp Q0AK09 PHF14_MOUSE  | 14 kDa phosphohistidine phosphatase OS       | 347.93            | 2                    | 3 | 1 | 1 | 1      | 1 | 1 | 1 | 1     | 2 | 1 | 2 | 1       | 1               | 1      | 1              | 0.09923 | 0.33        | 0.06798     | 0.33        | 0.19755     | 0.33        |      |
| sp Q0C996 TM163_MOUSE  | Transmembrane protein 163 OS=Mus muscu       | 136.74            | 2                    | 2 | 1 | 1 | 1      | 1 | 1 | 1 | 1     | 1 | 1 | 1 | 1       | 2               | 1      | 1              | 0.25703 | 0.25        | 0.04527     | 0.25        | 0.25286     | 0.25        |      |
| sp Q0L456 QDE1_MOUSE   | Cyclic-nucleoside diphosphate phosphodiester | 167.97            | 3                    | 1 | 2 | 1 | 2      | 1 | 1 | 1 | 1     | 1 | 1 | 1 | 1       | 3               | 2      | 1              | 0.24833 | 0.50        | 0.07761     | 0.37        | 0.09191     | 0.17        |      |
| sp B9EJA2 CTTB2_MOUSE  | Corticactin-binding protein 2 OS=Mus muscu   | 402.27            | 2                    | 1 | 1 | 1 | 1      | 1 | 1 | 1 | 1     | 1 | 1 | 1 | 1       | 3               | 2      | 1              | 0.21150 | 0.50        | 0.09239     | 0.25        | 0.10176     | 0.25        |      |
| sp P63248 PKA_MOUSE    | cAMP-dependent protein kinase inhibitor al   | 143.27            | 2                    | 1 | 1 | 1 | 1      | 1 | 1 | 1 | 1     | 1 | 1 | 1 | 1       | 3               | 2      | 2              | 0.22060 | 0.50        | 0.24653     | 0.50        | 0.10176     | 0.25        |      |
| sp Q0R5H1 UBP15_MOUSE  | Ubiquitin carboxyl-terminal hydrolase 15 OS  | 83.16             | 2                    | 1 | 1 | 1 | 1      | 1 | 1 | 1 | 1     | 1 | 1 | 1 | 1       | 1               | 0      | 0              | 0.38533 | 0.33        | 0.16333     | 0.33        | 0.16333     | 0.33        |      |
| sp Q0Q272 GPC1_MOUSE   | Colicoid domain-containing protein 177 C     | 155.85            | 2                    | 1 | 1 | 1 | 1      | 1 | 1 | 1 | 1     | 1 | 1 | 1 | 1       | 1               | 1      | 1              | 0.35241 | 0.33        | 0.26361     | 0.33        | 0.46129     | 0.50        |      |
| sp Q0Z218 SUCB2_MOUSE  | Succinyl-CoA ligase [GDP-forming] subunit 1  | 122.85            | 2                    | 1 | 1 | 1 | 1      | 1 | 1 | 1 | 1     | 1 | 1 | 1 | 1       | 1               | 1      | 0              | 0.67949 | 0.50        | 0.65549     | 0.50        | 0.37990     | WT-scr only |      |
| sp Q0CC85 PABP2_MOUSE  | Polyadenylate-binding protein 2 OS=Mus m     | 171.28            | 2                    | 1 | 1 | 1 | 1      | 1 | 1 | 1 | 1     | 1 | 1 | 1 | 1       | 1               | 1      | 1              | 0.67949 | 0.50        | 0.72317     | 0.50        | 0.75820     | 0.50        |      |
| sp Q3UJH6 WNK2_MOUSE   | Serine/threonine-protein kinase WNK2 OS=     | 114.95            | 2                    | 1 | 1 | 1 | 1      | 1 | 1 | 1 | 1     | 1 | 1 | 1 | 1       | 1               | 1      | 1              | 0.64280 | 0.50        | 0.72317     | 0.50        | 0.37990     | WT-scr only |      |
| sp Q0JKN6 NOVA1_MOUSE  | RNA-binding protein Nova-1 OS=Mus muscu      | 174.86            | 2                    | 1 | 1 | 1 | 1      | 1 | 1 | 1 | 1     | 1 | 1 | 1 | 1       | 1               | 1      | 1              | 0.64280 | 0.50        | 0.37390     | WT-scr only | 0.73999     | 0.50        |      |
| sp Q0AKM3 OXRI_MOUSE   | Oxidation resistance protein 1 OS=Mus mu     | 240.26            | 2                    | 1 | 1 | 1 | 1      | 1 | 1 | 1 | 1     | 1 | 1 | 1 | 1       | 1               | 1      | 1              | 0.37390 | WT-scr only | 0.72317     | 0.50        | 0.37390     | WT-scr only |      |
| sp Q0H0A9 CNKR2_MOUSE  | Connector enhancer of kinase suppressor C    | 160.91            | 2                    | 1 | 1 | 1 | 1      | 1 | 1 | 1 | 1     | 1 | 1 | 1 | 1       | 1               | 1      | 1              | 0       | 0.37390     | WT-scr only | 0.37390     | WT-scr only | 0.62723     | 0.50 |
| sp Q01VE0 S274_MOUSE   | Long-chain fatty acid transport protein 4 C  | 452.26            | 1                    | 3 | 5 | 3 | 1      | 1 | 1 | 1 | 1     | 1 | 1 | 1 | 1       | 3               | 2      | 1              | 0.27070 | 0.33        | 0.23817     | 0.33        | 0.19096     | 0.11        |      |
| sp Q092X9 NLGN2_MOUSE  | Neurexin-2 OS=Mus musculus (Mouse) G         | 305.09            | 1                    | 2 | 2 | 1 | 1      | 1 | 1 | 1 | 1     | 1 | 1 | 1 | 1       | 3               | 2      | 0              | 0.08162 | 0.40        | 0.00731     | WT-scr only | 0.00731     | WT-scr only |      |
| sp Q3UJH6 CO177_MOUSE  | Coiled-coil domain-containing protein 177 C  | 119.53            | 1                    | 2 | 1 | 1 | 1      | 1 | 1 | 1 | 1     | 1 | 1 | 1 | 1       | 1               | 1      | 1              | 0.01192 | 0.33        | 0.01192     | 0.33        | 0.01192     | 0.33        |      |
| sp Q0C8D3 VCP1_MOUSE   | Deubiquitinating protein VCP1/315 OS=Mus     | 166.04            | 1                    | 2 | 1 | 1 | 1      | 1 | 1 | 1 | 1     | 1 | 1 | 1 | 1       | 2               | 1      | 0              | 0.38072 | 0.33        | 0.15344     | WT-scr only | 0.45970     | 0.33        |      |
| sp P63248 TBCD_MOUSE   | Tubulin-specific chaperone D OS=Mus mus      | 353.14            | 1                    | 2 | 1 | 1 | 1      | 1 | 1 | 1 | 1     | 1 | 1 | 1 | 1       | 2               | 0      | 1              | 0.15344 | WT-scr only | 0.35814     | 0.33        | 0.15344     | WT-scr only |      |
| tr P70245 EBP_MOUSE    | 3-beta-hydroxysteroid-Delta(8),Delta(7)stero | 47.77             | 1                    | 1 | 1 | 1 | 1      | 1 | 1 | 1 | 1     | 1 | 1 | 1 | 1       | 3               | 1      | 1              | 0.12156 | 0.33        | 0.09556     | 0.33        | 0.00000     | WT-scr only |      |
| sp Q0P610 SNR40_MOUSE  | US 53k nuclear ribonucleoprotein A0 4 kb; J  | 55.32             | 1                    | 1 | 1 | 1 | 1      | 1 | 1 | 1 | 1     | 1 | 1 | 1 | 1       | 1               | 1      | 1              | 0.53515 | 0.50        | 0.49429     | 0.50        | 0.11633     | WT-scr only |      |
| tr F59P89 PVP_MOUSE    | Protein Zc3h7b OS=Mus musculus (Mouse        | 55.32             | 1                    | 1 | 1 | 1 | 1      | 1 | 1 | 1 | 1     | 1 | 1 | 1 | 1       | 1               | 1      | 1              | 0.53515 | 0.50        | 0.49429     | 0.50        | 0.11633     | WT-scr only |      |
| sp Q11136 PEPD_MOUSE   | Xaa-Pro dipeptidase OS=Mus musculus (M       | 365.02            | 1                    | 1 | 1 | 1 | 1      | 1 | 1 | 1 | 1     | 1 | 1 | 1 | 1       | 1               | 1      | 1              | 0.53515 | 0.50        | 0.60884     | 0.50        | 0.66668     | 0.50        |      |
| sp Q0D7A8 ARMC1_MOUSE  | Armadillo repeat-containing protein 1 OS=    | 106.85            | 1                    | 1 | 1 | 1 | 1      | 1 | 1 | 1 | 1     | 1 | 1 | 1 | 1       | 1               | 1      | 1              | 0.53515 | 0.50        | 0.60884     | 0.50        | 0.66668     | 0.50        |      |
| tr F7C897 F7C89_MOUSE  | CAP-Gly domain-containing linker protein 1   | 201.92            | 1                    | 1 | 1 | 1 | 1      | 1 | 1 | 1 | 1     | 1 | 1 | 1 | 1       | 1               | 1      | 1              | 0.47270 | 0.50        | 0.49429     | 0.50        | 0.52635     | 0.50        |      |
| sp Q0SS3M RH44_MOUSE   | RhoGAP-activating protein 4 OS=Mus muscu     | 336.94            | 1                    | 1 | 1 | 1 | 1      | 1 | 1 | 1 | 1     | 1 | 1 | 1 | 1       | 1               | 1      | 1              | 0.47270 | 0.50        | 0.49429     | 0.50        | 0.52635     | 0.50        |      |
| sp Q09KN9 EPN4_MOUSE   | Clastrin interactor 1 OS=Mus musculus (M     | 164.74            | 1                    | 1 | 1 | 1 | 1      | 1 | 1 | 1 | 1     | 1 | 1 | 1 | 1       | 1               | 1      | 1              | 0.49655 | 0.50        | 0.11633     | WT-scr only | 0.11633     | WT-scr only |      |
| sp Q0F2E8 TAOK1_MOUSE  | Serine/threonine-protein kinase TAO1 OS=     | 69.25             | 1                    | 1 | 1 | 1 | 1      | 1 | 1 | 1 | 1     | 1 | 1 | 1 | 1       | 1               | 1      | 1              | 0.11633 | WT-scr only | 0.35219     | 0.33        | 0.06379     | 0.50        |      |
| sp Q0P9U7 INW02_MOUSE  | NACHT and WD repeat domain-containing p      | 154.86            | 1                    | 1 | 2 | 1 | 1      | 1 | 1 | 1 | 1     | 1 | 1 | 1 | 1       | 1               | 1      | 1              | 0.34148 | 0.33        | 0.16219     | 0.33        | 0.44622     | 0.33        |      |
| sp Q0B712 S4AT_MOUSE   | Sodium bicarbonate cotransporter 3 OS=M      | 55.15             | 1                    | 1 | 1 | 1 | 1      | 1 | 1 | 1 | 1     | 1 | 1 | 1 | 1       | 1               | 1      | 1              | 0.51472 | 0.50        | 0.58634     | 0.50        | 0.11616     | WT-scr only |      |
| sp Q09KX1 MLE2_MOUSE   | Myeloid leukemia factor 2 OS=Mus muscu       | 129.99            | 1                    | 1 | 1 | 1 | 1      | 1 | 1 | 1 | 1     | 1 | 1 | 1 | 1       | 1               | 1      | 1              | 0.51472 | 0.50        | 0.58634     | 0.50        | 0.11616     | WT-scr only |      |
| sp Q0P9B3 GALT2_MOUSE  | Sulfatase N-acetylgalactosaminyltransfer     | 84.93             | 1                    | 1 | 1 | 1 | 1      | 1 | 1 | 1 | 1     | 1 | 1 | 1 | 1       | 1               | 1      | 1              | 0.45451 | 0.50        | 0.47527     | 0.50        | 0.11616     | WT-scr only |      |
| sp Q0TEK5 VKORL_MOUSE  | Vitamin K epoxide reductase complex subu     | 106.69            | 1                    | 1 | 1 | 1 | 1      | 1 | 1 | 1 | 1     | 1 | 1 | 1 | 1       | 1               | 1      | 1              | 0.47466 | 0.50        | 0.56392     | 0.50        | 0.13637     | 0.50        |      |
| sp P52795 EFN1_MOUSE   | Ephrin-B1 OS=Mus musculus (Mouse) GN=        | 38.54             | 1                    | 2 | 2 | 2 | 1      | 1 | 1 | 1 | 1     | 1 | 1 | 1 | 1       | 2               | 0      | 1              | 0.11616 | WT-scr only | 0.11616     | WT-scr only | 0.64301     | 0.50        |      |
| sp Q09112 LANC1_MOUSE  | Lancin-1 OS=Mus musculus (Mouse) GN=         | 244.51            | 1                    | 2 | 2 | 2 | 1      | 1 | 1 | 1 | 1     | 1 | 1 | 1 | 1       | 1               | 1      | 1              | 0.24050 | 0.50        | 0.24050     | 0.50        | 0.48711     | 0.50        |      |
| sp Q02204 P5CR2_MOUSE  | Pyruvate-5-carboxylase reductase 2 OS=M      | 135.56            | 3                    | 1 | 2 | 1 | 2      | 1 | 1 | 1 | 1     | 1 | 1 | 1 | 1       | 1               | 1      | 1              | 0.59098 | 0.50        | 0.33338     | 0.25        | 0.38383     | 0.25        |      |
| sp P61087 UBE2K_MOUSE  | Ubiquitin-conjugating enzyme E2 K OS=M       | 319.64            | 2                    | 1 | 1 | 1 | 1      | 1 | 1 | 1 | 1     | 1 | 1 | 1 | 1       | 1               | 1      | 1              | 0.15120 | WT-scr only | 0.35349     | 0.33        | 0.36950     | 0.33        |      |
| tr D324C5 D324C5_MOUSE | Protein Ceif5 OS=Mus musculus (Mouse) C      | 123.27            | 1                    | 1 | 1 | 1 | 1      | 1 | 1 | 1 | 1     | 1 | 1 | 1 | 1       | 1               | 1      | 1              | 0.69646 | 0.50        | 0.37390     | WT-scr only | 0.37390     | WT-scr only |      |
| sp P52479 UBP10_MOUSE  | Ubiquitin carboxyl-terminal hydrolase 10 OS  | 189.71            | 1                    | 2 | 1 | 1 | 1      | 1 | 1 | 1 | 1     | 1 | 1 | 1 | 1       | 1               | 1      | 1              | 0.67090 | 0.50        | 0.37390     | WT-scr only | 0.77848     | 0.50        |      |
| sp Q03398 PDE1_MOUSE   | 3',5'-cyclic phosphodiesterase 1 OS=Mus      | 114.15            | 1                    | 1 | 1 | 1 | 1      | 1 | 1 | 1 | 1     | 1 | 1 | 1 | 1       | 1               | 1      | 1              | 0.37390 | WT-scr only | 0.47428     | 0.50        | 0.56585     | 0.50        |      |
| sp Q05483 CSK2_MOUSE   | Cas kinase II subunit alpha' OS=Mus mu       | 254.63            | 1                    | 1 | 1 | 1 | 1      | 1 | 1 | 1 | 1     | 1 | 1 | 1 | 1       | 1               | 1      | 1              | 0.52850 | 0.50        | 0.60146     | 0.50        | 0.11658     | WT-scr only |      |
| sp P62482 KCB2_MOUSE   | Voltage-gated potassium channel subunit b    | 144.26            | 1                    | 1 | 1 | 1 | 1      | 1 | 1 | 1 | 1     | 1 | 1 | 1 | 1       | 1               | 1      | 1              | 0.52850 | 0.50        | 0.57867     | 0.50        | 0.11658     | WT-scr only |      |
| sp Q02201 MARC2_MOUSE  | Mitochondrial amidoxime reductase compone    | 229.77            | 1                    | 1 | 1 | 1 | 1      | 1 | 1 | 1 | 1     | 1 | 1 | 1 | 1       | 1               | 1      | 1              | 0.52850 | 0.50        | 0.11658     | WT-scr only | 0.51712     | 0.50        |      |
| sp Q09079 CPE_MOUSE    | Cationic protein 1 OS=Mus musculus (Mou      | 253.82            | 1                    | 1 | 1 | 1 | 1      | 1 | 1 | 1 | 1     | 1 | 1 | 1 | 1       | 1               | 1      | 1              | 0.52850 | 0.50        | 0.57867     | 0.50        | 0.11658     | WT-scr only |      |
| sp Q04A48 UBP7_MOUSE   | Ubiquitin carboxyl-terminal hydrolase 7 OS=  | 493.04            | 1                    | 1 | 1 | 1 | 1      | 1 | 1 | 1 | 1     | 1 | 1 | 1 | 1       | 1               | 1      | 1              | 0.48750 | 0.50        | 0.11658     | WT-scr only | 0.51712     | 0.50        |      |
| sp Q04133 AOF4_MOUSE   | Amine oxidase (flavin-containing) A OS=M     | 328.41            | 1                    | 1 | 1 | 1 | 1      | 1 | 1 | 1 | 1     | 1 | 1 | 1 | 1       | 1               | 1      | 1              | 0.48750 | 0.50        | 0.11658     | WT-scr only | 0.11658     | WT-scr only |      |
| tr M0C9J9 M0C9J9_MOUSE | Protein Tmem78b OS=Mus musculus (Mo          | 64.67             | 1                    | 1 | 1 | 1 | 1      | 1 | 1 | 1 | 1     | 1 | 1 | 1 | 1       | 1               | 1      | 1              | 0.11658 | WT-scr only | 0.57867     | 0.50        | 0.11658     | WT-scr only |      |
| sp Q0L0K0 SED1_MOUSE   | SEC14 domain and spectrin repeat-contain     | 328.02            | 1                    | 1 | 1 | 1 | 1      | 1 | 1 | 1 | 1     | 1 | 1 | 1 | 1       | 1               | 1      | 1              | 0.11658 | WT-scr only | 0.57867     | 0.50        | 0.11658     | WT-scr only |      |
| sp Q0C8Z5 SMC1A_MOUSE  | Structural maintenance of chromosomes pr     | 144.72            | 1                    | 2 | 2 | 1 | 1      | 1 | 1 | 1 | 1     | 1 | 1 | 1 | 1       | 1               | 1      | 1              | 0.37390 | WT-scr only | 0.71013     | 0.50        | 0.72094     | 0.50        |      |
| accession              | description                                  | protein_set_score | 1                    | 2 | 3 | 1 | 2      | 3 | 1 | 2 | 3     |   |   |   |         |                 |        |                |         |             |             |             |             |             |      |

| accession              | description                                     | protein_set_score | 1  | 2  | 3  | 1 | 2  | 3  | 1 | 2 | 3 | 1  | 2  | 3  | WT | WT_0-93 | WT_0-82    | pvalue  | ratio | pvalue  | ratio | pvalue | ratio |
|------------------------|-------------------------------------------------|-------------------|----|----|----|---|----|----|---|---|---|----|----|----|----|---------|------------|---------|-------|---------|-------|--------|-------|
| sp P28352 APEX1_MOUSE  | DNA-(apurinic or apyrimidinic site) lyase OS    | 244.71            | 1  | 2  | 1  | 1 | 1  | 1  | 2 | 1 | 1 | 3  | 1  | 2  | 2  | 0.08215 | 0.25       | 0.79785 | 0.75  | 0.81207 | 1.00  |        |       |
| sp Q9WUJ1 CHIP_MOUSE   | STP1 homology and U box-containing prot         | 262.29            | 1  | 2  | 1  | 1 | 1  | 1  | 3 | 1 | 1 | 2  | 1  | 2  | 3  | 0.34651 | 0.33       | 0.67150 | 1.33  | 0.36970 | 1.67  |        |       |
| sp Q55019 IMPCT_MOUSE  | Protein IMPACT OS=Mus musculus (Mus)            | 206.1             | 1  | 2  | 2  | 1 | 1  | 1  | 1 | 1 | 1 | 1  | 1  | 2  | 2  | 0.15344 | WT-wt only | 0.91773 | 1.00  | 0.74503 | 0.67  |        |       |
| sp Q3C9V9 PUR9_MOUSE   | Bifunctional protein biosynthesis protein PUF   | 491.4             | 1  | 2  | 1  | 1 | 1  | 1  | 2 | 3 | 2 | 1  | 1  | 2  | 0  | 0.15344 | WT-wt only | 0.92710 | 1.00  | 0.90979 | 1.00  |        |       |
| sp Q7M73 NDUAC_MOUSE   | NADH dehydrogenase [ubiquinone] 1 alpha         | 504.77            | 1  | 1  | 3  | 1 | 1  | 1  | 5 | 1 | 3 | 3  | 2  | 3  | 3  | 0.14448 | 0.20       | 0.33905 | 1.80  | 0.16220 | 1.60  |        |       |
| sp Q99L18 HGS_MOUSE    | Hepatocyte growth factor-regulated tyrosine     | 317.61            | 1  | 1  | 1  | 1 | 1  | 1  | 1 | 2 | 1 | 1  | 3  | 3  | 1  | 0.08314 | 0.33       | 0.91815 | 1.00  | 0.59770 | 1.33  |        |       |
| sp Q62174 HNRLL_MOUSE  | Heterogeneous nuclear ribonucleoprotein L       | 368.35            | 1  | 1  | 1  | 1 | 1  | 1  | 2 | 1 | 1 | 1  | 1  | 3  | 0  | 0.00000 | WT-wt only | 0.98875 | 1.00  | 0.65731 | 0.67  |        |       |
| sp Q3UKU3 CRUK3_MOUSE  | Ubiquitin-like uncharacterized protein OS=Mus   | 154.54            | 1  | 1  | 1  | 1 | 1  | 1  | 1 | 1 | 1 | 1  | 1  | 3  | 0  | 0.00000 | WT-wt only | 0.98875 | 1.00  | 0.65731 | 0.67  |        |       |
| sp Q5DU25 IQEC2_MOUSE  | IQ motif and SEC domain-containing protein      | 116.53            | 1  | 1  | 1  | 1 | 1  | 1  | 1 | 1 | 1 | 1  | 1  | 3  | 0  | 0.00000 | WT-wt only | 0.53068 | 0.67  | 0.65731 | 0.67  |        |       |
| sp Q9KJ81 MYG1_MOUSE   | UPF0160 protein MYG1, mitochondrial OS          | 157.59            | 1  | 1  | 1  | 1 | 1  | 1  | 3 | 2 | 2 | 1  | 2  | 1  | 1  | 0.53515 | 0.50       | 0.78782 | 1.50  | 0.94411 | 1.00  |        |       |
| sp P12025 MK_MOUSE     | Middle kinase OS=Mus musculus (Mouse) GN=M      | 113.84            | 1  | 1  | 1  | 1 | 1  | 1  | 1 | 1 | 1 | 1  | 1  | 2  | 1  | 0.53515 | 0.50       | 0.96234 | 1.00  | 0.89255 | 1.00  |        |       |
| sp P7E2AX FRZAX_MOUSE  | Frizzled-related protein 1 OS=Mus m             | 174.67            | 1  | 1  | 1  | 1 | 1  | 1  | 2 | 2 | 1 | 1  | 1  | 2  | 1  | 0.50    | 0.50       | 0.97144 | 1.00  | 0.97144 | 1.00  |        |       |
| sp Q9G677 EXOC8_MOUSE  | Exocyst subunit component 8 OS=Mus m            | 193.78            | 1  | 1  | 1  | 1 | 1  | 1  | 2 | 1 | 1 | 1  | 1  | 2  | 0  | 0.11633 | WT-wt only | 0.60271 | 1.50  | 0.87133 | 1.00  |        |       |
| sp P28063 PSB8_MOUSE   | Proteasome subunit beta type-8 OS=Mus m         | 50.08             | 1  | 1  | 1  | 1 | 1  | 1  | 1 | 1 | 1 | 1  | 1  | 2  | 0  | 0.11633 | WT-wt only | 0.96234 | 1.00  | 0.98255 | 1.00  |        |       |
| sp Q30TLH PRC2_MOUSE   | Protein PRC2 OS=Mus musculus (Mus)              | 203.68            | 1  | 1  | 1  | 1 | 1  | 1  | 1 | 1 | 1 | 1  | 1  | 2  | 1  | 0.51472 | 0.50       | 0.97826 | 1.00  | 0.90617 | 1.00  |        |       |
| sp Q96W12 PEF5_MOUSE   | Peroxisomal targeting signal 1 receptor OS      | 168.27            | 1  | 1  | 1  | 1 | 1  | 1  | 1 | 1 | 1 | 1  | 1  | 2  | 0  | 0.45451 | 0.50       | 0.97826 | 1.00  | 0.90617 | 1.00  |        |       |
| sp Q9CAK1 C24T1_MOUSE  | Activator transcription factor 7 homolog 1 (loc | 73.12             | 1  | 1  | 1  | 1 | 1  | 1  | 1 | 1 | 1 | 1  | 1  | 2  | 0  | 0.11616 | WT-wt only | 0.97826 | 1.00  | 0.97826 | 1.00  |        |       |
| sp Q9D1L0 CHCH2_MOUSE  | Coiled-coil helix-coiled-coil helix domain-con  | 43.11             | 1  | 1  | 1  | 1 | 1  | 1  | 1 | 1 | 1 | 1  | 1  | 1  | 0  | 0.37390 | WT-wt only | 0.96559 | 1.00  | 0.99229 | 1.00  |        |       |
| sp Q98WQ2 VAC14_MOUSE  | Protein VAC14 homolog OS=Mus musculus           | 191.47            | 1  | 1  | 1  | 1 | 1  | 1  | 1 | 1 | 1 | 1  | 1  | 1  | 0  | 0.37390 | WT-wt only | 0.96559 | 1.00  | 0.99308 | 1.00  |        |       |
| sp Q9R146 AFPH_MOUSE   | Acylamino-acid-releasing enzyme OS=Mus          | 105.09            | 1  | 1  | 1  | 1 | 1  | 1  | 1 | 1 | 1 | 1  | 1  | 1  | 0  | 0.37390 | WT-wt only | 0.96559 | 1.00  | 0.99308 | 1.00  |        |       |
| sp P62322 LSME_MOUSE   | Ub1 snRNP-associated Sm-like protein LSME       | 113.86            | 1  | 1  | 1  | 1 | 1  | 1  | 1 | 1 | 1 | 1  | 1  | 1  | 0  | 0.37390 | WT-wt only | 0.96559 | 1.00  | 0.99308 | 1.00  |        |       |
| sp Q9R0G7 SPNS1_MOUSE  | Protein spindler homolog 1 OS=Mus muscu         | 48.19             | 1  | 1  | 1  | 1 | 1  | 1  | 1 | 1 | 1 | 1  | 1  | 1  | 0  | 0.37390 | WT-wt only | 0.96559 | 1.00  | 0.91525 | 1.00  |        |       |
| sp Q35691 PINN_MOUSE   | Pinin OS=Mus musculus (Mouse) GN=Pnn            | 127.09            | 1  | 1  | 1  | 1 | 1  | 1  | 1 | 1 | 1 | 1  | 1  | 1  | 0  | 0.37390 | WT-wt only | 0.96559 | 1.00  | 0.91525 | 1.00  |        |       |
| sp Q8J20 LINTA_MOUSE   | Protein lin-7 homolog A OS=Mus musculus         | 254.8             | 1  | 2  | 2  | 1 | 1  | 1  | 3 | 1 | 1 | 2  | 2  | 2  | 3  | 0.40451 | 0.50       | 0.70222 | 1.25  | 0.90700 | 1.00  |        |       |
| sp P99029 OC9E_MOUSE   | Cytochrome b-c1 complex subunit 6, mitoch       | 193.84            | 2  | 2  | 1  | 1 | 1  | 1  | 1 | 1 | 1 | 1  | 1  | 1  | 3  | 0.37568 | 0.33       | 0.80000 | 1.00  | 0.79859 | 1.00  |        |       |
| sp Q4JIM5 ABL2_MOUSE   | Ablotin uncharacterized protein OS=Mus m        | 140.08            | 1  | 1  | 1  | 1 | 1  | 1  | 2 | 1 | 1 | 1  | 1  | 1  | 3  | 0.37568 | 0.33       | 0.80000 | 1.00  | 0.79859 | 1.00  |        |       |
| sp Q9CT10 RANB3_MOUSE  | Ran-binding protein 3 OS=Mus musculus (M        | 241.55            | 1  | 1  | 1  | 1 | 1  | 1  | 2 | 1 | 1 | 1  | 1  | 2  | 2  | 0.48750 | 0.50       | 0.80004 | 1.00  | 0.79859 | 1.00  |        |       |
| sp Q9BCH1 INGEF_MOUSE  | Ephexin-1 OS=Mus musculus (Mouse) GN=           | 451.11            | 1  | 1  | 1  | 1 | 1  | 1  | 2 | 1 | 1 | 1  | 1  | 2  | 0  | 0.11658 | WT-wt only | 0.56888 | 1.50  | 0.51885 | 1.50  |        |       |
| sp Q35857 TIM44_MOUSE  | Mitochondrial import inner membrane transp      | 254.37            | 5  | 1  | 1  | 1 | 1  | 1  | 1 | 1 | 1 | 1  | 1  | 1  | 1  | 0.37390 | WT-wt only | 0.99012 | 1.00  | 0.98315 | 1.00  |        |       |
| sp Q9B0C3 S3F1_MOUSE   | Solanum family 35 member F1 OS=Mus m            | 67.68             | 1  | 1  | 1  | 1 | 1  | 1  | 1 | 1 | 1 | 1  | 1  | 1  | 0  | 0.37390 | WT-wt only | 0.94927 | 1.00  | 0.98065 | 1.00  |        |       |
| sp Q90963 PAFA_MOUSE   | Platelet-activating factor acetyltransferase O  | 40.98             | 1  | 1  | 1  | 1 | 1  | 1  | 1 | 1 | 1 | 1  | 1  | 1  | 0  | 0.37390 | WT-wt only | 0.96663 | 1.00  | 0.98065 | 1.00  |        |       |
| accession              | description                                     | protein_set_score | 1  | 2  | 3  | 1 | 2  | 3  | 1 | 2 | 3 | 1  | 2  | 3  | WT | WT_0-93 | WT_0-82    | pvalue  | ratio | pvalue  | ratio | pvalue | ratio |
| tr D3Y262 D3Y262_MOUSE | Unconventional myosin-Va OS=Mus muscu           | 3353.369          | 12 | 27 | 23 | 7 | 23 | 24 | 7 | 9 | 8 | 6  | 13 | 12 | 3  | 0.59991 | 0.87       | 0.05629 | 0.27  | 0.18386 | 0.50  |        |       |
| sp P31786 ACKP_MOUSE   | Acy-CoA-binding protein OS=Mus muscu            | 556.82            | 7  | 16 | 3  | 6 | 9  | 3  | 7 | 4 | 4 | 10 | 2  | 3  | 3  | 0.51424 | 0.69       | 0.30399 | 0.42  | 0.40120 | 0.46  |        |       |
| sp Q9Q2E5 COP1_MOUSE   | Cytochrome P-450 CYP1B1 OS=Mus muscu            | 621.21            | 6  | 5  | 4  | 2 | 2  | 2  | 2 | 2 | 2 | 2  | 2  | 2  | 3  | 0.37571 | 0.53       | 0.90761 | 0.60  | 0.64281 | 0.53  |        |       |
| sp Q12A2 SRP3_MOUSE    | SLIT-ROBO Rho GTPase-activating protein         | 699.06            | 6  | 2  | 6  | 2 | 2  | 2  | 2 | 2 | 2 | 2  | 2  | 2  | 0  | 0.80408 | 1.25       | 0.21054 | 0.50  | 0.57822 | 0.50  |        |       |
| sp P99027 RLA2_MOUSE   | 60S acidic ribosomal protein P2 OS=Mus m        | 438.56            | 7  | 3  | 9  | 3 | 4  | 4  | 4 | 4 | 4 | 4  | 4  | 4  | 1  | 0.86116 | 1.20       | 0.44090 | 0.40  | 0.46042 | 0.40  |        |       |
| sp Q50542 SYUA_MOUSE   | Alpha-synuclein OS=Mus musculus (Mouse)         | 507.69            | 5  | 13 | 1  | 4 | 4  | 2  | 2 | 5 | 1 | 1  | 3  | 2  | 3  | 0.43052 | 0.53       | 0.41642 | 0.42  | 0.32893 | 0.32  |        |       |
| sp Q60625 ICAM5_MOUSE  | Intercellular adhesion molecule 5 OS=Mus        | 557.71            | 3  | 8  | 9  | 6 | 10 | 3  | 2 | 6 | 2 | 3  | 4  | 3  | 3  | 0.81016 | 0.95       | 0.28572 | 0.50  | 0.16397 | 0.35  |        |       |
| sp Q3UG14 Q3UG14_MOUSE | Ubiquitin-like uncharacterized protein OS=      | 145.94            | 4  | 6  | 5  | 4 | 4  | 4  | 3 | 4 | 3 | 3  | 3  | 2  | 1  | 0.80282 | 1.13       | 0.2457  | 0.40  | 0.63934 | 0.40  |        |       |
| sp Q9DCS9 NDUBA_MOUSE  | NADH dehydrogenase [ubiquinone] 1 beta          | 659.61            | 2  | 6  | 3  | 6 | 6  | 3  | 4 | 1 | 1 | 3  | 2  | 3  | 2  | 0.48176 | 1.36       | 0.27486 | 0.45  | 0.29663 | 0.45  |        |       |
| sp Q60780 GAS7_MOUSE   | Growth arrest-specific protein 7 OS=Mus m       | 633.39            | 4  | 3  | 6  | 7 | 6  | 4  | 4 | 1 | 2 | 1  | 2  | 3  | 2  | 0.47499 | 1.31       | 0.13865 | 0.38  | 0.03407 | 0.15  |        |       |
| sp Q50544 IBR_MOUSE    | Active biphosphatase cluster region-related     | 612.47            | 4  | 3  | 4  | 6 | 6  | 4  | 3 | 1 | 1 | 2  | 3  | 3  | 2  | 0.14812 | 1.45       | 0.04806 | 0.45  | 0.19407 | 0.45  |        |       |
| sp Q9WU17 AR3_MOUSE    | Diphosphoamino transferase 3 OS=Mus m           | 571.78            | 3  | 4  | 2  | 4 | 2  | 3  | 4 | 2 | 2 | 2  | 2  | 2  | 0  | 0.65330 | 0.13       | 0.92920 | 0.40  | 0.46281 | 0.40  |        |       |
| sp Q90631 GRB2_MOUSE   | Growth factor receptor-bound protein 2 OS       | 523.77            | 3  | 4  | 4  | 2 | 3  | 2  | 3 | 2 | 3 | 2  | 3  | 2  | 1  | 0.35053 | 0.82       | 0.12726 | 0.45  | 0.01537 | 0.18  |        |       |
| sp Q9VD75 HIP1_MOUSE   | Huntingtin-interacting protein 1 OS=Mus m       | 726.08            | 4  | 4  | 2  | 4 | 2  | 3  | 1 | 2 | 1 | 2  | 2  | 3  | 3  | 0.66931 | 0.90       | 0.06810 | 0.40  | 0.12633 | 0.40  |        |       |
| sp Q35382 EXOC4_MOUSE  | Exocyst component 4 OS=Mus m                    | 474.06            | 2  | 2  | 2  | 3 | 3  | 2  | 1 | 1 | 1 | 2  | 3  | 3  | 3  | 0.18724 | 1.33       | 0.00019 | 0.50  | 0.11391 | 0.33  |        |       |
| sp Q7TDD2 TPP9_MOUSE   | Tubulin polymerization-promoting protein O      | 510.47            | 4  | 5  | 3  | 5 | 4  | 2  | 1 | 1 | 4 | 1  | 3  | 3  | 1  | 0.68860 | 0.92       | 0.03040 | 0.48  | 0.15251 | 0.50  |        |       |
| sp P91410 SRF3_MOUSE   | SRF family transcription factor 3 OS=M          | 221.22            | 2  | 2  | 1  | 5 | 4  | 2  | 2 | 2 | 1 | 2  | 2  | 3  | 2  | 0.90113 | 0.57       | 0.04623 | 0.40  | 0.04623 | 0.40  |        |       |
| sp Q9BYM5 NLGN3_MOUSE  | Neurigin-3 OS=Mus musculus (Mouse) GI           | 467.43            | 2  | 5  | 3  | 3 | 3  | 3  | 1 | 2 | 2 | 2  | 3  | 3  | 2  | 0.32121 | 0.75       | 0.07071 | 0.25  | 0.04933 | 0.17  |        |       |
| tr D3YV77 D3YV77_MOUSE | Protein Novx-2 OS=Mus musculus (Mouse)          | 320.7             | 5  | 2  | 2  | 2 | 3  | 4  | 4 | 1 | 1 | 1  | 3  | 3  | 2  | 0.89038 | 1.00       | 0.10480 | 0.22  | 0.30734 | 0.33  |        |       |
| sp Q91Y12 SNM4_MOUSE   | Sorting nexin-4 OS=Mus musculus (Mouse)         | 584.07            | 3  | 2  | 2  | 2 | 2  | 2  | 2 | 1 | 1 | 1  | 1  | 1  | 1  | 0.22854 | 0.86       | 0.03468 | 0.14  | 0.01028 | 0.14  |        |       |
| sp Q9J4H6 NDU3_MOUSE   | Cytochrome b-c1 complex subunit 3 OS=           | 660.91            | 2  | 1  | 1  | 3 | 1  | 1  | 1 | 1 | 3 | 1  | 2  | 2  | 0  | 0.39187 | 0.67       | 0.01947 | 0.40  | 0.01947 | 0.40  |        |       |
| sp Q88737 BSN_MOUSE    | Protein bassoon OS=Mus musculus (Mus)           | 842.14            | 2  | 3  | 2  | 2 | 3  | 1  | 1 | 1 | 1 | 1  | 1  | 1  | 3  | 0.44177 | 1.71       | 0.02805 | 0.29  | 0.02825 | 0.29  |        |       |
| sp Q9DD03 RAB13_MOUSE  | Ras-related protein Rab-1                       |                   |    |    |    |   |    |    |   |   |   |    |    |    |    |         |            |         |       |         |       |        |       |





|                        |                                                                                          |          |    |     |    |    |    |    |     |    |    |     |    |    |   |   |   |   |         |      |         |      |         |      |
|------------------------|------------------------------------------------------------------------------------------|----------|----|-----|----|----|----|----|-----|----|----|-----|----|----|---|---|---|---|---------|------|---------|------|---------|------|
| sp P18760 COF1_MOUSE   | Cofilin-1 OS=Mus musculus (Mouse) GN=C                                                   | 2235.44  | 72 | 72  | 62 | 61 | 75 | 81 | 67  | 58 | 70 | 58  | 49 | 54 | 3 | 3 | 3 | 3 | 0.97041 | 1.05 | 0.98663 | 0.95 | 0.06549 | 0.78 |
| sp P41042 TKT_MOUSE    | Transketolase OS=Mus musculus (Mouse)                                                    | 3070.63  | 72 | 63  | 76 | 74 | 69 | 81 | 66  | 63 | 71 | 51  | 55 | 51 | 3 | 3 | 3 | 3 | 0.90697 | 1.06 | 0.98804 | 0.95 | 0.26371 | 0.79 |
| sp P44227 STMY1_MOUSE  | Stathmin OS=Mus musculus (Mouse) GN=C                                                    | 1974.47  | 72 | 70  | 38 | 38 | 36 | 34 | 67  | 47 | 52 | 74  | 33 | 34 | 3 | 3 | 3 | 3 | 0.73986 | 1.12 | 0.74409 | 1.04 | 0.56364 | 0.79 |
| sp P18872 GNAO_MOUSE   | Guanine nucleotide-binding protein (G <i>o</i> ) subunit alpha-1 OS=Mus musculus (Mouse) | 3103.13  | 72 | 85  | 85 | 75 | 82 | 79 | 64  | 69 | 65 | 61  | 72 | 3  | 3 | 3 | 3 | 3 | 0.28745 | 0.98 | 0.19479 | 0.82 | 0.25209 | 0.81 |
| sp O08599 STXB1_MOUSE  | Syntaxin-13 OS=Mus musculus (Mouse)                                                      | 4381.2   | 71 | 86  | 89 | 81 | 91 | 83 | 68  | 63 | 68 | 81  | 73 | 59 | 3 | 3 | 3 | 3 | 0.87432 | 1.04 | 0.14623 | 0.81 | 0.83733 | 0.87 |
| sp P43277 H13_MOUSE    | Histone H1.3 OS=Mus musculus (Mouse)                                                     | 2272.18  | 71 | 65  | 60 | 62 | 62 | 49 | 105 | 79 | 44 | 127 | 69 | 50 | 3 | 3 | 3 | 3 | 0.93989 | 1.06 | 0.43674 | 1.16 | 0.27538 | 1.26 |
| sp Q1C513 DRC15_MOUSE  | Putative uncharacterized protein OS=Mus musculus (Mouse)                                 | 4071     | 70 | 72  | 72 | 72 | 84 | 76 | 88  | 77 | 64 | 52  | 62 | 65 | 3 | 3 | 3 | 3 | 0.31767 | 1.08 | 0.17232 | 1.07 | 0.48848 | 0.84 |
| sp P43252 PF2_MOUSE    | Phosphoglycerate kinase 1 OS=Mus musculus (Mouse)                                        | 4127.70  | 70 | 72  | 69 | 69 | 69 | 73 | 70  | 77 | 63 | 52  | 56 | 55 | 3 | 3 | 3 | 3 | 0.38630 | 1.18 | 0.20107 | 1.12 | 0.19153 | 0.87 |
| sp P43274 H14_MOUSE    | Histone H1.4 OS=Mus musculus (Mouse)                                                     | 2191.09  | 68 | 64  | 60 | 67 | 57 | 53 | 92  | 70 | 47 | 113 | 65 | 3  | 3 | 3 | 3 | 3 | 0.95904 | 1.03 | 0.47381 | 1.09 | 0.25354 | 1.19 |
| sp A2A070 TBB1_MOUSE   | Tubulin beta-1 chain OS=Mus musculus (Mouse)                                             | 604.49   | 67 | 51  | 57 | 50 | 55 | 60 | 60  | 53 | 55 | 54  | 53 | 60 | 3 | 3 | 3 | 3 | 0.35111 | 0.94 | 0.19299 | 0.96 | 0.53949 | 0.95 |
| sp P42806 H4_MOUSE     | Histone H4 OS=Mus musculus (Mouse)                                                       | 1524.11  | 67 | 66  | 64 | 64 | 64 | 64 | 64  | 64 | 64 | 64  | 64 | 64 | 3 | 3 | 3 | 3 | 0.15212 | 0.91 | 0.14129 | 0.91 | 0.19429 | 0.89 |
| sp Q64478 H2B1H_MOUSE  | Histone H2B type 1-H OS=Mus musculus (Mouse)                                             | 1630.09  | 67 | 104 | 86 | 97 | 90 | 83 | 85  | 96 | 62 | 97  | 96 | 65 | 3 | 3 | 3 | 3 | 0.95443 | 1.05 | 0.94626 | 0.95 | 0.48084 | 1.00 |
| sp Q02053 UBA1_MOUSE   | Ubiquitin-like modifier-activating enzyme 1 OS=Mus musculus (Mouse)                      | 4244.72  | 66 | 71  | 68 | 61 | 74 | 76 | 70  | 59 | 72 | 62  | 63 | 69 | 3 | 3 | 3 | 3 | 0.66915 | 1.03 | 0.60200 | 0.98 | 0.43456 | 0.95 |
| sp P10853 H2B1F_MOUSE  | Histone H2B type 1-F/UL OS=Mus musculus (Mouse)                                          | 1615.7   | 66 | 105 | 86 | 95 | 90 | 84 | 54  | 67 | 60 | 96  | 95 | 64 | 3 | 3 | 3 | 3 | 0.97734 | 1.05 | 0.99515 | 1.04 | 0.52929 | 0.99 |
| sp Q88723 ACTL7_MOUSE  | Beta-actin-like protein 7 OS=Mus musculus (Mouse)                                        | 2196.23  | 64 | 81  | 77 | 71 | 76 | 54 | 61  | 60 | 75 | 47  | 60 | 78 | 3 | 3 | 3 | 3 | 0.22123 | 0.93 | 0.52819 | 0.85 | 0.83843 | 0.83 |
| sp P15864 H12_MOUSE    | Histone H1.12 OS=Mus musculus (Mouse)                                                    | 1150.47  | 64 | 22  | 28 | 32 | 32 | 32 | 82  | 56 | 62 | 109 | 42 | 3  | 3 | 3 | 3 | 3 | 0.98133 | 1.00 | 0.74275 | 1.02 | 0.40055 | 1.17 |
| sp Q64525 H2B2B_MOUSE  | Histone H2B type 2-B OS=Mus musculus (Mouse)                                             | 1627.68  | 62 | 95  | 85 | 90 | 84 | 80 | 74  | 93 | 61 | 87  | 90 | 64 | 3 | 3 | 3 | 3 | 0.96563 | 1.05 | 0.98357 | 0.94 | 0.48536 | 1.00 |
| sp Q64475 H2B1B_MOUSE  | Histone H2B type 1-B OS=Mus musculus (Mouse)                                             | 1583     | 60 | 95  | 85 | 86 | 84 | 81 | 75  | 90 | 60 | 85  | 87 | 63 | 3 | 3 | 3 | 3 | 0.99182 | 1.05 | 0.99111 | 0.94 | 0.54793 | 0.98 |
| sp P10854 H2B1M_MOUSE  | Histone H2B type 1-M OS=Mus musculus (Mouse)                                             | 1590.94  | 60 | 92  | 85 | 87 | 81 | 80 | 74  | 90 | 51 | 96  | 87 | 64 | 3 | 3 | 3 | 3 | 0.98612 | 1.05 | 0.95705 | 0.95 | 0.46409 | 1.00 |
| sp Q8C027 H2B1F_MOUSE  | Histone H2B type 1-F OS=Mus musculus (Mouse)                                             | 1543.56  | 55 | 90  | 85 | 81 | 81 | 81 | 68  | 88 | 60 | 78  | 85 | 63 | 3 | 3 | 3 | 3 | 0.94467 | 1.06 | 0.99311 | 0.94 | 0.54106 | 0.99 |
| sp Q8C0V8 H133B_MOUSE  | 14-3-3 protein beta/alpha OS=Mus musculus (Mouse)                                        | 2707.711 | 58 | 79  | 68 | 68 | 70 | 63 | 68  | 58 | 55 | 57  | 54 | 48 | 3 | 3 | 3 | 3 | 0.50935 | 0.98 | 0.43526 | 0.88 | 0.25254 | 0.78 |
| sp P19821 H143G_MOUSE  | 14-3-3 protein gamma OS=Mus musculus (Mouse)                                             | 2560.041 | 63 | 72  | 73 | 70 | 78 | 78 | 74  | 58 | 53 | 71  | 52 | 48 | 3 | 3 | 3 | 3 | 0.52367 | 0.99 | 0.38709 | 0.89 | 0.35441 | 0.82 |
| sp P50516 VATA_MOUSE   | V-type proton ATPase catalytic subunit A OS=Mus musculus (Mouse)                         | 3286.76  | 61 | 67  | 61 | 68 | 77 | 68 | 62  | 45 | 53 | 58  | 51 | 52 | 3 | 3 | 3 | 3 | 0.70942 | 1.07 | 0.02565 | 0.85 | 0.29970 | 0.85 |
| sp P50396 GDA_MOUSE    | Rap GTP dissociation inhibitor alpha OS=Mus musculus (Mouse)                             | 3418.31  | 55 | 66  | 59 | 55 | 68 | 59 | 53  | 52 | 54 | 56  | 51 | 49 | 3 | 3 | 3 | 3 | 0.51981 | 1.01 | 0.32222 | 0.88 | 0.76960 | 0.87 |
| sp P50281 VATB2_MOUSE  | V-type proton ATPase subunit B OS=Mus musculus (Mouse)                                   | 1937.99  | 57 | 64  | 60 | 61 | 61 | 57 | 60  | 61 | 61 | 61  | 61 | 61 | 3 | 3 | 3 | 3 | 0.98531 | 1.05 | 0.65631 | 0.95 | 0.25281 | 0.85 |
| sp P48962 ADT1_MOUSE   | ADP/ATP translocase 1 OS=Mus musculus (Mouse)                                            | 2496.59  | 54 | 61  | 60 | 61 | 57 | 74 | 51  | 60 | 66 | 48  | 48 | 3  | 3 | 3 | 3 | 3 | 0.48456 | 1.00 | 0.29023 | 1.04 | 0.66007 | 0.92 |
| sp P62874 GBB1_MOUSE   | Guanine nucleotide-binding protein (G <i>i</i> ) beta-1 OS=Mus musculus (Mouse)          | 2951.47  | 60 | 61  | 61 | 66 | 76 | 63 | 70  | 63 | 59 | 67  | 50 | 54 | 3 | 3 | 3 | 3 | 0.23162 | 1.13 | 0.04766 | 1.05 | 0.13135 | 0.94 |
| sp P20122 VIME_MOUSE   | Vimentin OS=Mus musculus (Mouse) GN=C                                                    | 2787.57  | 51 | 37  | 55 | 68 | 45 | 93 | 83  | 40 | 78 | 73  | 44 | 83 | 3 | 3 | 3 | 3 | 0.29822 | 1.44 | 0.18952 | 1.41 | 0.12818 | 1.40 |
| sp P50533 DLC_MOUSE    | Disulfide isomerase OS=Mus musculus (Mouse)                                              | 2175.609 | 54 | 54  | 54 | 54 | 54 | 54 | 54  | 54 | 54 | 54  | 54 | 54 | 3 | 3 | 3 | 3 | 0.16273 | 1.18 | 0.20734 | 1.22 | 0.19134 | 1.22 |
| sp Q5H28 OSH2B_MOUSE   | isocitrate dehydrogenase (NADP) OS=Mus musculus (Mouse)                                  | 3016.47  | 59 | 54  | 55 | 53 | 62 | 67 | 56  | 45 | 64 | 47  | 39 | 54 | 3 | 3 | 3 | 3 | 0.66033 | 1.08 | 0.76730 | 0.98 | 0.63063 | 0.83 |
| sp Q88844 DHC_MOUSE    | isocitrate dehydrogenase (NADP) cytoplasmic isoform OS=Mus musculus (Mouse)              | 3016.47  | 59 | 54  | 55 | 53 | 62 | 67 | 56  | 45 | 64 | 47  | 39 | 54 | 3 | 3 | 3 | 3 | 0.66033 | 1.08 | 0.76730 | 0.98 | 0.63063 | 0.83 |
| sp P19096 FAS_MOUSE    | Fatty acid synthase OS=Mus musculus (Mouse)                                              | 6085.921 | 60 | 43  | 40 | 39 | 65 | 65 | 58  | 47 | 51 | 42  | 31 | 46 | 3 | 3 | 3 | 3 | 0.58459 | 1.18 | 0.33628 | 1.09 | 0.74159 | 0.83 |
| sp Q8R097 UOJ1_MOUSE   | Ubiquitin carboxyl-terminal hydrolase isozyme 1 OS=Mus musculus (Mouse)                  | 1960.23  | 62 | 51  | 54 | 58 | 60 | 64 | 62  | 50 | 50 | 41  | 52 | 3  | 3 | 3 | 3 | 3 | 0.64411 | 1.09 | 0.13179 | 0.97 | 0.63270 | 0.94 |
| sp P27773 PDIA3_MOUSE  | Protein disulfide-isomerase A3 OS=Mus musculus (Mouse)                                   | 2512.19  | 52 | 21  | 21 | 21 | 21 | 21 | 72  | 72 | 72 | 72  | 72 | 3  | 3 | 3 | 3 | 3 | 0.10489 | 1.01 | 0.07489 | 1.01 | 0.07489 | 1.01 |
| sp P62259 H1433E_MOUSE | 14-3-3 protein epsilon OS=Mus musculus (Mouse)                                           | 2298.8   | 40 | 52  | 49 | 41 | 55 | 57 | 59  | 36 | 43 | 54  | 34 | 44 | 3 | 3 | 3 | 3 | 0.77943 | 0.99 | 0.86400 | 0.98 | 0.73503 | 0.93 |
| sp D5MR34 D5MR34_MOUSE | Tubulin beta 3 OS=Mus musculus (Mouse)                                                   | 938.37   | 62 | 43  | 52 | 42 | 49 | 57 | 52  | 50 | 53 | 49  | 46 | 51 | 3 | 3 | 3 | 3 | 0.76518 | 1.01 | 0.75906 | 0.99 | 0.70808 | 0.93 |
| sp Q3U1B1 Q3U1B1_MOUSE | Putative uncharacterized protein OS=Mus musculus (Mouse)                                 | 2422.72  | 53 | 52  | 52 | 55 | 66 | 56 | 60  | 54 | 50 | 59  | 45 | 46 | 3 | 3 | 3 | 3 | 0.18273 | 1.13 | 0.07877 | 1.04 | 0.08247 | 0.96 |
| sp P20029 GRF7_MOUSE   | Grb7 OS=Mus musculus (Mouse)                                                             | 2023.38  | 59 | 60  | 50 | 50 | 50 | 50 | 63  | 65 | 65 | 65  | 65 | 65 | 3 | 3 | 3 | 3 | 0.99335 | 1.05 | 0.96335 | 1.05 | 0.26821 | 0.82 |
| sp Q3U292 Q3U292_MOUSE | Putative uncharacterized protein OS=Mus musculus (Mouse)                                 | 1850.77  | 62 | 57  | 51 | 81 | 56 | 42 | 87  | 64 | 39 | 103 | 57 | 42 | 3 | 3 | 3 | 3 | 0.94965 | 1.05 | 0.91928 | 1.12 | 0.23237 | 1.19 |
| sp P22752 H2A1_MOUSE   | Histone H2A type 1 OS=Mus musculus (Mouse)                                               | 708.89   | 49 | 49  | 45 | 61 | 49 | 47 | 70  | 48 | 40 | 64  | 42 | 37 | 3 | 3 | 3 | 3 | 0.68280 | 1.10 | 0.32805 | 1.10 | 0.39959 | 1.00 |
| sp Q89K0 ACON_MOUSE    | Aconitate hydratase, mitochondrial OS=Mus musculus (Mouse)                               | 3506.08  | 37 | 51  | 49 | 48 | 54 | 54 | 55  | 41 | 57 | 49  | 42 | 47 | 3 | 3 | 3 | 3 | 0.40827 | 1.14 | 0.28214 | 1.12 | 0.23616 | 1.01 |
| sp P17156 GRP72_MOUSE  | Heat shock-related 70 kDa protein 2 OS=Mus musculus (Mouse)                              | 1658.99  | 55 | 52  | 55 | 49 | 57 | 49 | 45  | 52 | 52 | 42  | 50 | 52 | 3 | 3 | 3 | 3 | 0.17150 | 0.97 | 0.53358 | 0.93 | 0.22226 | 0.90 |
| sp P28652 KCCB2_MOUSE  | Calcium/calmodulin-dependent protein kinase beta OS=Mus musculus (Mouse)                 | 2884.94  | 40 | 38  | 38 | 38 | 38 | 38 | 43  | 39 | 38 | 38  | 38 | 38 | 3 | 3 | 3 | 3 | 0.76244 | 1.01 | 0.76244 | 1.01 | 0.76244 | 1.01 |
| sp P38647 GRP75_MOUSE  | Stress-70 protein, mitochondrial OS=Mus musculus (Mouse)                                 | 2994.14  | 42 | 45  | 46 | 42 | 44 | 45 | 45  | 40 | 43 | 40  | 46 | 37 | 3 | 3 | 3 | 3 | 0.20162 | 0.98 | 0.75123 | 0.96 | 0.67183 | 0.92 |
| sp Q8R1M2 H2A_MOUSE    | Histone H2A-J OS=Mus musculus (Mouse)                                                    | 654.89   | 47 | 45  | 44 | 51 | 45 | 44 | 54  | 47 | 40 | 42  | 37 | 3  | 3 | 3 | 3 | 3 | 0.86651 | 1.03 | 0.25228 | 1.04 | 0.71890 | 0.90 |
| sp P14152 HDC_MOUSE    | Malate dehydrogenase, cytoplasmic OS=Mus musculus (Mouse)                                | 1884.12  | 42 | 48  | 51 | 46 | 60 | 50 | 52  | 45 | 44 | 48  | 40 | 37 | 3 | 3 | 3 | 3 | 0.57409 | 1.11 | 0.46693 | 1.00 | 0.99099 | 0.89 |
| sp Q8D061 HNRPM_MOUSE  | Heterogeneous nuclear ribonucleoprotein M OS=Mus musculus (Mouse)                        | 2477.81  | 42 | 48  | 48 | 48 | 48 | 48 | 48  | 48 | 48 | 48  | 48 | 48 | 3 | 3 | 3 | 3 | 0.58871 | 1.02 | 0.58871 | 1.02 | 0.58871 | 1.02 |
| sp P46460 NSF_MOUSE    | Vesicle-fusion ATPase OS=Mus musculus (Mouse)                                            | 2997.06  | 46 | 54  | 54 | 45 | 61 | 49 | 50  | 49 | 53 | 38  | 39 | 36 | 3 | 3 | 3 | 3 | 0.61776 | 1.01 | 0.60911 | 0.99 | 0.10150 | 0.73 |
| sp Q1553 FSCN1_MOUSE   | Fascin OS=Mus musculus (Mouse) GN=C                                                      | 2681.931 | 44 | 47  | 39 | 44 | 52 | 50 | 49  | 37 | 47 | 44  | 37 | 40 | 3 | 3 | 3 | 3 |         |      |         |      |         |      |

|                        |                                                     |         |    |    |    |    |    |    |    |    |    |    |    |    |   |   |   |         |       |         |      |         |      |
|------------------------|-----------------------------------------------------|---------|----|----|----|----|----|----|----|----|----|----|----|----|---|---|---|---------|-------|---------|------|---------|------|
| sp Q0B20 ATP0_MOUSE    | ATP synthase subunit O, mitochondrial OS            | 1315.36 | 25 | 24 | 26 | 24 | 23 | 20 | 27 | 24 | 22 | 25 | 26 | 3  | 3 | 3 | 3 | 0.12715 | 0.89  | 0.94303 | 0.95 | 0.42531 | 0.97 |
| sp P06843 FAA1_MOUSE   | Eukaryotic initiation factor 4A1 OS=Mus mus         | 1655.42 | 25 | 24 | 21 | 26 | 25 | 27 | 27 | 24 | 24 | 25 | 26 | 3  | 3 | 3 | 3 | 0.36697 | 1.11  | 0.72809 | 0.99 | 0.19820 | 1.01 |
| sp P03151 CFD_MOUSE    | -complex protein 1 subunit delta OS=Mus             | 251.58  | 26 | 24 | 20 | 20 | 26 | 27 | 16 | 22 | 24 | 24 | 25 | 3  | 3 | 3 | 3 | 0.58154 | 0.98  | 0.92292 | 0.87 | 0.48243 | 0.94 |
| sp P27659 RL3_MOUSE    | 60S ribosomal protein L3 OS=Mus muscu               | 1285.56 | 25 | 23 | 23 | 21 | 24 | 25 | 16 | 28 | 23 | 18 | 23 | 3  | 3 | 3 | 3 | 0.26624 | 0.99  | 0.94254 | 0.94 | 0.75040 | 0.92 |
| sp P10630 F4A2_MOUSE   | Eukaryotic initiation factor 4A1i OS=Mus m          | 1592.2  | 24 | 22 | 18 | 21 | 21 | 21 | 21 | 17 | 20 | 20 | 16 | 23 | 3 | 3 | 3 | 0.51482 | 0.98  | 0.63868 | 0.91 | 0.74342 | 0.92 |
| sp Q0C213 QCR1_MOUSE   | Cytochrome b-c1 complex subunit 1, mito             | 1592.5  | 26 | 19 | 26 | 24 | 29 | 19 | 23 | 25 | 22 | 29 | 19 | 22 | 3 | 3 | 3 | 0.82109 | 1.01  | 0.78180 | 0.99 | 0.49512 | 0.99 |
| sp P03355 PCBP1_MOUSE  | Poly(C)binding protein 1 OS=Mus muscu               | 1227.62 | 16 | 16 | 14 | 15 | 16 | 12 | 20 | 17 | 14 | 14 | 22 | 3  | 3 | 3 | 3 | 0.22981 | 0.98  | 0.54707 | 1.07 | 0.36510 | 1.09 |
| sp P17426 AR2A1_MOUSE  | Ar2 domain-containing protein 1 OS=Mus              | 1476.76 | 25 | 21 | 25 | 25 | 22 | 22 | 22 | 22 | 22 | 22 | 22 | 3  | 3 | 3 | 3 | 0.28260 | 1.07  | 0.72177 | 1.00 | 0.28260 | 1.00 |
| sp P03171 TCP2_MOUSE   | T-complex protein 1 subunit zeta OS=Mus             | 1823.75 | 24 | 24 | 21 | 17 | 23 | 24 | 21 | 24 | 21 | 14 | 21 | 3  | 3 | 3 | 3 | 0.29266 | 0.94  | 0.37216 | 1.00 | 0.44261 | 0.81 |
| sp P03001 RAC1_MOUSE   | Ras-related C3 botulinum toxin substrate 1          | 887.79  | 25 | 21 | 21 | 24 | 23 | 22 | 20 | 22 | 23 | 18 | 22 | 20 | 3 | 3 | 3 | 0.85622 | 1.03  | 0.79911 | 0.97 | 0.88217 | 0.90 |
| sp P17710 HKK1_MOUSE   | Hekoxinase-1 OS=Mus musculus (Mouse)                | 2637.04 | 24 | 20 | 25 | 20 | 22 | 24 | 26 | 19 | 18 | 26 | 20 | 3  | 3 | 3 | 3 | 0.59993 | 0.96  | 0.93222 | 0.80 | 0.36854 | 0.84 |
| sp Q01655 DOK1_MOUSE   | Docking protein 1 OS=Mus musculus (Mou              | 1164.2  | 11 | 15 | 14 | 15 | 15 | 14 | 14 | 14 | 14 | 14 | 14 | 3  | 3 | 3 | 3 | 0.13366 | 1.41  | 0.03308 | 1.44 | 0.03366 | 1.44 |
| sp P02922 EPZF0_MOUSE  | Nucleoside diphosphate kinase OS=Mus r              | 860.91  | 19 | 20 | 19 | 20 | 21 | 25 | 20 | 23 | 23 | 24 | 20 | 3  | 3 | 3 | 3 | 0.89969 | 1.05  | 0.00372 | 1.17 | 0.34555 | 0.98 |
| sp P05201 AACT_MOUSE   | Aspartate aminotransferase, cytoplasmic O           | 1688.59 | 19 | 25 | 18 | 22 | 26 | 14 | 18 | 15 | 22 | 19 | 13 | 3  | 3 | 3 | 3 | 0.82338 | 1.00  | 0.53736 | 1.05 | 0.73105 | 0.84 |
| sp Q13UM7 Q3UM7_MOUSE  | Putative uncharacterized protein OS=Mus             | 1676.06 | 23 | 27 | 19 | 27 | 29 | 20 | 30 | 22 | 21 | 29 | 23 | 19 | 3 | 3 | 3 | 0.09508 | 1.23  | 0.35112 | 1.06 | 0.25465 | 1.03 |
| sp Q0A16 THIO_MOUSE    | Acetyl-CoA acetyltransferase, cytosolic OS          | 1558.24 | 25 | 21 | 25 | 21 | 28 | 27 | 21 | 22 | 28 | 18 | 17 | 3  | 3 | 3 | 3 | 0.88835 | 1.07  | 0.70551 | 1.00 | 0.21772 | 0.76 |
| sp Q05W89 OSW89_MOUSE  | Protein Rat-1a OS=Mus musculus (Mouse)              | 1596.53 | 25 | 22 | 27 | 20 | 26 | 19 | 19 | 19 | 18 | 19 | 18 | 3  | 3 | 3 | 3 | 0.29463 | 0.95  | 0.68925 | 0.95 | 0.33071 | 0.78 |
| sp P11983 TCPA_MOUSE   | T-complex protein 1 subunit alpha OS=Mu             | 2185.8  | 16 | 16 | 16 | 17 | 20 | 22 | 19 | 17 | 17 | 14 | 19 | 3  | 3 | 3 | 3 | 0.07038 | 1.23  | 0.00681 | 1.10 | 0.16928 | 1.04 |
| sp P08752 GNA2_MOUSE   | Guanine nucleotide-binding protein (G <i>β</i> ) su | 1513.98 | 20 | 23 | 21 | 22 | 25 | 23 | 22 | 12 | 14 | 26 | 19 | 3  | 3 | 3 | 3 | 0.23677 | 1.09  | 0.10215 | 0.75 | 0.19384 | 0.98 |
| sp P03178 TCPE_MOUSE   | T-complex protein 1 subunit epsilon OS=Mu           | 1967.26 | 25 | 22 | 21 | 14 | 24 | 24 | 16 | 19 | 19 | 23 | 17 | 3  | 3 | 3 | 3 | 0.35297 | 0.91  | 0.28981 | 0.81 | 0.35363 | 0.85 |
| sp P00585 HZAZ_MOUSE   | Histone H2AZ OS=Mus musculus (Mouse)                | 433.71  | 18 | 17 | 18 | 21 | 16 | 10 | 24 | 20 | 18 | 22 | 16 | 3  | 3 | 3 | 3 | 0.91783 | 1.06  | 0.02754 | 1.17 | 0.02681 | 1.06 |
| sp P02821 RAB1A_MOUSE  | Ras-related protein Rab-1A OS=Mus musc              | 1573.59 | 27 | 25 | 26 | 20 | 20 | 26 | 18 | 19 | 23 | 18 | 15 | 3  | 3 | 3 | 3 | 0.42549 | 0.97  | 0.06814 | 0.81 | 0.30136 | 0.78 |
| sp P56399 UBP5_MOUSE   | Ubiquitin carboxyl-terminal hydrolase 5 OS          | 2002.94 | 15 | 18 | 20 | 19 | 24 | 25 | 16 | 14 | 13 | 14 | 15 | 3  | 3 | 3 | 3 | 0.13046 | 1.28  | 0.19480 | 0.81 | 0.93314 | 0.89 |
| sp Q01900 PCBP2_MOUSE  | Poly(C)binding protein 2 OS=Mus muscu               | 957.31  | 15 | 14 | 14 | 13 | 11 | 17 | 14 | 16 | 14 | 16 | 13 | 3  | 3 | 3 | 3 | 0.41649 | 0.93  | 0.55743 | 1.00 | 0.15873 | 1.07 |
| sp Q0B033 AP2B1_MOUSE  | AP-2 complex subunit beta OS=Mus muscu              | 2965.74 | 18 | 21 | 15 | 18 | 22 | 22 | 15 | 15 | 15 | 12 | 13 | 3  | 3 | 3 | 3 | 0.33373 | 1.15  | 0.18441 | 0.93 | 0.69123 | 0.94 |
| sp Q05802 GPR4_MOUSE   | Neutrophin receptor OS=Mus musculus (M              | 940.55  | 18 | 21 | 25 | 21 | 25 | 19 | 15 | 16 | 16 | 11 | 18 | 3  | 3 | 3 | 3 | 0.92696 | 1.05  | 0.01626 | 1.23 | 0.69013 | 0.95 |
| sp Q13JL8 Q3TL8_MOUSE  | Putative uncharacterized protein OS=Mus             | 1544.02 | 14 | 14 | 15 | 14 | 15 | 19 | 18 | 16 | 12 | 11 | 18 | 3  | 3 | 3 | 3 | 0.92696 | 1.05  | 0.01626 | 1.23 | 0.69013 | 0.95 |
| sp Q02288 PDIa6_MOUSE  | Protein disulfide-isomerase A6 OS=Mus m             | 1372.08 | 13 | 13 | 15 | 14 | 15 | 15 | 16 | 16 | 17 | 11 | 11 | 3  | 3 | 3 | 3 | 0.76327 | 0.107 | 0.01422 | 1.24 | 0.64924 | 0.98 |
| sp Q09C22 ATPH_MOUSE   | ATP synthase subunit e, mitochondrial OS            | 984.51  | 17 | 21 | 16 | 19 | 24 | 21 | 23 | 19 | 19 | 24 | 19 | 3  | 3 | 3 | 3 | 0.16647 | 1.19  | 0.04329 | 1.13 | 0.05103 | 1.11 |
| sp P07765 H2AX_MOUSE   | Histone H2AX OS=Mus musculus (Mouse)                | 593.44  | 22 | 17 | 15 | 18 | 17 | 19 | 21 | 22 | 12 | 29 | 17 | 3  | 3 | 3 | 3 | 0.59905 | 0.91  | 0.21484 | 0.87 | 0.18512 | 1.02 |
| sp Q08809 DCI_MOUSE    | Neuronal migration protein doublecortin OS          | 1375.84 | 23 | 21 | 21 | 23 | 22 | 24 | 25 | 20 | 19 | 21 | 17 | 3  | 3 | 3 | 3 | 0.83381 | 1.06  | 0.57601 | 0.98 | 0.60520 | 0.86 |
| sp Q0BH59 CMC1_MOUSE   | Calcium-binding mitochondrial carrier protei        | 2199.38 | 11 | 19 | 19 | 15 | 17 | 16 | 17 | 13 | 19 | 12 | 17 | 3  | 3 | 3 | 3 | 0.70548 | 0.98  | 0.91716 | 1.00 | 0.74365 | 0.94 |
| sp Q09P71 GDIR1_MOUSE  | Rho GDP-dissociation inhibitor 1 OS=Mus             | 1194.46 | 24 | 28 | 18 | 22 | 27 | 26 | 30 | 21 | 18 | 25 | 14 | 17 | 3 | 3 | 3 | 0.84142 | 1.07  | 0.83961 | 0.99 | 0.49663 | 0.80 |
| sp Q01758 NDKB_MOUSE   | Nucleoside diphosphate kinase B OS=Mus              | 771.67  | 18 | 17 | 15 | 18 | 17 | 19 | 21 | 16 | 19 | 20 | 17 | 3  | 3 | 3 | 3 | 0.55236 | 1.10  | 0.05952 | 1.12 | 0.62216 | 0.96 |
| sp P17879 HST1B_MOUSE  | Heat shock 70 kDa protein 1 OS=Mus mu               | 1383.47 | 15 | 14 | 15 | 14 | 15 | 15 | 14 | 14 | 14 | 14 | 14 | 3  | 3 | 3 | 3 | 0.82051 | 0.98  | 0.64845 | 0.89 | 0.67895 | 0.78 |
| sp Q01V12 BACH_MOUSE   | Cytochrome c oxidase A thioester hydroly            | 1042.77 | 15 | 19 | 21 | 18 | 22 | 19 | 17 | 13 | 15 | 15 | 16 | 3  | 3 | 3 | 3 | 0.86284 | 1.07  | 0.25566 | 0.82 | 0.61255 | 0.95 |
| sp Q0C28 SCRNI_MOUSE   | Secam-1 OS=Mus musculus (Mouse) GN                  | 1132.8  | 19 | 16 | 17 | 16 | 22 | 21 | 15 | 17 | 14 | 15 | 14 | 3  | 3 | 3 | 3 | 0.46951 | 1.13  | 0.60219 | 0.88 | 0.85919 | 0.87 |
| sp Q03086 DHE3_BOVIN   | Glutamate dehydrogenase 1, mitochondrial            | 1634.37 | 20 | 16 | 26 | 18 | 23 | 21 | 15 | 22 | 25 | 13 | 16 | 3  | 3 | 3 | 3 | 0.60967 | 0.95  | 0.15222 | 0.94 | 0.85258 | 0.87 |
| sp Q01765 KNI_MOUSE    | Kinesin heavy chain OS=Mus musculus (M              | 1976.89 | 17 | 15 | 14 | 15 | 19 | 19 | 12 | 16 | 15 | 17 | 15 | 3  | 3 | 3 | 3 | 0.44722 | 1.02  | 0.13464 | 0.87 | 0.18801 | 1.01 |
| sp Q08FR5 EFTU_MOUSE   | Elongation factor Tu, mitochondrial OS=Mu           | 1075.32 | 17 | 17 | 15 | 15 | 13 | 13 | 15 | 13 | 15 | 13 | 16 | 3  | 3 | 3 | 3 | 0.08323 | 0.90  | 0.23179 | 0.88 | 0.81531 | 0.90 |
| sp Q020E5 FPP5_MOUSE   | Farnesyl pyrophosphate synthase OS=Mus              | 1316.66 | 19 | 15 | 15 | 13 | 21 | 22 | 12 | 14 | 18 | 12 | 13 | 3  | 3 | 3 | 3 | 0.65215 | 1.14  | 0.82092 | 0.90 | 0.79258 | 0.84 |
| sp P03011 RAB3A_MOUSE  | Ras-related protein Rab-3A OS=Mus muscu             | 1342.37 | 16 | 19 | 15 | 12 | 21 | 20 | 18 | 15 | 17 | 18 | 12 | 3  | 3 | 3 | 3 | 0.97609 | 1.06  | 0.40347 | 1.00 | 0.70794 | 0.92 |
| sp Q07XK5 Q3TK5_MOUSE  | Putative uncharacterized protein OS=Mus             | 1947.04 | 22 | 14 | 14 | 17 | 23 | 24 | 28 | 16 | 18 | 11 | 16 | 3  | 3 | 3 | 3 | 0.35547 | 1.25  | 0.39624 | 1.18 | 0.94558 | 0.88 |
| sp P03554 CAL_MOUSE    | Calnexin OS=Mus musculus (Mouse) GN                 | 1947.04 | 22 | 14 | 14 | 17 | 23 | 24 | 28 | 16 | 18 | 11 | 16 | 3  | 3 | 3 | 3 | 0.35547 | 1.25  | 0.39624 | 1.18 | 0.94558 | 0.88 |
| sp Q01703 MATR3_MOUSE  | Matrin-3 OS=Mus musculus (Mouse) GN=M               | 1984.35 | 26 | 22 | 15 | 20 | 28 | 26 | 22 | 22 | 23 | 25 | 23 | 3  | 3 | 3 | 3 | 0.51979 | 1.17  | 0.40757 | 1.06 | 0.56920 | 1.00 |
| sp P47963 RL13_MOUSE   | 60S ribosomal protein L13 OS=Mus muscu              | 970.71  | 19 | 18 | 14 | 16 | 21 | 20 | 21 | 19 | 22 | 17 | 15 | 3  | 3 | 3 | 3 | 0.54915 | 1.12  | 0.06792 | 1.20 | 0.15555 | 1.06 |
| sp Q01699 HS105_MOUSE  | Heat shock protein 105 kDa OS=Mus musc              | 2701.64 | 15 | 15 | 15 | 15 | 16 | 23 | 15 | 16 | 16 | 16 | 15 | 3  | 3 | 3 | 3 | 0.33693 | 1.13  | 0.06717 | 1.20 | 0.07899 | 1.04 |
| sp Q02K23 SDA_MOUSE    | Sodium-dependent anion exchanger 1 OS=              | 1774.96 | 21 | 14 | 14 | 16 | 19 | 19 | 17 | 14 | 16 | 17 | 14 | 3  | 3 | 3 | 3 | 0.21446 | 1.02  | 0.13464 | 0.87 | 0.18512 | 1.02 |
| sp Q0DBP5 PKCV_MOUSE   | UMP-CMP kinase OS=Mus musculus (Mou                 | 907.41  | 12 | 14 | 12 | 17 | 15 | 16 | 18 | 14 | 15 | 18 | 14 | 3  | 3 | 3 | 3 | 0.29120 | 1.16  | 0.04716 | 1.29 | 0.00039 | 1.24 |
| sp Q0C208 Q0C208_MOUSE | ATP synthase subunit gamma OS=Mus m                 | 1130.44 | 17 | 20 | 12 | 16 | 18 | 16 | 18 | 14 | 15 | 17 | 13 | 3  | 3 | 3 | 3 | 0.86872 | 1.02  | 0.92447 | 0.96 | 0.76888 | 0.92 |
| sp P415591 COF2_MOUSE  | Coflin-2 OS=Mus musculus (Mouse) GN=C               | 936.41  | 20 | 21 | 21 | 20 | 20 | 18 | 16 | 23 | 12 | 12 | 15 | 3  | 3 | 3 | 3 | 0.15391 | 0.94  | 0.84992 | 0.92 | 0.02932 | 0.83 |
| sp P07300 NFYB_MOUSE   | Neurofilin OS=Mus musculus (Mouse) G</              |         |    |    |    |    |    |    |    |    |    |    |    |    |   |   |   |         |       |         |      |         |      |

|                              |                                             |          |    |    |    |    |    |    |    |    |    |    |    |    |   |   |   |   |         |      |         |      |         |      |
|------------------------------|---------------------------------------------|----------|----|----|----|----|----|----|----|----|----|----|----|----|---|---|---|---|---------|------|---------|------|---------|------|
| sp B0V2N1 PTFRS_MOUSE        | Receptor-type tyrosine-protein phosphatase  | 1398.54  | 11 | 11 | 11 | 10 | 8  | 7  | 8  | 9  | 11 | 9  | 7  | 7  | 3 | 3 | 3 | 3 | 0.05277 | 0.76 | 0.47316 | 0.85 | 0.00121 | 0.70 |
| sp P93029 PROX5_MOUSE        | Peroxodioxin-5, mitochondrial OS=Mus mus    | 949.24   | 15 | 14 | 8  | 14 | 20 | 18 | 18 | 16 | 15 | 14 | 11 | 16 | 3 | 3 | 3 | 3 | 0.15602 | 1.41 | 0.08179 | 1.32 | 0.30103 | 1.11 |
| sp Q6CA19 C2C19_MOUSE        | Putative uncharacterized protein OS=Mus mu  | 1469.94  | 18 | 9  | 15 | 16 | 20 | 15 | 12 | 16 | 14 | 12 | 14 | 3  | 3 | 3 | 3 | 3 | 0.04977 | 1.40 | 0.65193 | 1.08 | 0.52882 | 1.00 |
| sp Q1937 NPIM_MOUSE          | Nucleophosmin OS=Mus musculus (Mouse)       | 1346.99  | 16 | 17 | 15 | 12 | 13 | 19 | 12 | 16 | 18 | 12 | 12 | 3  | 3 | 3 | 3 | 3 | 0.95180 | 1.05 | 0.28353 | 1.24 | 0.36034 | 1.11 |
| sp P60879 SNP25_MOUSE        | Synaptosomal-associated protein 25 OS=M     | 1217.66  | 18 | 20 | 6  | 14 | 13 | 14 | 17 | 23 | 17 | 16 | 19 | 10 | 3 | 3 | 3 | 3 | 0.74807 | 0.93 | 0.32694 | 1.30 | 0.66116 | 1.02 |
| sp P55821 STM2_MOUSE         | Stathmin-2 OS=Mus musculus (Mouse) GN       | 733.25   | 17 | 17 | 10 | 17 | 14 | 14 | 19 | 12 | 14 | 22 | 10 | 11 | 3 | 3 | 3 | 3 | 0.93661 | 1.02 | 0.69604 | 1.02 | 0.77437 | 0.98 |
| sp A0A07WFL A0A07WFLP5_MOUSE | ATP-dependent RNA helicase A OS=Mus m       | 1978.97  | 15 | 15 | 10 | 15 | 15 | 12 | 9  | 15 | 15 | 16 | 13 | 3  | 3 | 3 | 3 | 3 | 0.45489 | 1.13 | 0.98030 | 0.95 | 0.06373 | 1.32 |
| sp Q1301 CTNA2_MOUSE         | Cytoskeleton-associated protein 2 OS=Mus    | 2523.03  | 15 | 15 | 10 | 12 | 15 | 12 | 15 | 14 | 15 | 15 | 13 | 3  | 3 | 3 | 3 | 3 | 0.45489 | 1.13 | 0.98030 | 0.95 | 0.06373 | 1.32 |
| sp P1205 ARF3_MOUSE          | ADP-ribosylation factor 3 OS=Mus muscu      | 1036.16  | 15 | 15 | 12 | 18 | 17 | 18 | 10 | 10 | 17 | 9  | 12 | 3  | 3 | 3 | 3 | 3 | 0.48302 | 1.18 | 0.22646 | 0.95 | 0.74281 | 0.95 |
| sp Q17M9 HNRPO_MOUSE         | Heterogeneous nuclear ribonucleoprotein C   | 1177.21  | 14 | 13 | 10 | 14 | 13 | 14 | 12 | 8  | 10 | 13 | 8  | 9  | 3 | 3 | 3 | 3 | 0.59172 | 1.11 | 0.23084 | 0.81 | 0.46455 | 0.81 |
| sp P17777 PB_MOUSE           | Prohibitin OS=Mus musculus (Mouse) GN       | 1317.46  | 11 | 12 | 7  | 13 | 11 | 14 | 11 | 6  | 6  | 13 | 9  | 9  | 3 | 3 | 3 | 3 | 0.27957 | 1.27 | 0.33555 | 0.77 | 0.35220 | 1.03 |
| sp Q03092 TALDO_MOUSE        | Tandemly repeated domain-containing pro     | 1108.4   | 11 | 10 | 8  | 12 | 10 | 11 | 11 | 6  | 10 | 15 | 15 | 3  | 3 | 3 | 3 | 3 | 0.49309 | 1.15 | 0.26530 | 0.81 | 0.46530 | 1.00 |
| sp E9DA05 E9DA05_MOUSE       | Glycogen synthase kinase-3 beta OS=Mus      | 784.86   | 16 | 12 | 9  | 12 | 11 | 8  | 9  | 9  | 9  | 11 | 11 | 3  | 3 | 3 | 3 | 3 | 0.80381 | 1.00 | 0.22999 | 0.70 | 0.78392 | 0.84 |
| sp Q8E597 RTN3_MOUSE         | Reticulon-3 OS=Mus musculus (Mouse) GN      | 1332.27  | 14 | 13 | 10 | 17 | 9  | 15 | 10 | 8  | 12 | 7  | 7  | 3  | 3 | 3 | 3 | 3 | 0.78638 | 1.11 | 0.27844 | 0.89 | 0.16784 | 0.70 |
| sp Q8W74 VATG2_MOUSE         | V-type proton ATPase subunit G 2 OS=Mu      | 967.35   | 14 | 13 | 7  | 14 | 14 | 9  | 9  | 12 | 5  | 14 | 15 | 6  | 3 | 3 | 3 | 3 | 0.75306 | 1.12 | 0.59735 | 0.79 | 0.58789 | 1.06 |
| sp P64844 KRCB_MOUSE         | Karyopherin class beta type OS=Mus musc     | 1432.23  | 14 | 13 | 9  | 11 | 13 | 9  | 9  | 14 | 9  | 9  | 11 | 3  | 3 | 3 | 3 | 3 | 0.91610 | 1.08 | 0.53780 | 0.78 | 0.56181 | 0.78 |
| sp Q10U11 FUBP2_MOUSE        | Far upstream element-binding protein 2 OS   | 116.16   | 15 | 16 | 10 | 10 | 10 | 14 | 11 | 14 | 9  | 12 | 7  | 8  | 3 | 3 | 3 | 3 | 0.53352 | 1.09 | 0.66536 | 0.97 | 0.70523 | 0.94 |
| sp P10922 H10_MOUSE          | Histone H1.0 OS=Mus musculus (Mouse) C      | 787.24   | 18 | 11 | 9  | 17 | 9  | 5  | 19 | 6  | 7  | 13 | 13 | 6  | 3 | 3 | 3 | 3 | 0.60083 | 0.82 | 0.70288 | 0.84 | 0.87546 | 0.84 |
| sp Q191WQ3 SYCY_MOUSE        | Thyrosine-tRNA ligase, cytoplasmic OS=Mu    | 1507.15  | 13 | 11 | 8  | 9  | 14 | 17 | 15 | 16 | 12 | 8  | 11 | 3  | 3 | 3 | 3 | 3 | 0.46321 | 1.25 | 0.09475 | 1.34 | 0.89269 | 0.91 |
| sp P62897 CYC_MOUSE          | Cytochrome c, somatic OS=Mus musculus i     | 932.62   | 14 | 17 | 8  | 9  | 15 | 13 | 14 | 12 | 7  | 15 | 8  | 3  | 3 | 3 | 3 | 3 | 0.67796 | 0.95 | 0.67574 | 0.85 | 0.64514 | 0.79 |
| sp P53279 RAB5A_MOUSE        | Ras-related protein Rab-5A OS=Mus muscu     | 788.99   | 11 | 11 | 10 | 14 | 11 | 12 | 9  | 10 | 12 | 7  | 11 | 3  | 3 | 3 | 3 | 3 | 0.65309 | 1.09 | 0.66536 | 0.97 | 0.70523 | 0.94 |
| sp P28660 NCKP1_MOUSE        | Nck-associated protein 1 OS=Mus muscu       | 1811.97  | 13 | 13 | 9  | 9  | 13 | 11 | 11 | 7  | 9  | 10 | 5  | 8  | 3 | 3 | 3 | 3 | 0.44823 | 0.94 | 0.18821 | 0.77 | 0.13832 | 0.66 |
| sp P63028 TCTP_MOUSE         | Translationally-controlled tumor protein OS | 491.41   | 11 | 14 | 9  | 7  | 11 | 9  | 12 | 11 | 11 | 8  | 7  | 11 | 3 | 3 | 3 | 3 | 0.13681 | 0.79 | 0.61363 | 1.00 | 0.52199 | 0.76 |
| sp P63094 GNAS2_MOUSE        | Guanine nucleotide-binding protein G(s) su  | 704.81   | 11 | 13 | 10 | 10 | 13 | 10 | 8  | 7  | 9  | 13 | 8  | 9  | 3 | 3 | 3 | 3 | 0.42773 | 0.97 | 0.04226 | 0.71 | 0.90185 | 0.88 |
| sp P14131 RS10_MOUSE         | 40S ribosomal protein S10 OS=Mus muscu      | 856.65   | 14 | 9  | 10 | 12 | 8  | 9  | 9  | 8  | 9  | 8  | 12 | 3  | 3 | 3 | 3 | 3 | 0.18977 | 0.79 | 0.18977 | 0.79 | 0.66512 | 0.79 |
| sp P54022 RANG_MOUSE         | Ras-related protein 51A OS=Mus muscu        | 483.94   | 11 | 11 | 11 | 11 | 11 | 11 | 9  | 8  | 9  | 10 | 4  | 3  | 3 | 3 | 3 | 3 | 0.81528 | 0.93 | 0.06610 | 1.01 | 0.91270 | 0.87 |
| sp P62264 RS14_MOUSE         | 40S ribosomal protein S14 OS=Mus muscu      | 657.07   | 14 | 12 | 6  | 9  | 10 | 10 | 14 | 8  | 12 | 8  | 12 | 8  | 3 | 3 | 3 | 3 | 0.58097 | 0.91 | 0.89713 | 0.94 | 0.89713 | 0.91 |
| sp Q17291 SUCB1_MOUSE        | Succinyl-CoA ligase [ADP-forming] subunit   | 1014.48  | 11 | 11 | 9  | 7  | 9  | 6  | 10 | 8  | 9  | 10 | 6  | 8  | 3 | 3 | 3 | 3 | 0.02117 | 0.71 | 0.22328 | 0.87 | 0.21925 | 0.77 |
| sp Q17522 MAP9_MOUSE         | Microtubule-associated protein 6 OS=Mus i   | 1522.28  | 23 | 15 | 5  | 20 | 15 | 7  | 22 | 14 | 3  | 19 | 15 | 3  | 3 | 2 | 2 | 2 | 0.91269 | 0.98 | 0.90562 | 0.91 | 0.83701 | 0.79 |
| sp Q0220M UBCL2_MOUSE        | Ubiquitin carboxyl-terminal esterase (UCH   | 753.37   | 15 | 14 | 10 | 11 | 10 | 11 | 19 | 10 | 19 | 17 | 6  | 4  | 3 | 3 | 3 | 3 | 0.54171 | 1.22 | 0.84011 | 1.04 | 0.84011 | 1.04 |
| sp Q3UNH4 GRIN_MOUSE         | G-protein-regulated inducer of neurite out  | 1683.04  | 20 | 14 | 3  | 23 | 15 | 5  | 14 | 9  | 1  | 15 | 7  | 1  | 3 | 3 | 3 | 3 | 0.83374 | 1.16 | 0.56004 | 0.65 | 0.56371 | 0.62 |
| sp Q0C244 NSFC1_MOUSE        | NSFL-1 cofactor p47 OS=Mus musculus (M      | 887.46   | 12 | 11 | 3  | 9  | 12 | 6  | 11 | 6  | 6  | 8  | 4  | 3  | 3 | 3 | 3 | 3 | 0.99245 | 1.04 | 0.58894 | 0.88 | 0.75314 | 0.77 |
| sp Q17073 OTU1_MOUSE         | Ubiquitin thioesterase OTU1 OS=Mus mu       | 854.79   | 12 | 12 | 4  | 9  | 9  | 10 | 12 | 4  | 6  | 11 | 4  | 6  | 3 | 3 | 3 | 3 | 0.90031 | 1.00 | 0.61709 | 0.79 | 0.63494 | 0.75 |
| sp Q61753 SERA_MOUSE         | D-3-phosphoglycerate dehydrogenase OS       | 1248.79  | 16 | 9  | 17 | 13 | 11 | 17 | 15 | 17 | 24 | 14 | 16 | 15 | 3 | 3 | 3 | 3 | 0.83598 | 1.00 | 0.23394 | 1.37 | 0.34387 | 1.10 |
| sp Q09L01 PARK7_MOUSE        | Putative uncharacterized protein OS=Mus     | 896.13   | 10 | 10 | 11 | 13 | 15 | 19 | 11 | 7  | 10 | 13 | 6  | 4  | 3 | 3 | 3 | 3 | 0.89171 | 1.02 | 0.39137 | 0.81 | 0.89137 | 0.81 |
| sp Q0CWS0 DDAH1_MOUSE        | NG1(N)-O-dimethylarginine dimethylamino     | 1381.74  | 15 | 10 | 11 | 15 | 15 | 20 | 14 | 13 | 17 | 11 | 10 | 15 | 3 | 3 | 3 | 3 | 0.16023 | 0.39 | 0.19870 | 1.22 | 0.56376 | 1.00 |
| sp Q19V55 O91V55_MOUSE       | 40S ribosomal protein S5 OS=Mus muscu       | 1318.97  | 12 | 10 | 11 | 12 | 14 | 16 | 14 | 11 | 8  | 12 | 10 | 12 | 3 | 3 | 3 | 3 | 0.11816 | 1.27 | 0.77219 | 1.00 | 0.14778 | 1.03 |
| sp P01831 THY1_MOUSE         | Thy1 membrane glycoprotein OS=Mus mu        | 440.31   | 12 | 10 | 11 | 11 | 14 | 13 | 15 | 14 | 10 | 13 | 8  | 9  | 3 | 3 | 3 | 3 | 0.30424 | 1.15 | 0.17507 | 1.18 | 0.91233 | 0.91 |
| sp Q08Q02 Q8Q02_MOUSE        | Putative uncharacterized protein OS=Mus     | 838.02   | 10 | 10 | 10 | 12 | 13 | 9  | 11 | 7  | 10 | 13 | 9  | 10 | 3 | 3 | 3 | 3 | 0.89373 | 0.62 | 0.95375 | 0.62 | 0.95375 | 0.62 |
| sp H7B336 H7B336_MOUSE       | Serine/threonine-protein kinase DCLK1 OS    | 863.8    | 12 | 10 | 11 | 12 | 12 | 11 | 6  | 12 | 13 | 9  | 10 | 3  | 3 | 3 | 3 | 3 | 0.87306 | 1.03 | 0.52619 | 0.83 | 0.85462 | 0.91 |
| sp P61255 RL2B_MOUSE         | 60S ribosomal protein L26 OS=Mus muscu      | 914.88   | 11 | 9  | 11 | 13 | 17 | 12 | 9  | 7  | 11 | 11 | 9  | 10 | 3 | 3 | 3 | 3 | 0.11458 | 1.35 | 0.61105 | 0.87 | 0.35470 | 0.97 |
| sp Q64522 JL2A2B_MOUSE       | Histone H2A type 2-B OS=Mus musculus (f     | 371.21   | 15 | 10 | 12 | 12 | 9  | 8  | 12 | 13 | 5  | 11 | 13 | 9  | 3 | 3 | 3 | 3 | 0.22447 | 0.78 | 0.58978 | 0.81 | 0.92403 | 0.89 |
| sp Q0C228 RS19_MOUSE         | 40S ribosomal protein S19 OS=Mus muscu      | 837.16   | 15 | 13 | 10 | 9  | 13 | 15 | 17 | 10 | 13 | 10 | 13 | 3  | 3 | 3 | 3 | 3 | 0.86201 | 1.03 | 0.36749 | 1.11 | 0.15511 | 1.03 |
| sp P61585 DYL1_MOUSE         | Dynamin light chain 1, cytoplasmic OS=Mu    | 1942.05  | 9  | 11 | 10 | 11 | 10 | 10 | 14 | 9  | 10 | 12 | 13 | 3  | 3 | 3 | 3 | 3 | 0.77447 | 0.81 | 0.77447 | 0.81 | 0.77447 | 0.81 |
| sp P53994 RAB2A_MOUSE        | Ras-related protein Rab-2A OS=Mus musc      | 1010.94  | 13 | 10 | 11 | 10 | 11 | 10 | 8  | 8  | 9  | 7  | 8  | 3  | 3 | 3 | 3 | 3 | 0.21728 | 0.91 | 0.10722 | 0.74 | 0.07464 | 0.65 |
| sp P48758 CBR1_MOUSE         | Carbonyl reductase [NADPH] 1 OS=Mus m       | 921.49   | 11 | 9  | 12 | 9  | 9  | 9  | 14 | 6  | 9  | 12 | 10 | 10 | 3 | 3 | 3 | 3 | 0.13270 | 0.84 | 0.75018 | 0.91 | 0.29009 | 1.00 |
| sp Q19R14 PSPA1_MOUSE        | Proteasome subunit alpha type 1 OS=Mus      | 1016.21  | 13 | 9  | 7  | 11 | 12 | 12 | 16 | 12 | 8  | 16 | 14 | 9  | 3 | 3 | 3 | 3 | 0.45681 | 1.21 | 0.33589 | 1.24 | 0.13885 | 1.34 |
| sp P53550 PMA1_MOUSE         | Phosphatase 1 OS=Mus musculus (Mouse)       | 830.76   | 14 | 13 | 10 | 11 | 11 | 13 | 13 | 10 | 11 | 13 | 11 | 10 | 3 | 3 | 3 | 3 | 0.84211 | 1.08 | 0.42216 | 0.91 | 0.42216 | 0.91 |
| sp P11448 RL7_MOUSE          | 60S ribosomal protein L7 OS=Mus muscu       | 969.79   | 11 | 10 | 10 | 17 | 13 | 12 | 13 | 7  | 8  | 16 | 7  | 6  | 3 | 3 | 3 | 3 | 0.18312 | 1.35 | 0.65654 | 0.90 | 0.94176 | 0.94 |
| sp P10852 4F2_MOUSE          | 4F2 cell-surface antigen heavy chain OS=    | 1166.06  | 11 | 8  | 9  | 11 | 13 | 13 | 16 | 10 | 8  | 12 | 10 | 10 | 3 | 3 | 3 | 3 | 0.08202 | 1.32 | 0.31377 | 1.21 | 0.03588 | 1.14 |
| sp P62242 RS8_MOUSE          | 40S ribosomal protein S8 OS=Mus muscu       | 930.13</ |    |    |    |    |    |    |    |    |    |    |    |    |   |   |   |   |         |      |         |      |         |      |

|                      |                                              |                              |         |    |    |    |    |    |    |    |    |    |    |    |    |   |   |   |   |         |      |         |      |         |      |
|----------------------|----------------------------------------------|------------------------------|---------|----|----|----|----|----|----|----|----|----|----|----|----|---|---|---|---|---------|------|---------|------|---------|------|
| tfE907C9E907C9_MOUSE | Kinesin light chain 1                        | OS-Mus musculus (M           | 1625.7  | 8  | 7  | 8  | 11 | 10 | 11 | 7  | 4  | 6  | 9  | 5  | 8  | 3 | 3 | 3 | 3 | 0.03009 | 1.39 | 0.10120 | 0.74 | 0.66842 | 0.96 |
| tfQ3U8V9Q3U8V_MOUSE  | Putative uncharacterized protein             | OS-Mus                       | 977.81  | 9  | 9  | 10 | 11 | 9  | 9  | 10 | 7  | 8  | 7  | 6  | 8  | 3 | 3 | 3 | 3 | 0.94588 | 1.04 | 0.39827 | 0.89 | 0.49597 | 0.82 |
| tfQ3J29J9M29J_MOUSE  | Hydroxyethylglutaryl-CoA synthase, cytopl    | OS-Mus                       | 1677.67 | 9  | 10 | 8  | 12 | 13 | 6  | 12 | 9  | 9  | 10 | 9  | 3  | 3 | 3 | 3 | 3 | 0.25149 | 1.44 | 0.33597 | 1.24 | 0.18425 | 1.12 |
| tfQ3N15N15N15_MOUSE  | Spirosome RNA helicase Ddx3b                 | OS-M                         | 920.49  | 9  | 7  | 7  | 8  | 12 | 13 | 8  | 8  | 7  | 11 | 8  | 6  | 3 | 3 | 3 | 3 | 0.12455 | 1.44 | 0.25607 | 1.17 | 0.04375 | 1.17 |
| tfQ3JKK7TMO2D_MOUSE  | Tropomodulin-2                               | OS-Mus musculus (M           | 866.17  | 9  | 9  | 9  | 9  | 11 | 11 | 11 | 6  | 6  | 7  | 11 | 8  | 3 | 3 | 3 | 3 | 0.11764 | 1.15 | 0.55312 | 0.89 | 0.07950 | 1.00 |
| tfB8Q34B8Q34_MOUSE   | Liprin-alpha 2                               | OS-Mus musculus (Mouse)      | 1425.91 | 10 | 6  | 7  | 6  | 13 | 11 | 9  | 6  | 5  | 4  | 5  | 3  | 3 | 3 | 3 | 3 | 0.46315 | 1.30 | 0.64959 | 0.87 | 0.10697 | 0.52 |
| tfP46638R1B_MOUSE    | Ras-related protein Rab-11B                  | OS-Mus mus                   | 872.32  | 6  | 8  | 7  | 7  | 12 | 16 | 7  | 3  | 6  | 6  | 3  | 5  | 3 | 3 | 3 | 3 | 0.13890 | 1.57 | 0.28277 | 0.76 | 0.44069 | 0.76 |
| tfP6R64Q6R1P_MOUSE   | SH3 domain protein 1                         | OS-Mus muscu                 | 1000.63 | 9  | 7  | 7  | 7  | 12 | 16 | 6  | 5  | 6  | 7  | 9  | 1  | 3 | 3 | 3 | 3 | 0.19635 | 1.28 | 0.29822 | 0.88 | 0.17628 | 0.28 |
| tfQ3Y1WVSHL3_MOUSE   | SH3 domain-binding glutamic acid-rich f      | OS-Mus muscu                 | 281.31  | 7  | 6  | 7  | 8  | 11 | 9  | 11 | 3  | 3  | 2  | 1  | 3  | 3 | 3 | 3 | 3 | 0.04128 | 1.40 | 0.82924 | 1.05 | 0.41075 | 0.65 |
| tfQ3C9R8UCUR_MOUSE   | Cytochrome b-c1 complex subunit Rheska       | OS-Mus muscu                 | 660.91  | 7  | 7  | 7  | 10 | 11 | 10 | 7  | 11 | 4  | 11 | 6  | 5  | 3 | 3 | 3 | 3 | 0.00036 | 1.08 | 0.74868 | 1.05 | 0.50608 | 1.05 |
| tfQ3Y1L3Q3Y1L_MOUSE  | Putative uncharacterized protein             | OS-Mus                       | 908.14  | 10 | 9  | 6  | 8  | 11 | 7  | 10 | 9  | 12 | 10 | 5  | 8  | 3 | 3 | 3 | 3 | 0.96274 | 1.04 | 0.17582 | 1.24 | 0.89886 | 0.92 |
| tfE3K6Q4E3K6Q_MOUSE  | Protein Rsp19                                | OS-Mus muscu                 | 1962.38 | 9  | 7  | 7  | 7  | 12 | 16 | 6  | 5  | 6  | 7  | 9  | 3  | 3 | 3 | 3 | 3 | 0.79031 | 1.14 | 0.60302 | 0.82 | 0.60302 | 0.62 |
| tfP9394QLOOC_MOUSE   | Transcription elongation factor B polypept   | OS-Mus muscu                 | 611.13  | 7  | 8  | 7  | 6  | 11 | 9  | 9  | 7  | 7  | 10 | 4  | 9  | 3 | 3 | 3 | 3 | 0.49667 | 1.18 | 0.07943 | 1.05 | 0.54595 | 1.05 |
| tfP6074RAC3_MOUSE    | Ras-related G3 botulinum toxin substrate 3   | OS-Mus muscu                 | 619.83  | 9  | 9  | 10 | 9  | 12 | 10 | 8  | 7  | 6  | 8  | 5  | 6  | 3 | 3 | 3 | 3 | 0.55849 | 1.11 | 0.03304 | 0.75 | 0.03304 | 0.68 |
| tfQ8X04P42B_MOUSE    | Phosphatidylinositol 5-ophosphate 4-kinase I | OS-Mus muscu                 | 915.03  | 7  | 9  | 9  | 9  | 12 | 10 | 6  | 7  | 5  | 9  | 7  | 10 | 3 | 3 | 3 | 3 | 0.15907 | 1.24 | 0.13060 | 0.72 | 0.28911 | 1.04 |
| tfQ3C0W7ISNAG_MOUSE  | Gamma-tubulin NSF attachment protein         | OS-Mus muscu                 | 1004.96 | 9  | 8  | 8  | 8  | 12 | 9  | 8  | 8  | 5  | 9  | 5  | 6  | 3 | 3 | 3 | 3 | 0.42562 | 1.21 | 0.89036 | 0.88 | 0.67119 | 0.83 |
| tfQ8R01G2PLK4_MOUSE  | Plexin-A4                                    | OS-Mus musculus (GN=         | 1900.63 | 6  | 6  | 10 | 11 | 6  | 8  | 8  | 8  | 5  | 6  | 13 | 6  | 3 | 3 | 3 | 3 | 0.82224 | 1.18 | 0.09224 | 0.73 | 0.61696 | 1.09 |
| tfQ8BH2QFA49A_MOUSE  | Protein FAM9A                                | OS-Mus musculus (M           | 928.63  | 10 | 10 | 9  | 8  | 12 | 6  | 5  | 6  | 6  | 8  | 5  | 4  | 3 | 3 | 3 | 3 | 0.40123 | 0.90 | 0.00676 | 0.59 | 0.02444 | 0.59 |
| tfQ3C0C2CY858_MOUSE  | Cytochrome b5 type B                         | OS-Mus musculus (            | 521.9   | 10 | 7  | 9  | 11 | 9  | 3  | 7  | 7  | 5  | 5  | 7  | 3  | 3 | 3 | 3 | 3 | 0.54337 | 1.12 | 0.24389 | 0.65 | 0.15030 | 0.65 |
| tfQ3Z2Q6SEPT5_MOUSE  | Septin-5                                     | OS-Mus musculus (Mouse) GN=F | 981.84  | 10 | 8  | 9  | 7  | 13 | 6  | 5  | 4  | 7  | 5  | 7  | 5  | 3 | 3 | 3 | 3 | 0.90908 | 1.04 | 0.02553 | 0.99 | 0.12812 | 0.63 |
| tfQ3R795GLQ2_MOUSE   | Glycosylase 2 subunit beta                   | OS-Mus muscu                 | 632.29  | 8  | 7  | 8  | 7  | 11 | 11 | 9  | 11 | 7  | 4  | 6  | 3  | 3 | 3 | 3 | 3 | 0.45534 | 1.18 | 0.00727 | 1.41 | 0.27677 | 0.77 |
| tfQ3U561Q3U56_MOUSE  | Ribosomal protein OS-Mus musculus (M         | OS-Mus muscu                 | 506.04  | 9  | 6  | 8  | 10 | 9  | 12 | 14 | 7  | 9  | 9  | 7  | 4  | 3 | 3 | 3 | 3 | 0.18174 | 1.35 | 0.22600 | 1.30 | 0.88787 | 0.87 |
| tfP32921SYWC_MOUSE   | Tytophan-tRNA ligase, cytoplasmic OS=F       | OS-Mus muscu                 | 1291.1  | 9  | 8  | 8  | 8  | 9  | 12 | 10 | 8  | 6  | 11 | 9  | 7  | 3 | 3 | 3 | 3 | 0.46071 | 1.16 | 0.95856 | 0.96 | 0.12671 | 1.08 |
| tfP70333HNRH2_MOUSE  | Heterogeneous nuclear ribonucleoprotein H    | OS-Mus muscu                 | 794.72  | 10 | 8  | 8  | 8  | 11 | 10 | 8  | 10 | 8  | 7  | 10 | 3  | 3 | 3 | 3 | 3 | 0.95496 | 1.04 | 0.28996 | 1.04 | 0.71145 | 0.93 |
| tfQ3D176RRL3_MOUSE   | 60S ribosomal protein L34                    | OS-Mus muscu                 | 383.21  | 10 | 9  | 6  | 6  | 10 | 6  | 7  | 9  | 7  | 9  | 8  | 3  | 3 | 3 | 3 | 3 | 0.62847 | 0.92 | 0.78970 | 0.88 | 0.62599 | 0.96 |
| tfQ3R328PSPC1_MOUSE  | Alpha-tubulin class III                      | OS-Mus muscu                 | 737.35  | 9  | 7  | 7  | 7  | 12 | 9  | 9  | 16 | 9  | 4  | 7  | 3  | 3 | 3 | 3 | 3 | 0.9395  | 1.36 | 0.11582 | 1.23 | 0.25965 | 0.73 |
| tfQ3TQ5Q3TQ5_MOUSE   | Putative uncharacterized protein             | OS-Mus                       | 611.52  | 9  | 6  | 6  | 8  | 7  | 11 | 8  | 6  | 9  | 4  | 4  | 7  | 3 | 3 | 3 | 3 | 0.46098 | 1.24 | 0.48217 | 1.10 | 0.48807 | 0.71 |
| tfP62823RAB3C_MOUSE  | Ras-related protein Rab-3C                   | OS-Mus muscu                 | 599.69  | 10 | 9  | 8  | 8  | 10 | 8  | 12 | 12 | 12 | 8  | 5  | 7  | 3 | 3 | 3 | 3 | 0.35335 | 0.93 | 0.00423 | 1.33 | 0.15063 | 0.74 |
| tfQ3C91VATG1_MOUSE   | V-type proton ATPase subunit G1              | OS-Mus muscu                 | 959.97  | 9  | 8  | 6  | 8  | 9  | 9  | 13 | 12 | 8  | 9  | 9  | 4  | 3 | 3 | 3 | 3 | 0.51239 | 1.13 | 0.07910 | 1.43 | 0.77857 | 0.96 |
| tfP3484HIF_MOUSE     | Hydroxy-methylglutaryl-CoA lyase             | OS-Mus muscu                 | 554.31  | 10 | 9  | 7  | 7  | 10 | 10 | 16 | 9  | 11 | 15 | 8  | 3  | 3 | 3 | 3 | 3 | 0.19350 | 1.05 | 0.22055 | 1.05 | 0.22055 | 1.05 |
| tfQ3E167DDX3_MOUSE   | ATP-dependent RNA helicase DDX3              | OS-Mus muscu                 | 1413.91 | 9  | 9  | 8  | 7  | 10 | 10 | 14 | 7  | 14 | 7  | 10 | 10 | 3 | 3 | 3 | 3 | 0.88121 | 1.04 | 0.30516 | 1.23 | 0.37675 | 1.04 |
| tfQ3Z204HNRFC_MOUSE  | Heterogeneous nuclear ribonucleoproteins     | OS-Mus muscu                 | 1016.32 | 9  | 7  | 7  | 8  | 7  | 8  | 15 | 8  | 8  | 13 | 8  | 8  | 3 | 3 | 3 | 3 | 0.72036 | 1.00 | 0.18637 | 1.35 | 0.67069 | 1.26 |
| tfQ3C9C1COX6_MOUSE   | Cytochrome c oxidase subunit 6C              | OS-Mus muscu                 | 422.45  | 9  | 6  | 7  | 10 | 10 | 10 | 14 | 10 | 7  | 11 | 10 | 6  | 3 | 3 | 3 | 3 | 0.09360 | 1.36 | 0.14574 | 1.41 | 0.20479 | 1.23 |
| tfQ3E0C3VFS3_MOUSE   | Vacuolar protein sorting-associated protein  | OS-Mus muscu                 | 1667.53 | 9  | 7  | 9  | 9  | 8  | 9  | 11 | 4  | 9  | 8  | 8  | 4  | 3 | 3 | 3 | 3 | 0.35081 | 0.92 | 0.97748 | 0.96 | 0.64956 | 0.80 |
| tfP70372ELAV1_MOUSE  | ELAV-like protein L26                        | OS-Mus muscu                 | 554.31  | 9  | 7  | 7  | 7  | 10 | 10 | 12 | 5  | 6  | 3  | 4  | 2  | 3 | 3 | 3 | 3 | 0.00194 | 1.08 | 0.49437 | 1.28 | 0.19487 | 0.72 |
| tfQ4L64Q4L64_MOUSE   | AMPA-selective glutamate receptor 2 flip ty  | OS-Mus muscu                 | 1267.62 | 6  | 6  | 6  | 6  | 6  | 6  | 12 | 2  | 3  | 11 | 2  | 3  | 3 | 3 | 3 | 3 | 0.46458 | 1.17 | 0.90406 | 0.94 | 0.66708 | 0.72 |
| tfQ3JKD3SCAMS_MOUSE  | Secretory carrier-associated membrane prot   | OS-Mus muscu                 | 181.08  | 8  | 8  | 8  | 7  | 8  | 7  | 9  | 11 | 9  | 7  | 8  | 8  | 3 | 3 | 3 | 3 | 0.01634 | 0.92 | 0.12507 | 1.21 | 0.45427 | 0.96 |
| tfP12382PFKAL_MOUSE  | ATP-dependent 6-phosphofruktokinase, liv     | OS-Mus muscu                 | 864.56  | 7  | 6  | 9  | 7  | 9  | 8  | 6  | 11 | 10 | 3  | 4  | 8  | 3 | 3 | 3 | 3 | 0.83582 | 1.09 | 0.38712 | 1.23 | 0.51125 | 0.68 |
| tfQ3E93Q3E93_MOUSE   | MG9927                                       | OS-Mus musculus (Mouse) GN=  | 506.04  | 7  | 8  | 7  | 7  | 10 | 10 | 9  | 9  | 11 | 8  | 5  | 7  | 3 | 3 | 3 | 3 | 0.32074 | 1.04 | 0.07025 | 1.26 | 0.10765 | 0.87 |
| tfQ3Q0Z0EIF3_MOUSE   | Eukaryotic translation initiation factor 3   | OS-Mus muscu                 | 579.98  | 8  | 8  | 6  | 7  | 10 | 10 | 9  | 9  | 7  | 9  | 8  | 8  | 3 | 3 | 3 | 3 | 0.49691 | 1.17 | 0.36252 | 1.00 | 0.35638 | 1.04 |
| tfQ8B6G8PHL2_MOUSE   | Phytanoyl-CoA hydroxylase-interacting prot   | OS-Mus muscu                 | 707.6   | 8  | 8  | 8  | 8  | 7  | 10 | 6  | 9  | 7  | 6  | 8  | 8  | 3 | 3 | 3 | 3 | 0.96958 | 1.04 | 0.91928 | 0.92 | 0.74401 | 0.92 |
| tfQ3J20Q3J20_MOUSE   | 14-3-3 protein sigma                         | OS-Mus musculus (M           | 385.59  | 10 | 10 | 9  | 8  | 8  | 8  | 6  | 9  | 6  | 7  | 8  | 9  | 3 | 3 | 3 | 3 | 0.05327 | 0.86 | 0.19971 | 0.72 | 0.69181 | 0.83 |
| tfQ3U8Y7Q3U8Y_MOUSE  | Putative uncharacterized protein             | OS-Mus                       | 1150.27 | 6  | 8  | 8  | 7  | 8  | 8  | 8  | 6  | 9  | 6  | 7  | 8  | 3 | 3 | 3 | 3 | 0.64801 | 1.10 | 0.42544 | 1.10 | 0.42256 | 1.00 |
| tfP41105R2L_MOUSE    | 60S ribosomal protein L26                    | OS-Mus muscu                 | 390.26  | 9  | 10 | 9  | 7  | 10 | 10 | 10 | 9  | 8  | 9  | 8  | 3  | 3 | 3 | 3 | 3 | 0.54005 | 0.97 | 0.08084 | 0.89 | 0.16618 | 0.72 |
| tfQ3E127ADBP_MOUSE   | TAR DNA-binding protein 43                   | OS-Mus muscu                 | 920.33  | 10 | 8  | 6  | 9  | 8  | 10 | 6  | 9  | 9  | 6  | 8  | 3  | 3 | 3 | 3 | 3 | 0.31669 | 0.96 | 0.02970 | 1.13 | 0.39274 | 0.96 |
| tfQ89L4FRTCC_MOUSE   | tRNA-spirosome ligase RbcB homolog           | OS-Mus muscu                 | 719.5   | 7  | 8  | 6  | 7  | 9  | 9  | 7  | 8  | 8  | 10 | 5  | 8  | 3 | 3 | 3 | 3 | 0.19913 | 1.19 | 0.25718 | 1.10 | 0.28601 | 1.10 |
| tfQ3Q901PSB1_MOUSE   | Proteasome subunit beta type-1               | OS-Mus                       | 848.16  | 7  | 10 | 8  | 7  | 7  | 9  | 10 | 6  | 8  | 7  | 5  | 7  | 3 | 3 | 3 | 3 | 0.36350 | 0.92 | 0.97229 | 0.96 | 0.22616 | 0.76 |
| tfP3032RST_MOUSE     | 40S ribosomal protein S7                     | OS-Mus muscu                 | 504.06  | 7  | 9  | 7  | 6  | 9  | 9  | 9  | 10 | 8  | 6  | 5  | 7  | 3 | 3 | 3 | 3 | 0.97416 | 1.05 | 0.07165 | 1.26 | 0.37765 | 0.87 |
| tfQ8BUV3GEFH_MOUSE   | Gephyrin                                     | OS-Mus musculus (Mouse) GN=F | 735.52  | 9  | 10 | 6  | 9  | 8  | 8  | 8  | 7  | 8  | 8  | 5  | 5  | 3 | 3 | 3 | 3 | 0.80713 | 1.00 | 0.87028 | 0.92 | 0.25499 | 0.72 |
| tfQ3E2W3JRL10_MOUSE  | 60S ribosomal protein L10                    | OS-Mus muscu                 | 580.75  | 9  | 7  | 7  | 10 | 9  | 9  | 7  | 9  | 6  | 4  | 10 | 6  | 3 | 3 | 3 | 3 | 0.24937 | 1.22 | 0.98286 | 0.96 | 0.95868 | 0.87 |
| tfP8E5U4SYG1_MOUSE   | Ras/Rap GTPase-activating protein SynGAP     | OS-Mus muscu                 | 1116.16 |    |    |    |    |    |    |    |    |    |    |    |    |   |   |   |   |         |      |         |      |         |      |

|                            |                                                |        |         |     |    |    |    |    |    |    |    |    |    |    |   |   |   |   |   |         |      |         |      |         |      |
|----------------------------|------------------------------------------------|--------|---------|-----|----|----|----|----|----|----|----|----|----|----|---|---|---|---|---|---------|------|---------|------|---------|------|
| sp Q810U4 NRCAM_MOUSE      | Neuronal cell adhesion molecule                | OS=Mus | 756.47  | 8   | 5  | 5  | 9  | 6  | 8  | 7  | 9  | 10 | 3  | 6  | 8 | 3 | 3 | 3 | 3 | 0.40961 | 1.28 | 0.12693 | 1.44 | 0.79157 | 0.94 |
| sp Q9918D DDAH2_MOUSE      | NG(10C)-dimethylarginine dimethylaminohy       | OS=Mus | 822.33  | 7   | 3  | 4  | 8  | 8  | 9  | 5  | 6  | 9  | 6  | 4  | 9 | 3 | 3 | 3 | 3 | 0.06429 | 1.79 | 0.27530 | 1.43 | 0.30967 | 1.36 |
| sp Q9WV02 RBMX_MOUSE       | RNA-binding motif protein X chromosome 1       | OS=Mus | 584.85  | 10  | 5  | 6  | 10 | 6  | 9  | 9  | 6  | 8  | 15 | 4  | 3 | 3 | 3 | 3 | 3 | 0.51458 | 1.25 | 0.49655 | 1.16 | 0.49655 | 0.90 |
| sp Q1VA93 QAVAR3_MOUSE     | Protein kinase C OS=Mus musculus               | OS=Mus | 1253.63 | 8   | 4  | 5  | 6  | 8  | 4  | 1  | 7  | 7  | 4  | 4  | 5 | 5 | 3 | 3 | 3 | 0.99184 | 1.06 | 0.95356 | 0.88 | 0.82874 | 0.82 |
| sp P61089 UBE2N_MOUSE      | Ubiquitin-conjugating enzyme E2 N OS=M         | OS=M   | 621.57  | 6   | 4  | 5  | 7  | 3  | 4  | 7  | 6  | 5  | 5  | 3  | 3 | 3 | 3 | 3 | 3 | 0.75563 | 0.93 | 0.16532 | 1.20 | 0.29433 | 0.73 |
| sp Q3JHU0 AAK1_MOUSE       | AP2-associated protein kinase 1 OS=Mus         | OS=M   | 1032.19 | 7   | 3  | 3  | 6  | 3  | 3  | 7  | 3  | 1  | 6  | 3  | 2 | 3 | 3 | 3 | 3 | 0.80219 | 0.92 | 0.77592 | 0.85 | 0.85990 | 0.85 |
| sp E9PVC5 EPFV2_MOUSE      | Eukaryotic translation initiation factor 4 gam | OS=M   | 1335.39 | 7   | 5  | 3  | 8  | 5  | 5  | 3  | 8  | 9  | 4  | 2  | 3 | 3 | 3 | 3 | 3 | 0.64908 | 1.20 | 0.51140 | 1.13 | 0.85584 | 1.00 |
| sp Q8KCS5 IFP2_MOUSE       | Interferon-gamma OS=Mus musculus               | OS=M   | 1421.24 | 6   | 3  | 6  | 3  | 6  | 3  | 2  | 4  | 3  | 14 | 2  | 3 | 3 | 3 | 3 | 3 | 0.48124 | 1.36 | 0.29232 | 1.07 | 0.48124 | 0.73 |
| sp I4A0G2 DNT1 A0A0G2.DJNT | Microtubule-associated protein OS=Mus m        | OS=M   | 956.66  | 8   | 3  | 2  | 10 | 4  | 1  | 14 | 3  | 1  | 1  | 10 | 2 | 1 | 3 | 3 | 3 | 0.87299 | 1.15 | 0.72488 | 1.38 | 0.56288 | 1.00 |
| sp Q782A7 NP1L4_MOUSE      | Nucleosome assembly protein 1-like 4 OS=       | OS=M   | 839.15  | 10  | 4  | 4  | 4  | 5  | 12 | 8  | 13 | 8  | 9  | 7  | 8 | 6 | 3 | 3 | 3 | 0.52901 | 1.39 | 0.12202 | 1.67 | 0.43071 | 1.17 |
| sp Q90YF9 NDRG3_MOUSE      | Protein NDRG3 OS=Mus musculus                  | OS=M   | 838.63  | 7   | 3  | 2  | 5  | 7  | 6  | 6  | 6  | 2  | 4  | 7  | 3 | 3 | 3 | 3 | 3 | 0.34705 | 1.50 | 0.68990 | 1.17 | 0.58963 | 1.17 |
| sp Q9C1W1 PAK2_MOUSE       | Protein kinase PAK2 OS=Mus musculus            | OS=M   | 814.44  | 6   | 4  | 3  | 2  | 10 | 4  | 4  | 4  | 3  | 7  | 4  | 4 | 1 | 4 | 3 | 3 | 0.42514 | 1.46 | 0.52737 | 1.01 | 0.52737 | 1.15 |
| sp Q9C2D3 SYG_MOUSE        | Glycine-tRNA synthetase OS=Mus musculus (M     | OS=M   | 1210.6  | 10  | 3  | 3  | 5  | 9  | 6  | 5  | 6  | 6  | 6  | 6  | 4 | 3 | 3 | 3 | 3 | 0.72898 | 1.25 | 0.79295 | 1.06 | 0.79647 | 1.00 |
| sp P62334 PRS1_MOUSE       | 26S proteasome regulatory subunit 10B OS=      | OS=M   | 833.39  | 6   | 3  | 4  | 2  | 7  | 9  | 3  | 6  | 7  | 5  | 6  | 7 | 3 | 3 | 3 | 3 | 0.57927 | 1.38 | 0.16486 | 1.23 | 0.13410 | 1.38 |
| sp P59999 ARPC4_MOUSE      | Actin-related protein 2/3 complex subunit 4    | OS=M   | 553.91  | 7   | 4  | 4  | 5  | 6  | 8  | 4  | 6  | 5  | 3  | 5  | 7 | 3 | 3 | 3 | 3 | 0.47486 | 1.27 | 0.80741 | 1.00 | 0.68531 | 1.00 |
| sp P80033 PDIM4_MOUSE      | Protein disulfide-isomerase A4 OS=Mus m        | OS=M   | 1108.01 | 6   | 5  | 5  | 7  | 7  | 5  | 5  | 3  | 3  | 6  | 2  | 4 | 3 | 3 | 3 | 3 | 0.28116 | 1.36 | 0.44407 | 0.79 | 0.53661 | 0.86 |
| sp Q9E125 P1B3_MOUSE       | Platelet-activating factor acetylhydrolase IB  | OS=M   | 449.77  | 6   | 9  | 7  | 7  | 7  | 7  | 5  | 3  | 3  | 5  | 4  | 4 | 3 | 3 | 3 | 3 | 0.78943 | 0.85 | 0.40937 | 0.65 | 0.69270 | 0.71 |
| sp Q90972 RBBP4_MOUSE      | Histone-binding protein RBBP4 OS=Mus m         | OS=M   | 418.74  | 6   | 5  | 4  | 4  | 8  | 5  | 7  | 3  | 6  | 7  | 2  | 5 | 3 | 3 | 3 | 3 | 0.51012 | 1.31 | 0.44745 | 1.23 | 0.66519 | 1.08 |
| sp Q86814 SAH3_MOUSE       | Putative adenosylhomocysteinase 3 OS=N         | OS=N   | 593.99  | 6   | 5  | 4  | 4  | 7  | 4  | 6  | 4  | 1  | 5  | 4  | 1 | 3 | 3 | 3 | 3 | 0.80261 | 1.00 | 0.45649 | 0.73 | 0.40058 | 0.67 |
| sp Q8CA77 POM2L_MOUSE      | Glucose 1,6-bisphosphate synthase OS=N         | OS=N   | 1292.91 | 6   | 2  | 5  | 5  | 8  | 4  | 6  | 1  | 5  | 4  | 1  | 4 | 3 | 3 | 3 | 3 | 0.57170 | 1.31 | 0.89297 | 0.92 | 0.55408 | 0.69 |
| sp Q90145 SC2A_MOUSE       | Protein transposon protein Scs2A OS=Mus m      | OS=M   | 1044.28 | 5   | 5  | 5  | 8  | 5  | 3  | 2  | 5  | 5  | 6  | 2  | 7 | 3 | 3 | 3 | 3 | 0.71440 | 1.13 | 0.16286 | 0.63 | 0.89763 | 0.94 |
| sp Q9CR16 PP1D_MOUSE       | Protein phosphatase 1 delta OS=Mus muscu       | OS=M   | 757.83  | 6   | 5  | 4  | 5  | 7  | 5  | 5  | 5  | 3  | 7  | 4  | 5 | 3 | 3 | 3 | 3 | 0.63503 | 1.13 | 0.65698 | 0.87 | 0.30679 | 1.07 |
| sp Q62318 TIF1_MOUSE       | Transcription intermediary factor 1-beta OS=   | OS=M   | 905.66  | 6   | 2  | 3  | 5  | 6  | 6  | 6  | 4  | 2  | 4  | 2  | 4 | 3 | 3 | 3 | 3 | 0.93596 | 1.00 | 0.79313 | 1.09 | 0.97890 | 0.91 |
| sp Q8BMS1 ECH3_MOUSE       | Triphunctional enzyme subunit alpha, mitoch    | OS=M   | 1784.76 | 6   | 4  | 4  | 5  | 5  | 6  | 11 | 6  | 7  | 5  | 4  | 7 | 3 | 3 | 3 | 3 | 0.61492 | 1.14 | 0.04724 | 1.71 | 0.34676 | 1.14 |
| sp Q9D019 SYRC_MOUSE       | Arginine-tRNA ligase, cytoplasmic OS=Mus       | OS=M   | 988.11  | 6   | 4  | 3  | 4  | 5  | 7  | 9  | 6  | 7  | 6  | 7  | 6 | 7 | 3 | 3 | 3 | 0.97214 | 1.07 | 0.24156 | 1.27 | 0.18491 | 1.33 |
| sp Q9JUL0 GPD1L_MOUSE      | Glycerol-3-phosphate dehydrogenase 1-like      | OS=M   | 874.24  | 5   | 5  | 5  | 4  | 8  | 9  | 6  | 2  | 6  | 2  | 5  | 3 | 3 | 3 | 3 | 3 | 0.70383 | 0.80 | 0.66659 | 0.89 | 0.65439 | 0.88 |
| sp Q91WU8 FUBP1_MOUSE      | Far upstream element-binding protein 1 OS=     | OS=M   | 855.56  | 6   | 5  | 2  | 2  | 4  | 7  | 2  | 2  | 5  | 3  | 5  | 3 | 3 | 3 | 3 | 3 | 0.90836 | 1.00 | 0.54244 | 0.69 | 0.55387 | 0.62 |
| sp Q9VM18 IRG_MOUSE        | Immunity-related GTPase family C protein 1     | OS=M   | 55.57   | 6   | 3  | 3  | 4  | 3  | 3  | 5  | 6  | 2  | 4  | 3  | 2 | 3 | 3 | 3 | 3 | 0.50636 | 0.83 | 0.75185 | 1.08 | 0.59327 | 0.75 |
| sp Q9T7M8 HUME1_MOUSE      | E3 ubiquitin-protein ligase HUME1 OS=Mus       | OS=M   | 921.66  | 6   | 3  | 2  | 4  | 5  | 3  | 3  | 4  | 4  | 4  | 6  | 4 | 3 | 3 | 3 | 3 | 0.91900 | 1.09 | 0.85612 | 1.00 | 0.45633 | 1.18 |
| sp Q9NZL0 SOG3_MOUSE       | Protein SOD3 OS=Mus musculus                   | OS=M   | 659.78  | 6   | 3  | 2  | 10 | 4  | 4  | 4  | 4  | 2  | 4  | 3  | 2 | 3 | 3 | 3 | 3 | 0.98834 | 1.07 | 0.79968 | 0.72 | 0.58218 | 1.14 |
| sp Q9BFZ9 ERLN2_MOUSE      | Erlin-2 OS=Mus musculus (Mouse) GN-Erlin       | OS=M   | 659.78  | 8   | 4  | 4  | 4  | 4  | 4  | 4  | 4  | 4  | 3  | 4  | 6 | 3 | 3 | 3 | 3 | 0.32705 | 0.75 | 0.46781 | 0.75 | 0.88226 | 0.81 |
| sp Q9ZZW0 DNPEP_MOUSE      | Aspartyl aminopeptidase OS=Mus musculus        | OS=M   | 865.13  | 7   | 2  | 4  | 2  | 5  | 4  | 4  | 4  | 4  | 4  | 4  | 4 | 3 | 3 | 3 | 3 | 0.60946 | 0.85 | 0.93544 | 0.92 | 0.89223 | 0.85 |
| sp Q9WU33 PYGM_MOUSE       | Glycogen phosphorylase, muscle form OS=        | OS=M   | 503.23  | 6   | 4  | 2  | 3  | 4  | 2  | 3  | 3  | 2  | 2  | 2  | 6 | 3 | 3 | 3 | 3 | 0.42000 | 0.75 | 0.52666 | 0.75 | 0.34944 | 0.58 |
| sp G9UX33 CSXK3_MOUSE      | Sialoprotein reductase OS=Mus musculus (I      | OS=M   | 675.57  | 6   | 2  | 3  | 4  | 5  | 4  | 1  | 3  | 6  | 2  | 2  | 6 | 3 | 3 | 3 | 3 | 0.74521 | 1.18 | 0.98457 | 0.91 | 0.93872 | 0.91 |
| sp Q9V8F8 STUM_MOUSE       | Protein stem homolog OS=Mus musculus (I        | OS=M   | 185.28  | 6   | 2  | 3  | 5  | 8  | 6  | 4  | 3  | 3  | 3  | 2  | 4 | 3 | 3 | 3 | 3 | 0.40778 | 0.94 | 0.33287 | 0.82 | 0.82833 | 0.88 |
| sp P35762 CDB1_MOUSE       | CDB1 antigen OS=Mus musculus (Mouse) I         | OS=M   | 275.93  | 6   | 2  | 1  | 4  | 4  | 4  | 7  | 3  | 2  | 5  | 3  | 3 | 3 | 3 | 3 | 3 | 0.62538 | 1.33 | 0.62583 | 1.33 | 0.96198 | 0.89 |
| sp Q9JKC8 CEND1_MOUSE      | Cell cycle exit and neuronal differentiation p | OS=M   | 577.39  | 6   | 4  | 2  | 13 | 5  | 1  | 8  | 1  | 9  | 1  | 9  | 1 | 2 | 2 | 2 | 2 | 0.58580 | 1.73 | 0.82441 | 0.82 | 0.94748 | 0.91 |
| sp P63040 CPLX1_MOUSE      | Complexin-1 OS=Mus musculus (Mouse) G          | OS=M   | 253.75  | 7   | 5  | 5  | 7  | 8  | 11 | 1  | 4  | 5  | 2  | 4  | 5 | 2 | 2 | 2 | 2 | 0.96902 | 1.00 | 0.47209 | 1.67 | 0.84614 | 0.75 |
| sp A2AGT5 CKAP5_MOUSE      | Cytoskeleton-associated protein 5 OS=Mus m     | OS=M   | 1027.57 | 6   | 3  | 3  | 5  | 2  | 2  | 9  | 3  | 2  | 2  | 2  | 1 | 2 | 3 | 3 | 3 | 0.82776 | 0.91 | 0.28776 | 0.73 | 0.62123 | 0.64 |
| sp P56959 FUS_MOUSE        | RNA-binding protein FUS OS=Mus musculus        | OS=M   | 575.79  | 6   | 1  | 4  | 1  | 1  | 6  | 1  | 1  | 4  | 3  | 2  | 2 | 2 | 2 | 2 | 2 | 0.77557 | 1.00 | 0.97908 | 1.00 | 0.92617 | 1.00 |
| sp Q9A065 CE170_MOUSE      | Centromeres protein of 170 kDa OS=Mus m        | OS=M   | 958.98  | 9   | 1  | 9  | 4  | 1  | 5  | 3  | 2  | 6  | 1  | 2  | 3 | 2 | 2 | 2 | 2 | 0.76521 | 1.40 | 0.98105 | 1.00 | 0.78958 | 0.70 |
| sp E0CZ72 ECC27_MOUSE      | Kinesin-like protein OS=Mus musculus (Mo       | OS=M   | 1448.5  | 5   | 14 | 11 | 11 | 14 | 12 | 10 | 7  | 9  | 12 | 10 | 8 | 3 | 3 | 3 | 3 | 0.52866 | 1.23 | 0.75799 | 0.87 | 0.65276 | 1.00 |
| sp P10655 CATR_MOUSE       | Cathepsin B OS=Mus musculus (Mouse) G          | OS=M   | 746.22  | 4   | 3  | 6  | 7  | 10 | 12 | 1  | 3  | 13 | 1  | 5  | 3 | 3 | 3 | 3 | 3 | 0.66733 | 1.28 | 0.80744 | 0.89 | 0.86465 | 1.06 |
| sp Q908M3 CY1_MOUSE        | Cytochrome c1 home protein OS=Mus muscu        | OS=M   | 519.39  | 7   | 10 | 11 | 8  | 8  | 8  | 5  | 3  | 6  | 5  | 3  | 3 | 3 | 3 | 3 | 3 | 0.60714 | 0.82 | 0.60714 | 0.82 | 0.60714 | 0.82 |
| sp Q9CFR4 RL17_MOUSE       | 60S ribosomal protein L17 OS=Mus muscu         | OS=M   | 786.22  | 5   | 6  | 7  | 8  | 12 | 13 | 11 | 6  | 5  | 11 | 6  | 4 | 3 | 3 | 3 | 3 | 0.03310 | 1.83 | 0.38505 | 1.22 | 0.42578 | 1.17 |
| sp Q9M8N0 CNRP1_MOUSE      | R1 cannabinin receptor-interacting protein     | OS=M   | 587.47  | 5   | 10 | 10 | 9  | 14 | 12 | 9  | 6  | 3  | 10 | 4  | 4 | 3 | 3 | 3 | 3 | 0.23582 | 1.40 | 0.40075 | 0.72 | 0.49863 | 0.72 |
| sp Q90930 VDAC2_MOUSE      | Voltage-dependent anion-selective channel      | OS=M   | 813.13  | 3   | 6  | 10 | 8  | 9  | 9  | 13 | 4  | 7  | 12 | 4  | 4 | 3 | 3 | 3 | 3 | 0.42438 | 1.37 | 0.59119 | 1.26 | 0.70615 | 1.16 |
| sp Q9C966 ROA_MOUSE        | Retinol dehydrogenase 1 OS=Mus musculus        | OS=M   | 402.56  | 4   | 3  | 6  | 7  | 10 | 16 | 9  | 3  | 2  | 5  | 6  | 6 | 6 | 6 | 6 | 6 | 0.50939 | 0.82 | 0.23193 | 0.82 | 0.50939 | 0.82 |
| sp P53810 PIPNA_MOUSE      | Phosphatidylinositol transfer protein alpha I  | OS=M   | 793.04  | 5   | 9  | 6  | 9  | 10 | 6  | 10 | 2  | 7  | 2  | 5  | 3 | 3 | 3 | 3 | 3 | 0.44531 | 1.26 | 0.94987 | 0.95 | 0.43043 | 0.70 |
| sp P35278 RAB5_MOUSE       | Ras-related protein Rab-5 OS=Mus muscu         | OS=M   | 986.83  | 5   | 9  | 10 | 6  | 6  | 9  | 10 | 5  | 6  | 5  | 5  | 6 | 3 | 3 | 3 | 3 | 0.50364 | 0.88 | 0.71154 | 0.88 | 0.31593 | 0.67 |
| sp Q90737 CSK21_MOUSE      | Casasin kinase II subunit alpha OS=Mus m       | OS=M   | 788.2   | 3</ |    |    |    |    |    |    |    |    |    |    |   |   |   |   |   |         |      |         |      |         |      |

|                        |                                                |         |   |   |   |   |    |    |   |   |   |   |   |    |   |   |   |   |         |      |         |      |         |      |
|------------------------|------------------------------------------------|---------|---|---|---|---|----|----|---|---|---|---|---|----|---|---|---|---|---------|------|---------|------|---------|------|
| spi14685/PSM3_MOUSE    | 26S proteasome non-ATPase regulatory su        | 1140.19 | 5 | 5 | 3 | 2 | 10 | 10 | 5 | 4 | 6 | 6 | 3 | 4  | 3 | 3 | 3 | 3 | 0.36650 | 1.69 | 0.34017 | 1.15 | 0.61482 | 1.00 |
| sp Q9D172/ESI1_MOUSE   | E51 protein homolog, mitochondrial OS=M        | 381.48  | 4 | 4 | 4 | 4 | 6  | 7  | 4 | 4 | 2 | 6 | 3 | 2  | 3 | 3 | 3 | 3 | 0.13940 | 1.42 | 0.15669 | 0.83 | 0.99162 | 0.92 |
| sp P73404/CHC1_MOUSE   | Coactylate hydrolyase [NA2] subunit p8         | 687.04  | 4 | 4 | 4 | 4 | 6  | 7  | 4 | 4 | 2 | 6 | 3 | 1  | 3 | 3 | 3 | 3 | 0.11544 | 1.58 | 0.14600 | 0.73 | 0.75441 | 0.83 |
| sp Q9Z0N1/IFZ2_MOUSE   | Eukaryotic translation initiation factor 2 sub | 812.94  | 5 | 5 | 3 | 6 | 6  | 5  | 4 | 5 | 5 | 5 | 2 | 3  | 3 | 3 | 3 | 3 | 0.56200 | 1.29 | 0.55711 | 1.00 | 0.85425 | 0.86 |
| sp Q9JMA1/UBP1_MOUSE   | Ubiquitin carboxyl-terminal hydrolase 14 OS    | 1045.34 | 4 | 4 | 5 | 3 | 7  | 6  | 4 | 4 | 5 | 4 | 2 | 3  | 3 | 3 | 3 | 3 | 0.56924 | 1.23 | 0.70648 | 1.00 | 0.19689 | 0.69 |
| sp Q9D6J6/INDU2_MOUSE  | NADH dehydrogenase [ubiquinone] flavop         | 351.51  | 5 | 4 | 5 | 3 | 6  | 6  | 5 | 3 | 2 | 4 | 2 | 2  | 3 | 3 | 3 | 3 | 0.97103 | 1.07 | 0.21473 | 0.71 | 0.05889 | 0.57 |
| sp P16054/KPCE_MOUSE   | Protein kinase C epsilon type OS=Mus mus       | 856.3   | 5 | 5 | 4 | 3 | 8  | 8  | 3 | 3 | 3 | 4 | 4 | 2  | 3 | 3 | 3 | 3 | 0.28961 | 1.58 | 0.26556 | 0.75 | 0.80789 | 0.83 |
| sp Q9R083/CHRB3_MOUSE  | Chaperone protein 100 kDa OS=Mus mus           | 484.04  | 5 | 5 | 5 | 5 | 6  | 9  | 3 | 3 | 5 | 3 | 3 | 3  | 3 | 3 | 3 | 3 | 0.17440 | 1.67 | 0.26556 | 0.83 | 0.94923 | 0.67 |
| sp Q9R086/IRB0_MOUSE   | RNA-binding protein 3 OS=Mus musculus (M       | 337.73  | 5 | 5 | 2 | 5 | 6  | 9  | 3 | 3 | 2 | 5 | 5 | 4  | 3 | 3 | 3 | 3 | 0.17740 | 1.67 | 0.76560 | 0.83 | 0.27847 | 1.17 |
| sp O70172/PI2A_MOUSE   | Phosphatidylinositol 5-phosphate 4-kinase I    | 337.73  | 3 | 5 | 3 | 4 | 6  | 6  | 3 | 3 | 1 | 6 | 3 | 4  | 3 | 3 | 3 | 3 | 0.14189 | 1.45 | 0.25842 | 0.64 | 0.25567 | 1.18 |
| sp Q70716/ANXA7_MOUSE  | Annexin A7 OS=Mus musculus (Mouse) GN          | 707.73  | 2 | 5 | 4 | 2 | 6  | 6  | 4 | 4 | 4 | 5 | 3 | 3  | 2 | 2 | 2 | 2 | 0.64087 | 1.27 | 0.95950 | 0.73 | 0.47625 | 1.09 |
| sp A2A4W7/A2A4W7_MOUSE | Annexin A2 OS=Mus musculus (Mouse) GN          | 802.84  | 5 | 4 | 4 | 4 | 6  | 6  | 7 | 7 | 6 | 7 | 5 | 4  | 3 | 3 | 3 | 3 | 0.64087 | 1.27 | 0.95950 | 0.73 | 0.47625 | 1.09 |
| sp P94048/ARF5_MOUSE   | ADP-ribosylation factor 5 OS=Mus muscu         | 676.46  | 4 | 5 | 4 | 3 | 6  | 5  | 8 | 2 | 2 | 6 | 2 | 5  | 3 | 3 | 3 | 3 | 0.92034 | 1.08 | 0.86949 | 0.92 | 0.71524 | 1.00 |
| sp Q9I036/PAK3_MOUSE   | Serine/threonine-protein kinase PAK 3 OS       | 932.32  | 5 | 4 | 3 | 3 | 8  | 5  | 6 | 4 | 4 | 5 | 7 | 4  | 3 | 3 | 3 | 3 | 0.49550 | 1.33 | 0.27732 | 1.17 | 0.20093 | 1.33 |
| sp Q8BV05/PPME1_MOUSE  | Protein phosphatase methyltransferase 1 OS     | 544.15  | 5 | 5 | 4 | 2 | 7  | 5  | 6 | 3 | 4 | 4 | 4 | 4  | 3 | 3 | 3 | 3 | 0.83343 | 1.00 | 0.82338 | 0.93 | 0.80658 | 0.86 |
| sp Q9D085/NSA1_MOUSE   | Alpha-soluble NSF attachment protein OS=M      | 864.94  | 3 | 3 | 3 | 5 | 7  | 3  | 6 | 2 | 2 | 5 | 2 | 3  | 3 | 3 | 3 | 3 | 0.16524 | 1.67 | 0.75842 | 1.11 | 0.41176 | 1.11 |
| sp P51655/QPC4_MOUSE   | Glycylase OS=Mus musculus (Mouse) GN           | 570.77  | 3 | 3 | 3 | 3 | 3  | 3  | 6 | 2 | 2 | 5 | 2 | 3  | 3 | 3 | 3 | 3 | 0.41149 | 1.33 | 0.98486 | 1.00 | 0.75092 | 0.79 |
| sp Q9BQ21/HPCL4_MOUSE  | Hippocampal-like protein 4 OS=Mus muscu        | 786.33  | 3 | 5 | 4 | 4 | 8  | 4  | 5 | 4 | 2 | 6 | 2 | 3  | 3 | 3 | 3 | 3 | 0.44555 | 1.33 | 0.87291 | 0.92 | 0.99379 | 0.92 |
| sp P04925/PRIO_MOUSE   | Major prion protein OS=Mus musculus (Mo        | 274.52  | 3 | 3 | 3 | 3 | 5  | 7  | 3 | 3 | 2 | 5 | 4 | 2  | 3 | 3 | 3 | 3 | 0.08685 | 1.55 | 0.29063 | 0.73 | 0.68731 | 1.00 |
| sp Q9C089/QCR6_MOUSE   | Histone h2-b1 complex subunit 8 OS=M           | 204.93  | 3 | 3 | 2 | 2 | 5  | 6  | 4 | 3 | 4 | 3 | 4 | 3  | 3 | 3 | 3 | 3 | 0.02333 | 1.88 | 0.07681 | 1.50 | 0.02622 | 1.38 |
| sp Q9D123/VGLN_MOUSE   | Vglin OS=Mus musculus (Mouse) GN=Htd           | 721.67  | 2 | 2 | 3 | 2 | 6  | 5  | 2 | 2 | 2 | 5 | 3 | 2  | 3 | 3 | 3 | 3 | 0.19499 | 1.66 | 0.59608 | 0.86 | 0.18593 | 1.43 |
| sp Q9G073/RBBP7_MOUSE  | Oocyte-binding protein RBBP7 OS=Mus m          | 371.66  | 3 | 3 | 3 | 2 | 7  | 2  | 3 | 4 | 4 | 4 | 2 | 3  | 3 | 3 | 3 | 3 | 0.78875 | 1.22 | 0.27743 | 1.22 | 0.63085 | 1.00 |
| sp Q9C230/OLA1_MOUSE   | Obg-like ATPase 1 OS=Mus musculus (Mo          | 697.27  | 4 | 3 | 4 | 5 | 6  | 3  | 4 | 4 | 4 | 3 | 1 | 4  | 3 | 3 | 3 | 3 | 0.44531 | 1.27 | 0.29329 | 1.09 | 0.55657 | 0.73 |
| sp Q9I013/INFASC_MOUSE | Neurofascin OS=Mus musculus (Mouse) GF         | 707.91  | 3 | 3 | 4 | 4 | 6  | 4  | 5 | 2 | 3 | 4 | 1 | 1  | 3 | 3 | 3 | 3 | 0.17148 | 1.40 | 0.92155 | 1.00 | 0.29210 | 0.60 |
| sp Q9C9V4/IGLOD4_MOUSE | Glyoxalase domain-containing protein 4 OS      | 699.22  | 3 | 3 | 5 | 5 | 7  | 5  | 3 | 1 | 2 | 4 | 1 | 3  | 3 | 3 | 3 | 3 | 0.12315 | 1.55 | 0.13869 | 0.55 | 0.52325 | 0.73 |
| sp P48678/INNA_MOUSE   | Insulin-like growth factor 1 OS=Mus muscu      | 810.12  | 3 | 5 | 5 | 5 | 5  | 5  | 5 | 5 | 5 | 5 | 5 | 5  | 5 | 5 | 5 | 5 | 0.09975 | 1.60 | 0.17137 | 0.37 | 0.32941 | 0.80 |
| sp Q94010/CRK_MOUSE    | Adaptor molecule crk OS=Mus musculus (M        | 396.15  | 2 | 4 | 2 | 2 | 3  | 6  | 5 | 1 | 4 | 2 | 2 | 3  | 2 | 2 | 2 | 2 | 0.13301 | 1.75 | 0.46661 | 0.63 | 0.70596 | 0.75 |
| sp Q9D019/HRNL2_MOUSE  | Heterogeneous nuclear ribonucleoprotein L      | 1009.1  | 4 | 4 | 3 | 4 | 6  | 5  | 4 | 8 | 3 | 3 | 2 | 3  | 3 | 3 | 3 | 3 | 0.09843 | 1.36 | 0.77397 | 1.00 | 0.19741 | 0.73 |
| sp Q3U164/Q3U164_MOUSE | Putative uncharacterized protein OS=Mus m      | 550     | 4 | 4 | 3 | 4 | 5  | 6  | 6 | 6 | 5 | 4 | 6 | 5  | 3 | 3 | 3 | 3 | 0.12094 | 1.36 | 0.00999 | 1.55 | 0.11442 | 1.36 |
| sp Q35226/PSMD4_MOUSE  | 26S proteasome non-ATPase regulatory su        | 565.88  | 5 | 5 | 5 | 5 | 5  | 5  | 6 | 6 | 6 | 6 | 6 | 6  | 6 | 6 | 6 | 6 | 0.16901 | 1.40 | 0.69801 | 1.40 | 0.27647 | 1.50 |
| sp P92627/DL81_MOUSE   | Dynamin light chain roadblock protein 1 OS=M   | 356.71  | 5 | 5 | 4 | 4 | 5  | 8  | 3 | 6 | 6 | 7 | 5 | 4  | 3 | 3 | 3 | 3 | 0.55644 | 1.21 | 0.59786 | 1.00 | 0.13944 | 1.14 |
| sp Q9C092/FIS1_MOUSE   | Mitochondrial fission 1 protein OS=Mus m       | 622.17  | 2 | 3 | 4 | 3 | 4  | 6  | 7 | 1 | 5 | 6 | 1 | 2  | 3 | 3 | 3 | 3 | 0.33273 | 1.44 | 0.47400 | 1.44 | 0.91299 | 1.00 |
| sp P94089/ERH_MOUSE    | Enhancer of rudimentary homolog OS=Mus         | 427.68  | 2 | 3 | 2 | 2 | 4  | 6  | 7 | 1 | 2 | 4 | 1 | 1  | 3 | 3 | 3 | 3 | 0.25337 | 1.71 | 0.59600 | 1.43 | 0.85447 | 0.86 |
| sp Q9C233/RBM14_MOUSE  | RNA-binding protein 14 OS=Mus musculus         | 637.43  | 5 | 5 | 2 | 2 | 3  | 3  | 8 | 1 | 1 | 5 | 4 | 1  | 3 | 3 | 3 | 3 | 0.50289 | 1.33 | 0.91968 | 1.11 | 0.69122 | 1.11 |
| sp Q95029/PYC_MOUSE    | Pyruvate carboxylase, mitochondrial OS=M       | 932.4   | 4 | 4 | 4 | 4 | 4  | 4  | 6 | 2 | 3 | 4 | 7 | 10 | 3 | 3 | 3 | 3 | 0.35545 | 1.95 | 0.05855 | 0.45 | 0.32941 | 0.80 |
| sp Q9E020/MMSA_MOUSE   | Methylmalonate-semialdehyde dehydrogen         | 591.56  | 5 | 5 | 4 | 5 | 4  | 7  | 4 | 5 | 8 | 3 | 5 | 7  | 3 | 3 | 3 | 3 | 0.64885 | 1.14 | 0.39202 | 1.21 | 0.50066 | 1.07 |
| sp Q35136/NCAM2_MOUSE  | Neural cell adhesion molecule 2 OS=Mus n       | 995.1   | 4 | 4 | 3 | 3 | 5  | 9  | 3 | 5 | 9 | 1 | 3 | 8  | 3 | 3 | 3 | 3 | 0.36153 | 1.55 | 0.29731 | 1.55 | 0.69317 | 1.09 |
| sp Q8R191/NSG3_MOUSE   | Synaptoglycin 3 OS=Mus musculus (Mouse         | 180.12  | 4 | 4 | 2 | 4 | 5  | 7  | 5 | 3 | 4 | 6 | 2 | 6  | 3 | 3 | 3 | 3 | 0.15588 | 1.60 | 0.31122 | 1.20 | 0.28931 | 1.40 |
| sp Q9I213/PLC1_MOUSE   | 1-phosphatidylinositol 3-bisphosphate ph       | 177.46  | 4 | 4 | 4 | 4 | 4  | 4  | 3 | 3 | 4 | 3 | 3 | 3  | 3 | 3 | 3 | 3 | 0.52117 | 1.23 | 0.95238 | 1.00 | 0.27401 | 1.23 |
| sp Q9T3X7/PSMD1_MOUSE  | 26S proteasome non-ATPase regulatory su        | 1111.44 | 3 | 4 | 4 | 2 | 5  | 6  | 4 | 3 | 4 | 3 | 4 | 3  | 3 | 3 | 3 | 3 | 0.73307 | 1.18 | 0.67991 | 1.00 | 0.82442 | 0.91 |
| sp Q9R0P3/ESTD_MOUSE   | S-formylglutathione hydrolase OS=Mus m         | 497.75  | 2 | 4 | 4 | 3 | 5  | 7  | 3 | 5 | 5 | 3 | 4 | 4  | 3 | 3 | 3 | 3 | 0.31780 | 1.50 | 0.30247 | 1.30 | 0.38187 | 1.10 |
| sp P62267/RS23_MOUSE   | 40S ribosomal protein S23 OS=Mus muscu         | 391.53  | 4 | 3 | 3 | 3 | 4  | 2  | 3 | 3 | 3 | 5 | 3 | 3  | 3 | 3 | 3 | 3 | 0.68736 | 1.20 | 0.55021 | 1.10 | 0.41402 | 1.10 |
| sp P23116/EIF3A_MOUSE  | Eukaryotic translation initiation factor 3 sub | 1364.08 | 5 | 5 | 4 | 3 | 4  | 6  | 4 | 3 | 3 | 3 | 5 | 2  | 2 | 3 | 3 | 3 | 0.55089 | 0.93 | 0.02037 | 0.71 | 0.19506 | 0.64 |
| sp Q9R087/PRDX4_MOUSE  | Peroxiredoxin-4 OS=Mus musculus (Mouse) C      | 286.26  | 2 | 4 | 2 | 2 | 2  | 2  | 6 | 2 | 3 | 4 | 2 | 2  | 3 | 3 | 3 | 3 | 0.28537 | 1.71 | 0.25837 | 1.00 | 0.52941 | 0.80 |
| sp Q9JUL5/CUL3_MOUSE   | Cullin-3 OS=Mus musculus (Mouse) GN=C          | 823.51  | 3 | 2 | 2 | 2 | 2  | 2  | 3 | 2 | 1 | 2 | 2 | 2  | 2 | 2 | 2 | 2 | 0.38003 | 1.57 | 0.88609 | 0.86 | 0.88007 | 0.86 |
| sp Q9D1D4/TMED4_MOUSE  | Transmembrane emp24 domain-containin           | 445.73  | 4 | 5 | 2 | 2 | 4  | 4  | 6 | 7 | 6 | 3 | 3 | 4  | 3 | 3 | 3 | 3 | 0.64714 | 0.91 | 0.04235 | 1.73 | 0.86564 | 0.91 |
| sp P93P44/ESPV4_MOUSE  | ATPase inhibitor, mitochondrial OS=Mus m       | 379.47  | 4 | 4 | 5 | 4 | 3  | 5  | 6 | 3 | 7 | 4 | 2 | 5  | 3 | 3 | 3 | 3 | 0.28283 | 0.86 | 0.51104 | 1.14 | 0.63307 | 0.79 |
| sp Q9ZNL5/ISG3_MOUSE   | Interferon-stimulated gene 3 OS=Mus muscu      | 713.43  | 4 | 4 | 4 | 4 | 4  | 4  | 3 | 3 | 4 | 3 | 3 | 3  | 3 | 3 | 3 | 3 | 0.52117 | 1.23 | 0.95238 | 1.00 | 0.27401 | 1.23 |
| sp P30416/FKBP4_MOUSE  | Peptidyl-prolyl cis-trans isomerase FKBP4 (    | 698.38  | 4 | 4 | 3 | 4 | 5  | 4  | 9 | 3 | 4 | 6 | 2 | 5  | 3 | 3 | 3 | 3 | 0.27219 | 1.18 | 0.32565 | 1.45 | 0.39764 | 1.18 |
| sp P57776/EF1D_MOUSE   | Protein elongation factor 1-delta OS=Mus mu    | 468.92  | 5 | 5 | 2 | 4 | 4  | 2  | 6 | 4 | 2 | 6 | 3 | 3  | 1 | 3 | 3 | 3 | 0.69481 | 0.91 | 0.72167 | 1.09 | 0.92192 | 0.91 |
| sp Q9I0713/BAX_MOUSE   | Apoptosis regulator BAX OS=Mus muscu           | 639.02  | 4 | 4 | 4 | 4 | 2  | 3  | 7 | 3 | 3 | 3 | 2 | 2  | 3 | 3 | 3 | 3 | 0.13125 | 0.69 | 0.93985 | 1.00 | 0.01799 | 0.54 |
| sp Q9D028/VP59_MOUSE   | Vacuolar protein sorting-associated protein    | 322.53  | 2 | 2 | 2 | 2 | 2  | 2  | 4 | 4 | 3 | 3 | 2 | 2  | 2 | 2 | 2 | 2 | 0.47328 | 1.25 | 0.40071 | 1.38 | 0.58760 | 0.75 |
| sp P90967/ISOM_MOUSE   | Isomerase OS=Mus musculus (Mouse)              |         |   |   |   |   |    |    |   |   |   |   |   |    |   |   |   |   |         |      |         |      |         |      |



|                        |                                                 |         |   |   |   |   |   |   |   |   |   |   |   |   |   |         |      |         |      |         |      |
|------------------------|-------------------------------------------------|---------|---|---|---|---|---|---|---|---|---|---|---|---|---|---------|------|---------|------|---------|------|
| sp Q9JMG7 HDGR3_MOUSE  | Hepatoma-derived growth factor-related pro      | 289.37  | 3 | 1 | 2 | 1 | 1 | 2 | 3 | 1 | 2 | 2 | 2 | 2 | 2 | 0.76640 | 0.75 | 0.89330 | 0.75 | 0.95367 | 1.00 |
| sp Q56926 TR150_MOUSE  | Thyroid hormone receptor-associated protein     | 307.43  | 4 | 1 | 3 | 3 | 3 | 1 | 2 | 1 | 2 | 1 | 3 | 2 | 1 | 0.70133 | 0.80 | 0.98440 | 1.00 | 0.88375 | 0.60 |
| sp Q3C0F9 SSRG_MOUSE   | Transcobalamin-associated protein subunit gamma | 144.05  | 2 | 1 | 1 | 1 | 1 | 1 | 1 | 1 | 1 | 1 | 2 | 3 | 3 | 0.69553 | 1.33 | 0.82677 | 0.67 | 0.91671 | 1.00 |
| sp Q6BH66 JATL1_MOUSE  | Atlastin-1 OS=Mus musculus (Mouse) GN=          | 594.54  | 2 | 1 | 1 | 1 | 2 | 3 | 1 | 1 | 1 | 1 | 1 | 2 | 1 | 0.94277 | 1.00 | 0.96440 | 1.00 | 0.72684 | 0.67 |
| sp Q9R0H0 ACOX1_MOUSE  | Peroxisomal acyl-coenzyme A oxidase 1 C         | 670.62  | 3 | 4 | 2 | 3 | 5 | 3 | 1 | 5 | 2 | 4 | 2 | 3 | 3 | 0.62686 | 1.43 | 0.68526 | 1.29 | 0.66580 | 1.14 |
| sp G3X972 G3X972_MOUSE | Protein Sec24 OS=Mus musculus (Mouse)           | 495.05  | 2 | 4 | 4 | 4 | 2 | 1 | 3 | 1 | 3 | 3 | 1 | 2 | 3 | 0.44796 | 1.67 | 0.80777 | 0.83 | 0.70186 | 1.17 |
| sp Q3C543 CENPY_MOUSE  | Centromere protein V OS=Mus musculus (M         | 344.07  | 2 | 2 | 2 | 2 | 3 | 2 | 1 | 2 | 3 | 2 | 2 | 2 | 3 | 0.31088 | 1.75 | 0.80231 | 0.75 | 0.15151 | 1.75 |
| sp Q3JUF7 COPR_MOUSE   | Centromere subunit beta OS=Mus musculus         | 344.05  | 3 | 4 | 2 | 2 | 3 | 2 | 2 | 2 | 4 | 2 | 2 | 2 | 3 | 0.49456 | 1.40 | 0.84008 | 1.00 | 0.89150 | 0.60 |
| sp Q17M36 CSPG5_MOUSE  | Chondroitin sulfate proteoglycan 5 OS=Mu        | 449.78  | 3 | 2 | 3 | 5 | 1 | 3 | 1 | 2 | 1 | 2 | 1 | 2 | 3 | 0.45065 | 1.80 | 0.91992 | 1.00 | 0.95920 | 1.00 |
| sp Q8BWY3 IERF1_MOUSE  | Eukaryotic peptide chain release factor sub     | 342.29  | 2 | 2 | 2 | 2 | 2 | 1 | 2 | 1 | 2 | 2 | 2 | 3 | 2 | 0.76206 | 1.25 | 0.63754 | 1.25 | 0.93052 | 1.00 |
| sp Q3C2W4 ACSLS3_MOUSE | Long-chain fatty acyl-CoA ligase 3 OS=M         | 569.18  | 3 | 1 | 2 | 1 | 4 | 1 | 5 | 1 | 1 | 1 | 2 | 2 | 2 | 0.90716 | 1.25 | 0.55264 | 1.75 | 0.90006 | 0.75 |
| sp Q9P692 HM2_MOUSE    | Nucleosome chromatin protein HM200              | 213.73  | 2 | 2 | 2 | 2 | 4 | 2 | 2 | 2 | 2 | 3 | 1 | 1 | 3 | 0.82539 | 1.40 | 0.82539 | 1.40 | 0.82539 | 0.60 |
| sp Q3JZ22 SYN3_MOUSE   | Synapsin-3 OS=Mus musculus (Mouse) GN           | 449.74  | 2 | 2 | 2 | 3 | 2 | 2 | 2 | 2 | 2 | 1 | 2 | 1 | 1 | 0.68028 | 1.67 | 0.76621 | 0.67 | 0.78864 | 0.67 |
| sp O8997 JATOX1_MOUSE  | Copper-storage protein ATOX1 OS=Mus             | 121.45  | 2 | 3 | 2 | 1 | 1 | 3 | 2 | 2 | 1 | 1 | 2 | 1 | 1 | 0.74873 | 1.50 | 0.82654 | 1.50 | 0.92924 | 1.00 |
| sp Q3U9H9 GAGAP2_MOUSE | Arf-GAP with GTPase, ANK repeat and PH          | 377.84  | 2 | 1 | 2 | 1 | 1 | 2 | 1 | 1 | 2 | 1 | 2 | 2 | 1 | 0.76646 | 1.50 | 0.97860 | 1.00 | 0.99229 | 1.00 |
| sp P17056 HMG21_MOUSE  | High mobility group protein HMG-HMG-1 C         | 86.92   | 2 | 1 | 1 | 1 | 2 | 3 | 1 | 2 | 3 | 1 | 1 | 2 | 1 | 0.96818 | 1.00 | 0.96559 | 1.00 | 0.80194 | 1.50 |
| sp Q81029 AP2B_MOUSE   | Lamine-associated polypeptide 2 isoform         | 430.11  | 2 | 1 | 2 | 1 | 1 | 2 | 2 | 2 | 2 | 2 | 2 | 2 | 2 | 0.52394 | 1.00 | 0.76524 | 0.67 | 0.96350 | 1.00 |
| sp Q8Z1F9 SAE2_MOUSE   | SUMO-activating enzyme subunit 2 OS=M           | 531.95  | 4 | 2 | 2 | 1 | 3 | 1 | 1 | 3 | 3 | 1 | 1 | 2 | 2 | 0.78358 | 0.75 | 0.98402 | 1.00 | 0.84412 | 0.75 |
| sp Q8BG51 MIRO1_MOUSE  | Mitochondrial Rho GTPase 1 OS=Mus mus           | 341.2   | 2 | 1 | 2 | 2 | 1 | 1 | 2 | 1 | 2 | 1 | 2 | 2 | 1 | 0.77885 | 1.50 | 0.97860 | 1.00 | 0.99229 | 1.00 |
| sp Q9Z051 BPN1_MOUSE   | 3'(2')5'-bisphosphate nucleotidase 1 OS=        | 395.57  | 3 | 1 | 1 | 1 | 1 | 2 | 2 | 2 | 1 | 2 | 1 | 2 | 2 | 0.72977 | 0.67 | 0.72061 | 1.33 | 0.88142 | 1.00 |
| sp Q9N7F9 COPF_MOUSE   | Cleavage and polyadenylation specificity fa     | 297.36  | 3 | 3 | 1 | 1 | 1 | 2 | 2 | 1 | 1 | 2 | 1 | 2 | 2 | 0.72977 | 0.67 | 0.92822 | 1.00 | 0.88142 | 1.00 |
| sp P58395 CYB5_MOUSE   | Cytochrome b5 OS=Mus musculus (Mouse)           | 346.26  | 2 | 1 | 3 | 3 | 1 | 2 | 2 | 2 | 2 | 1 | 1 | 2 | 1 | 0.82617 | 1.50 | 0.70632 | 1.50 | 0.91525 | 1.00 |
| sp P63087 PP1G_MOUSE   | Serine/threonine-protein phosphatase PP1-       | 1017.14 | 1 | 8 | 4 | 3 | 8 | 7 | 6 | 2 | 2 | 8 | 3 | 3 | 3 | 0.59164 | 1.38 | 0.70988 | 0.77 | 0.75848 | 1.08 |
| sp Q55125 NIP51_MOUSE  | Protein Nip5 homolog 1 OS=Mus muscu             | 465.74  | 1 | 6 | 5 | 4 | 6 | 3 | 6 | 3 | 2 | 4 | 3 | 3 | 3 | 0.94071 | 1.08 | 0.90868 | 0.92 | 0.88422 | 0.83 |
| sp P62901 RL1_MOUSE    | 60S ribosomal protein L31 OS=Mus muscu          | 318.81  | 1 | 3 | 3 | 6 | 5 | 2 | 5 | 3 | 3 | 2 | 4 | 3 | 3 | 0.25670 | 1.86 | 0.72799 | 1.14 | 0.32564 | 1.29 |
| sp Q3JAS2 Q3JAS2_MOUSE | Electron transfer flavoprotein-ubiquinone o     | 624.34  | 1 | 4 | 2 | 2 | 6 | 2 | 6 | 2 | 6 | 2 | 6 | 1 | 3 | 0.59933 | 1.43 | 0.68707 | 0.86 | 0.47620 | 1.14 |
| sp Q921G7 ETFD_MOUSE   | EH domain-containing protein 3 OS=M             | 1077.61 | 1 | 4 | 4 | 3 | 5 | 3 | 6 | 3 | 3 | 4 | 4 | 4 | 3 | 0.69502 | 1.22 | 0.42073 | 1.33 | 0.20769 | 1.33 |
| sp Q921Y6 EH2_MOUSE    | Valine-tRNA ligase OS=Mus musculus (Mo          | 757.47  | 1 | 2 | 5 | 4 | 4 | 3 | 5 | 4 | 3 | 3 | 1 | 4 | 3 | 0.56883 | 1.38 | 0.32634 | 1.50 | 0.86620 | 1.00 |
| sp Q9P681 HMOX1_MOUSE  | NAD(P)-dependent oxidoreductase OS=Mu           | 563.92  | 1 | 2 | 2 | 2 | 4 | 2 | 2 | 2 | 2 | 3 | 1 | 3 | 3 | 0.68552 | 1.63 | 0.82324 | 1.00 | 0.82324 | 1.00 |
| sp Q9DBL1 ACDSB_MOUSE  | Short-branched chain specific acyl-CoA deH      | 522.52  | 1 | 2 | 4 | 4 | 2 | 2 | 3 | 1 | 3 | 2 | 3 | 1 | 3 | 0.85275 | 1.14 | 0.95415 | 1.00 | 0.96355 | 0.86 |
| sp Q9XJY5 COPD_MOUSE   | Centromere subunit delta OS=Mus muscu           | 481.84  | 1 | 2 | 2 | 2 | 4 | 2 | 1 | 1 | 2 | 1 | 1 | 3 | 3 | 0.26121 | 1.60 | 0.52681 | 0.80 | 0.41271 | 1.33 |
| sp B2R08 B2R08_MOUSE   | Spectrin beta 1 OS=Mus musculus (Mouse)         | 388.79  | 1 | 2 | 2 | 3 | 3 | 2 | 3 | 1 | 2 | 1 | 2 | 1 | 2 | 0.13679 | 1.60 | 0.72018 | 0.80 | 0.42628 | 0.60 |
| sp Q88741 GDAF1_MOUSE  | Ganglioside-induced differentiation-associ      | 355.5   | 1 | 4 | 4 | 2 | 2 | 4 | 4 | 2 | 2 | 2 | 2 | 3 | 2 | 0.71836 | 0.89 | 0.53562 | 0.67 | 0.51559 | 0.67 |
| sp Q9T023 ALX1_MOUSE   | Putative tyrosine kinase class mu chain Va      | 622.17  | 1 | 2 | 3 | 4 | 2 | 1 | 1 | 3 | 3 | 1 | 1 | 3 | 3 | 0.54775 | 1.00 | 0.10889 | 1.00 | 0.35475 | 0.60 |
| sp Q91086 ANFY1_MOUSE  | Rabkynin-5 OS=Mus musculus (Mouse) C            | 304.88  | 1 | 2 | 2 | 3 | 1 | 2 | 2 | 3 | 1 | 2 | 2 | 3 | 2 | 0.70906 | 1.20 | 0.56920 | 1.20 | 0.83987 | 0.80 |
| sp Q9COH3 INDUB5_MOUSE | NADH dehydrogenase [ubiquinone] 1 beta          | 154.62  | 1 | 2 | 3 | 1 | 3 | 3 | 5 | 2 | 2 | 3 | 1 | 3 | 3 | 0.83994 | 1.17 | 0.85143 | 1.17 | 0.58860 | 0.67 |
| sp Q9Z09 DCTN5_MOUSE   | Dynactin subunit 5 OS=Mus musculus (Mo          | 278.89  | 1 | 2 | 1 | 1 | 2 | 2 | 2 | 2 | 1 | 1 | 2 | 2 | 3 | 0.43271 | 0.80 | 0.86220 | 1.00 | 0.65413 | 1.00 |
| sp Q7M0F3 G7M0F3_MOUSE | Glycylglycyl transferase class mu chain Va      | 171.62  | 1 | 2 | 2 | 2 | 2 | 2 | 2 | 1 | 1 | 2 | 2 | 2 | 2 | 0.92648 | 1.00 | 0.91612 | 1.00 | 0.73968 | 1.33 |
| sp Q9R1R2 TPM1_MOUSE   | Tropomyosin alpha-4 chain OS=Mus muscu          | 279.83  | 1 | 2 | 2 | 1 | 1 | 2 | 3 | 1 | 2 | 2 | 1 | 3 | 3 | 0.43271 | 0.80 | 0.86220 | 1.00 | 0.41271 | 0.60 |
| sp E901Z0 E901Z0_MOUSE | Protein 4732456N10Rk OS=Mus muscu               | 308.35  | 1 | 3 | 2 | 1 | 5 | 2 | 2 | 6 | 2 | 1 | 4 | 3 | 2 | 0.96324 | 1.00 | 0.37489 | 1.00 | 0.60592 | 1.17 |
| sp Q9D023 MPC2_MOUSE   | Mitochondrial pyruvate carrier 2 OS=Mu          | 261.43  | 1 | 3 | 2 | 2 | 3 | 2 | 3 | 2 | 3 | 1 | 3 | 2 | 2 | 0.66908 | 0.83 | 0.77610 | 0.83 | 0.60063 | 0.67 |
| sp P69566 RANB9_MOUSE  | Ran-binding protein S24 OS=Mus muscu            | 172.9   | 1 | 2 | 2 | 2 | 1 | 1 | 1 | 1 | 2 | 3 | 2 | 2 | 2 | 0.29628 | 0.60 | 0.14585 | 0.60 | 0.55478 | 0.60 |
| sp Q55100 GSD1_MOUSE   | Dynactin-1 OS=Mus musculus (Mouse)              | 243.64  | 1 | 2 | 1 | 2 | 2 | 2 | 2 | 2 | 1 | 1 | 1 | 3 | 3 | 0.31439 | 1.00 | 0.31439 | 1.00 | 0.44858 | 0.60 |
| sp Q92376 RU17_MOUSE   | U1 small nuclear ribonucleoprotein 70 kDa       | 356.03  | 1 | 3 | 1 | 2 | 2 | 2 | 2 | 2 | 2 | 1 | 3 | 3 | 3 | 0.12857 | 1.50 | 0.06940 | 1.50 | 0.27277 | 1.50 |
| sp Q90749 KHDIR1_MOUSE | KH domain-containing, RNA-binding, signal       | 485.03  | 1 | 3 | 1 | 2 | 4 | 3 | 1 | 5 | 3 | 1 | 3 | 3 | 3 | 0.20088 | 1.80 | 0.34418 | 1.80 | 0.26642 | 1.80 |
| sp P65771 TYH3_MOUSE   | Protein tyrosine kinase OS=Mus muscu            | 363.83  | 1 | 2 | 1 | 2 | 2 | 2 | 2 | 1 | 2 | 3 | 1 | 3 | 3 | 0.12857 | 1.50 | 0.39090 | 1.25 | 0.17001 | 1.75 |
| sp P61957 AP151_MOUSE  | AP-1 complex subunit 1 OS=Mus muscu             | 282.25  | 1 | 2 | 1 | 2 | 2 | 2 | 2 | 1 | 1 | 1 | 1 | 2 | 2 | 0.75476 | 1.75 | 0.91676 | 1.75 | 0.92924 | 1.00 |
| sp Q9CWC3 RBMM8_MOUSE  | RNA-binding protein 8A OS=Mus muscu             | 211.17  | 1 | 2 | 2 | 2 | 2 | 1 | 1 | 1 | 1 | 1 | 1 | 3 | 3 | 0.12857 | 1.50 | 0.44287 | 0.75 | 0.58760 | 0.75 |
| sp F6ZU0 F6ZU0_MOUSE   | Elongation factor 1-delta OS=Mus muscu          | 377.84  | 1 | 3 | 1 | 2 | 3 | 1 | 3 | 2 | 2 | 4 | 2 | 1 | 3 | 0.76757 | 1.20 | 0.29286 | 1.40 | 0.42599 | 1.40 |
| sp Q9WV3 KCD12_MOUSE   | BTB/POZ domain-containing protein KCD12         | 115.48  | 1 | 3 | 1 | 2 | 3 | 1 | 2 | 2 | 2 | 2 | 2 | 2 | 2 | 0.76757 | 1.20 | 0.79966 | 0.80 | 0.85312 | 0.80 |
| sp P62849 RS2A1_MOUSE  | 40S ribosomal protein S24 OS=Mus muscu          | 311.53  | 1 | 3 | 1 | 4 | 2 | 2 | 2 | 1 | 2 | 1 | 2 | 1 | 3 | 0.62451 | 1.20 | 0.71563 | 0.80 | 0.75847 | 1.00 |
| sp E90X22 E90X22_MOUSE | Ubiquitin-conjugating enzyme E2 OS=Mu           | 528.92  | 1 | 3 | 1 | 4 | 1 | 1 | 1 | 1 | 1 | 1 | 1 | 3 | 3 | 0.48952 | 1.00 | 0.48952 | 1.00 | 0.48952 | 0.60 |
| sp Q9QUP5 HPLN1_MOUSE  | Hyaluronan and proteoglycan link protein 1      | 777.79  | 1 | 3 | 1 | 2 | 1 | 1 | 4 | 1 | 2 | 1 | 1 | 3 | 2 | 0.48071 | 0.60 | 0.99789 | 1.00 | 0.54117 | 0.60 |
| sp Q91074 PPM1G_MOUSE  | Protein phosphatase 1G OS=Mus muscu             | 344.4   | 1 | 2 | 1 | 1 | 5 | 1 | 2 | 2 | 2 | 2 | 1 | 3 | 3 | 0.52851 | 1.75 | 0.09840 | 1.50 | 0.30971 | 1.25 |
| sp Q8B2M2 SYLC_MOUSE   | Leucine-tRNA ligase, cytoplasmic OS=Mu          | 830.91  | 1 | 3 | 1 | 1 | 4 | 1 | 2 | 2 | 3 | 1 | 2 | 3 | 3 | 0.84780 | 1.20 | 0.32418 | 1.40 | 0.60393 | 0.60 |
| sp Q35114 H3CB2_MOUSE  | 3-methylcrotonyl-CoA carboxylase mu             | 260.32  | 1 | 3 | 1 | 1 | 4 | 1 | 1 | 1 | 1 | 3 | 1 | 3 | 3 | 0.80534 | 1.67 | 0.50534 | 1.67 | 0.42919 | 1.05 |
| sp P35282 RAB21_MOUSE  | Ras-related protein Rab-21 OS=Mus muscu         | 408.89  | 1 | 1 | 1 | 1 | 4 | 1 | 3 | 2 | 1 | 1 | 1 | 3 | 3 | 0.84780 | 1.20 | 0.57105 | 0.60 | 0.81058 | 0.80 |
| sp Q8BT38 Q8BT38_MOUSE | Putative                                        |         |   |   |   |   |   |   |   |   |   |   |   |   |   |         |      |         |      |         |      |

**Table S2. Gene Ontology classification of differentially expressed, rescued proteins.**

| Category  | Term          | Count | %          | PValue     | Proteins                              | List Total | Pop Hits | Pop Total | Fold Enrichm | Bonferroni | Benjamini  | FDR        |
|-----------|---------------|-------|------------|------------|---------------------------------------|------------|----------|-----------|--------------|------------|------------|------------|
| GOTERM_M  | GO:0000166    | 14    | 50         | 1.66E-06   | Q9CW03, Q99020, Q91ZR1, Q921F4, P30   | 28         | 1936     | 17446     | 4.50568182   | 1.64E-04   | 1.64E-04   | 0.00183826 |
| INTERPRO  | IPRO27417:P   | 9     | 32.1428571 | 1.47E-05   | Q9CW03, Q91ZR1, P21278, S4R232, P306  | 28         | 909      | 20594     | 7.28217822   | 0.00127464 | 0.00127464 | 0.01584308 |
| UP_KEYWOR | Nucleotide-b  | 11    | 39.2857143 | 1.85E-05   | P05132, Q9CW03, Q91ZR1, Q99PU5, P21   | 28         | 1754     | 22680     | 5.07981756   | 0.00203303 | 0.00203303 | 0.02090064 |
| UP_KEYWOR | GTP-binding   | 6     | 21.4285714 | 4.04E-05   | Q91ZR1, P21278, S4R232, P30677, P352E | 28         | 332      | 22680     | 14.6385542   | 0.00443471 | 0.00221982 | 0.04564041 |
| UP_SEQ_FE | nucleotide.pl | 6     | 21.4285714 | 6.70E-05   | Q91ZR1, P21278, S4R232, P30677, P352E | 26         | 319      | 18012     | 13.0301423   | 0.006216   | 0.006216   | 0.07337298 |
| GOTERM_M  | GO:0005525    | 6     | 21.4285714 | 2.69E-04   | Q91ZR1, P21278, S4R232, P30677, P352E | 28         | 383      | 17446     | 9.76091011   | 0.02630855 | 0.01324195 | 0.29789629 |
| UP_KEYWOR | Phosphoprot   | 19    | 67.8571429 | 4.48E-04   | Q9DCN2, Q9CW03, Q99020, P21126, Q91   | 28         | 7617     | 22680     | 2.0204805    | 0.04813435 | 0.01630933 | 0.50540779 |
| UP_KEYWOR | Acetylation   | 12    | 42.8571429 | 5.16E-04   | Q9CYR6, Q9CW03, Q9DCN2, Q99020, Q9    | 28         | 3125     | 22680     | 3.1104       | 0.05519451 | 0.01409379 | 0.581459   |
| UP_KEYWOR | Cytoplasm     | 14    | 50         | 7.04E-04   | Q9DCN2, Q99020, P21126, P56371, P051  | 28         | 4404     | 22680     | 2.57493188   | 0.07452646 | 0.0153706  | 0.79234111 |
| GOTERM_CC | GO:0005739    | 9     | 32.1428571 | 0.00165395 | P05132, Q9DCN2, Q8BGH2, O89023, Q91   | 28         | 1721     | 19662     | 3.67224205   | 0.14551396 | 0.14551396 | 1.80307883 |
| GOTERM_CC | GO:0070062    | 11    | 39.2857143 | 0.0019703  | P05132, Q9DCN2, Q8BGH2, O89023, P24   | 28         | 2674     | 19662     | 2.88869003   | 0.1708572  | 0.08942722 | 2.1445667  |
| UP_KEYWOR | Lipoprotein   | 6     | 21.4285714 | 0.00204304 | P05132, Q9DCN2, Q91ZR1, P21278, S4R2  | 28         | 780      | 22680     | 6.23076923   | 0.20145504 | 0.0367998  | 2.28414508 |
| GOTERM_M  | GO:0003924    | 4     | 14.2857143 | 0.00401014 | P21278, P30677, D3Y268, P56371        | 28         | 209      | 17446     | 11.924812    | 0.32820502 | 0.12418526 | 4.35387531 |
| INTERPRO  | IPRO00654:G   | 2     | 7.14285714 | 0.00523432 | P21278, P30677                        | 28         | 4        | 20594     | 367.75       | 0.36655495 | 0.20410739 | 5.51404488 |
| GOTERM_CC | GO:0005737    | 17    | 60.7142857 | 0.00570778 | Q9CW03, Q9DCN2, Q99020, P21126, P56   | 28         | 6631     | 19662     | 1.80027792   | 0.41945738 | 0.16578492 | 6.09812944 |
| UP_SEQ_FE | short sequen  | 3     | 10.7142857 | 0.00842407 | Q91ZR1, S4R232, P35283, P56371        | 26         | 100      | 18012     | 20.7830769   | 0.54468102 | 0.32522672 | 8.84538121 |
| GOTERM_CC | GO:0005829    | 8     | 28.5714286 | 0.00876123 | Q9CYR6, P05132, P21126, P21278, Q922I | 28         | 1784     | 19662     | 3.14894299   | 0.56655248 | 0.18860163 | 9.21973172 |
| UP_SEQ_FE | lipid moiety  | 3     | 10.7142857 | 0.01011654 | Q91ZR1, S4R232, P35283, P56371        | 26         | 110      | 18012     | 18.8937063   | 0.61156522 | 0.27036437 | 10.5342867 |
| GOTERM_CC | GO:0032593    | 2     | 7.14285714 | 0.01229368 | Q91ZR1, S4R232, P56371                | 28         | 9        | 19662     | 156.047619   | 0.69122372 | 0.20945101 | 12.7131425 |
| GOTERM_M  | GO:0005515    | 13    | 46.4285714 | 0.01304464 | Q9DCN2, Q9CW03, Q99020, O89023, A0    | 28         | 4092     | 17446     | 1.97945469   | 0.72744554 | 0.27745762 | 13.5378819 |
| INTERPRO  | IPRO01806:S   | 3     | 10.7142857 | 0.01326132 | Q91ZR1, S4R232, P35283, P56371        | 28         | 134      | 20594     | 16.4664179   | 0.68696909 | 0.32101152 | 13.4356186 |
| UP_SEQ_FE | domain:RRM    | 3     | 10.7142857 | 0.01350891 | Q99020, Q921F4, P52912                | 26         | 128      | 18012     | 16.2367788   | 0.71773016 | 0.27110307 | 13.8341783 |
| UP_SEQ_FE | domain:RRM    | 3     | 10.7142857 | 0.01350891 | Q99020, Q921F4, P52912                | 26         | 128      | 18012     | 16.2367788   | 0.71773016 | 0.27110307 | 13.8341783 |
| GOTERM_BF | GO:0060158    | 2     | 7.14285714 | 0.0137436  | P21278, P30677                        | 26         | 10       | 18082     | 139.092308   | 0.90618729 | 0.90618729 | 15.5490801 |
| GOTERM_CC | GO:0048471    | 5     | 17.8571429 | 0.01401921 | P05132, Q9WTX2, Q91ZR1, P24369, S4R2  | 28         | 692      | 19662     | 5.07380264   | 0.73848116 | 0.20031829 | 14.3747733 |
| UP_KEYWOR | Prenylation   | 3     | 10.7142857 | 0.0149212  | Q91ZR1, S4R232, P35283, P56371        | 28         | 157      | 22680     | 15.477707    | 0.80865936 | 0.21041111 | 15.6211807 |
| KEGG_PATH | mmu05146:z    | 3     | 10.7142857 | 0.01853061 | P05132, P21278, P30677                | 15         | 117      | 7691      | 13.1470085   | 0.74945815 | 0.74945815 | 17.7801684 |
| INTERPRO  | IPRO05225:S   | 3     | 10.7142857 | 0.01964105 | Q91ZR1, S4R232, P35283, P56371        | 28         | 165      | 20594     | 13.3727273   | 0.82196502 | 0.35042944 | 19.296218  |
| SMART     | SM00275:SV    | 2     | 7.14285714 | 0.01978062 | P21278, P30677                        | 14         | 16       | 10425     | 93.0803571   | 0.258947   | 0.258947   | 12.9689304 |
| COG_ONTO  | Coenzyme m    | 2     | 7.14285714 | 0.02055046 | Q8BHC4, Q922D8                        | 5          | 11       | 2126      | 77.3090909   | 0.07970247 | 0.07970247 | 7.62193054 |
| INTERPRO  | IPRO01019:G   | 2     | 7.14285714 | 0.02077947 | P21278, P30677                        | 28         | 16       | 20594     | 91.9375      | 0.83908207 | 0.30606165 | 20.3033091 |
| INTERPRO  | IPRO11025:G   | 2     | 7.14285714 | 0.02077947 | P21278, P30677                        | 28         | 16       | 20594     | 91.9375      | 0.83908207 | 0.30606165 | 20.3033091 |
| UP_KEYWOR | Magnesium     | 4     | 14.2857143 | 0.02341931 | Q9CYR6, P21278, P30677, Q9CPY7        | 28         | 521      | 22680     | 6.21880998   | 0.92622747 | 0.27808373 | 23.4896967 |
| UP_KEYWOR | Methylation   | 5     | 17.8571429 | 0.02577614 | Q8BGH2, Q99020, Q91ZR1, S4R232, D3Y   | 28         | 960      | 22680     | 4.21875      | 0.94344595 | 0.27325031 | 25.5501458 |
| GOTERM_M  | GO:0044822    | 6     | 21.4285714 | 0.02612478 | Q9WTX2, Q99020, P24369, Q921F4, P52E  | 28         | 1113     | 17446     | 3.35887563   | 0.9272508  | 0.4079401  | 25.4176864 |
| GOTERM_CC | GO:0016020    | 16    | 57.1428571 | 0.02671011 | Q9DCN2, P21126, Q91ZR1, Q921F4, Q8B   | 28         | 6998     | 19662     | 1.60551994   | 0.92361463 | 0.30748366 | 25.7395063 |
| GOTERM_M  | GO:0019001    | 2     | 7.14285714 | 0.02750716 | P21278, P30677                        | 28         | 18       | 17446     | 69.2301587   | 0.93679453 | 0.3688599  | 26.5821652 |
| SMART     | SM00360:RR    | 3     | 10.7142857 | 0.03195314 | Q99020, Q921F4, P52912                | 14         | 229      | 10425     | 9.7551466    | 0.3856078  | 0.21616826 | 20.2109578 |
| UP_KEYWOR | RNA-binding   | 4     | 14.2857143 | 0.03378888 | Q9WTX2, Q99020, Q921F4, P52912        | 28         | 601      | 22680     | 5.39101498   | 0.9772006  | 0.31483947 | 32.1827649 |
| GOTERM_M  | GO:0031683    | 2     | 7.14285714 | 0.03800639 | P21278, P30677                        | 28         | 25       | 17446     | 49.8457143   | 0.97842024 | 0.42189507 | 34.900773  |
| GOTERM_BF | GO:0030100    | 2     | 7.14285714 | 0.03802642 | Q91ZR1, S4R232, P56371                | 26         | 28       | 18082     | 49.6758242   | 0.99867902 | 0.96365464 | 37.7140911 |
| INTERPRO  | IPRO00504:R   | 3     | 10.7142857 | 0.03950976 | Q99020, Q921F4, P52912                | 28         | 241      | 20594     | 9.15560166   | 0.97001615 | 0.44262447 | 35.3168661 |
| KEGG_PATH | mmu04020:c    | 3     | 10.7142857 | 0.04121417 | P05132, P21278, P30677                | 15         | 1807     | 7691      | 8.54555556   | 0.95559836 | 0.78928302 | 35.6296644 |
| GOTERM_BF | GO:0007264    | 3     | 10.7142857 | 0.04179136 | Q91ZR1, S4R232, P35283, P56371        | 26         | 236      | 18082     | 8.84061278   | 0.99932442 | 0.91225453 | 40.6265678 |
| UP_SEQ_FE | nucleotide.pl | 5     | 17.8571429 | 0.04192923 | P05132, Q9CW03, Q99PU5, Q8BHC4, Q9    | 26         | 963      | 18012     | 3.59693266   | 0.98138017 | 0.54918834 | 37.4322709 |
| GOTERM_CC | GO:0005834    | 2     | 7.14285714 | 0.05092453 | P21278, P30677                        | 28         | 38       | 19662     | 36.9586466   | 0.99302457 | 0.46241596 | 43.7025512 |
| INTERPRO  | IPRO12677:N   | 3     | 10.7142857 | 0.0520625  | Q99020, Q921F4, P52912                | 28         | 281      | 20594     | 7.85231317   | 0.99045372 | 0.48547687 | 43.8894472 |
| UP_SEQ_FE | domain:RRM    | 2     | 7.14285714 | 0.06717819 | Q921F4, P52912                        | 26         | 50       | 18012     | 27.7107692   | 0.99844662 | 0.65968609 | 53.2941109 |
| GOTERM_CC | GO:0030529    | 3     | 10.7142857 | 0.07099296 | Q99020, Q921F4, P52912                | 28         | 320      | 19662     | 6.58325893   | 0.99908419 | 0.54035468 | 55.4894065 |
| UP_KEYWOR | ATP-binding   | 5     | 17.8571429 | 0.07575569 | P05132, Q9CW03, Q99PU5, Q8BHC4, Q9    | 28         | 1363     | 22680     | 2.97138665   | 0.9998276  | 0.54515037 | 58.9370112 |
| KEGG_PATH | mmu00330:z    | 2     | 7.14285714 | 0.08566337 | Q8CHT0, Q9CPY7                        | 15         | 49       | 7691      | 20.9278912   | 0.99867611 | 0.89019613 | 60.8339399 |
| KEGG_PATH | mmu00520:z    | 2     | 7.14285714 | 0.08566337 | Q9CYR6, Q9DCN2                        | 15         | 49       | 7691      | 20.9278912   | 0.99867611 | 0.89019613 | 60.8339399 |
| GOTERM_M  | GO:0019003    | 2     | 7.14285714 | 0.08888623 | P35283, P56371                        | 28         | 60       | 17446     | 20.7690476   | 0.99990053 | 0.68398258 | 64.3440741 |
| UP_SEQ_FE | mutagenesis   | 4     | 14.2857143 | 0.08970462 | P05132, Q9CW03, Q921F4, Q99PU5        | 26         | 772      | 18012     | 3.58947788   | 0.99984006 | 0.71311474 | 64.2604308 |
| GOTERM_M  | GO:0001664    | 2     | 7.14285714 | 0.09453329 | P21278, P30677                        | 28         | 64       | 17446     | 19.4709821   | 0.99994625 | 0.66457351 | 66.7172763 |
